# Supplementary material for: Age- and Genotype-Specific Effects of the Angiotensin-Converting Enzyme Inhibitor Lisinopril on Mitochondrial and Metabolic Parameters in <em>Drosophila melanogaster</em>
Source: Preprints.org preprint supplement (doi:10.20944/preprints201810.0133.v1), 2018-10-08
Supplement: Supplementary file 5 [file Supplementary Table 3.xlsx]

## Sheet: Labels
NW-MRC Id	Genotype	Treatment	Age	Rep		Age
1	DGRP_73	Lisinopril	3	1		1: 1 week old
2	DGRP_304	Lisinopril	1	3		3: 3 week old
3	DGRP_73	Lisinopril	1	2
4	DGRP_73	Control	1	1
5	DGRP_229	Lisinopril	1	1
6	DGRP_73	Control	1	2
7	DGRP_73	Lisinopril	3	2
8	DGRP_73	Control	3	3
9	DGRP_73	Lisinopril	1	1
10	DGRP_229	Lisinopril	1	2
11	DGRP_229	Control	3	1
12	DGRP_229	Control	1	2
13	DGRP_229	Control	1	1
14	DGRP_304	Lisinopril	3	1
15	DGRP_73	Lisinopril	1	3
16	DGRP_229	Control	3	2
17	DGRP_304	Lisinopril	3	3
18	DGRP_73	Lisinopril	3	3
19	DGRP_304	Lisinopril	1	1
20	DGRP_229	Control	1	3
21	DGRP_229	Lisinopril	3	2
22	DGRP_304	Control	3	1
23	DGRP_304	Control	1	1
24	DGRP_304	Lisinopril	1	2
25	DGRP_304	Control	3	2
26	DGRP_229	Control	3	3
27	DGRP_229	Lisinopril	3	1
28	DGRP_304	Control	3	3
29	DGRP_304	Control	1	2
30	DGRP_73	Control	3	2
31	DGRP_304	Control	1	3
32	DGRP_73	Control	1	3
33	DGRP_229	Lisinopril	1	3
34	DGRP_304	Lisinopril	3	2
35	DGRP_73	Control	3	1
36	DGRP_229	Lisinopril	3	3

## Sheet: Pos
NW-MRC ID	QC-1	1	2	3	4	5	6	7	8	9	QC-2	10	11	12	13	14	15	16	17	18	QC-3	19	20	21	22	23	24	25	26	27	QC-4	28	29	30	31	32	33	34	35	36	QC-5
C28 H56 N14	72129	51862	55301	74569	65031	62702	62830	44918	62414	63856	56546	67287	65397	64145	66410	48191	62664	60628	51865	59991	50477	56699	69898	50484	48626	47970	50269	54215	49856	46710	56977	49400	57169	52921	66598	61962	57030	48291	45068	52668	50840
Virol B	13031	40105	23752	48393	19294	15027	9061	57582	27152	44096	11891	26748	34683	64097	10508	21626	56090	24766	16416	21755	15782	57101	32086	36692	17349	53146	16352	17334	41246	33736	32870	29442	21366	47982	66326	13051	25665	63421	31087	66504	35772
1-Aminocyclohexanecarboxylic acid	93922	84384	109422	85611	64064	96309	91309	80457	72305	85067	87183	101369	98170	104158	137316	83871	88865	84492	99916	98766	92841	89387	107310	82277	71942	66049	81316	82921	83593	80858	88173	70163	101858	71014	98000	88317	118401	67520	65555	87714	86185
C32 H66 N5 O	150647	113181	123476	137320	119185	120035	163431	128474	109247	132724	239483	136055	81573	52669	128482	125668	249993	155400	116972	253826	124716	279988	87424	114315	115114	60594	246778	122668	134072	55496	127117	128396	116906	231654	124723	126320	115332	105539	119813	133301	114845
C34 H61 N6 O5	97988	57046	68132	76532	67534	98027	73060	45804	65845	82509	76039	71144	58076	51946	65873	71743	78923	93416	67579	69309	92859	69823	78313	65412	61579	69614	52873	63970	55693	54784	89147	82913	56409	73343	58711	60462	51057	75265	60764	70156	82009
C40 H82 O3 S	56894	38932	58349	65379	29768	72147	57896	43284	72507	44467	59601	71171	92580	51290	62799	67536	35740	76095	90969	75582	63108	78673	69736	76873	42218	41064	55395	85323	64615	75804	62396	52087	65925	57342	60648	68655	66676	90500	17628	67819	62155
Bis-?-glutamylcystine	64009	48525	65287	62351	47735	80765	67214	60320	54031	48380	65862	66866	68399	68857	73260	70769	61825	55376	83057	67868	64922	69609	81778	61231	60153	45375	47504	84532	49810	71178	64894	53405	63346	71487	55950	59994	76633	80860	34859	53750	65138
Lacto-N-triaose	34379	16427	23549	42441	25230	64001	33343	17492	11287	31360	36224	74039	15872	65446	69046	67632	32285	21877	30814	19348	36053	46813	77815	52150	44351	54213	35157	35257	11268	40301	35200	34048	28387	12708	28460	33053	80819	70842	7916	39183	33870
Becanamycin	36123	54854	16046	58632	52554	23435	77918	57649	92858	44747	31063	30678	43887	21309	31025	15976	39417	45242	27163	76901	30784	15575	33213	21990	15680	17436	15729	26437	28271	25915	42599	17416	20519	65534	23857	65004	16289	16694	62564	23618	37052
> limit Esi+ 7.2839975	53007	54278	68853	51318	47848	72047	64432	64258	43863	64749	52434	74400	68678	72342	51321	67167	49943	77323	65244	64406	66455	23417	74892	76390	66546	66153	49175	45682	70888	78656	63940	59160	37750	40475	62926	66174	70279	66125	33366	56252	63188
C36 H76 N7 O	139441	133184	134480	131415	201582	131059	121666	124219	128652	132408	128428	197730	123315	126616	122496	123770	200658	125373	126576	132648	130000	122579	126825	128564	129426	135320	122047	121334	126966	134870	204091	123954	125248	121823	132941	122582	131353	122313	126449	121584	130030
C7 H12 N7	55869	162910	72583	48514	47684	74826	99496	105275	30895	161273	51789	63021	136719	88805	37306	98310	21859	79972	50177	39625	85097	39164	38923	94553	34170	79357	47355	39106	104073	136188	99646	46610	30008	32873	122138	108489	44641	128964	123250	35558	99608
5-Methoxytryptophan	9664	5558	12593	12300	12384	12150	13593	7423	13628	6716	12572	12036	13310	4416	16803	11789	12415	18245	6943	13310	11465	8266	12665	3755	15502	16756	92731	10851	13802	5506	13376	12545	9889	6094	10879	13466	13664	10610	13194	8056	12410
C33 H70 N15 O3	75680	56839	79011	75178	38793	89072	71052	50814	90043	55038	76734	76089	103018	75228	72973	81254	41812	94699	100424	89283	75805	78513	83735	94612	53815	44376	71938	95984	79974	92047	74251	63672	83763	74607	71895	78435	84339	99133	18821	82994	74613
C28 H42 N6 O S	76181	73645	49942	59947	86214	31254	102839	60176	97239	62127	47153	53659	60358	34948	54084	31977	54808	57931	66011	94608	56126	36255	42267	46540	47346	30775	35776	56521	56153	33729	49112	43646	63285	89589	53549	87071	26767	31649	55648	31819	67661
D-Urobilin Esi+ 5.2100024 :25	233242	274837	104726	199786	225727	159666	344892	297544	508035	192342	253973	201049	390184	157733	253580	143068	131151	329992	273252	457171	228656	150547	236739	179481	154764	100976	123830	252913	217534	190480	242006	154046	193260	431096	190801	299103	147378	182784	253714	182160	231463
C22 H16 N2	31263	22180	37908	38452	23593	37734	44791	25476	69158	30471	43371	32004	96095	29294	47353	53943	18903	72885	86375	61049	43406	58920	46016	63847	34683	23463	32308	62478	61790	56787	37482	58283	48957	33862	43673	32694	33530	93582	12045	56454	42395
Allantoate Esi+ 4.294001	221986	562739	267437	184376	188199	120833	150802	289697	138305	183653	221213	95968	112109	91463	81632	523015	260159	109754	217506	154378	223067	157767	83418	105992	196478	98114	175448	269074	148449	151294	232437	371041	189727	283510	168476	159037	131838	158722	181611	138562	238262
> limit Esi+ 7.101 :24	65775	21686	64498	49424	18480	86378	46265	33565	85539	29814	48560	46134	109278	37512	54286	80895	26564	70610	96825	57960	48049	59587	66464	82825	27771	20831	42387	101200	54250	67928	48218	44289	61795	48684	47861	52013	55104	74905	9391	79352	43209
C10 H21 N7 O	97821	91120	50799	111357	93897	88576	111787	95938	122163	104875	95093	78785	102262	87927	97902	95441	99564	101092	106462	97154	84197	90575	95191	97783	97200	63282	87379	85111	57412	79097	72801	88967	55252	94746	88980	107296	93676	97782	66678	83203	73888
C29 H14 N7 O18	103388	91161	82559	94909	81943	96718	91014	90335	101830	85699	94265	91853	89984	87138	94091	79722	79317	96306	99766	97765	92578	91183	98989	98505	85399	85781	93927	95067	100149	92332	96809	93367	94526	96737	93000	95703	94351	94070	55137	92512	92576
C41 H67 Cl N6 O4	105400	90797	106178	109959	89061	117818	114594	91136	99537	109176	103381	108816	106436	85073	110688	118344	96843	91066	115850	94406	105476	108929	98809	101021	104741	112491	95013	134216	89677	114802	105009	102391	101686	97565	109272	102842	100511	113091	75652	99390	101365
N-Isopropylammelide	53263	26895	52406	35776	41647	43304	38610	30327	33018	44678	54599	41222	62457	46765	68922	90741	34916	49753	89979	50427	49055	49799	51542	43016	79281	45080	47240	110930	60224	54205	55394	72102	79905	43586	60944	44490	61356	59264	19619	44966	57760
N-Methylethanolamine phosphate	74529	93200	62395	58700	72799	58028	82733	83265	58617	70971	62501	68132	71152	67605	62682	56922	76222	84410	61276	57561	58238	61699	60283	63184	81401	64430	58966	50194	63973	59183	65571	58423	76770	61052	68924	69344	63771	57956	186340	60788	54255
6,7-Dimethyltetrahydropterin	55921	67046	48886	100799	50984	57771	86224	68235	63532	71324	43117	67059	69212	74631	52161	87425	54357	72027	46547	59549	56058	80940	63444	68880	68773	73840	48336	59080	83710	54661	53757	66549	73302	68862	58889	66210	60286	54577	43766	68468	53116
MG(0:0/18:2(9Z,12Z)/0:0) Esi+ 1.7089999	45749	44509	51673	64166	49607	54361	88125	62827	107812	65414	47651	61207	64523	31282	59967	60467	51781	56484	93742	87551	36409	82960	49941	31738	46526	48780	64761	93541	45245	51959	45543	50739	82232	69670	72342	74464	44462	62543	27371	50038	54416
C6 H8 N3 O5	850570	1174860	754172	178037	770717	123341	720107	768548	189608	659084	115912	613065	1176079	897313	799464	305773	166877	1090132	817720	118793	187178	290511	169026	1128614	1256589	876618	895395	343277	1453950	1422764	123398	159758	667041	149141	682590	552054	888265	1212473	1503415	1745887	922621
> limit Esi+ 7.289998	41126	22072	60732	40219	11400	31874	46690	29761	30929	34105	42587	51187	38639	34370	45442	71073	37440	39956	73040	38727	45106	41467	54145	24648	58152	28854	45555	93999	28434	39112	44944	49971	53603	30454	53473	46779	31511	47849	4789	33814	45129
C23 H41 N5 O2	60018	19612	43363	13819	28268	17856	21732	19830	28370	19475	47502	21598	16367	34973	13367	17207	29703	33384	25221	36092	41587	96284	28540	21263	30176	22906	28654	16955	35201	11881	47367	24918	29112	34616	15916	24130	29597	32809	18946	30575	59619
C14 H21 N4	42286	60183	40899	40328	36987	45784	61746	45074	51772	42225	43570	41721	49924	49188	46344	59108	58279	54261	48007	47233	43443	49650	53096	48360	50011	44748	35287	42427	51793	44966	47389	42396	35624	35511	38401	59004	67030	40806	36800	51875	59075
Sulfometuron	51603	49894	69565	66816	43471	72834	58616	52348	68200	53980	61472	63798	62305	49389	62044	77787	50833	47951	84642	60797	58650	58215	66906	48258	54553	38375	59547	95977	51794	58535	57755	64415	71787	65975	76253	54092	61371	69810	37385	53917	62416
DG(14:0/20:4(5Z,8Z,11Z,14Z)/0:0)	101621	66742	84977	89405	62949	97082	83948	49531	63276	84954	90369	78235	71779	64729	75346	110748	72851	99781	93339	67840	97288	88886	68329	75372	71859	77465	92413	88741	69721	76179	92203	76655	78026	64375	83555	73976	75706	78744	57557	83842	99754
C14 H18 N2 O18	36407	39691	38772	20546	32433	18617	23146	34000	62344	22020	35683	19435	25058	9487	20684	59748	12521	11804	80490	48631	36370	49054	18639	13942	40729	28414	35910	91523	15077	14908	37140	64884	52014	75045	55195	19970	12625	59116	30469	10569	36391
C6 H8 N6 O5	23808	18399	33119	28276	16257	20635	29489	18693	22689	22640	24787	23250	26136	21448	22677	31783	20520	16940	45689	26347	24853	36766	27576	19842	26786	17963	28532	47245	23121	22652	22288	31963	34688	23885	31001	26047	20494	38324	11906	19281	26189
d-Dethiobiotin	43560	49163	39613	33852	55353	35174	49465	39407	53646	54960	31369	46399	47007	50596	47160	37536	40833	55150	48353	48966	23625	38243	53531	57859	54148	53481	51986	30854	46755	67216	17575	52078	41814	44741	43464	39910	39798	42157	27377	43420	31871
Temocaprilat	69583	34749	67305	83403	32595	84826	75232	49554	65324	69293	67356	73544	80526	59631	71169	78214	69136	78612	78081	76706	71913	58224	68361	62736	63616	48988	59421	80274	55888	78089	68891	63504	72351	62100	70401	76208	75789	74453	16454	65277	65926
C6 N O S2	51754	31002	58397	58658	26915	51094	48509	34455	45912	38969	46702	45579	62600	36502	54146	74016	29936	40364	88314	44914	50427	67973	46998	41418	44381	39872	49116	106213	41343	51389	48590	57329	58093	53754	58758	60272	39909	68909	11850	38121	42782
<none> Esi+ 7.0720015 :23	99261	95667	92923	96962	97010	87724	98420	97326	85709	95646	93073	89292	90581	95382	92463	91456	94591	93590	45490	47027	97511	88165	88824	89509	95149	99614	94384	44884	99229	87480	91561	96201	85119	95772	89771	93865	93703	87113	82175	92943	95544
Cromolyn Esi+ 7.2539988	74989	100901	77645	69513	91325	431934	77148	84825	442618	68714	75925	387506	506766	310607	70353	424631	239321	435214	486872	71604	75578	75264	398798	402583	86426	78890	75827	93143	80192	57117	71466	82239	79129	96643	86637	92294	55890	68627	103296	393331	74318
C25 H44 N13 O	56504	45976	64553	66748	31969	101850	58976	57105	70882	54639	68105	96050	61297	58916	70131	72733	65108	46074	86330	74648	64208	69140	67977	49964	52775	38895	58823	91098	45010	68909	57679	72233	57238	81663	61573	56713	76388	69550	29993	77964	66384
Dextrorphan	46981	43079	37453	57388	31470	99850	52978	60084	68696	52141	44619	57384	48918	34282	39339	53720	51528	44394	48081	51633	48947	48171	50849	41909	40157	35752	37255	43266	47190	41831	40151	43781	28791	53114	44506	42153	42721	51392	40032	57022	50169
C29 H65 Cl N9 O2	118206	142970	165927	194903	198414	119203	212216	122735	161468	193987	113099	107606	143413	145235	159475	101973	185400	105555	167147	163599	173420	183306	174652	139724	91792	154022	154082	170409	145111	140453	121967	130315	146551	153825	166331	203187	137347	139301	114362	149422	104855
Teniposide	82718	61842	88984	88936	58042	85240	93571	72075	81202	89278	85127	78266	97602	74175	88475	87626	89407	98463	87004	95803	85972	50690	79139	76190	76495	69186	77696	84777	69744	85264	80341	79305	89101	93984	89208	102648	81623	92880	40693	75169	86722
Carboxynorspermidine Esi+ 6.222	317658	249848	276019	387651	291314	371465	335860	324589	399142	352428	368472	364035	401615	355134	363180	445659	359888	89350	16457	413526	382012	13922	392029	105620	383306	294195	350280	485581	345671	428934	432799	523135	373000	378149	369045	422997	376277	428570	260228	428491	386019
C29 H37 N10 O	156308	137855	166009	177514	130405	146265	125172	108778	79562	169059	120415	116533	65720	83125	112552	149480	124604	79664	157339	102480	130964	213425	122934	67171	102319	112039	121187	121921	80207	94615	116853	72880	135844	111479	133070	158387	104738	137470	67409	78650	121256
alpha,alpha'-Trehalose 6-mycolate	76613	81639	71490	75634	89750	39731	76698	83558	72496	79522	72850	42916	35999	77254	40461	69183	84767	67295	60894	72632	79880	40292	68165	42887	86693	88288	82312	62153	79350	71558	76288	76894	65492	75514	41583	77509	72978	42538	73041	74177	81951
> limit Esi+ 7.3099985	90211	59048	91445	95523	51892	111995	82725	76425	89439	92492	89184	104843	98040	99959	94051	92084	91993	97906	81016	91098	93528	46514	98106	110542	90306	88771	94751	79347	90058	112424	91076	85234	71985	79925	90182	82802	113040	104933	26931	107797	95263
L-Galactose Esi+ 4.9019976 :22	868406	588361	459146	683881	357611	935297	725401	637768	752629	372860	892325	498317	1006593	674418	1223217	372527	401894	666134	1166611	629457	846121	1131407	1031861	683334	958078	639258	803881	1897321	663590	941261	842869	880617	1147343	1110490	1023854	777607	1052569	600303	213501	340702	905370
Ampalex Esi+ 8.274997 :21	310458	204484	291148	301076	252708	244376	348803	224948	295012	395887	327559	304332	513827	154666	410959	449537	275925	477268	653684	402540	319434	349155	416391	282378	369298	233494	230083	410569	411026	319595	322541	306167	281706	256567	273387	275551	196077	435941	78931	204504	316764
> limit Esi+ 4.6900015	121286	121750	145017	154545	109501	122430	113865	117161	104467	136275	118315	124603	90997	106214	117839	158609	129125	71951	146996	123009	118737	165937	102474	85227	130259	115698	125077	168378	67672	116660	111470	105385	131938	112218	134905	127619	108163	124474	58115	86457	117750
MG(0:0/16:1(9Z)/0:0) Esi+ 5.4550014	52053	43075	38055	45695	31940	51405	61053	48929	86493	31809	54499	51075	63153	35159	58930	45892	25216	66470	72249	71841	47842	46330	46506	42897	41426	26976	30498	83786	45561	41751	49327	37237	57270	87323	51948	52723	35134	49519	26094	39871	44924
C22 H16 N O23 S	72345	57569	70197	79989	58996	72646	70973	63029	71679	69509	72064	65673	71643	57302	72650	70552	58459	63069	82499	70731	73721	77346	66697	58978	65729	56261	61612	99680	60892	66969	68810	70660	72995	74992	75936	74729	63528	72550	40296	54658	66977
> limit Esi+ 5.070003	60504	53423	45615	81434	40654	44553	106591	67120	116720	68166	60916	56499	72088	32602	57546	49669	42806	66169	94995	125137	59587	61907	52691	36319	40565	27010	39854	83193	38442	41384	59063	44294	68161	114386	57613	98027	33610	51904	26410	44586	62631
C24 H28 N2 O23	47249	29221	47703	50693	20351	69962	49714	33875	72548	39103	46327	53010	88453	40447	54149	61701	25175	66210	79556	57777	46380	60004	63331	68408	29269	25068	41330	93584	55102	67308	46633	43483	57164	49486	48157	62149	55538	76401	10295	61923	47765
Aromatized deshydroxy-C-1027 chromophore	84661	19079	20614	23315	13923	30912	24511	13668	36225	2443	78296	19708	11069	10477	13122	27314	12657	17067	24164	16713	93646	16010	15166	15886	10464	40402	18152	27147	19460	16697	101217	19028	12250	18267	882	18862	13018	24223	22460	17403	116046
C26 H50 N2 O11 S	225312	63621	58689	295329	229833	68709	84112	67066	104045	248894	217987	219828	103716	158117	75162	75772	183541	81327	136002	379226	68348	76745	78196	71843	62165	129257	51257	133945	60425	69149	213066	67792	76666	84855	80508	90901	55397	79637	105265	183998	70140
> limit Esi+ 1.2550001	92632	79659	108559	77459	84756	95569	95717	55331	104130	75458	93699	102006	98966	86368	83575	100262	59691	74913	73271	91431	105294	91435	77590	118900	85973	84449	132219	74771	86664	85818	101533	111359	120941	92973	99298	109753	87694	129997	62961	106735	89611
<none> Esi+ 1.2970006	92075	412672	102931	98934	129499	93678	111726	82051	125846	108665	85046	105525	115437	92157	93421	399117	108169	126185	97311	98336	92686	94702	96904	100590	379313	267041	97043	84639	393565	106990	85613	101882	93007	109953	104138	116620	89616	98596	97037	99918	84992
N-Benzoyl-D-arginine-4-nitroanilide	298524	414297	182672	321804	274325	178172	411295	427343	422428	217927	285646	178767	232300	89979	181431	447590	140507	159461	510466	454709	294616	239242	145198	141062	223528	138776	170498	518349	145827	236219	287381	343756	273597	622228	289168	336848	127877	274360	129787	137309	276593
C19 H33 N14 O4	84398	77788	72421	109002	45369	70484	75975	85919	125482	92502	75569	50722	75345	37028	71553	27549	63895	78518	57303	128863	73639	92023	78348	43618	46492	50429	37399	87235	37982	63315	73619	43810	112358	67900	56091	103258	50307	51601	36859	57541	68476
C8 H16 N6 O	97845	93251	90467	81566	72084	100806	74819	83835	61391	75276	68105	101970	86734	99082	79967	100317	71281	79046	68141	83414	83937	93755	68081	82280	74695	85223	89564	82804	81073	90773	74087	77265	81441	82173	98213	74953	82677	95466	58235	85824	81451
C16 H29 N6 O14 S2	52770	26937	67739	57357	32623	61749	58929	33461	44419	46811	50116	65053	55670	48043	57872	72579	48685	47372	78673	53725	54221	41588	63265	51573	60246	35216	51429	90873	39944	62218	54127	56402	65518	43529	61031	57057	58223	65714	9454	52973	55080
Aminopentol	100221	86899	83474	102063	88984	86545	102209	80108	99665	102250	85902	86144	89111	76839	83043	75966	77853	86511	80836	86899	69401	63911	76281	80706	79980	81929	87991	70666	85691	76267	92366	88922	89007	85571	87736	93911	80666	77306	55360	79034	64320
MG(0:0/16:1(9Z)/0:0) Esi+ 4.23	68877	60897	40364	73838	69328	51415	123080	83718	136758	58274	51863	78698	94184	39281	61178	35883	153770	79480	72070	111320	58951	36364	74797	51091	38792	11781	27095	59032	45677	47438	58342	33491	50734	120867	51589	89792	45233	64693	34863	56393	56406
Fruticosonine Esi+ 1.3139994	132013	50062	153774	63295	88217	70278	65493	35655	76262	86431	85145	47944	76765	38589	73544	141414	62550	61413	49942	76650	145238	120900	61068	79996	129537	139546	99530	120796	110122	66687	76100	108817	104756	51833	135270	58782	66625	111815	46670	56304	69778
DG(14:0/14:0/0:0) Esi+ 1.2340002	567286	617774	384636	427721	555647	587742	744765	439585	1163452	3867	542181	644297	938580	507877	854513	468717	4573	574735	548403	717796	533500	538608	775927	550567	444142	554516	421141	710570	566914	806573	523718	375857	582607	1067070	642413	680263	434469	549956	347098	366751	531849
> limit Esi+ 6.7669992	61409	47148	66415	76328	48668	71637	64797	55380	78864	65301	61893	72233	74181	59173	65943	65512	60841	59603	87473	74088	68488	81002	73690	56570	50169	42790	61127	92174	47007	62180	59826	58340	73503	71371	66531	75130	70100	73720	27605	54005	64463
C7 H15 N8 O S	30318	32404	22998	67121	20541	16556	69348	34676	72232	40635	28962	29259	32456	2009	30428	21651	39935	23993	66437	115572	32293	34664	23770	12439	18209	7320	20909	57061	3227	28465	34406	22941	36652	62705	31105	66404	17109	30188	11090	17684	40559
3-Methylbutyrolactone	34182	34428	26470	38783	30312	34499	31916	31998	26285	29496	27630	27091	23871	33890	43840	35434	27720	24752	28995	25304	30272	30642	28128	24440	25682	25559	29817	28211	29109	29437	30685	29424	26627	28042	27345	32204	32893	25786	23986	26403	35153
> limit Esi+ 7.101	71609	39660	78554	75766	34860	95859	72666	45539	93102	64285	79370	82850	105431	56558	82303	91828	57405	93738	109689	75424	79745	92558	91833	85873	39710	38075	61723	106986	71619	85045	67232	84248	78177	67793	94255	97700	78385	100599	15019	75056	67898
C21 H25 N3	59372	50118	64709	58481	51354	64677	48819	52735	53049	56697	68780	63443	43245	57450	54313	75894	49768	40844	56807	69629	66467	73907	54612	52701	67693	57589	56082	57514	74309	58920	54703	73378	72675	59674	68906	63935	61186	54293	48345	50433	58162
Promegestone	75365	45606	34612	41023	35686	43441	28299	37376	34226	30812	66474	22146	39204	35224	34956	32784	24860	34298	31134	33287	95432	36434	27721	32284	30703	34240	33837	40825	34573	35379	76596	31849	24286	26562	22665	48650	27340	39580	27958	31944	77103
C11 H14 N4 O12	58282	80645	32996	95205	49237	89033	65865	83145	70527	76768	63003	96142	35425	73909	55056	23250	93899	38885	9695	68282	64989	30880	60776	46425	22545	19462	34127	28060	25343	78963	63722	9392	25475	81611	33623	76668	86491	16894	64702	66951	62950
Ethoprop	417698	106016	797038	672934	248087	670931	511086	178502	294135	379056	415683	599086	283863	395402	654885	352886	384449	315369	303396	287087	415687	769245	585874	231030	229318	507886	599514	774085	201970	204308	417024	145794	769531	333100	720980	434168	533395	259031	65215	128223	405162
C33 H13 N13	85698	36268	89114	92610	26391	103953	82760	59455	62531	74548	82272	115542	83864	84239	81537	89747	78682	80149	90817	76813	73158	60733	103854	81272	78971	49401	72660	98186	59654	88206	75808	75611	69034	51380	75696	64337	83080	84101	11216	83995	75237
Levan Esi+ 8.339997	256637	201827	235570	240314	204025	260994	228261	202364	162726	194911	250690	264893	195043	245863	279260	294872	197924	207526	228429	196753	247046	289339	270204	249376	255259	266578	243561	244339	191437	239309	245772	248316	222593	174657	234323	222688	259675	285261	172956	239430	237624
LysoPE(20:1(11Z)/0:0) Esi+ 1.6889997	76521	77522	44703	128747	69685	59526	129434	91891	115320	128896	69743	64978	78448	38527	64022	80434	96631	75696	101343	135435	76241	61036	71628	60501	50068	21407	48421	52461	57151	78178	70152	58957	51344	91476	43840	110496	41847	74882	84473	66561	67001
Dodecanoic acid, 3-hydroxy-, (S)-; L-3-Hydroxydodecanoic acid	90574	91971	97405	89256	81154	89811	93529	88422	89127	78188	90840	83078	98800	86121	91076	105741	55272	92416	89468	87361	88234	94492	92682	87836	92749	90250	89056	96982	81755	81266	87494	82260	93793	91790	85950	99837	74543	98657	48444	79112	83078
Integerressine	122026	100388	57986	117718	96057	110415	181765	125602	153981	89588	124564	91274	128235	71895	130036	86936	73625	124666	156800	147793	109850	102830	116699	61528	94158	55840	89978	134062	80852	101983	125595	77294	81453	130025	120619	161528	91636	105125	50076	55368	107702
C33 H49 N6 O3	52604	62326	56380	79237	56337	35864	95194	59409	83826	69261	48110	51299	50077	29606	55399	41341	65612	45224	63651	69809	56556	66031	41376	34763	42347	36937	39978	52492	36022	43795	56622	41813	68826	56136	58865	84890	30987	43825	136843	36061	44227
N1-(5-Phospho-D-ribosyl)-ATP Esi+ 7.1789985	81177	102713	75475	71263	119904	55991	73632	104208	66507	88860	75446	63205	50509	80814	67898	61694	85768	61438	55900	65576	76148	55778	49895	61970	99415	103742	82944	47799	76431	61196	67630	78833	66518	77302	70858	65707	64978	57023	571001	65011	77394
Fosamine	59941	42610	55754	91200	46717	61956	62704	53207	63312	65661	57659	64711	62637	44574	51823	71565	50344	56234	89553	61801	57258	66491	60485	60667	49866	39017	48386	112232	47291	67368	59655	67199	50885	49839	49190	96672	49457	72958	14221	60164	54230
> limit Esi+ 7.5180025	17245	8054	32488	17960	6076	12695	15265	6363	29521	13049	17049	20028	22043	6269	12233	25122	5713	5113	77979	19156	16420	36825	6876	5728	18132	7880	18224	111126	9065	11118	16078	33219	35758	24167	31783	10914	6983	37183	5323	3335	15806
Serratine	88677	88055	81028	86654	88281	73370	78027	84029	106354	81053	75713	107992	73749	73765	73870	73644	75554	78231	62759	67378	93994	53641	100709	66251	65274	66047	60048	54337	68610	58590	69519	60247	53518	56869	54161	80370	82285	49890	51392	53692	51068
Isopentenyladenosine-5'-triphosphate	64620	44960	61886	84666	46324	95070	60783	52842	63137	80338	62982	91646	55571	68817	65606	54183	69683	63832	55207	67103	60971	59183	88380	66895	43441	41936	50936	48515	47194	61582	63648	49179	47841	53930	48171	61058	78807	55695	28440	66948	58900
C44 H18 N10 O	88487	40520	92467	94698	28126	110146	80240	64067	69229	84499	81990	119888	78165	90681	86333	95312	85546	87263	84444	74849	85660	54324	110189	84514	86017	59482	80220	86422	67149	90082	80391	78737	70327	53984	75938	68788	93452	82560	12285	94028	77891
C16 H28 N3 O	87667	63106	92921	99691	59606	76600	93589	79971	91179	94470	83401	72509	88042	47588	74289	103277	72042	61706	129855	111741	74804	97528	64307	55394	87276	61460	80758	98922	63995	66912	84611	71357	95999	73137	102975	89949	64445	95752	25834	49421	79933
PE(20:3(8Z,11Z,14Z)/20:1(11Z))	93617	98973	82606	87726	99607	48820	85728	98728	77097	94976	59952	47965	75266	91007	44947	84806	97764	44408	73431	83960	90398	47378	79481	79751	93427	95510	85928	75665	93231	84466	87978	85491	83334	49130	87808	91257	83831	81400	89329	54235	57294
PE(22:4(7Z,10Z,13Z,16Z)/P-18:1(9Z)) Esi+ 1.2560004	120796	87388	104161	105239	81520	99966	110287	91179	130438	80514	104823	103109	108328	85725	73044	90023	72570	113945	100144	104524	89273	109033	76633	108631	77308	132607	108573	92207	85104	107284	100848	99823	94483	103252	101144	118399	96005	143667	63324	94784	100888
> limit Esi+ 1.2270002	119174	136036	76242	99278	84202	102280	90971	98967	135225	91929	113378	102857	140528	65311	92425	113919	93281	140992	139915	132322	105119	89108	88901	122863	109288	71263	76057	120137	135859	124089	106972	122976	75654	132724	79188	94290	79120	103247	101195	118446	102556
C29 H40 N O	79553	55823	56861	55602	60875	69530	59492	83389	55297	65404	79732	55862	56287	54439	66929	53264	54855	70517	67327	76619	84647	103395	73773	61093	48256	46997	53110	57535	66778	59428	88365	68508	62595	61256	53469	66570	116018	61641	46286	56699	74746
Mannose 1-phosphate Esi+ 8.1310005	524577	353242	281314	688895	439418	1304120	566774	325924	594372	400299	532705	1308244	492454	784490	1082014	94058	565555	277662	69857	397814	546466	70743	858439	493191	366473	311628	398067	294926	225062	586831	543970	275316	57636	570433	65353	666815	1594994	69117	216454	493975	54341
TG(10:0/10:0/10:0)	84563	74172	83435	89835	93362	79839	112719	60489	123508	81373	80069	79903	125147	65729	94783	81160	71734	74504	100164	111354	80059	92891	95404	80958	77962	94476	73898	111052	84763	77453	83449	75020	102088	122126	101948	105468	66022	117403	62877	57987	81298
C34 H70 N5 O	199051	153284	165012	279359	295976	159803	283949	169206	149713	166688	166663	169778	180606	157953	168674	154023	150213	150427	164314	156453	167939	146696	157623	167536	162234	150712	166128	156143	149016	163373	170648	189545	171777	170896	272022	169556	159950	150161	164580	160035	158197
C30 H66 N9 O S2	127662	131633	112257	138931	137808	68374	119736	141366	141260	95724	97256	57747	84849	53212	62693	83793	111176	68839	92772	123103	100486	91088	63582	71792	86993	84171	107698	91112	66533	51117	101614	106456	104213	154816	100218	104600	56983	94997	130963	75464	108116
Floxacillin	57030	45363	52707	84600	38459	99278	59940	48325	58524	77221	56758	95719	56185	68598	62061	47602	72110	63979	51254	63788	56299	64903	97549	66942	37292	36423	44618	46541	46923	63565	56061	47892	49387	52237	46771	62048	82432	53608	27652	69627	53602
Haloxyfop methyl Esi+ 7.1020007	10902	102901	867442	890285	97482	947626	830507	14638	955372	716172	837462	868206	1029819	11501	881931	903791	12306	932183	967290	905223	840625	903389	909570	16262	705548	79373	10359	982021	13142	930912	824592	798108	883772	75357	838223	843130	861569	954011	86034	16080	818072
C20 H47 N9 O3	335688	79467	304605	317060	306753	277046	334161	238105	333948	328112	333924	295906	318279	72852	63694	229709	337979	318702	333679	324500	322445	462295	277064	281278	347858	380250	274658	314009	331432	286848	327229	70623	57980	80771	309069	290835	237446	212353	62061	268379	308106
Intermedine	413314	415987	432445	420048	412398	396288	411466	390032	407811	417259	409396	427457	424977	410928	415937	420503	410515	411190	416972	397390	407607	404543	417216	429479	427270	425655	409536	417229	431218	414168	393576	427081	415465	418761	414698	421205	402070	410212	284455	388834	398023
C12 H23 O S	97292	87362	80617	83378	85396	90279	88271	86020	91201	84985	96030	88651	90126	76636	74877	96891	85074	100159	91671	90151	96620	76799	86882	86937	77523	82828	89075	96449	79697	88530	90606	75016	91777	78286	108632	77517	80058	92357	58660	73122	94908
Triflusulfuron-methyl	38399	44663	33880	16540	40262	17293	32242	32859	80054	17675	42943	11805	53256	11966	43189	29619	11299	13067	74222	63257	42320	42168	23299	3737	29796	20156	25858	96183	31457	4492	41329	56004	52823	98820	47540	22815	14343	50906	25542	1160	44286
Oligomycin C	97911	102339	88195	92569	101527	48992	90838	101972	87839	102910	97780	88129	79525	98873	51370	92719	101701	87868	43058	51036	97397	81788	88339	92585	101492	100717	97981	81132	97448	88564	92877	94569	57427	96119	91895	95988	92920	45054	94677	50519	99678
C14 H22 N7 O10	89278	83009	82120	84124	88631	82803	84618	85951	83767	83706	83933	85512	81116	83314	83111	90685	98161	87489	81091	83665	83400	77096	83337	82631	81239	78449	72463	77717	85131	83298	79284	82946	76982	81595	81637	86476	81840	73831	65642	80334	83058
C19 H30 N5 O19 S	99034	62795	100033	110295	50689	114945	95776	82999	93617	98708	98042	108751	105862	91494	102318	97984	94646	106291	93701	100572	99367	55755	107873	113832	93192	81156	94562	99234	84719	114530	93013	94308	93953	88218	100904	94055	107893	117934	30022	100826	102640
Xanthommatin	1083338	913690	1099820	2754	862886	1187709	1049803	952617	1170028	909713	1059507	1090617	1235978	1006126	3348	1134777	871827	1162039	1177845	1098773	1055413	1130565	1132308	1163011	906742	904874	1031269	1202483	1098147	2219	1053689	1009186	1090268	1027499	1053847	1052734	1077056	2182	605454	1116353	1038204
Acetyl CoA	72534	36083	80849	79393	31588	98580	71446	43719	104228	48079	73540	80585	118474	64467	90544	98022	47789	103453	125039	93401	76220	102346	99156	101236	43066	34845	56575	133030	81420	97954	71987	73235	97133	61658	80733	86325	84590	114534	8025	95652	73673
C18 H27 O22 S	37261	34259	36463	20702	29233	15212	22952	33088	62069	17076	35307	12715	21096	10136	19761	58637	12130	11685	82741	48323	38072	46715	13407	11969	38612	27022	35365	96161	16456	10753	37005	65920	53439	79571	58299	17128	11751	60270	25371	10984	37371
C14 H29 N3 O3	86937	62666	60747	58380	59829	64411	60703	86213	86287	55870	86707	60553	90025	58906	92485	55538	57933	77310	82081	73020	82534	78047	84052	82561	58319	60070	54450	83926	83377	66812	81368	77431	82141	68185	97547	63573	78523	57589	57779	80648	78135
> limit Esi+ 7.291996 :20	85106	32260	65354	60548	13405	88494	48132	67163	71861	47531	85884	80119	87590	73294	87585	58290	58112	64540	79091	54701	87579	39529	103417	109581	68244	51577	58975	76975	80477	84682	84850	73207	69147	40943	75952	52624	102385	68017	5901	113141	87548
C17 H31 N O3 S	119649	49538	28484	39566	70645	60320	35866	72317	87024	39985	156031	40735	30216	68645	63565	82363	45386	139565	64953	26968	146288	119710	32560	35892	39911	64448	49214	51716	34860	54201	85469	38779	82028	57592	75716	94598	89371	30550	38811	58907	128699
L-Galactose Esi+ 4.9019976 :19	876657	603966	748733	682457	464273	913701	728066	667971	826984	467945	889280	756751	1128068	652032	1206866	1317844	411842	660782	1180648	666682	843205	1044770	950366	632819	919563	624487	746944	1931329	658316	929233	800240	851601	1158829	1198707	1014461	728106	951042	879843	219855	547615	854049
3-oxo-hexanoyl-CoA	82456	56439	80275	87083	36457	102202	73526	72213	75651	83259	78511	89987	86967	85960	86980	80685	86091	96039	61256	79088	77657	30160	89105	92739	79176	79290	81012	61241	84201	103790	86141	70052	59932	67682	79347	79982	98293	80624	19788	102103	76375
L-Galactose Esi+ 8.345	82333	39276	77039	103178	47877	121591	89820	45427	54355	82014	92396	131444	57158	106256	151625	112213	76179	46089	71136	57935	87334	119934	149487	86579	91795	96977	91029	83435	43801	86902	78845	102243	98462	56026	102348	95843	142283	125554	18188	74744	87262
C8 H20 N7 O2 Esi+ 6.227002	638978	494073	574133	572505	428370	654495	512139	462113	428410	504280	78693	556020	101129	484614	484731	66373	486580	100257	40465	64197	94244	415046	461710	412372	72354	403908	354041	51757	344665	89479	355499	40997	332381	45182	50777	47612	308737	38318	305911	305458	53476
DG(15:0/20:2(11Z,14Z)/0:0)	123835	115113	121470	126508	99023	117516	120961	116923	101655	116633	108554	109008	97597	98370	108478	119167	123107	89366	123885	125262	110326	124724	96720	98631	109721	94119	114319	105802	79759	115822	111750	98298	115005	94494	110424	116200	107333	138021	68283	94400	110371
C27 H52 N4 O2	93025	81891	88319	98369	76181	154357	179837	76720	127749	108545	90753	80276	96596	69357	85886	89973	90612	86645	115161	124313	88849	106745	96604	64514	77201	75304	88594	123591	62854	68645	92252	74421	92223	98690	88620	116566	65839	84999	65152	87655	93020
<none> Esi+ 6.813998	108361	111162	99927	107863	106651	102881	99618	105508	101805	101735	97140	103354	98254	101753	101456	87552	108292	100936	88793	101783	98735	92570	102391	101082	96835	97768	98508	87414	99450	91315	95722	91803	94591	99177	90479	94054	101200	86575	104271	100153	99201
DG(18:1(9Z)/18:3(6Z,9Z,12Z)/0:0) Esi+ 1.3549997	573087	453885	692773	526653	435353	568844	555914	340878	495574	459119	497753	539507	516313	359358	528061	742721	438884	374520	859790	562819	520513	958114	434000	456747	670873	749542	703507	922944	428679	501484	624030	686883	704647	492864	647966	452800	496803	676090	304077	456280	598983
DG(14:1(9Z)/20:0/0:0) Esi+ 4.7440023	105159	152265	104428	95280	110267	100174	89778	102085	106651	93322	112641	127260	113215	110071	119248	97761	98537	119955	114603	103993	92573	92027	131938	116900	104993	95161	90616	92429	112980	104830	92099	105030	97862	105340	84038	87926	107340	99476	94746	97557	82921
5-Hydroxyisourate	117678	125096	115304	121629	121207	111293	112494	118714	108390	114703	118115	111350	81901	117036	107193	114766	106701	109756	110597	111068	119703	113312	109028	120767	117915	123765	111079	113760	113696	104040	118289	113113	109199	107445	109956	97459	108627	110324	102105	111225	109129
C5 H9 N2 O5	118592	252598	223664	144164	104656	111282	162605	292468	329579	108729	134519	114100	240271	101523	110253	249037	93176	269392	237304	287605	134135	229004	131009	120432	244925	196409	227615	235188	235242	241219	143099	215414	221502	271388	216996	160908	116396	216448	210786	140724	232800
C20 H35 N7	80820	90994	78586	89937	96691	86600	93940	85142	79567	95600	88631	83722	103816	73758	76512	60664	79763	72415	75895	76882	63336	71411	88102	78150	52961	48620	62756	73585	73554	86764	69898	69028	78141	70128	70125	87461	74930	73547	73694	86341	61920
<none> Esi+ 4.839998	282180	273490	284667	259771	261079	275082	241892	279044	231267	252726	282618	276693	250981	295161	260856	283076	250234	263991	249279	238689	276507	269539	259207	286649	287431	293977	276945	277541	270971	268986	278165	289534	269706	246809	273498	250889	188332	268811	247147	311392	310732
(+)-Luguine	52419	16436	108656	82716	39477	84157	69486	23007	38428	52509	58075	80640	32752	54883	80010	40034	52315	40381	37297	41055	56028	92233	74725	29459	29605	75890	75721	76450	26887	25946	54598	18756	95007	48897	101668	44507	71951	36175	19581	18524	50094
C22 H35 N3	95480	86635	146631	116816	96067	114677	133821	84113	101388	89140	114986	141088	119039	138592	121219	102297	131306	113725	123186	90310	87475	89439	97466	88538	141421	146432	102715	66092	81443	117383	75878	135860	128923	123956	138641	140077	100565	104188	76676	77488	87282
N-Acetyl-D-glucosaminate	47960	22482	90195	77525	20645	55992	66162	29822	55076	76690	63032	60188	102912	40309	78020	64841	58752	65142	122409	66495	65734	103072	74628	49453	64482	43420	62227	116013	52411	78441	65806	79809	103864	52373	68070	83183	60656	90801	9187	47531	63334
<none> Esi+ 1.34	113339	112698	106718	98273	99731	109863	98353	102940	85367	97731	111389	101472	94244	102413	103963	95402	103158	103498	100847	93143	106533	103096	113324	100701	96536	105472	101008	91757	96079	95764	115212	94663	105098	92471	99740	91496	99633	105320	79066	105836	114582
C30 H58 N2 O4	121022	107750	107003	117876	94650	97379	127126	80806	145069	107362	122069	99586	137905	97179	108212	104870	94828	102952	128955	117617	108650	117680	111586	84670	102722	90334	97012	147367	104699	109014	106271	106919	115811	130962	123112	109913	85248	119559	87955	86627	104378
C11 H20 N7	89779	67719	47193	55918	27163	50259	40341	69945	31654	57413	83968	42761	51167	59812	46737	70609	31662	66585	37744	47141	103204	38169	42013	39274	20259	28415	40439	39844	47666	29501	92629	39146	31840	54801	48806	36777	47437	42241	32397	32989	89582
Crinamidine	30922	27509	9821	25392	25442	17188	38536	49714	65845	21443	32584	16118	66838	7411	26137	39168	19104	69051	55937	119122	32472	15176	22966	39666	18420	8777	9542	23467	51690	37912	32905	15127	15243	42960	10732	29019	8496	45915	20850	18744	29081
C21 H13 N5 O5	95846	94244	99146	94359	87213	80119	95886	99075	91085	91082	91371	87722	88505	83979	85217	105280	90601	93435	101891	91440	90732	92525	175309	88477	97143	97142	79947	122812	164380	175791	89240	93008	97185	98631	90980	100971	151457	88423	74868	87316	90169
C32 H19 N14 O2	122243	65520	77914	79266	68811	73939	80736	70244	83714	68627	101097	75276	74551	62173	67877	72236	67892	69801	86507	80773	104194	79270	79290	67564	65445	67439	64387	82426	71001	65475	107560	67597	68210	72598	64883	79180	69327	77236	51507	62696	108088
Hydroxyvernolide	126084	125805	118935	98527	95335	103205	102107	120309	91433	60188	92111	82383	82678	69843	81895	92786	48642	66472	83304	83805	78462	64725	68926	68544	65939	53130	64279	66450	55080	69919	64275	63837	63467	76725	59490	57373	48205	59812	50793	65272	65865
<none> Esi+ 7.0720015	112473	115300	107708	107986	111244	104724	111171	115699	101969	112376	110780	105662	53165	115216	104691	108193	110265	106638	57456	101381	112185	101999	100950	104740	115481	115196	110136	60587	111129	106097	111024	109240	104711	107719	108575	106662	109925	103637	95933	109050	110963
> limit Esi+ 6.7629995	75047	64129	82310	100644	68069	97711	93424	71002	100325	88938	87535	94206	88940	73402	82274	85020	86437	73986	115009	97659	84191	103816	92945	73685	72850	63486	79585	112905	69248	82360	84429	81172	93139	94281	90744	91534	83047	89498	40891	73927	87309
2,2-Dibutyl-3-(4-methoxyphenyl)-4-methyl-2H-1-benzopyran-7-ol acetate Esi+ 4.6260023	147651	179458	81041	153678	129410	101767	218549	197362	286923	138655	148663	102865	211259	44638	132461	129160	118213	170177	216120	255634	142449	123109	98818	67310	118307	44184	79632	153717	65359	152553	141097	70274	139847	278837	124205	191349	85125	119942	52870	110090	137776
PE(18:2(9Z,12Z)/15:0)	124215	145852	106166	118026	113145	121469	129361	148015	140224	112881	114161	120707	145957	106647	129854	132419	113181	151615	123129	110863	133099	93607	125788	121365	113587	83410	112929	156881	125196	138334	126913	117944	93219	138828	117559	124040	115596	135306	129751	122009	111056
N2-Acetyl-L-ornithine	54368	85888	34087	48376	69829	38547	48087	81511	60352	65324	54461	47251	66501	63655	37482	55608	58657	66462	57535	60888	51266	36012	47536	80092	67708	43579	37432	31079	67567	87290	52242	81419	30988	47085	26798	59694	45272	65462	66421	110613	52886
C16 O16 S2	113787	116153	105492	112155	114509	108811	102727	114082	109635	112320	105561	104245	102721	110799	97768	94615	115718	108100	97556	104329	101931	93257	104128	109805	104219	103650	103932	90954	103611	101517	102644	95937	100082	104866	98708	99288	106146	92848	118990	108202	108318
C17 H38 N8 O2	68891	151820	53174	67779	63011	119424	51401	147131	71961	60040	54869	43900	77792	125617	65114	85859	70150	68181	67822	79702	60356	62008	50296	67644	61850	57662	44714	65540	94838	72554	77130	61845	101962	65556	75886	56992	61340	48128	116119	67407	80206
Deacetyldiltiazem	108882	66467	120814	106401	110188	118321	89009	56082	98246	98900	107050	110941	117388	112044	119757	112488	86416	115214	99825	79499	105563	124072	140508	91126	81119	122063	132631	78597	103941	156047	101550	102698	122883	46392	126490	90770	112498	93389	48207	105158	109532
> limit Esi+ 3.5059986	96837	106077	96007	94345	78458	116655	92708	99642	114737	90092	105303	108516	126668	89973	97294	130226	96993	109466	129468	118091	113625	101442	102891	103140	96274	93747	88736	105457	120555	110676	105554	122547	93927	121612	100333	106779	102806	124805	64915	102509	111949
MK826	37490	23872	52079	22021	21087	18626	32447	27285	39710	18222	35906	24217	23345	18024	26118	52908	12821	22611	68379	40290	36109	69427	18451	15013	39939	25589	37109	100286	16467	19277	34533	44445	71213	52893	60104	30248	15312	47617	15863	12196	34486
C9 H22 N2 O2	33650	131996	66875	36179	70461	66724	122111	93611	47299	70954	62351	60386	74642	97136	120613	88566	23693	86431	90407	75705	56398	66957	69202	49470	40507	66100	142389	107283	68015	51924	26411	48203	35417	38335	77742	135979	138956	75616	62138	52757	27914
C23 H49 N5 S	100834	81807	92874	68766	78727	77882	97113	70118	74827	79037	68791	83323	72315	85610	87972	65405	87441	81876	82640	69678	75446	72769	93537	89866	76532	105275	81425	64205	83648	109024	60489	58413	75684	85926	76548	67633	95990	60863	77798	77268	53798
XE991	76922	55420	60514	84246	58830	86192	90972	75751	116405	64645	85690	89483	93249	76136	95349	98725	55578	86277	110018	113529	85279	82047	103929	73710	80480	42124	63749	130907	74183	85866	80749	94082	84924	135705	85377	125157	89536	98724	52375	80800	90754
C39 H85 N9 O4	78144	43000	84006	97362	26086	125874	80144	64500	76883	82466	88819	109847	96792	107274	87428	92397	77952	89794	71474	75206	85658	38129	105020	123304	89313	78318	87614	74829	78125	126042	84082	79973	68101	56098	79148	63934	112587	101048	10625	127370	91721
2-amino-8-oxo-9,10-epoxy-decanoic acid	104656	99282	92471	110477	99278	101217	98823	99356	105480	97432	98009	94283	99208	103735	100878	100237	77951	92828	97690	93504	100997	100062	99028	106526	91703	94987	96664	91790	90432	88071	97153	83532	102273	98961	100995	111559	98929	95809	66361	83152	92248
Cassaidine	137528	123941	117105	129531	119067	114874	148443	103457	142453	120101	139969	107369	101246	93191	108053	92927	123793	132681	125383	148663	131367	126192	117773	112620	122140	110940	106205	107256	119625	101494	119488	120775	110505	129182	106493	129157	93098	122785	109119	116060	141493
C33 H36 N3	95390	109372	111536	104394	105364	98363	126142	98054	141477	97357	148220	98796	96486	187010	94798	97979	90461	102552	91755	118650	99241	92703	102877	95081	102450	58237	120144	91559	110829	100683	110123	97363	101358	92575	89032	92495	89738	88834	100343	50651	86793
3-ketosphingosine	112756	111506	104189	104915	107494	108059	109497	121309	120880	94435	102764	108872	122414	105876	111592	106943	101496	127340	115343	127455	117843	101154	115516	102135	94003	98034	99607	118677	102671	101771	104616	99706	103709	108096	124038	104954	94846	97225	100502	106304	99367
C24 H17 N18 O3 S	128422	112779	129425	136781	110513	123161	131221	130092	121557	129477	125812	122192	137599	123396	122553	130128	128244	137938	130856	130690	131344	84398	125954	129220	121598	127455	122386	142894	125118	127949	125725	123551	126840	129430	125196	140187	120361	124498	93006	125112	123483
C21 H51 Cl N9	114702	97601	119077	117685	96758	84116	111245	88104	98249	129759	117271	109225	95077	103694	106771	119005	110103	92282	112262	104991	97286	96107	114947	82411	94084	72030	90819	145611	64458	79694	98562	96139	94293	91653	104210	134882	80550	103646	78052	55582	121084
C8 H14 O	82827	56768	64983	71469	62684	69685	71589	71634	68748	67593	78382	63387	51420	73981	66486	79304	54986	65002	72765	69724	90642	69613	77474	47036	68247	67166	81613	73513	73440	65448	81960	63452	65741	77615	74835	89664	65593	78111	50432	64650	94738
C25 H47 N O4 Esi+ 2.981001	70886	14606	125456	66451	44284	155963	100857	28014	43089	45646	65498	131231	98002	101974	133252	38000	40612	70386	26196	41646	43542	110019	116368	65053	8147	44144	88141	49001	32833	44073	61884	2697	73354	47383	104834	73356	144700	39458	11663	45178	50197
C10 H9 N O5	54631	44198	49220	81224	46158	12086	71673	56661	83291	95090	54883	20341	45120	6691	37056	123780	58617	19346	124736	75061	53765	125370	18027	3492	86402	44728	42279	117625	28531	11388	51508	69131	51911	90011	60955	67915	14850	55644	34099	8259	55968
FAPy-adenine Esi+ 7.541995	74185	47554	89058	102287	70848	102799	83580	71418	108460	92912	70371	116994	105735	77970	96463	112786	88470	68569	153064	79674	79895	117484	92642	99766	97517	72001	112648	172280	63624	85056	107473	96526	133978	123105	121035	112881	101110	132797	43204	94078	113198
C8 H24 N9	79708	87281	85226	85387	87031	88761	86101	82854	52561	86173	74811	86278	93766	98843	95347	82792	88824	81467	87551	73006	78555	83320	85724	87427	74555	83563	74235	90788	100319	72546	71699	77639	82859	74853	95883	79966	75927	91429	68258	72942	84807
C23 H24 N14 O11 S	93798	57615	106859	101203	45192	103056	99402	68735	81065	90143	95028	112726	94832	84697	96859	127344	93407	93680	122757	91480	99622	73586	105919	99728	103315	65727	87914	144891	76613	108698	93002	97062	95683	82470	101588	100186	94339	108108	31513	101262	95560
Inosine Esi+ 8.160003	65855	32601	105703	99192	39747	39640	61537	38218	51947	87082	74081	78978	95741	51620	79222	96241	79605	72488	118571	64055	72683	132531	88626	72752	89219	49613	81656	143965	59042	94892	75782	94718	111218	55397	108079	46638	82022	129967	5034	69657	83367
C21 H26 N6 O15 Esi+ 8.329001	145560	112807	149940	223127	122461	242622	187630	116627	126990	186804	179380	239884	92016	212720	251631	197161	181707	121221	122423	145251	176144	219234	262250	183533	152580	199091	169552	146292	77653	165637	173506	114346	143098	88916	141781	195055	239929	201288	69908	159565	175163
> limit Esi+ 6.1049986	39598	40959	88930	73558	20559	42595	110298	45808	70980	63534	63994	43046	60175	27603	86339	87042	36518	49645	123987	81134	58560	149898	59491	26855	40290	53857	69819	101174	30099	49687	57885	55427	101745	33443	84525	79783	29710	95863	15897	37351	58500
1'-Hydroxy-?-carotene glucoside	106149	116500	107481	105584	114440	96560	106852	116064	100495	116201	114262	102315	93187	108936	101014	103922	114703	100291	89853	101183	110196	100249	98196	103088	117492	119178	110989	95786	111041	102038	111224	110100	105253	108020	107328	102679	101612	98866	102613	100742	108413
C9 H18 N4 O7	136015	72588	173366	134352	74439	147541	104186	65183	126592	111890	137369	140051	148936	138457	162939	139014	98258	150138	144947	100691	129252	123520	151591	108187	88516	98911	117168	110449	128279	154357	130659	135693	166680	51247	172613	114302	103397	125688	34465	126361	118528
N?-Acetyl-L-arginine	41642	26699	45657	47321	17076	20774	77114	30985	46104	68092	42821	30991	17126	14851	19601	54021	48936	21658	80573	77061	32965	130051	27003	16927	29063	15249	17811	98268	14174	19037	33294	42376	60868	57625	43163	62392	13487	32116	19818	16925	32689
MG(0:0/18:2(9Z,12Z)/0:0)	69833	70085	51148	77214	35901	51879	101788	76484	112420	55338	65885	58454	54474	32760	55245	59385	46159	59099	94153	106956	67033	64543	44286	35837	53127	34848	58055	85119	33606	47614	60411	47614	69804	113220	69544	82988	37384	64007	35847	48451	58861
C22 H7 N9 O15	94982	117856	86400	87590	131192	75904	86106	105180	77360	102816	87312	77559	52907	97411	79319	75659	98167	74305	59824	77745	81919	73011	63845	79336	117838	115214	92123	57623	82227	69035	74537	86156	74706	91973	83657	79383	72560	71530	557512	78677	87625
PE(15:0/16:0)	144774	172904	59182	92221	139588	127399	130931	173516	189453	83594	140315	111969	163671	100681	133962	157014	64933	165034	141407	142556	139524	90827	107252	132375	127248	86888	84486	189625	169284	170747	134449	124204	105531	211389	107002	120927	111528	152475	99568	118555	134426
(5b,7a,12a)-2-(3-methoxyphenyl)-2-oxoethyl ester-7,12-dihydroxy-cholan-24-oic acid	66317	63512	72540	80235	58580	68173	93671	79580	94279	73405	69753	66211	67929	51940	72583	69523	73494	63855	94073	111630	73670	92457	64043	60673	58395	60213	68572	109310	54871	74654	79660	65988	94336	107789	93260	118600	71074	77656	51589	75517	82889
<none> Esi+ 7.067997	119874	119348	112153	54130	118970	60261	110391	118237	107061	118995	114373	110208	62025	117888	105800	106046	117256	67637	99420	107927	114921	64183	105992	64239	119772	118693	113465	99982	114199	106052	120271	113319	108172	109488	113458	112673	104884	102364	99701	112863	111203
> limit Esi+ 4.460999	78004	78353	24201	153260	94230	63863	187688	97375	233858	127361	74068	73711	141861	30481	97655	46776	100292	111923	122154	196156	73297	40629	96694	50417	18535	9631	12892	72147	68206	71719	66961	28452	40282	153283	44012	151521	37158	55702	26317	49672	72004
Flavin adenine dinucleotide (FAD)	117667	118068	99533	108315	116060	148878	98105	121347	77181	105433	114806	120072	73821	142081	125491	119352	135124	86177	83857	99740	119549	115805	140406	99601	96642	107560	81292	104394	99614	113859	122352	78882	78837	100537	82894	97792	146022	119546	99895	96920	120158
C19 H2 O17 S4	78890	44536	63787	73262	44464	70999	91655	45357	97870	86896	81515	88238	63268	73668	62758	83269	63935	74940	88182	70525	84629	96102	88537	50367	73504	65298	76017	91236	47261	60070	63632	61700	70403	91009	69061	89894	88780	68391	29802	55326	63704
C18 H33 N O3 S	96697	12886	30849	40602	37069	76459	57834	14822	22613	44511	95400	68736	18087	32002	31520	87481	46150	114548	63522	24231	96973	92610	36712	42676	50385	96851	69736	31944	33133	16604	86809	37776	22730	31934	17781	106578	50491	43863	26616	55674	95339
C18 H25 N	120875	132569	75668	68026	89712	66133	153757	66987	153885	120670	133529	76934	140652	85569	76965	106341	80161	124764	140706	115823	82284	141545	71829	86612	68179	142956	64967	117016	83032	132652	121857	124851	81377	119914	63799	74591	111111	123469	102573	132954	68378
> limit Esi+ 7.3210015	114970	73113	115370	128916	55412	138460	114415	97664	109822	115540	117938	126789	127544	120433	122822	115795	123579	137540	98616	118306	120786	52587	124122	136175	114183	98136	115709	106493	111396	139062	123411	104702	97659	100275	115919	119562	135544	129307	29513	134018	125024
Levofuraltadone Esi+ 9.165	98338	40154	185683	98400	35090	78232	58680	43998	40820	63281	112466	80636	109894	75119	60351	231227	71868	62264	250723	48704	108412	178424	95088	56767	157126	126646	166112	264978	73924	73175	105997	184485	193061	68466	185158	50823	99109	231858	30378	52443	107021
Carbamazepine-o-quinone	144056	142163	90717	151179	155045	185712	109257	131641	52569	123018	88009	109145	48950	148892	158169	108614	140153	93110	54293	103467	117251	98158	181238	107278	98390	79754	61431	83909	104239	97965	113958	67831	55434	106240	44510	81821	143007	90261	91843	71132	101229
Avermectin B2a aglycone	127675	140247	125800	123758	123674	128605	121691	120703	118437	132485	127885	133601	134022	124118	119192	127526	123373	126369	124934	137730	125819	133049	117624	130336	120408	123838	126405	125299	132084	119475	129334	118680	116406	119083	111087	129556	121901	123713	79994	121838	124835
L-Histidinol	126639	65622	166757	246418	93297	229515	193864	67964	78824	186961	145303	249262	86072	174432	234716	53665	172412	96897	93897	77376	117417	218124	185454	104315	62259	92853	141788	83167	58614	124590	114932	74263	155315	82781	130751	228955	243654	74635	17816	110095	113049
Xanthurenic acid Esi+ 7.433001	68023	104202	42281	36628	100822	52110	64470	96122	87916	36154	75592	40422	85146	71089	83403	45524	38946	50563	40043	79801	73167	35125	69645	18022	57739	78161	60954	51620	112140	10111	80119	47917	47681	98243	54619	60445	56349	47913	119677	2666	80297
> limit Esi+ 2.0790002	127383	143380	154801	187105	157636	203148	213966	145256	218465	184231	150262	232939	211595	134585	216703	133871	178760	170975	201551	186346	147971	146336	227310	156859	143930	118048	108000	212702	155828	165512	144658	141623	142625	204788	150251	226249	148888	166025	105547	158965	140119
DG(14:1(9Z)/16:0/0:0) Esi+ 1.4090003	93915	99614	58695	72901	91157	113782	90057	106295	117257	66846	97882	103604	155153	102414	106409	107933	54338	146098	104373	96694	95629	57495	110252	99565	86620	69198	56619	141460	122555	105053	95674	100439	74140	129730	74548	82360	99799	111282	81351	88141	102289
Gibberellin A3	123098	155633	170137	127056	201487	124162	104853	266740	132506	105838	112592	134972	141375	132648	103312	146874	169326	239168	102713	146682	127379	89343	118448	233545	233583	198098	127211	78928	261699	197793	112952	162626	130314	187375	176746	137720	132672	134506	405284	189788	187600
C19 H38 N8 O	167515	172416	159191	235884	176511	139910	194479	134799	191943	211145	141053	168633	189588	115154	202209	132700	165628	180770	167491	193017	166714	158408	157633	136317	136824	142253	140871	161940	150581	134918	120806	117269	114452	156192	155145	265050	86856	132137	90515	138354	157372
C18 H14 N O21 S	21262	82487	97297	93032	82170	82445	96038	85111	102219	90412	98911	98541	25061	83675	95933	102804	84515	74506	115745	98590	97510	106766	93937	72251	92329	10951	81037	129880	84251	91329	85961	81090	101439	98948	101211	103811	90048	24258	49476	70496	82637
C15 H24 N9 O9	83884	41764	134162	75153	36914	88942	65368	44496	36799	39711	75812	87585	42868	57024	92888	122157	42409	56077	117703	44320	70907	121536	93562	66187	72259	85775	98758	134298	33440	79416	71122	77116	90145	47107	105081	66885	87523	113915	24870	81015	73623
Carboxynorspermidine Esi+ 5.6849985	210673	212629	275179	211729	289912	209488	200611	225072	263707	264291	216106	206945	193174	216322	194219	202134	183373	182649	153352	182189	206045	256118	201232	218846	197569	296411	205039	206385	195292	217383	262078	204657	276268	189401	186710	249499	191473	175563	145032	212940	203414
PE(18:2(9Z,12Z)/18:3(6Z,9Z,12Z))	303903	223713	320045	352631	227594	307746	202604	178282	231666	244347	268306	277878	230053	415981	270076	337999	254614	217016	289489	230645	275976	379856	418322	250448	285390	315395	323394	347597	357824	275395	296656	324406	262972	359750	325000	370411	284577	302854	247627	248266	447007
C17 H40 N6 O Esi+ 1.2919999	243841	196104	208114	205072	270565	319061	340049	153384	425205	333459	232214	319175	562716	236921	351631	2908	248050	422351	237509	332127	230998	203602	429175	346396	139724	141328	161909	248713	351127	324038	239744	170112	150843	281170	177762	317658	222142	189601	116522	315401	242894
Phenylamil Esi+ 7.418	599482	470510	1020305	468434	438784	343187	500598	338196	721953	535898	595788	311557	727288	217823	477223	765876	280788	306581	1553349	670860	591839	934683	363135	258295	711821	415170	660342	1653733	405384	405505	593763	1105503	1029084	766053	847236	375608	238034	1169722	205596	200502	574784
C29 H57 N4 O4	118815	92341	168955	158964	108041	133392	156538	69340	127879	142926	131477	122266	105524	95057	105569	141367	129736	127079	143535	122136	134720	143684	112022	90762	100319	92344	119023	156596	92806	92301	119028	108339	98181	103970	106103	159412	96115	134021	68001	96861	131651
C14 H19 N3 O11 S	77803	55698	78140	115857	38381	105700	76553	59311	109043	51556	74918	89028	129257	65215	86369	91431	44681	135697	120482	94595	73342	98074	96500	104316	49803	44147	65452	123808	83069	102180	80282	69091	94045	78783	78882	82854	88130	112504	21581	97156	70500
C6 H20 N5 O3	565996	644930	468459	653702	456030	708208	436247	516210	654231	649523	523380	763999	663023	688650	671552	743461	427065	529195	611090	437028	722141	541012	666906	730860	381541	332740	518693	586091	637049	728429	728037	658366	696767	672504	616114	510610	695154	651666	376784	728011	711769
Uridine diphosphate-N-acetylglucosamine	81459	59187	98900	94270	70034	70795	92993	61712	84576	75839	81449	79905	74029	64142	83529	97423	69978	61758	107535	74099	82575	107474	75976	58177	76017	68154	86249	128976	52847	61753	78538	80116	106481	86439	107539	102453	70172	91073	41758	53986	78133
Guanosine diphosphate adenosine	346487	334594	358430	321992	324754	338645	299727	339835	287486	315640	349342	336458	297608	357963	320461	349265	310584	321263	306038	291336	342466	334378	317745	354494	351757	369704	345647	344958	335084	341284	338035	352171	337610	305809	340534	311840	338127	333103	304943	386573	384638
PIP(18:1(9Z)/18:1(9Z))	80323	60938	60251	49922	21268	41515	103682	86077	134310	80530	46175	77965	80955	29679	31436	70886	51434	81154	138590	148622	75177	80582	34061	24041	93852	52351	69801	99397	15637	39963	72386	38632	89371	112010	87208	62377	42194	61605	35591	38667	76352
DG(16:0/18:3(6Z,9Z,12Z)/0:0) Esi+ 4.7270007	117623	116509	147623	140653	135162	137478	148706	132476	117072	129208	114933	127774	102394	138999	136261	128292	131875	105694	127326	121593	111947	148057	139981	95541	122373	120408	129970	152598	106191	84481	131347	124667	132660	127099	135276	138250	140790	132391	101899	96979	112438
C19 H37 N6	184770	157916	137731	270834	178879	135638	158396	129626	171971	151189	157414	149970	180134	188106	322041	154117	131204	200659	154913	140974	144684	139478	129506	142131	138257	158023	193453	161826	160630	147051	180202	161572	134241	119836	146866	190131	147692	157672	100441	174244	152430
C34 H61 N3 O2	84015	65981	93744	96428	96362	103661	149013	47722	83707	112509	80560	76981	91166	43551	80609	84620	78599	61119	109193	95517	67328	122574	85408	65436	64864	70297	66811	123282	60637	67689	78580	58664	94102	90484	70647	127402	58339	95209	46794	64508	68245
C11 H10 N	67217	55102	63969	60733	63341	47405	73287	48267	54272	56411	83225	84439	75493	58745	60501	55801	57261	72779	60110	59271	61271	56250	54013	49765	64502	47260	63841	41961	60946	64454	58216	51772	44282	62985	38522	44470	43036	50546	42480	58308	53600
C39 H58 N3 O9	135570	132128	132628	137734	134951	131579	128917	131100	132116	136091	134390	131301	127163	134820	131545	120558	129138	126657	122384	131136	135234	124113	133835	128220	129023	130016	132250	117358	136813	127136	136227	128031	126887	125560	127878	133060	119485	114794	96309	126074	132344
Rhododendrin	115436	147085	135669	101630	56555	102609	192154	210302	255456	66445	140668	73593	186178	51028	81069	189585	49713	191929	205696	264763	152459	168541	140320	144005	166246	127532	149811	196098	168450	182839	157448	167333	159248	247963	161598	197605	113934	179113	110897	200047	170435
D-Proline Esi+ 9.114999	101809	83352	126683	135115	75701	98002	106943	122965	107051	105338	103561	91151	92750	69957	97869	124056	92683	74727	138498	135886	99193	168829	107061	94312	94641	89168	101798	155475	68513	96850	109197	34233	130837	110319	134716	115348	100077	117890	143872	83006	103727
alpha-Allokainic acid	54645	109847	37094	74884	94123	34863	64768	114087	47695	61860	53492	29817	31128	8284	45301	128062	53134	23647	118960	121042	64461	40753	25241	12225	54403	26429	26244	117115	25480	51893	49590	79065	35376	172709	61346	60964	32063	48413	68140	17465	47420
TG(16:1(9Z)/18:0/18:1(11Z))[iso6]	74043	69136	52268	78668	61526	53620	73480	119657	122175	67188	75268	57371	74073	84169	59685	110816	49238	67311	78397	108241	74529	54710	52751	47405	50447	35388	68042	73205	50825	49120	73998	60189	69442	85307	53184	70135	83584	86461	43569	78437	77571
Anopterine	167366	163179	76381	127643	126884	98292	150458	179434	242419	186124	159882	134521	120239	116418	121433	65489	139658	193727	94771	265163	150807	158883	108012	131723	63770	95722	118871	99122	113425	95510	151375	96116	165792	140187	178281	143854	78185	128047	86541	88232	104902
C3 H12 N4 O S	101591	27004	97032	69073	55029	77025	73470	48688	61042	65915	83928	62002	127561	54329	112939	146926	48567	103616	139494	77449	66763	138571	112655	69597	112111	31697	74334	197040	69651	111628	74918	71555	148235	103682	112504	79851	111057	101638	15155	56661	65202
Ampalex Esi+ 8.274997	288582	204484	261702	257721	215020	238845	344836	162502	276861	383680	312313	284579	502606	155430	384784	408261	242518	458539	638282	379582	303195	338239	382948	251345	350505	207806	224590	396367	392072	314866	299751	306167	261122	238669	255554	269032	167188	435941	54270	200382	298713
C24 H41 N3 O18	36559	20835	47765	32363	15681	29259	52368	33806	42112	16740	44925	29196	68059	19172	48457	86063	12370	41631	139045	58180	47192	81654	35988	36965	50663	25700	43602	152412	40045	54958	50154	76973	73190	51770	66706	48970	27003	117694	6498	56193	55892
LysoPE(0:0/20:0) Esi+ 1.6819994	71940	71020	60966	186145	76292	83157	120885	87598	83712	167592	75098	82146	50339	46476	79041	67877	164449	59478	94346	115227	71975	88309	85676	62817	33055	22252	52741	36747	30515	94264	69848	51106	51308	57973	61124	145584	64336	97727	40779	83093	67672
N3'-Acetyltobramycin	115996	95148	70296	141809	104072	72589	175038	123645	135890	121508	119222	99729	75446	29810	61800	67797	105785	100473	179211	199896	144866	163467	101988	64197	117881	33381	67844	136173	115520	82845	68265	67988	161206	144468	138890	141203	30150	128359	46818	92744	132611
C24 H34 N8 O3	75660	76770	27004	87623	82234	49257	154870	102279	153187	96311	86651	78894	83066	43027	68557	38624	78949	77766	80871	134315	73860	45366	65416	56712	42823	16802	48009	44143	60403	59164	75469	51109	53019	140645	54787	129521	19497	54710	15833	62549	81160
Levofuraltadone Esi+ 7.9979978	49907	19906	86870	49460	22026	37499	59840	22277	41656	43875	53819	29772	107529	26112	51873	80648	28320	54979	137670	58831	56968	84688	51035	44547	45139	30241	55078	121053	59363	59503	56413	87066	91169	55526	70159	60733	33817	123107	8642	34153	55258
C41 H84 N7 O S	121227	107328	83476	118450	101789	100728	124193	116376	123900	115258	116785	88490	106585	94224	106184	108529	99411	107492	108298	144991	109599	110328	90495	75899	67849	75716	101339	82416	93531	85816	111322	85635	105454	101478	79322	120746	120445	91120	64842	109421	121501
> limit Esi+ 7.0090017	126675	120325	116152	122884	130298	112669	113089	132475	111198	124079	132035	116561	111373	124499	116659	120481	121800	120746	106310	117981	125710	114647	113696	126885	122400	135031	118356	121785	124833	115879	125250	124069	118121	122383	116638	133061	112716	116771	112060	114219	125908
DG(O-16:0/18:1(9Z))	124473	177530	117674	126737	179325	159096	116705	120138	140942	123356	135849	167782	150128	148840	142359	139533	154558	177655	116344	158582	117754	121611	118005	152862	127727	114055	97581	117504	156460	140491	143444	133640	134116	134587	95251	112713	118430	149356	126729	133260	130925
N-Succinyl-2-amino-6-ketopimelate	56949	54822	30749	71112	63199	139544	50137	58593	17266	62491	54664	59621	17327	123572	111517	75952	100050	33648	20294	49018	55186	52286	127988	47812	38074	38578	13232	30572	48339	58352	58323	20312	13643	49863	12908	34562	136491	54613	56099	25354	58818
C23 H24 N3 O18	83314	51005	108844	129114	35739	157044	83246	57665	155469	51526	78837	129789	133012	64995	90656	100369	39132	108257	122143	104268	82565	103181	145048	158694	50069	39219	70196	132176	130750	146489	80264	103482	91343	116664	106948	118040	132779	151585	19501	98360	112440
C35 H20 N10 O10	47545	39085	54226	39562	38989	30470	37322	38695	75359	32481	51277	29577	35788	22713	31367	69695	24909	22865	102055	56592	50272	67375	27675	22407	48841	32190	48626	119412	25898	29883	48787	67746	63722	69497	68344	35803	27193	81618	25498	25293	51696
4-Hydroxydebrisoquine	21271	107376	9187	55374	76745	23857	51718	84321	58836	59592	29593	18067	18941	6513	24158	122593	26613	23111	45759	116018	22440	9064	20380	13974	47361	4655	18324	147945	19059	23624	32315	52971	34831	157656	23335	29223	10297	30806	34435	25182	34627
Inosine Esi+ 5.235	182022	155245	201869	163433	154881	202845	137343	149394	135693	131245	171664	177259	149748	187549	168600	189412	153897	160068	137870	146073	169673	256285	178311	186205	187917	183959	193312	187536	170083	189680	164642	204318	191441	128334	184024	158121	206708	200737	143353	199065	165135
C5 H7 N5 O S	136693	95001	147857	175837	84282	158298	155283	86738	185607	136822	134593	122150	134935	123270	118355	154365	113816	112896	177104	160935	139967	150866	112873	97593	109251	98021	126485	206896	88640	143206	132643	143134	141803	146326	145054	133143	148727	128925	47651	133080	131673
> limit Esi+ 1.264	106502	101691	80919	102283	72002	66013	90294	78415	135082	91006	92034	69598	116109	50293	79045	52276	84118	113772	93860	115564	81491	142613	71960	90261	97119	71526	45004	75792	137364	109710	80704	102612	75439	103562	70698	95412	51701	69693	94662	107487	86613
C36 H65 N8 O	193334	165328	270163	279538	236565	181283	258907	140669	199151	242424	179732	192723	202750	165463	191260	170771	243986	159255	204985	217501	185617	217843	202704	144834	168354	174128	202093	220025	163339	149141	181200	156098	210319	227084	209808	286292	142043	181365	125778	126976	177288
C15 H21 O11 Esi+ 8.071003	397316	239992	158286	824022	567819	246404	679581	257124	808565	1054918	401487	307557	952039	160471	698386	164547	606279	848310	473938	900573	401238	345644	409026	175542	192901	124670	126139	274230	605931	216875	398756	172514	197132	491352	192156	678522	244822	185839	129808	182156	403912
Maltohexaose Esi+ 9.605996	78618	37583	156631	54836	23399	29018	70219	37146	28072	44427	83031	34535	68528	19560	93213	199727	44408	44387	162079	44113	77474	204054	43490	56101	103134	140073	157877	189413	46273	69335	70552	119572	165441	67260	152430	64412	105826	202776	21508	187394	80212
Gatifloxacin	133086	79687	89544	49173	42177	81400	64309	94362	78149	100991	45435	34981	46452	41899	32278	86428	64887	73734	107154	86907	49564	43960	30237	56432	109285	61519	79521	257388	69278	47242	120805	67897	54272	109399	61585	152702	24678	43215	71516	66026	130169
Fructoselysine	49967	32467	83409	87111	44230	55010	87845	43361	69719	105175	67733	54631	74582	20511	61746	74422	64863	42612	88763	85142	65236	109597	61977	34190	56157	43255	60644	149851	40108	59959	65015	58584	86074	80153	71018	114482	54554	79480	15888	36618	76800
PIP(18:1(11Z)/16:0)	45210	51543	43971	70451	40127	41797	118945	73077	115194	61535	56088	69414	58572	30598	48825	17493	58775	50851	46550	142886	43773	33454	51891	21085	35263	23730	25987	34388	14436	33676	53725	15170	48256	105931	46849	96024	19669	20569	33439	33558	48611
Stigmatellin Y Esi+ 2.4459994	112986	121878	108594	181774	119109	56170	184626	128681	165387	156042	121899	73199	97615	53335	112400	93209	136670	73698	96787	175049	103274	107724	97406	52853	81644	67862	59930	118284	88650	92337	82221	81285	99505	140161	88215	180078	61557	66724	73335	52753	112717
Carboxynorspermidine Esi+ 6.216998	356114	326605	326525	422570	325793	421899	366120	355905	444255	397745	404287	408213	429391	287327	394861	451367	396582	291979	410240	434263	428794	553994	423732	423866	410749	355924	386372	485581	357900	446670	439867	563781	406782	426550	414206	457458	446863	478398	315117	463847	429410
> limit Esi+ 4.4570003	83809	77087	45355	180084	91258	67269	209914	93569	282354	145343	81831	75372	154375	24356	94032	68435	90082	94221	191855	226985	83636	78288	86762	42902	40240	13270	40156	105853	58027	62899	73261	44129	69442	163645	60904	166757	26739	73458	22613	45067	76822
> limit Esi+ 1.1959994	124523	27610	30005	37473	21709	46189	33682	17251	60755	2827	110432	27131	17572	14171	19133	44482	19311	29025	36697	21975	138663	24173	21195	23297	16454	62611	28115	45688	29052	24435	149454	25310	20300	26008	2423	25547	18879	37914	32618	24902	169805
> limit Esi+ 6.078002	83004	54953	80378	103946	65328	46690	164682	69012	109358	78394	75838	64195	102587	36473	114509	87890	52537	92765	137982	118009	77651	125340	86224	43800	64589	42046	60812	109219	45336	71608	75982	58164	99440	95161	86268	119393	41841	103700	18472	53194	73865
C8 H20 N3 O3	63088	107919	88046	76488	94029	75119	98524	94808	73037	94741	71054	80159	89188	97252	75180	95495	90092	95013	77366	83074	82527	99838	88380	94093	81356	95501	94292	82903	96297	102782	73632	92252	95236	92105	88345	90651	92159	101938	86129	93048	75252
<none> Esi+ 7.1040025	88751	43064	77462	97151	33630	113966	74440	61015	102294	47082	84947	95575	146880	59958	95586	107311	41931	111547	125812	106431	88020	109258	112477	118855	44335	40833	80568	140383	86540	112149	84994	69223	99865	69601	85176	95131	91606	124011	18045	104178	68191
(R)-3-(4-Hydroxyphenyl)lactate	81624	107977	51221	101283	63700	22736	82650	98739	81742	118026	82836	44526	33377	13790	40286	131658	92216	39067	107462	109521	78267	86072	18062	26370	149455	107664	60123	78571	36760	17897	75783	118356	56339	78392	42363	137883	26172	76895	91513	32756	75204
DG(14:1(9Z)/18:1(9Z)/0:0) Esi+ 4.755001	109421	130552	99381	74165	107937	109863	108995	110976	118646	89785	112293	120869	131746	120232	155346	151829	82761	124802	140624	124310	110893	94846	120722	115026	113486	80170	95003	179509	117957	110535	118141	117527	84432	146625	115729	111912	107632	125454	95330	86103	93996
Fruticosonine	148194	46271	149358	49206	96093	76637	64590	20702	70512	104609	128692	51100	67156	29190	90575	156356	71389	41423	149412	74811	132568	182355	57739	58364	141345	138065	100989	123873	111423	86782	81317	117968	106765	56455	152296	50582	45606	114423	55148	45601	68392
> limit Esi+ 4.425999	61735	67427	22538	138606	86559	57466	142981	79723	194647	111591	67882	62866	139332	22871	76707	35425	83339	90612	107458	164682	60938	33498	82013	32985	16913	4238	15047	60142	68335	64578	54165	22154	34745	126600	33844	148615	28399	50839	21443	35227	60530
Naptalam	89515	57118	75119	118497	58021	144243	88993	68533	89516	116338	87008	137775	80483	100993	92029	70871	107712	102107	78343	96838	80325	91727	133728	97305	53746	50779	62642	76524	68636	95461	84576	66241	68575	70841	71268	90947	111551	82339	33734	96814	86250
Kasugamycin	171964	92691	261542	106407	74404	136506	150689	89820	87296	79135	149872	134352	90596	118298	207372	295874	65856	105813	225476	97122	150768	323387	157910	124123	223043	224983	229888	283060	71929	144996	159089	184905	241142	103130	244617	136567	142601	308004	54656	121433	160361
C15 H21 N5	107548	72544	105546	93064	93911	64432	110962	106435	116429	90866	107030	103497	96133	86848	94668	101007	76089	87959	93157	100977	85967	93594	102301	96269	97999	95386	91482	107231	104702	105064	102932	83305	87239	101649	86838	83977	103285	89239	92732	95896	81945
> limit Esi+ 4.358001	116606	106108	83936	258278	118720	47789	112546	59228	288379	197973	67745	60295	205964	29797	133147	119396	132660	85786	271628	160313	127882	149401	141541	35754	32745	17507	66091	149477	62410	59848	102173	65128	54432	110491	100638	229927	29978	65784	14771	36021	123384
C43 H79 N4 S	126430	229993	132556	144533	317110	161510	225990	206397	209761	193992	128855	209863	238831	184039	174651	347024	213587	249241	153843	218603	127091	151542	214261	223383	285608	283384	226811	122094	282663	247240	116552	214355	217087	220331	225214	246701	222858	224253	218097	217487	158841
PI(16:2(9Z,12Z)/16:0)	100849	102067	85608	68274	84936	106927	84389	92908	119091	89882	103258	114949	123573	110822	114189	126423	64785	114957	119793	94755	100271	91337	110872	91922	111111	76272	84578	162427	103470	98194	101974	122237	91377	116257	103619	87852	107057	117213	76332	80206	90927
Phenkapton	138314	150305	129888	137165	146917	136752	129235	142020	136166	132048	129030	133846	125476	137120	128808	115463	139183	134467	114957	134836	130738	119206	132433	131574	132680	131085	128258	112178	131310	121675	125177	120379	120549	131076	113425	122014	135024	113751	146462	127915	129074
D-Biotin	51612	30105	104678	37130	37741	13932	82662	38377	40787	35469	58186	41871	36519	30665	71668	110685	28299	46640	115286	65299	57820	124293	33574	18023	87233	54450	76756	147703	31878	32694	59274	81713	118520	77530	101934	95539	15708	54382	29000	27320	65714
C36 H60 S	94649	71106	135093	140543	60848	136104	137871	64130	95125	134911	87175	97459	79598	67685	103255	126902	116802	72208	138291	109994	86945	169151	89263	80799	87234	64682	100526	129035	49697	110469	77767	93332	101834	95599	95950	134042	75884	124343	48515	106119	88043
Flecainide Esi+ 7.708005	78235	18174	136719	31867	13946	86637	36212	23015	19386	15988	72098	74331	31299	58868	99906	181862	17819	29932	146291	21128	71077	179493	87430	60256	112788	81976	108994	191779	28343	78626	70405	87157	123396	21705	118875	29956	83646	175509	6787	69164	68607
dTDP-D-mycaminose	146116	143393	117439	138247	141070	151979	129619	136454	115308	134471	133024	142921	114326	148450	147101	131429	148090	121573	114135	126383	139786	136132	151342	123093	116887	107923	94249	124497	120911	135611	135648	101408	98793	135710	96390	128039	148559	131382	99543	103965	135370
O-Phosphorylethanolamine Esi+ 9.533998	633489	269183	574015	719317	265480	534861	620982	388284	547171	480735	705527	609343	453984	352038	320594	610150	385987	632060	901628	975438	507633	1030097	314936	529580	886233	414005	412776	1529205	280479	554262	733153	1084335	702041	814678	852886	869152	478449	1164714	368113	620632	673010
Azinphos-ethyl	92747	87466	117629	288676	68118	323409	106109	86068	69969	61186	93365	67926	403294	58026	77691	125341	57143	71020	126380	92516	86810	107239	72592	39978	112038	69800	91542	166351	70263	329496	88706	96298	121545	106157	110452	120416	288103	83662	81695	46279	85731
> limit Esi+ 1.6320001	476051	318630	718186	482212	287810	426160	369429	348388	307243	460032	453358	373639	321641	348901	387363	628594	419680	264177	535772	346957	476255	796425	346736	335316	573868	728828	618671	626769	293033	383230	454052	478254	646736	310020	676000	358119	404414	555292	236032	353768	439717
MG(0:0/16:1(9Z)/0:0)	138816	111447	59209	128973	123398	121566	195261	149257	239884	56693	134038	138308	190433	103118	138245	69790	34783	151049	163119	172478	136338	84619	123102	107875	93661	25373	62919	152579	109218	112866	135805	98889	120084	225635	120098	156969	102822	94054	33518	105711	122268
C35 H63 N7 O Esi+ 1.2270002	102897	139634	129637	160812	135017	107823	181186	111650	201852	148236	99331	170904	137658	120710	99418	98720	232576	93879	128930	142292	105392	130542	197257	110227	94448	87922	103567	246061	184488	99927	310692	87839	101159	155179	103565	155561	83669	200914	107326	157783	195051
C42 H16	80967	33402	38623	40288	28337	41149	43473	38151	37836	38299	74732	39333	36393	32440	37918	41270	32640	33100	46311	39603	98324	42507	42890	49377	31068	37579	32970	49366	36861	30474	126317	33541	35570	40808	34941	40358	39729	48594	28274	40750	175785
C19 H23 N10 O12 S	58949	47812	65317	47715	42530	35364	42297	40631	89987	36225	60843	33151	39867	21660	35993	81842	27521	24290	123803	68621	59634	80805	28498	23307	53260	36158	56008	145508	25728	28976	56743	82221	74492	81069	82759	38632	26548	96283	23768	24263	58494
PE(22:0/P-18:1(9Z))	244246	222879	218398	179188	201700	232896	190665	227616	180435	188299	227719	245745	223799	269749	234286	209479	209302	248783	267922	190787	212150	232605	250340	271553	252772	213980	211241	274490	239319	250576	224429	259902	217309	213761	225366	192375	244759	272394	210263	245264	226385
C29 H63 N3 O4	100130	107211	78481	142735	104517	77240	170409	106426	170887	118769	83313	82047	106004	57069	99064	57740	72465	93950	109497	154733	87353	61577	89738	44974	61020	36403	58758	90026	83402	80350	81599	46858	60260	155225	76780	167788	48404	75500	77054	65750	90040
LysoPE(20:1(11Z)/0:0)	173869	228181	155799	318419	193952	194774	312074	221399	257363	316016	210926	173361	200317	120487	207403	221483	256377	199161	312886	331235	214090	198270	205045	168853	147634	85205	159510	182831	135815	218712	214769	163444	189019	300953	173984	284452	144747	238954	81559	196404	210117
Inositol cyclic phosphate	49256	30018	29363	68988	37780	172679	52774	23613	61664	38172	52175	146519	49625	97805	135087	56871	55363	24645	32587	37790	53465	74305	92325	52762	32513	24647	33337	33497	27568	72351	56319	30390	31039	56262	43339	82791	176041	47964	13311	45251	64359
C6 H16 N3 O2	75503	155247	128365	92025	116982	131594	103013	120518	108143	91440	82251	110462	171040	124741	144033	141124	124697	140010	97728	91907	96776	137406	102781	116273	126206	138311	133535	100630	127664	144808	111444	106877	121465	113045	118496	109126	133058	113452	123657	123632	108219
PE(16:1(9Z)/15:0)	149425	180007	126317	111996	107682	119955	133626	167907	156950	99434	138803	113503	132674	106983	126398	199809	103970	129351	152058	135730	151126	130988	116543	125629	168887	111074	133367	214036	130106	155574	144742	160057	147044	181641	149089	127318	124031	178767	161389	113628	147864
C23 H54 N16	203974	164152	210107	200069	187789	205996	242914	136878	262876	187669	186883	188349	235082	155365	183257	210016	174111	172714	235784	229698	183308	218591	195506	155829	180595	180118	170354	289783	161549	179575	185893	189258	218124	253682	224196	230337	149826	231808	140277	149336	183024
Bufanolide skeleton	78317	73879	109918	73590	102958	47668	73077	18610	87528	57365	68682	72015	98912	58178	66170	63369	55266	81570	82162	68531	75701	77127	116373	103124	87695	86355	47656	63293	90474	51981	60969	68454	107682	71717	92065	104612	2890	87567	24866	51133	19507
C12 H12 N	83782	48959	68605	50579	62560	55078	72971	62568	50065	54693	83549	72353	64443	57536	54654	79613	62665	75387	51457	68223	55013	56523	71721	81154	83903	113639	58753	57301	81655	50626	79572	66262	62956	82766	109112	100891	61114	68277	99071	78751	67292
DG(14:0/16:0/0:0)	111671	90149	84134	55720	88571	121130	62898	78465	89388	53425	109589	118978	173950	104483	130038	135441	43609	149336	140330	82751	109593	106523	102922	128858	134267	122399	96515	169189	170101	136991	106453	140788	114936	93271	119290	64093	104430	147986	67638	119994	102665
Nystatin A1	162775	170978	132722	149321	173076	130120	129563	178447	130347	157031	159416	136966	130844	158366	146078	155100	156112	151533	128098	155327	161562	140338	135951	160152	164604	179266	156981	156798	164266	147946	154707	160622	138088	164961	150404	167108	145602	146048	132160	146120	151920
D-Urobilin Esi+ 5.4550014	121225	328166	71896	109968	90739	107909	164422	137661	234009	77385	119738	109034	182443	78786	131005	87945	185124	142678	179273	178282	112645	115817	113079	99283	100326	70754	66852	184322	307526	99461	104463	91067	115675	224239	115033	128917	93285	115795	280753	103664	114914
C19 H17 N9 O9	79544	50261	97752	149779	57160	106312	99753	62378	53969	117315	75928	107338	34700	58507	57548	97241	120422	54055	94302	64053	72143	92117	67501	86026	84776	61964	73484	103262	21470	92756	72357	74027	76332	41897	82071	101996	92985	76849	28490	84961	70748
> limit Esi+ 1.1979994	157455	16847	19745	26320	14046	30437	26702	11747	39700	1053	118584	20368	6472	8624	16880	26507	12779	18466	25028	16604	129448	14847	18168	13736	10503	44719	16063	28257	17415	14624	139059	25999	12156	18725	925	20524	14061	27350	23005	17579	150462
C16 H37 N10 O	208096	186394	184821	207200	180964	194632	196374	184546	222552	188851	202546	195583	204551	213182	202046	189070	196219	189070	206441	225455	206650	194711	182693	176701	188107	183086	182693	197797	191174	182872	197064	178109	175480	205695	190823	187385	178606	178501	135674	184044	198000
Zanamivir	41542	21985	42986	87982	39549	58777	51851	43291	8670	116707	40779	67116	6271	51681	28959	51098	165814	44107	24832	32083	42506	36085	38816	123948	68265	61141	51777	26813	5702	91926	35795	37462	29525	16738	33084	79718	74502	35978	21774	126224	34289
C5 N O8	147290	119580	141138	165502	122191	148328	134673	121654	137836	144054	146219	146559	137071	135114	131468	147893	115660	137571	184178	150220	151381	150051	124486	133034	140716	114694	132653	182236	113545	125158	130963	134460	144633	144333	147658	153423	130847	140937	92657	126740	128867
p-Hydroxyfelbamate	115804	34876	119633	128412	35134	168769	88217	48742	71774	92775	95319	107612	128520	65837	98532	132557	84564	114258	185078	105270	94945	161893	124214	109108	109037	85683	102982	191141	82679	128630	93058	106017	150552	73526	109522	111937	111057	144064	15245	106024	85879
> limit Esi+ 6.7640038	114365	92916	125670	149131	96976	141735	134689	104310	146672	123743	120856	136120	126571	109018	127986	122558	121624	111240	161675	139272	123188	143462	133739	105480	104202	90711	113034	163176	97473	118610	122299	118468	133724	136082	134398	134215	131272	131960	65338	110752	130066
C36 H66 N10 O3	155497	290262	171430	150837	210655	125936	185671	194068	161791	165259	179410	195003	164745	143537	123604	120670	137273	170900	105745	156800	131316	174964	135372	246173	200444	228518	196432	90728	184268	159756	164951	148572	138099	134399	173820	158380	125776	145380	316590	175778	110655
ADP-D-ribose	61904	45021	45906	56737	60231	50843	64467	42023	95408	73476	61921	37444	115302	29496	55486	83734	53579	118403	154125	107475	71965	60527	56694	73526	51927	25970	32641	85249	112233	59471	62559	80768	55420	79432	49004	56517	31247	81306	31741	49700	54243
C10 H22 N6 O2	88088	65489	88524	78830	56678	110890	82084	70156	91253	68083	82975	106186	79264	89029	87175	88180	67027	80099	100871	89878	90396	91112	76442	84696	68001	65317	81703	107523	55578	85413	85305	73199	79950	105832	99614	73285	98956	89022	49072	75887	77605
C34 H64 N2 O4	129192	83148	156555	185801	116374	125213	128381	81248	207071	154707	117636	145379	114847	175663	129143	161848	162908	128739	114973	111502	104767	126598	136959	102153	102440	105924	98850	129872	388161	182182	429342	107327	104532	113627	117821	202762	188453	114238	68547	84597	102382
Pamidronate	88451	90720	86160	55861	74549	49557	63042	74835	121538	45645	87491	43078	57205	32839	52033	119606	38164	36780	155149	103277	86354	97579	41549	36637	84157	61967	86107	171308	47452	43805	90928	128338	109280	146886	119247	51758	36662	117602	71698	29863	85419
Gaboxadol	116529	101414	129866	120992	83357	125654	118611	112684	136006	89876	119841	121699	128824	110546	119748	130675	94476	95585	163493	117248	119110	123649	121954	93277	101638	67966	107864	183508	92822	115678	112980	128098	124287	124316	131206	97784	101115	137747	69068	105479	116565
C15 H39 N7 O4	125867	118844	111254	119610	93919	118493	108603	86516	124303	109212	112548	139506	147893	121888	142364	114396	124568	134894	124028	112405	106676	127367	144974	127376	122366	123737	92257	117220	119889	109422	109827	107293	133744	114514	125223	100182	103032	111279	82484	57820	106106
zeta-Carotene	128549	128827	127815	142967	110026	125179	140128	95243	236790	134893	132162	133524	162215	119548	132575	125209	112758	142582	171847	174185	120022	161174	140832	123482	123716	114193	97243	183933	112019	141562	124136	140956	120334	180498	133598	142361	87881	171804	85438	136701	116883
> limit Esi+ 7.011997 :18	159268	156442	144118	157461	181565	144018	144249	166745	141001	154241	156980	152064	130551	151144	142760	155906	147055	144488	135045	145430	155843	149336	149539	154902	176539	172297	150013	155058	145923	153975	159378	157721	144940	152592	142971	164234	142301	139145	115370	145062	156139
MID73251:6-[2,3-Dihydroxy-1-(hydroxymethyl)propyl]-1,2-dihydro-7-hydroxy-9-methoxy-cyclopenta[c][1]b	108726	163421	80944	74697	139790	79000	92758	130305	166910	68799	107107	66963	115520	76160	112558	71651	66651	72641	96767	124967	104519	75224	77968	58650	69477	73843	72418	112263	89252	56032	103045	85701	86037	192261	87908	83211	75153	76161	152423	52100	104113
> limit Esi+ 1.2379999	114163	133966	140297	149999	132112	145325	154175	125370	172323	143900	110018	143963	131709	126392	138152	110817	148700	121044	136702	150693	121873	146697	109041	131754	147207	148128	129135	141819	117180	127200	118822	111843	116415	135146	100679	121666	135687	131888	97314	116137	127767
L-Glutamate Esi+ 6.3099985	71904	73404	56212	76752	80403	22650	103670	73423	116623	83752	70513	19607	46008	14606	30621	105192	75789	50975	162723	133652	71741	68000	27994	27969	66030	35760	43440	116859	33537	35933	67198	102438	62018	109052	73166	111159	25619	103057	40430	29992	70816
Stigmatellin Y	116713	102037	92746	142784	116065	70911	185389	134629	113379	143638	121361	109001	81924	84852	107508	61126	128668	78637	102193	124232	114705	110760	114476	50938	65212	57720	100971	84520	61690	88548	118781	82619	88135	112402	84329	184986	79725	90707	94007	81406	105124
C34 H69 N8 O4	95055	80225	145852	166973	135413	188440	198223	57311	67742	168046	136766	198018	149279	130846	151997	119987	147692	134838	121357	114441	88903	138456	143379	119301	125037	190722	131011	106588	127849	77996	113518	141533	154185	92175	139127	97578	165254	175843	73958	62399	107006
> limit Esi+ 2.0960004	270506	240218	249665	381428	166518	257095	252071	283031	264388	388482	211360	232513	229313	194788	231453	233356	364492	161222	223171	221105	208681	327990	246525	239368	193257	133201	272918	245008	208700	292446	206497	192715	247737	248123	186361	287761	229798	287651	154329	272249	213677
C8 H21 N7	147633	148822	139785	98446	128257	110452	129815	133621	121616	94037	129378	107541	119574	125458	129921	146335	91818	129408	128684	124068	132223	108371	130136	129487	104397	85031	104878	142190	112825	120230	143790	122207	137803	117912	102105	120180	119003	99985	74824	134994	116167
C18 H34 N2 O2	114283	123136	125856	145913	106653	108350	125569	62984	131455	113886	108326	115403	120067	64069	95670	60473	103599	96687	132088	106232	106933	113832	138243	86390	76166	75565	85054	140521	73071	99333	99936	114779	79791	124386	96192	127110	54316	114446	65028	105533	108591
Dimethirimol Esi+ 9.402005	347689	214797	272261	240127	237884	244596	358197	312285	314504	220522	332162	228370	325756	224025	303921	430221	173107	291942	271760	300869	309886	373944	279637	262810	268615	149967	221057	226928	167482	317118	290918	342066	219339	293075	213300	243978	246273	247113	181076	268853	196648
> limit Esi+ 7.078002	166880	174023	182634	187377	146153	182476	159883	173474	155490	148929	185528	188761	165335	163888	187112	185554	147634	169413	158840	189179	160861	184698	169146	191406	150213	153933	185827	182463	189286	162581	181940	155504	180301	163320	182419	167663	183833	188134	119918	181791	178632
Benexate	49518	29860	107977	42252	13089	52452	26313	14424	6774	6009	62230	49359	24241	30479	77405	129490	6520	25788	69599	15850	30057	160796	44668	51259	58245	56237	94587	134087	25808	31897	52089	48275	112734	20477	88682	30050	58420	137588	5348	54067	59819
DG(18:3(6Z,9Z,12Z)/20:4(5Z,8Z,11Z,14Z)/0:0)	168485	207964	146877	189078	186446	172616	145864	179063	133248	162964	190305	180193	139581	165904	176533	160184	166269	156484	127026	143297	150473	172505	143435	184727	162976	178665	164015	178974	188885	136367	190815	158030	148021	163843	145669	172006	167915	168849	150831	180413	193055
C14 H35 N9 O	62467	78177	103470	84434	107420	142717	93534	42095	54309	85951	126377	130201	57987	75288	96266	155781	84726	91886	60511	80525	47047	110327	93883	102229	39786	68938	151211	103666	104610	64449	97982	57891	119738	54393	60984	173925	200915	120405	35818	71454	111183
Ferimzone	393831	405136	523226	418363	479194	430121	447667	403296	439628	426650	396267	407664	468942	410505	433316	482668	425979	349403	445096	531275	417482	433545	440410	367793	422060	399140	385067	445581	469946	399637	416913	423518	434097	443819	402168	457857	403420	448094	316686	387692	430337
> limit Esi+ 7.0980024	146082	101993	144625	152591	86872	179499	146040	108799	178699	104840	147819	133376	208521	129901	158737	176055	101835	177323	193789	166545	147164	178527	169800	175151	107551	79001	138087	209665	159919	176363	145025	143192	169390	137396	155092	158953	153347	190698	38467	161473	120868
> limit Esi+ 2.0979998	362887	309933	560738	546000	328119	406449	410582	345009	440469	393380	344518	349787	445169	389543	374899	504285	428963	386635	465670	502166	369974	693030	454265	388919	412396	538576	497892	619218	325915	357479	423502	490730	610302	323200	555967	468039	419139	523362	262222	417687	336144
Pirimicarb	61302	51038	12408	43738	52514	190411	52195	29389	56720	42434	90416	66041	21617	39752	69604	51344	60800	205277	55765	59539	59982	86466	25248	66521	35123	46711	75308	38236	98855	30542	65429	114485	27209	20614	92292	66042	46348	56081	36154	32585	61935
C25 H38 N14	414079	242652	232534	222341	243270	237413	392720	334166	382668	395814	323883	381400	386686	217345	223049	374107	222466	362122	398238	379565	231793	317930	318880	389852	219696	396622	221223	391750	366145	213414	383531	390319	212813	361581	262243	210715	122554	206614	214035	202230	206334
L-Galactose Esi+ 4.903 :17	879429	597299	494787	690898	367104	935689	735265	627780	755148	378166	902988	500980	1024705	674845	1229608	1407297	405811	683611	1188311	639319	854469	1135835	1035414	688517	967645	640691	808881	1909673	676873	944743	849215	889257	1143602	1117652	1029441	781536	1053332	604975	114065	587345	911809
C19 H41 N11 O	213177	212543	208368	220458	208989	206837	195249	174197	218993	207905	208963	216974	198008	202112	213458	184324	205060	200356	209364	211564	202631	210223	207491	180073	197671	183849	202226	189922	207456	206330	209232	205174	181302	210748	199447	209395	196008	199838	152925	204599	197226
> limit Esi+ 1.361	144726	105682	221248	125281	99929	149713	105439	93339	97541	131310	98214	138805	105371	111068	135932	202860	112312	60069	197652	116138	143318	265703	110347	116639	176490	224903	197954	214738	95368	133344	141635	156473	207750	104179	197827	104324	127186	169448	82191	112056	138516
<none> Esi+ 6.7669992	127262	104969	133466	155242	103857	149078	146727	115143	154830	136062	135158	144335	139935	116654	137842	137220	128765	120595	175284	148343	134122	156793	148166	118958	116427	98482	122476	179551	105058	123863	132050	129391	144503	143915	140317	143297	139770	141500	74061	119356	133063
C44 H48 N2 S2	180307	152696	157707	175406	153164	161601	169654	153568	165257	157617	160396	162681	157424	151458	165253	200849	141484	158544	161264	178063	168412	142965	147390	156919	160727	154799	146777	158195	159820	149062	178906	148297	146176	150734	144585	158956	144674	145229	107741	146933	163425
Enilconazole	100879	58027	116066	107626	49009	85420	92618	62029	91174	70018	88039	88609	105609	62202	102297	138223	54051	66531	159298	87584	90394	121692	86578	66177	77589	71171	82308	185994	69107	87268	87371	102978	115344	92574	110861	99600	77447	128411	18354	67335	81749
Ecgonine	36499	167833	58601	121728	73836	98295	107236	187124	116908	74454	34380	54554	117264	124729	80149	89520	118862	164163	60106	71354	30273	92357	107308	40169	51564	96027	68629	67305	132669	129670	33183	70706	62174	92525	115364	66718	65387	129787	67887	175226	31287
C8 H22 N3 O3	101587	83637	95358	82456	102524	91853	114507	53606	106518	107034	94499	96002	110030	88167	86996	51877	88806	104727	106178	148795	90153	124238	103727	88669	95196	97402	69823	96689	92282	71080	82301	87904	82018	102481	103586	132294	72319	104982	73689	92575	95793
PI(16:1(9Z)/16:0)	172697	202306	136459	119964	160178	154358	134682	176008	156737	119790	166142	182412	162811	187246	192771	159657	127485	160695	168267	163760	147549	136599	190067	165075	199083	134344	129772	190138	158384	135046	142726	161261	147499	179811	154918	126508	157720	162532	165780	124728	147948
202-791	128844	113169	48411	87573	65906	44273	113735	115845	124559	52076	81498	42057	55683	17883	44996	131233	31503	44098	144307	134097	74356	61587	31268	30222	50352	35397	38783	177095	34495	55849	125424	92371	64245	177035	70638	108508	26642	73401	74617	30618	128463
Cymarin	170640	190226	78469	145468	169067	121920	258774	211081	370118	137046	177895	151465	261297	114120	181308	101762	94947	241458	196271	342414	166576	104719	173403	121658	103343	76092	84885	174411	155203	122800	171967	107899	135921	328283	132359	215876	104578	120209	153169	127591	177693
> limit Esi+ 1.2529994	115665	114637	59307	86213	97390	92151	123163	184026	176842	76013	107925	99126	136112	123237	144947	139362	56198	103389	87714	160000	104849	72749	106504	84543	54782	62084	105884	86877	85232	97774	108613	56596	125743	138148	87327	106108	140894	98027	67346	96036	113736
C47 H83 N3 O3	69922	279586	73714	63102	166851	75673	84838	212883	117896	95692	67764	98511	143696	105848	79574	268469	93903	167229	62363	117597	58543	54273	80030	120726	283364	286551	91213	47543	338838	153645	38597	112736	77282	125565	91564	84923	99586	128436	291699	110413	43890
Valeric acid	330563	328094	196503	186326	214785	196382	131958	176228	171946	150894	164071	145611	196430	151784	154509	177827	108810	135412	169782	121451	134847	124785	96771	121067	135932	122777	129168	128591	138917	89469	112844	131726	104320	85225	114173	75646	75010	94861	88142	79397	83979
C14 H22 N7 O11 S	94922	60294	120478	86002	47119	81463	98872	71626	72429	82131	91667	101934	83810	84482	97238	133605	86760	91409	149321	85253	93171	83573	103709	71369	111642	67846	91875	178083	72382	82852	93926	101043	109613	73685	102066	100201	77342	96725	34680	82611	92612
1,2-Dimethoxy-4-[2-(2-propenyloxy)ethenyl]-benzene	85544	56629	124722	34849	33158	42290	81898	59451	56744	38017	78101	61927	60981	58315	57393	88346	32101	66222	109176	81600	89018	138674	44896	37847	91330	68050	77454	179876	38936	43622	76886	75516	160813	117761	122960	74937	37477	56048	52413	25059	80282
C22 H46 N2 S	74656	135083	34807	282734	70741	91028	162555	73904	178562	196474	75154	55389	78337	44667	66205	36294	138262	63141	54326	187183	73724	68080	79141	56027	38935	49982	25655	44049	47368	43077	77084	40766	41062	129299	43554	187604	47199	12937	59813	45738	62037
C38 H71 N11	111087	112801	153200	119333	162604	117232	192999	46208	44958	146826	98147	132727	30940	125065	126377	174121	132253	49790	83795	24613	81806	109184	126579	99370	151373	187685	164001	78998	117158	115283	76168	128035	127741	68780	114401	200194	147148	151117	65396	31815	37570
Lithocholic acid taurine conjugate	816228	877244	478830	1361442	961360	775623	1408332	947774	1722543	1167659	798960	810892	1382904	537345	999814	617408	994058	1074338	1041780	1496010	820595	610714	1001555	620856	479067	298222	431780	789273	853378	844618	777013	510801	583579	1274898	598077	1344845	573233	670403	494669	662476	811130
Carthamin	130145	72793	125829	132083	54670	199154	117743	101390	110144	125204	130873	173778	144858	165532	141933	132991	130256	136526	111531	113634	130843	70627	161108	194077	141747	127200	138903	104912	126353	195090	132472	125214	99748	89318	112397	103807	182712	151165	28408	192016	135418
1-dodecanoyl-sn-glycerol	77474	70836	96601	78134	65914	80180	109392	51531	118093	75475	81929	85333	90964	65706	80846	95638	61606	75059	120857	99780	77887	105996	77570	57180	85075	71193	81859	159173	57182	85640	82134	86716	97703	112887	99156	106383	65537	111402	45830	58921	80215
Spiramycin 1	189515	188955	173082	188552	192195	164828	175057	193456	172499	190242	215395	169846	168623	181850	169787	181334	194790	181157	180294	182639	189304	177606	176547	191002	191567	218267	177610	193995	186027	173355	191121	187588	175693	184892	168064	198232	176518	170980	179139	173305	187207
L-Galactose Esi+ 4.903	880180	591661	494787	688332	357050	936449	737851	629801	754941	378631	900952	501205	1025830	675695	1229286	1407297	404929	685155	1187357	637303	855057	1137873	1036745	690176	966596	643033	808881	1908934	676365	944753	852021	889625	1144589	1117652	1016525	779349	1054351	604975	114065	586578	912925
Dihydrozeatin Esi+ 6.6280017	130478	51177	191699	160496	115094	194463	153424	71020	60070	152194	113259	187958	73272	188742	175073	62556	193935	121876	49823	74139	125017	129311	198986	100114	65353	182563	155079	97837	99073	60295	120241	33307	150576	75635	148654	99081	172630	54154	81133	41705	110227
N1-(5-Phospho-a-D-ribosyl)-5,6-dimethylbenzimidazole	93324	52489	159375	57431	25946	84060	77774	46203	31576	40381	90013	72315	57974	61526	120444	180315	37251	53864	146532	41636	85568	187233	93562	67877	114934	112350	124384	188194	43716	73917	78647	101187	132221	44808	127473	70469	80012	179686	26926	58544	85080
C32 H55 N2 O7	303503	261885	204345	262770	117082	240700	347620	301503	316296	175800	278052	296839	222932	114448	299815	221125	326541	344901	286030	299299	136407	256542	291701	158947	156927	91405	167540	314524	88041	225259	245703	168684	258188	265216	229510	266511	147912	247192	89952	173354	266832
C21 H26 O27	290834	281512	300974	267791	276529	286372	249151	280805	239462	269593	297833	274435	261225	303358	270753	294524	266546	276463	257097	252371	288847	288945	266726	294749	300122	309707	290691	294735	285814	280964	289540	301538	107907	262838	286211	268302	283969	280064	254896	320939	325437
C12 H33 N12	57110	43158	60717	77312	50638	43283	52210	37032	32980	75071	73216	67490	91188	79331	51629	74538	86019	61158	99641	64540	63525	80028	89213	33159	53268	56215	56850	51803	59572	36822	40378	33887	60465	38119	65183	85369	78496	60315	33230	37579	52417
UK-47265 Esi+ 7.101	106555	73887	112294	116014	283333	152039	108721	82643	150423	68634	824847	1101310	186210	933926	119969	136803	62807	153220	169428	136260	108216	135727	140559	154561	71032	58506	802242	191923	127486	146717	102309	103919	832092	114573	109253	123567	122870	168483	29206	136493	105430
N6,N6-Dimethyladenosine Esi+ 6.6040025	106049	141510	78022	86843	119201	93695	93835	111537	73169	121446	92818	107055	116135	147050	94951	77245	140105	153096	70383	81350	90489	64005	108815	151871	113842	101364	82193	45719	158011	161451	94903	94463	62842	65385	61466	92322	113187	92587	121262	194507	92086
C35 H71 N3 S	104631	150917	140766	173208	169168	128994	188814	108199	141156	156647	104132	137351	95469	133728	162105	73095	133616	84168	99363	154955	96669	115972	148648	77386	93881	124839	120711	74438	83347	99987	95116	92531	120301	147861	116556	180488	103745	78521	94158	82321	93444
C40 H75 N11	266122	357029	288310	165855	368288	345900	411993	200079	264613	425958	311705	326467	300305	356563	284378	385361	244616	313246	167161	204397	222498	254111	334873	222394	356077	339885	411629	182621	325449	239246	243025	284988	278735	267155	284675	334007	395721	260656	239638	204653	240700
C35 H63 N7 O	107914	100145	134202	167047	135625	127569	185621	83799	154312	157537	106298	99082	144650	89329	118985	105791	147377	99840	135467	150487	113463	138308	118166	96239	100778	95677	109421	143682	98674	104684	94384	92735	107866	161570	109684	162443	86411	135078	90101	97523	101459
6-Oxo-1,4,5,6-tetrahydronicotinate	107062	71995	86274	90859	84008	77296	87078	70081	121583	103048	106386	67918	124970	60741	101110	129763	86337	132535	219120	166203	109734	185418	89310	106839	85588	55743	67185	166581	122469	92865	109064	136402	108898	147155	83824	87242	61906	142558	57531	97871	106171
Bismuth subsalicylate	174514	146840	178787	200957	137605	184654	179143	159975	188423	172467	159079	177815	180436	139651	178835	159992	157241	136513	187025	147514	176557	193438	165703	160537	157571	137087	170735	232337	150490	143587	163089	155936	177841	179469	156346	190906	164329	159623	92096	132481	171287
dTDP-4-amino-2,3,4,6-tetradeoxy-D-glucose	108003	72237	107307	115867	53396	189392	106725	77835	188307	72361	99864	121057	187459	91785	126508	132670	64260	145616	165970	131203	106395	139330	170755	187217	70529	62267	95100	179071	118148	146550	108668	97247	125761	136525	110027	152864	119761	197581	29130	129269	105786
PG(16:0/16:1(9Z)) Esi+ 7.0099993	193871	195513	178302	190121	232117	171238	172149	206339	169878	184107	193633	207364	173024	192685	175858	184411	180591	178501	166231	177199	186419	169932	179570	190238	224933	204322	183723	190254	186496	178152	194181	192720	174826	185810	171095	187898	166735	159120	184643	179852	192684
Pilocereine	192123	193801	181800	198773	234840	164456	172745	196611	175684	209875	197383	173592	173771	183703	178572	184161	215399	184213	159174	175696	191900	162930	177051	186731	220359	239735	179889	189281	192539	177852	195051	181416	176753	180913	172082	185982	170192	165804	181900	175079	192134
Levofuraltadone Esi+ 7.7149973 :15	620635	315133	1087811	363107	245056	511993	504884	313714	274585	232788	599953	493024	350835	429060	815084	1288577	231465	361261	868846	337638	573768	1367514	611043	474715	947248	951924	985572	1232643	270152	539328	579779	741432	1003445	382837	967789	464950	551682	1321305	209174	469083	594761
Dolastatin 10	208174	188672	173423	177519	188750	167512	178757	217256	159471	179296	184045	174235	164844	181651	172961	179849	176777	166854	161438	171836	177162	169966	177152	187655	213734	202908	197711	184001	186986	175109	211908	184477	175040	181512	167151	188273	162714	156665	142778	174484	191187
<none> Esi+ 7.0129995	193705	176033	167176	177498	199978	153275	151983	188037	148095	168612	190341	178969	164529	173966	174408	165036	172538	157237	152606	164937	161954	163614	155232	190075	180295	209247	176871	187134	171791	169137	180588	172126	165848	175473	157360	167349	154194	157287	192318	154255	167999
PE(20:2(11Z,14Z)/18:2(9Z,12Z))	164311	125654	206401	141218	139011	149445	125965	114892	114293	139717	149856	158645	136124	142573	160044	169682	150421	131852	192896	127736	136574	178744	153011	148558	175488	192779	187113	192187	136054	135385	147985	177659	182593	115019	180011	118055	144691	160948	90531	139988	156490
Mannopine	70255	40204	99878	74700	33385	97946	83814	28475	64257	96357	74603	96280	182758	78105	129334	81972	50536	84332	117929	81762	84279	101112	98586	96356	93752	56145	98119	85897	78535	138396	88575	122193	119578	52165	91668	77608	95639	134962	5065	87587	85612
C39 H62 O2	279122	267218	294559	325551	254113	268448	299513	228209	293689	316189	247519	263640	276583	254630	269485	247926	287032	254987	283621	290492	253369	295115	258004	229273	263148	260987	265034	286833	246628	251966	268327	242443	282437	278245	272819	281455	242111	279187	169501	260147	245098
C22 H25 N6 O17	96271	63650	106528	146354	40170	185563	94392	64288	141206	61547	99195	149548	191262	83267	152304	163828	48187	153674	174861	119093	99888	150222	129756	134543	61096	58708	95088	194433	108440	135153	95953	114200	118171	91143	131079	144161	161207	190775	20993	148625	92968
C15 H27 N O2	136713	183258	154419	162020	180964	133800	199369	151187	200528	149761	142822	156782	186701	149555	177068	168744	144169	173067	212418	192696	137588	211528	151845	149275	168178	165810	202932	192596	173282	164970	141406	171993	159314	178531	160128	207064	130564	189846	131748	135441	136779
> limit Esi+ 4.7270007	174709	157823	177262	181727	175208	154426	184012	130809	165523	157534	162270	180341	149855	138221	185597	243638	148669	125594	179433	155669	157008	176137	164220	109783	147462	157377	168248	202103	125636	120089	141976	157867	175434	163023	181005	201821	136207	146576	87265	116891	135133
> limit Esi+ 4.3939986	145396	84386	79133	324352	175203	63410	157840	96999	289447	147286	145470	70180	284237	36517	98980	101510	182211	211509	312536	236491	144150	115955	97328	81256	66968	18039	61241	192248	125310	123577	80207	66560	101713	143519	80928	291054	38120	141650	40854	86424	139482
C36 H59 N2 O3	218787	165157	159523	242395	192825	248663	231086	170813	186093	174896	200537	164464	182807	176015	172225	179936	171428	187388	166452	176961	174985	164184	216024	156484	160595	165850	217056	154682	159968	150723	176920	156111	220421	167036	210266	237038	170003	167868	114165	163171	204865
> limit Esi+ 1.2509997	121452	112378	82742	94385	96056	83247	126559	170403	177781	82714	120392	90213	129848	104530	104785	202847	56872	93183	124766	162107	118088	92582	81237	71183	86989	70543	133787	154577	81830	92086	119004	76783	159073	141744	113020	115907	129261	131837	65888	88839	124209
C32 H49 N3	129486	145290	129812	102211	125288	108347	165849	102130	231519	150340	127600	124204	150106	114582	112580	137597	109116	143209	170622	166226	129034	126965	118047	106278	133336	127201	114782	221128	100733	104234	133670	135327	126295	179498	132280	151462	103051	160945	81894	101177	128264
UDP-L-Ara4N	262275	209637	237174	160417	217961	183660	182655	263984	220507	189065	245948	218730	171034	187814	222196	148963	240452	142041	169183	173922	185422	175291	170613	187200	181758	252106	178213	179484	186956	174808	192141	185753	176304	184029	179386	186518	162366	165946	218736	174265	190563
4-(2-Benzofuranyl)pyridine	200677	209826	197423	158170	199887	206221	178280	216091	195626	200108	199135	778450	190301	197574	188566	140116	201030	159769	152563	178920	197992	142496	188605	216538	196634	218025	190344	147721	205396	156445	195788	180434	168957	176382	177170	185464	188590	179974	163153	188858	184821
Naphthalic anhydride	28387	27777	28214	8869	27552	25437	27192	26548	27250	25774	27259	26645	24886	27013	26172	8640	26500	8704	26295	28294	27691	28109	25961	23676	26476	24363	225282	24856	27893	27722	29956	26920	25621	27879	25938	29444	25537	25397	22839	26794	24987
C8 H4 N5 O2	184513	118006	187628	228598	143216	207346	194191	150318	245695	186459	172814	192127	192819	166653	174397	204900	139790	146573	246941	202326	173549	231300	165359	128287	171057	132018	152419	292663	87995	194758	181685	206462	183700	226007	201564	186489	178185	213682	64375	176407	193519
> limit Esi+ 7.1000023	148397	104273	153893	157891	72943	187225	145610	111668	182074	106588	140751	152523	222080	129806	158921	172464	95202	184598	196665	168718	143232	175448	174061	174703	102337	102025	128612	203395	156599	184373	148601	134420	160290	143966	150775	153160	155786	200330	41035	170314	142377
> limit Esi+ 7.1739984 :14	158432	185988	141123	128703	1356662	122782	146110	179592	126934	1276509	152681	134312	118395	166449	140151	136602	1243007	128340	117275	139657	155404	128235	121720	135186	1337408	212608	169062	110253	149033	143142	157256	156833	131923	165332	143772	145490	138558	131740	1066908	124095	158905
> limit Esi+ 1.7630002 :13	180664	149914	253037	195461	144163	157784	160734	132761	11941	190206	161830	155324	114405	147183	124158	216693	188140	125649	170717	141792	168817	247952	152561	143535	190176	204019	206943	194952	130673	153249	171970	197396	223506	122426	233417	167735	164129	182626	115290	155391	162439
1-methylhistidine Esi+ 8.447	406093	267246	1671297	2069405	807791	1843003	833526	499099	464777	799583	1212450	1817569	437701	1382932	1950186	573464	853616	703772	297266	674913	1223801	883332	2086474	768165	497602	1300772	497770	254297	189294	1047209	1213183	191255	1305775	277953	1163881	2039706	2187734	467978	9702	994987	1209397
2-Oxoarginine Esi+ 4.7070003	204470	281231	120607	297795	42496	117104	126219	324775	320733	104352	219470	9300	99760	61195	128266	64056	47685	111087	254924	334500	293547	230381	114710	73518	73065	85648	55303	234150	94915	133428	188642	106917	141097	421702	191585	283581	100165	163597	119680	60380	182629
Linoleoyl Ethanolamide Esi+ 1.2910002	143479	152335	156414	161044	129168	145972	136507	161065	141088	153700	153833	141525	137061	137848	158283	147270	151590	145975	144458	146464	160663	152468	138632	122594	176195	199914	163732	146383	170976	150458	180255	144405	162127	143343	181267	140585	149721	139278	104790	134840	137182
Allose	565683	158825	714327	230864	144696	253975	251207	159718	479553	209422	245249	238139	645288	207524	286433	758896	189805	215926	749495	200414	571978	691850	269461	213880	588709	237195	272197	755698	211767	220369	575607	613989	709083	526104	706592	211680	229104	780798	307956	194915	591005
Thiobinupharidine	544966	550559	557872	543920	527342	536439	538055	537343	483217	297839	510800	517938	513125	540754	553410	529599	314280	500828	475492	534358	496274	539574	506745	515097	515973	506495	498344	530534	543091	467559	510203	520132	479754	505695	531805	512770	534509	534099	476756	536625	474016
C34 H62 N10 O3	307378	362327	396097	316520	359227	240744	305678	323120	317368	293495	278613	229966	234372	252714	282443	256663	259764	277049	261236	274634	312605	287698	280517	269624	329459	350003	283310	272856	262687	270133	236029	308386	270217	283307	292765	276482	219227	235756	374092	242905	232443
C34 H63 N16 O2	435709	457585	392866	429432	322914	515627	406601	429224	373910	417261	383147	428638	460875	468237	391168	407181	443472	324294	341908	351512	465823	346551	397390	460616	460030	401676	416982	328764	451658	524399	418850	407405	375217	383609	378842	415143	445868	492137	429125	478890	388134
> limit Esi+ 3.610999 :12	635504	965849	747366	649995	673693	502505	840947	837356	788846	687211	753153	677579	996008	564163	693044	700350	671857	679469	793528	761396	587707	684998	614897	608325	585464	662116	694711	671387	847379	629351	597203	811374	746739	843393	754817	776973	462245	579694	688199	819566	694876
C23 H47 N5 O2	190470	224690	199220	196206	213995	171959	181894	118743	152406	183596	194121	221401	198953	199973	202217	119434	188907	238976	184129	173428	184506	170726	230041	220270	202393	162224	176978	184296	206818	221832	188419	222779	182781	206144	187729	200176	178885	195115	212856	197757	181412
2-(4-Ethoxyphenyl)-5,6,7,8-tetramethoxy-4H-1-benzopyran-4-one	170409	157054	171121	101766	139940	87769	156759	73806	246330	82383	151250	75232	243733	80078	224427	71360	46939	40017	229554	159161	122142	137333	116836	9010	91375	59110	65527	308931	83142	15560	129221	140902	140462	165480	112519	99204	62621	148168	31799	3760	115368
C17 H10 N2 O16 S	150435	145027	170911	193978	146564	177004	169804	135543	170717	147039	156124	146214	148076	147722	145478	154483	149271	150373	172641	148619	150759	153205	144124	130941	159871	121538	159734	204722	127421	142516	150890	171905	149646	171555	154811	181670	155207	155959	84960	143860	141368
Mevinphos Esi+ 6.647002	412051	110493	813708	672934	254977	692689	511086	178502	299016	391315	396213	599086	283863	404186	660251	343323	389870	322254	303396	277333	415687	769558	589760	234434	228688	516842	599514	774085	201970	208651	417024	145794	773934	340824	720980	441621	537420	264660	65215	128223	401487
Anthemis glycoside B	176669	224205	236218	255217	233672	252547	258748	218720	297938	271919	173558	240032	245633	215100	245084	177793	256761	204147	238605	270855	181064	253290	197173	225258	258648	244108	217522	235402	222460	216339	176598	196521	212972	232646	186935	218138	244018	210567	167681	194050	171917
C21 H41 N5 O2	134896	146715	153925	150745	160503	168039	150510	89909	111879	154975	159865	164920	137019	145573	177355	125846	160025	130826	123606	140358	145491	156221	158847	154422	149552	172859	131598	152952	136822	138644	150048	136228	151478	133850	153925	142899	104078	138640	99969	120357	137587
> limit Esi+ 2.181	423027	413437	427667	454954	355145	474567	389564	375681	485646	392442	430496	446494	533205	415414	463985	442992	398227	442788	483831	387283	428163	394746	448958	335248	436559	355097	345758	489714	434969	409644	342702	485949	424434	432746	412172	428116	414180	448423	360600	338653	395905
C24 H27 N7 O18	110518	50581	153485	103489	35145	85332	119760	71763	77427	88160	112000	126789	98959	96402	114403	180543	103013	98074	200150	103789	114911	114496	130026	63151	152417	71083	112564	241851	78228	100023	114047	134501	147160	81758	133708	112590	76129	126539	23992	80997	108998
Beta-d-lactose Esi+ 7.710001	842723	506333	1216321	181346	416435	681386	665591	488552	392399	381813	784672	636013	518005	601340	316581	1327142	369519	546577	987693	470019	782731	1313144	792914	700539	1077513	1119288	1081832	1220988	488265	688478	774900	893594	1070135	527248	407077	172422	695491	1285242	298785	626418	757212
Linoleoyl Ethanolamide	214027	207484	176084	211138	180351	181259	190006	216746	203240	188688	201402	189315	185946	200224	207295	227347	177737	169071	198414	210710	197245	178827	180871	180484	244728	315404	203804	199815	237899	177583	207605	185608	209751	192157	230738	202774	171661	201789	127608	160408	194198
> limit Esi+ 1.6419992	186775	143115	212999	238198	154140	191788	389829	157021	121511	253754	178181	155663	117594	178326	144872	202468	299057	112838	141884	139477	169555	216825	157766	168205	183803	101990	175072	146938	132807	190331	158295	155404	155714	122371	191398	202564	191060	260186	123696	164379	175235
C17 H35 S	113577	106047	71154	148898	148945	123329	193318	99559	182523	124816	116729	112059	151278	87794	140781	62462	137973	150501	116672	177472	117223	75988	137470	65182	42038	44549	66732	88094	111091	86860	110936	76046	71169	159475	72682	148329	77914	43006	91727	94097	116339
Convolvine	153176	53493	201966	274689	90304	164187	228051	31787	184465	299795	186487	168265	357708	89394	271155	183151	123985	176864	394666	221541	191783	459133	274200	83027	154153	109558	154337	370714	151379	158402	177638	194121	272090	171022	240344	197149	105449	302912	3107	65575	179736
Dithianon	221908	239810	202832	209157	234264	203074	199167	223872	205822	215714	199346	204993	193529	219865	197893	179286	224070	212681	179691	197594	205990	183301	208169	210525	201961	204099	198244	176598	214368	200656	198170	187488	187349	201774	196032	196419	198743	179631	246454	199027	199470
> limit Esi+ 1.1969997	270000	33243	37361	46613	23954	55517	47372	27660	73152	2742	206365	34059	17365	15635	29349	45850	22767	32960	45258	29705	228102	27895	31768	24935	17681	74377	31062	46947	34270	26896	242978	43721	26874	32200	3733	38381	20585	49981	41885	29194	266769
Cinchonain Ib	84278	94961	80422	32370	80128	34809	69171	64239	205077	35323	93055	20847	123841	20554	86225	64438	18748	20176	203109	149926	91732	98930	43101	4884	61510	35632	48496	277103	56735	6512	86982	127018	113351	260618	104568	43695	26383	117971	45231	553	97761
S-(2,4-Dinitrophenyl)glutathione	98840	77152	111145	83688	74109	63969	73396	73286	144036	68786	96927	56087	70222	41640	61101	137483	45279	41756	198008	113683	96360	133221	52337	40209	92722	57320	94713	223799	43468	52619	94473	131709	120834	128551	127701	70356	48673	157704	39936	44852	103899
C30 H19 N18 O3 S	145854	46394	197751	114544	38751	153200	119982	109736	94868	41817	160812	153764	128296	151473	171293	214726	104514	126244	221122	38423	172316	230619	154140	167104	220285	204009	220780	260179	121110	167832	169922	214996	226319	117029	220587	138637	177776	225740	103160	163960	173060
Aristolochic Acid	178292	106915	193361	206246	89523	203989	192095	133840	171409	180575	176079	193009	202607	152010	190188	203767	185437	195989	229290	204511	178960	173884	180362	166345	164911	123270	158160	241032	148193	194879	173082	177239	198123	170091	185364	200139	182587	203251	49675	163627	181950
Acrinathrin	177400	94387	184553	208167	75346	210128	180128	130562	167694	179541	174491	197486	204352	165814	194967	195648	184704	200189	184611	193983	181462	103385	192330	185864	171838	129145	157474	190833	156072	215612	187184	171563	172532	154564	183210	189291	208568	207487	35147	181259	181488
C29 H65 N13 O	185691	148139	286777	309324	183504	216274	208120	102377	162184	287185	172699	243137	179476	237335	238757	160141	297724	173834	203668	171460	174602	263822	263288	166403	156971	196854	209397	185569	152241	167991	158645	170058	216953	160183	220119	256133	175734	183552	109385	166750	174326
C6 H12 O10	134600	90803	145148	151831	66419	202792	136759	95453	193699	87105	131790	158879	255004	114918	157350	175929	78217	193001	221596	161286	130341	177622	180597	181578	85440	80110	121661	238384	147330	188807	134484	117353	169379	129997	144130	142142	150749	205401	40006	163069	129051
Ceramide (d18:1/16:0)	180176	180030	186997	208901	175732	144818	254007	159857	233948	180780	156830	158400	151020	135623	179713	147497	170417	115512	212426	238662	150883	183557	177481	92605	153635	131027	147568	184056	113867	135649	169241	150523	162493	227341	155994	256556	108247	149571	119572	110886	156357
> limit Esi+ 2.080001	308247	248389	450237	412339	259949	281964	320669	245127	350721	357821	307031	279341	277197	229497	266688	356499	353424	237697	391799	244833	300989	497776	222131	226467	296385	297991	350515	400318	241207	251416	297410	354230	407840	254524	376784	356412	272899	389762	174833	262767	291052
C27 H45 N12 O	255052	112666	218485	440429	261435	237813	407895	131545	514940	342779	241580	137952	396499	74085	304695	251053	223468	169597	497871	480757	237664	161726	277088	130817	81149	80488	155079	330980	193943	212380	235476	98333	132180	358796	107511	399743	80245	231604	53055	154416	224822
butoconazole Esi+ 6.9190025	188872	152624	194653	178673	155667	171685	160031	172738	199077	158676	195734	161167	166256	158265	186987	198854	167690	167425	195054	192528	190917	187458	188079	142272	175552	153931	172793	226253	145358	155063	164598	194163	191112	198576	193065	202375	157803	167639	96112	160489	161883
> limit Esi+ 1.6959994	96713	103934	54933	157440	125435	66729	191204	123634	272690	127620	86860	91165	174267	42083	105682	71001	96401	144282	173027	247467	88148	70629	105913	59172	50191	32230	50084	94643	88579	80507	85953	57816	79200	177757	70082	183209	43979	86097	170657	66914	85617
C32 H63 N O2 S2	235077	208294	203280	239141	210713	210397	217616	210910	230630	217624	227278	211176	233791	196065	204383	221382	218303	210428	217984	236504	220094	207542	216949	200701	198452	194584	180806	202953	200171	194026	227742	210818	186697	220170	198183	228644	188523	209750	151232	204459	224004
C34 H68 N4 O4	354501	286828	354692	451792	305406	419786	309073	275540	320108	435479	327804	416988	314192	403109	429960	319622	415050	435995	360299	515470	316480	354957	313834	298712	453438	317164	325877	366596	275653	387831	323198	317804	363160	302498	365504	303906	272629	322221	188008	362504	449180
> limit Esi+ 3.612	594818	615897	511918	662040	613646	592187	790635	574090	650390	642714	587148	723201	740975	648928	735828	485715	704717	604121	615468	558447	552173	387437	671754	427698	467164	326618	454787	730747	559701	301967	575408	611324	461786	753652	504754	674557	543229	544842	411111	525787	482566
C7 H7 O5 S	170614	245175	113245	95524	221227	135242	152221	208349	229690	90582	169801	89294	190942	138664	218292	106739	105297	105429	132712	209062	175445	116712	156426	41953	100872	114555	102611	139796	182121	27538	176370	123368	123797	278803	130643	141920	128885	113185	222718	13091	169315
C4 H3 N2 O3	186319	195233	185239	136362	173889	132125	144662	174406	232152	123431	183638	120031	144402	104093	137317	223918	113240	107036	255410	204958	185089	199490	109995	109762	187419	160056	180873	268800	124102	112018	184927	233785	214051	261953	219417	129423	106446	209978	170368	95831	172165
Dihydroxyacetone Phosphate Acyl Ester	231838	255917	219769	217265	242955	221479	210507	229664	215851	225698	211241	214531	208647	222989	201987	193755	225705	221206	190860	205656	212757	187215	208789	217787	216631	219199	209358	176911	224562	202393	206515	198837	194162	207777	202240	195015	215113	189336	265874	212397	207986
Aloesin	65797	39017	119246	52883	118291	41314	58164	23196	51631	55039	53671	31331	65275	19826	53521	88987	26843	23903	213692	58820	51123	124920	148490	28144	74869	31542	62295	242748	32843	159408	54497	117548	108827	58044	75258	32607	28522	144942	48706	21523	47289
C4 H5 N4 O	144091	99697	136219	214653	93826	264165	153895	112322	157047	185382	149468	259820	152900	181919	167342	132105	187367	163220	134545	167698	145044	168117	246109	162651	87966	88772	110219	83639	115887	171658	141869	111615	124894	123392	114838	146884	193848	138016	57878	168409	140786
D-Hamamelose Esi+ 6.085999	277302	154256	80244	33994	131208	144999	52037	120263	38886	28739	179692	175024	122617	75498	191069	302684	162690	146587	309004	58191	65478	277841	102818	112613	228274	141750	174243	382958	37478	83312	70318	90065	290758	123225	227211	41253	96962	257191	150374	118455	201213
11-amino-undecanoic acid	229271	218710	215047	220234	213916	217962	208887	238311	190586	190801	234948	203088	192890	234935	195804	220482	171348	196106	234558	183764	229278	194885	197456	237358	249225	234985	211952	215782	204220	224461	218127	245586	200276	200316	193268	247298	206942	197794	156395	215440	226149
C12 H4 N3 O3 S	285611	252264	266670	276324	276831	276507	257953	294550	245769	225903	289931	241881	243970	248756	250694	220981	263750	264496	258770	250111	269424	259556	247681	259643	199346	259287	258350	272849	260667	256425	256781	230654	225381	250648	255581	275624	245684	251268	241965	244749	232999
Streptamine	110663	45682	152290	147327	31922	229858	121381	69414	86780	109655	119741	186540	151640	127199	144435	188631	115524	116909	240865	103909	116932	197199	177214	139756	128987	69779	111607	251619	79706	186541	117146	137932	149381	70033	134713	95540	176131	186212	18474	156795	123435
Phosphophosphinate	155127	141927	171296	150755	130521	123807	159933	147084	137243	143609	155379	140742	140763	133894	148677	173037	148620	153269	183087	153847	153613	139705	144533	134025	162925	151740	144084	210894	142916	129639	157108	151913	157310	146858	162732	175829	123722	153495	106667	131601	146596
DL-Homoserine	125574	105305	183609	102981	85390	37736	162101	103037	92601	103584	116131	103782	83529	74342	104033	181099	100243	81628	193263	122293	123854	175756	107999	36804	156301	90357	110991	253306	80441	61763	113811	127536	167990	127657	150332	176521	45703	110164	88641	65885	103562
C28 H54 N8 O3	134893	107792	232397	228864	294204	162790	212997	89931	158895	142153	141550	112108	116306	101291	143645	113422	107501	101283	133262	135039	139708	157937	149668	83309	248145	248543	217267	121268	250219	115265	109763	96007	215265	145291	374524	208798	108037	129338	80331	224623	130376
C34 H12 N9 O	105648	112792	53805	179764	113411	94490	206171	143387	276456	168650	127491	130950	164285	59530	108205	51161	143176	130512	142724	274650	131212	70578	118125	68530	62710	41033	62763	84200	79147	90845	130069	59906	86265	233320	83784	220588	74960	50824	74994	83544	137224
Eupacunoxin	246531	229130	220415	236126	247401	237698	218895	225692	250390	239882	240380	231101	225985	213942	230080	235326	225107	233364	223600	227717	224283	198073	236575	227688	219022	223488	204919	211136	233322	222027	231984	213853	215218	222290	215651	250387	213489	221399	146627	225071	221053
> limit Esi+ 3.6029983	425078	492524	707899	329676	387791	300409	440828	406930	336286	445764	416655	350535	521624	356697	399871	427074	483619	503519	446004	230427	412812	484439	348026	399267	515959	542455	620131	366956	492208	466437	404869	631277	520716	369607	477882	354969	311931	428628	201930	592226	338887
C8 H13 N4 O7 S	160409	126821	255753	133665	120323	91278	132283	80220	179311	147558	161991	83101	185833	61298	127869	180044	78292	86506	370548	167879	153481	200198	102346	71964	183021	114905	173042	410594	95712	106107	150734	264731	236428	181763	204337	98828	65924	286374	46920	56246	149831
Dihydrozeatin riboside monophosphate	82033	45472	140782	99262	53177	54473	91252	44458	76525	109585	81216	53639	51769	22016	57645	129317	57331	28349	248814	100548	81098	152879	43002	31327	108948	46774	79909	269681	16963	62015	82833	151572	126863	92332	121055	75543	38530	160866	15819	27541	81561
C33 H65 N4 O4	636581	534178	843190	1055222	690456	724883	873316	429893	788380	930737	617429	775481	658840	731297	666469	556762	863937	532363	583430	655296	629158	735015	731247	457551	454468	513893	603554	773533	478455	497226	607255	538527	615680	760897	677297	992847	546173	585252	316118	483379	617201
C23 H29 N O18	84026	34652	132820	70108	20829	55173	99389	51113	50536	63367	82573	96426	71530	64715	86189	151394	72967	74290	174553	77416	86651	95300	101101	45533	120607	49331	84997	222660	53651	68352	86811	106369	123835	60007	107678	93343	52077	103437	14200	58662	83084
p-Nitrophenyl-O-ethyl ethylphosphonate Esi+ 7.101	2136520	236042	2145964	2157551	237019	2376838	2063733	233660	2349290	1742193	2071662	2146482	2567401	1950045	2167902	2218611	165547	2323864	2386587	2163207	2055422	2234900	2233429	2331827	1705806	180318	1989304	2447506	2153059	2266985	2035572	1941261	2154285	1992398	2051231	2109366	2105969	2373649	207296	41183	2007793
C37 H62 N11	249802	410270	358162	289636	351205	227293	253381	298551	298619	267436	256615	245682	220196	257655	206246	251694	246414	265441	254827	285005	237710	280480	206937	252126	303768	328992	311407	300086	241707	224527	230128	304758	265744	264407	271607	250215	219406	208256	283626	228599	239540
C35 H59 N3 O2	411045	293857	460520	434225	330355	358731	444900	120870	425093	327729	252753	271920	281702	348533	223889	302531	361374	193468	433464	357862	405012	348019	339325	152185	208913	225845	279003	581204	165163	256380	363485	377163	385586	305264	420221	437928	150281	432395	192172	166091	279111
Galangin 3,5,7-trimethyl ether	129180	150840	112218	67063	128638	121709	81734	123864	180272	50761	136799	81886	225142	128888	238809	127592	53169	97139	207378	111139	131533	149912	165491	33959	107628	104913	93084	273152	222373	22758	139020	203720	156819	209386	174937	81806	106160	115362	127341	13581	135423
DG(18:1(11Z)/18:1(9Z)/0:0)	313559	239792	280758	260305	341214	277064	244329	255038	287063	262707	302433	244066	329776	219267	245103	322338	246209	302922	315055	248488	284467	301142	300590	309584	327199	309018	275782	367334	212299	266087	279833	283944	269848	296950	312314	311297	236800	332410	208418	233856	277468
C21 H29 N3 O16	164082	107500	104501	159628	97958	98803	230031	129203	135379	106318	148191	122451	110506	59110	168650	89158	91377	120032	144872	192153	144426	119173	149431	71760	95535	69559	82976	95289	57442	79875	142914	64533	108239	173474	103662	204140	78989	84997	55986	74341	148874
C11 H10 N7 O2 S	190550	217745	170869	160574	223290	149524	169195	216783	182905	180588	185726	148322	1102896	185923	168496	171778	152165	913660	150391	177068	181055	129958	886484	977399	189387	219255	180215	1060583	801813	915028	183203	166951	144810	178780	717278	151467	812225	993557	192761	188728	160334
LysoPE(0:0/20:0)	268783	183000	239445	640222	250921	312267	465801	278016	321792	590053	278347	296822	222390	164934	279000	305807	529845	223108	388851	416468	253666	344298	310678	206979	79958	3018	201136	182787	66112	280453	243474	171912	206098	237255	199342	509528	190882	348071	95280	226152	248389
C16 H38 N5 O2	116211	122780	68616	291088	124110	81748	168173	125837	176663	87372	126953	43919	135841	160321	343080	99431	68695	220514	139357	126640	86396	105049	48355	79375	71859	146659	174947	152461	131384	55749	134000	98402	95043	40198	74863	209191	74633	82246	53240	132174	123255
3,6-Anhydrogalactose Esi+ 6.6260033	262806	81033	379633	124779	95158	310637	279322	82971	114894	228327	259002	295289	255658	126969	150046	293224	107212	105265	139233	104434	270759	355642	301765	96479	223451	286683	146975	363270	210533	231269	129268	85522	368790	135944	372822	112407	143888	131232	127056	183751	263967
DG(14:1(9Z)/18:0/0:0) Esi+ 4.761001	237674	291256	172327	181817	210852	205550	210098	236453	228076	181274	234390	255395	229796	250437	277533	235952	181995	237692	250140	221891	224151	181357	265684	212395	240928	188119	177276	244894	227179	187569	204647	226547	192295	263118	209563	184478	205951	232786	210688	167180	180841
Primidolol	77234	88718	44373	146290	75820	53300	149535	113574	167133	112405	79567	74527	81718	43552	58727	31337	91776	94061	54822	262914	82773	50138	62849	50571	43620	34371	46018	32879	45435	59397	86449	30373	63553	145921	59475	169701	48182	30251	55622	64913	83771
ADP-D-glycero-D-manno-heptose	138683	89668	169997	153162	69045	226991	141671	104647	231025	125323	137839	183423	280463	119933	168193	205040	79901	224531	238122	204448	172615	207853	212277	230106	119619	80577	126065	255867	158625	223008	143689	160211	186531	170179	169967	178011	188667	233633	36426	175868	135979
Diglycolic acid	93589	58926	69702	75060	30867	92084	28414	50813	44227	143360	89360	88041	53192	85940	87616	89006	111526	76010	317877	63867	98058	122632	94530	18249	186114	41979	99952	152682	46831	73063	89064	90616	102702	73406	139330	32709	90200	81997	29761	97792	84968
3,6-Anhydrogalactose Esi+ 8.341002	152628	86338	132246	190936	110769	222838	152749	79998	117137	139714	172195	284456	85648	210326	272803	198880	129178	84131	137256	108762	166035	191594	281650	154811	163591	171082	139397	140187	66075	155826	137068	115887	121345	114567	125765	159214	246351	209416	38207	140518	158545
Lasiocarpine Esi+ 4.9290004	298524	414297	193245	321804	275300	178172	411295	427343	422428	217927	301185	178767	232300	89979	201061	465226	140507	159461	510466	470773	294616	240468	146968	141062	236520	138776	170498	530637	145827	236219	287381	343756	273597	622228	289168	336848	129932	274996	129787	137309	294808
L-Galactose Esi+ 4.9019976 :11	876657	609203	752889	682457	464901	904269	725862	667971	791086	467945	889280	756751	1113401	652386	1206866	1317844	411842	660782	1180648	666682	843205	1060757	919394	602391	919161	624487	745371	1930699	656182	930257	805908	850977	1158829	1196747	1014713	707862	951042	871949	206047	548234	859158
Glutathione	65558	29838	178985	24913	22377	32551	51827	33196	33136	12302	64758	37940	47309	47540	88343	208134	14277	11450	108712	9190	69147	158817	47273	16166	179631	138833	211115	279302	25280	44891	61583	103516	221762	60579	228428	74326	99182	158170	22755	10499	59736
2-Octaprenylphenol	221793	285790	221818	209413	265245	196878	287524	220630	259876	262558	189186	247839	243508	209091	199484	344252	253991	268140	210030	264255	209053	219451	265364	233082	300340	290185	230942	176435	251526	257430	202135	243723	207332	226038	219651	296468	232047	307375	179145	215563	208495
Maltohexaose Esi+ 8.338998	85140	35217	62944	162287	66726	221018	106277	32796	37936	102992	87382	238049	20516	179082	270059	117119	93804	34581	42615	46561	87485	145671	284111	91257	87187	123225	80534	57499	16326	85160	83877	43177	56633	26517	56757	121288	267264	135488	11579	76036	86885
3,6-Anhydroglucose	773684	403761	1387261	466528	323814	638147	662824	412554	356058	305239	758178	638431	431705	535780	1039110	1635032	300279	447088	1109817	450916	755257	1743191	775821	594161	1229408	1274177	1266617	1570585	336910	698538	753524	965255	1297914	503051	1281124	612829	702707	1709539	278916	600220	772765
D-Asparagine	208383	169140	229213	302017	161554	257467	199999	185140	189001	217286	196654	269112	182592	164862	198416	194331	215730	198392	259201	193778	192332	196471	236908	189587	135482	138969	172753	240056	139551	221834	195821	181001	175321	194484	201014	212750	261453	165903	118084	223208	192079
C16 H34 O6 S	22107	15377	20458	22013	24195	15402	26109	18129	17808	17211	19331	14707	16173	21058	23547	28210	19905	25220	17539	23184	26016	19700	19141	28782	28455	20044	18889	23618	27434	21312	13414	21506	22050	17719	23208	12347	20102	27520	254031	19922	25155
> limit Esi+ 7.291996	185908	106957	185723	202482	75093	290587	178276	151184	163443	185755	193105	255391	211301	239238	210354	197591	181567	200209	180508	167690	202415	110121	236829	275648	213695	181013	203240	176671	181625	284435	196306	189417	161146	134708	178502	147988	271083	232139	43907	279394	195876
C4 H9 O5	178047	220368	139639	190887	223857	170608	164366	197715	126726	247550	154303	207506	177658	257911	158482	118619	263074	243718	115312	148674	151786	114243	212723	238419	166606	155741	141202	79356	220202	241925	157939	135242	108987	103055	102559	185056	200347	138911	178290	297454	156473
C38 H70 N7 O4	366156	622756	496165	394528	518947	325517	322530	386084	311738	393304	320698	367981	306449	385901	297397	245688	381627	333616	237216	273174	298331	383206	322821	342194	365655	467062	414882	173332	328747	302735	283966	319641	345177	215106	322067	272186	305564	236865	577775	329593	269113
C20 H36 N O22 S	237388	137351	241495	273633	114581	291258	240584	189270	227002	244710	244521	263274	276931	241993	258576	246442	259736	273854	207438	256477	245818	101261	264659	270479	230920	197418	231931	222645	219319	299624	245076	223341	211129	217213	241350	246480	283088	273461	55508	266955	252389
PE(15:0/18:0) Esi+ 2.2229998	367461	378147	246188	246822	310764	379765	287794	381018	435740	224644	383806	347327	466507	340785	397334	441479	177425	419853	449923	333364	366202	307301	336524	394254	404231	299145	247104	583109	431042	430169	303967	417233	314014	463617	323251	256323	267997	407027	285440	290056	360669
C18 H19 N O16	1120241	951333	1111234	1103891	882606	1190361	1074337	973109	1170998	939503	1097128	1899	1231227	1039177	1134606	1160641	2890	4057	1176174	1116385	1073935	1152766	1147816	5988	1325	923927	1058857	1206721	3948	1157988	2084	1037438	1125609	1047733	1091340	1079703	1114809	1163081	85790	1136277	1046442
C8 H19 N7	268713	257106	275245	262496	264591	282652	262595	255088	246116	246485	303587	312324	268794	278380	284729	282852	269439	271371	219921	238589	264515	284116	291692	265768	217917	142825	242099	247196	217298	327841	262151	242902	274347	270586	277870	281872	266015	247195	191534	296712	263886
C21 H49 N14 O3 S	166960	161954	128290	418310	345932	137923	419457	174621	485721	348669	175236	118103	451662	63347	352795	155994	185749	174758	427290	445646	180364	223779	306695	80538	94586	69952	119094	222970	210146	255355	149845	106717	144511	286931	148777	388713	162660	153040	56324	198024	185428
C11 N2 O11 S3	229409	195056	236369	267381	196315	259773	245085	202287	256782	237217	232173	243368	238824	205449	234796	233540	225336	211493	287162	243504	229029	270918	241591	202123	204405	179401	216571	292708	187607	218625	224909	223526	242498	242191	238944	238427	234672	237685	131614	202219	228157
> limit Esi+ 7.0099993 :10	230573	231596	211268	228863	238206	206376	208410	246112	203081	232379	231952	216001	207209	221831	217356	219846	210705	210234	196164	219576	234612	209931	215571	234687	237387	245267	223863	234345	229897	216260	231302	225698	213795	226752	214135	238882	212374	208515	176155	213911	228543
DG(18:1(9Z)/18:3(6Z,9Z,12Z)/0:0) Esi+ 4.6669974	279357	293202	299834	308650	247756	277367	246955	272020	266618	288243	280311	261622	235370	213037	269374	316692	272111	215973	312493	271234	263516	337508	252526	232618	284580	262452	279544	343623	221854	271361	266973	281158	294582	287948	284936	272570	243626	296503	172409	223386	247081
C36 H63 N8	211182	190589	304697	290715	227651	196133	263286	156977	216496	272586	185239	206677	162398	202244	195103	175217	278748	151012	201343	197125	180096	226673	199789	131839	157747	182458	213280	253298	137579	169156	189066	161040	223900	229460	224698	327321	177722	181916	126324	132887	189067
C13 H25 N4 O	175731	219440	174939	187379	210620	183718	239599	187373	238859	184154	137912	199701	181433	156677	230832	175653	166225	227570	247040	224663	170178	240136	187958	147427	159878	159275	206425	231309	197425	182620	179450	172893	183391	177342	190065	215972	125202	205498	146874	140537	139952
C22 H26 N4 O22	203863	146621	211520	214290	99141	251217	198736	161492	243905	151926	193341	222377	290413	182199	222194	235972	127952	250799	269453	233946	203864	243584	237695	248137	144856	116338	186322	280772	218946	247598	175901	188171	225294	187753	196631	212964	222800	261213	55166	228625	194997
2-Nitrofuran	138033	108514	305386	119606	93772	153237	135451	105342	115458	95028	142554	166674	100675	173119	126720	163360	109969	43694	157161	71086	134648	230224	100564	85141	202117	236261	288630	258735	53021	118214	138927	152254	309543	131121	294777	174157	172624	167138	126202	109883	146722
C21 H26 N6 O15	165993	112807	149940	223127	144669	242622	187630	116627	126990	186804	179380	239884	92016	212720	251631	197161	181707	121221	122423	145251	176144	219234	262250	183533	177813	199091	169552	146292	77653	165637	173506	114346	143098	110489	141781	195055	239929	201288	69908	159565	175163
C11 H23 N4 O Esi+ 1.2669994	176193	601186	189283	205632	189203	160046	215514	158616	225288	594540	213352	178731	200987	629411	158436	707007	194616	186871	206505	217271	657530	275965	618539	666096	191624	187294	139405	545606	188732	678567	170203	604074	637729	198687	174483	198240	646174	606429	137687	144394	653972
Levan	256637	205711	229114	240314	210333	259185	221051	202364	173432	204604	250690	264893	195043	252710	286158	294872	204319	216391	228429	196753	247046	296111	276950	255414	255259	273922	243561	244339	191437	244810	245772	248316	229009	184846	234323	231840	266879	292731	172956	239430	242353
(+)-gamma-Hydroxy-L-homoarginine	152732	86300	203919	264140	111192	217861	186003	124236	94441	262265	167822	263259	88937	156220	127204	233500	268763	119244	193549	108007	159666	209081	142212	212901	210572	142649	191493	189330	47989	294774	153949	201489	183448	89121	199560	195218	223466	205126	64363	269601	160640
Isoguanosine	147776	78801	200498	152513	89113	170500	162675	102188	135387	112621	150984	162763	152188	155113	218722	190416	109112	109571	172041	133021	152368	270841	176852	102076	123181	114818	170896	226264	98889	142495	155797	124887	232128	176114	210447	183825	172520	164171	45367	99991	158968
N-acetyllactosamine	116419	38713	202240	61032	25984	102428	94336	46088	45559	40883	120178	104045	69672	81654	156950	287204	32879	57779	213508	58361	127031	268884	113618	108840	238049	186493	234866	239460	25911	130607	128660	186023	239313	70167	234289	95319	126327	282719	14984	119886	130768
LysoPE(0:0/18:3(9Z,12Z,15Z))	287162	255634	263991	327872	172640	254213	396288	286830	416727	294931	291504	292979	335171	151994	274089	249627	212659	283458	494910	422578	261404	330509	252853	192182	215371	120461	266038	388558	156224	236281	281540	188488	416598	379744	331062	338050	170527	274508	121951	263218	260497
Convicine	581665	462814	986223	465206	428182	346483	493515	342185	708243	525681	587519	303911	707972	211482	481487	750630	281865	312816	1510748	647312	577661	906885	360093	254787	699808	419351	643408	1622978	391198	394349	577481	1066131	997164	751057	819959	366179	234363	1137082	211071	196905	565202
<none> Esi+ 6.7629995 :9	205594	168429	221957	256082	177185	248070	238960	183311	256581	223294	216798	235424	226648	191961	228643	224773	216099	197464	280132	244696	218397	259655	236191	195431	187537	164453	200535	287963	173784	207950	216447	206280	232581	243518	233765	231963	232912	230086	112642	189104	225996
C12 H3 O	135590	117658	208557	98934	89015	58118	178318	121847	97297	98381	137436	114707	108136	89665	117956	223706	105448	111232	232342	141666	140298	190244	126117	53799	188513	101486	135180	318737	98303	74960	137673	167314	201489	151808	177670	195871	62694	132429	88805	73477	133279
Streptozocin	239731	151651	306209	228309	229756	249856	183067	121882	202467	224177	226742	233441	248546	247651	276910	230855	195715	228883	237144	170805	227324	298731	247136	168917	185927	283779	315468	184189	206233	232403	222367	233375	285656	99578	298830	187351	238020	193189	130225	205700	217349
C20 H39 N4 O2 Esi+ 1.2879993 :8	872769	867927	856420	833152	901156	809315	921044	757691	922170	890715	847241	844725	970464	838243	857298	775007	867404	857001	838917	915141	846881	797723	862135	813485	808513	777376	844628	767267	884674	849280	847286	819788	819083	867513	796996	944424	823710	828702	606605	824736	853569
Jadomycin B Esi+ 10.4349985	92956	54465	99202	117402	45533	158530	58698	46341	146078	71528	108137	71125	168760	70979	127432	168846	54537	118291	416603	125042	110641	168736	116365	93159	107077	70005	120291	524327	141586	91170	88510	187414	176283	138732	209594	107170	102084	207634	23306	73779	128767
Maltohexaose	194236	93001	369773	51815	49634	74185	145751	95772	77692	30159	189830	73493	180487	56825	178896	469466	29048	122691	434054	108742	191760	425689	89483	126951	338105	279636	335375	515122	132457	161257	191859	336416	396058	152555	370574	130559	93129	504213	64719	133012	204726
C11 H30 N9	60239	112557	103324	312368	149099	67176	215978	52680	299019	78624	58905	104433	103957	124468	275131	84066	66044	229178	207876	104523	57065	131275	52323	56409	120329	283018	226847	133088	180350	84423	53887	136617	51727	50083	82831	200644	61035	98682	49978	83739	58221
> limit Esi+ 1.758	350895	312315	412537	349625	318133	361977	317479	298731	223719	296182	381651	381045	296077	395851	334636	373339	395903	337459	353480	273827	361915	374573	377469	370709	368653	355519	359503	391448	353639	380945	355087	406318	386655	247464	356605	327979	364725	384690	298205	377117	356810
D-Urobilin Esi+ 5.2100024	268944	300297	114536	233286	268676	200128	388055	339933	569964	222953	296897	242067	437890	208648	293780	188273	160203	372569	313972	514194	259784	165608	270860	206176	181247	121674	140554	290768	251782	232748	278106	190233	222090	486318	205112	360728	175077	215759	286680	206790	264190
Cucurbitine Esi+ 9.166995	261826	247493	319775	283732	206151	239025	267242	236179	277744	255690	254202	225982	233479	175080	235338	292597	217651	210003	310947	301861	255344	334280	196375	187038	239505	227690	262818	428461	183105	238773	300828	269324	381041	246304	302484	292097	225221	288325	158576	194409	254379
2-Methylbutyrylglycine	110149	45090	124039	139889	22200	253627	243613	64094	177705	64629	113486	165385	343979	77288	93935	57878	35206	238311	94659	92446	117607	158136	161815	324418	29614	66137	139432	76875	153451	166515	124558	44642	176207	52205	87721	184616	162278	173368	13030	218448	116081
C8 H7 N2 O	219557	132856	188648	213163	216523	182597	131860	136197	135162	396814	209077	221777	121774	32559	208928	320994	322524	81865	329819	249526	212962	222001	214709	189833	330237	208493	135738	173575	78629	190030	216333	255854	118145	113658	127944	155245	194032	129866	126990	172153	210597
C23 H41 N	217953	213637	215594	193935	210725	33362	197635	198534	200649	197790	43704	200564	194352	46529	201147	252625	283693	199567	174515	175743	217020	183546	203076	220371	38721	208824	188310	177326	208158	209337	196775	180848	192686	195167	180481	191674	203793	175315	284515	193120	210336
5-Formyl-5,6,7,8-tetrahydromethanopterin	188599	76643	55654	281647	149863	249840	206162	80439	145993	199688	171187	284768	74524	193719	258216	91607	179108	84268	97144	144750	179347	88803	304564	156416	51413	54386	55671	94083	54881	144930	175334	72616	65409	71861	68373	214144	256580	95752	20068	149588	180536
C9 H20 O4	134862	153650	123764	186102	81258	126526	139611	158442	110417	269508	148660	185361	92849	162152	106521	188229	158338	148027	166644	215414	152296	191813	186266	259080	102115	140995	92430	110543	199964	102699	144191	303308	178511	272094	124525	94384	112770	180802	101454	115806	157456
C17 H19 N9 O5	112067	67067	102258	79524	67855	137808	114256	84142	39888	60614	109787	110479	57843	100852	203486	246012	71824	119323	198068	129637	108649	156726	166544	141738	116568	75313	61248	161731	95951	160082	107994	147601	86031	78315	74860	69374	120773	286152	65500	123430	108709
3,6-Anhydrogalactose	154599	75698	263876	94220	58769	121352	134470	81073	75386	58545	135888	129076	87345	95740	207409	306344	62091	91023	218912	91745	156802	324349	159578	121535	237977	238441	223517	310502	72952	135472	145525	187135	243237	102217	249583	122133	142359	322006	49624	118184	160961
> limit Esi+ 7.082 :7	279016	255110	280770	284528	239104	288543	272620	258215	284480	257434	271919	274742	296189	264278	282205	295438	249901	287447	286243	283583	287487	283326	291887	292181	259445	253437	276005	292113	286040	284155	281832	273638	281788	279452	282303	288975	282308	295247	179409	279074	286020
DG(14:1(9Z)/20:0/0:0) Esi+ 1.4039996	734184	494274	943447	690561	622453	710044	612026	518297	524287	681019	708860	730561	647494	677630	694985	752931	723392	701801	871693	556141	681201	858884	700903	647120	787976	870367	910294	787064	577149	545003	680579	843481	860880	490332	862658	606326	616103	772571	394844	615476	624203
L-Iditol	130685	60182	136432	99491	74259	117217	106254	65361	85345	106101	144981	90736	208486	83081	156561	277836	87736	160938	306208	91664	127887	192955	160706	128379	159271	117637	116594	324541	166195	187027	129956	272746	167973	111197	170743	111507	122280	272977	41000	233849	175566
C9 H2 N O10	268955	246306	300067	291787	238969	304429	256267	246944	294254	290154	288050	290439	263969	271308	294651	320054	272602	225253	353326	289656	269482	288918	250112	237113	271823	230088	262597	388812	225192	268229	284661	255239	307093	264370	315489	323059	283511	269864	174792	254256	252138
C38 H80 N8	48658	37473	18424	39708	28162	24451	29364	351264	35020	20563	48847	18712	24364	70714	23979	198940	16903	25722	21270	72790	45192	17796	11726	20523	12516	6943	82306	22263	16152	9419	47073	13646	62502	19047	18623	24939	164501	40244	17529	45777	44371
C23 H40 N2 O2	235896	230890	228661	283470	237614	200946	227014	169382	284530	213543	192626	188560	273473	248752	241377	207139	226880	246261	187117	243426	210198	219860	205323	199520	215903	249228	223170	227733	241220	187006	209348	183712	158639	225778	213808	294852	207735	199002	137408	250677	204100
C22 H45 N6 O	311704	340865	324499	323804	330790	318029	288653	243689	302349	341987	302254	333932	317173	310790	324890	247268	350043	341025	296175	298272	296017	305800	308482	329030	315178	277939	291535	291687	310626	327591	301389	321303	301255	308963	322630	312042	290541	314701	331060	307172	290057
MG(0:0/14:0/0:0)	159024	168992	142423	151454	142093	141298	198890	116353	272549	156200	151875	159844	219825	128346	169490	153798	119998	145246	193005	198906	151512	169757	186677	123959	145649	145204	131331	239387	135684	193380	149278	132105	158596	235540	179811	185188	127625	184763	101719	119756	159547
Phytosphingosine	263662	262120	160008	331407	273763	234842	358654	233045	392151	295859	254368	247036	336921	164535	270138	171589	320070	292779	265062	402647	239672	154033	278770	214711	157621	107628	150443	213002	259926	235728	241795	183307	183609	316856	172692	315792	167432	186779	187148	229191	266135
C13 H16 N2 O11 S	259938	145853	262779	269253	116049	318383	246225	156292	317564	186946	248219	267627	378328	223898	279470	290373	129108	311231	336402	277521	243831	287294	293318	263272	143236	130606	234679	344064	260916	303288	246860	225305	272180	242947	242259	262500	275257	327614	62615	283027	243548
PE(16:0/15:0)	267848	355619	138300	167615	247958	216571	214368	335211	326985	156351	262558	213625	406740	219120	261081	268465	135636	318742	230533	267376	263672	152849	209545	253045	247341	184406	144600	320756	396761	307209	266555	227007	171040	379494	196117	206804	209499	274747	289697	206659	251753
B-Norcholest-4-en-3-one	314890	345332	296203	339285	293927	275943	346546	300963	378825	326846	304141	315625	308715	290128	287913	271303	354883	313689	318790	367942	325342	306871	285657	277903	283519	245444	266693	283265	286974	251670	322903	266114	301209	335050	279373	320115	273765	313011	197532	305273	311982
L-Galactose Esi+ 4.8539753	880180	591661	297521	687493	357050	936449	736864	629128	754376	378631	899764	320809	1025830	674892	1229286	371872	404310	685155	1187357	636790	854696	1137138	1037064	690176	963892	643033	808881	1907390	677626	944753	848522	253619	1143119	1117652	1015434	779349	1054351	364595	99992	586578	912353
C15 H39 N7 O5	177019	277834	196845	166687	205973	177063	149209	236535	174063	181064	239855	141083	244636	152948	224009	245097	176359	334340	233574	171268	208188	160870	191739	221761	174642	132712	207467	131698	297948	302773	222755	181284	175672	226518	227435	179325	113724	137359	374966	285248	157185
C5 H13 N4 O2	1207546	547075	1787502	1327802	1013612	1611927	909239	469892	1027590	1299602	1238497	1511374	1509338	1408936	1773204	1366391	1104823	1337215	1466339	849712	1256681	887539	1589845	774825	836386	1583126	2013561	1022838	1081434	1476132	1227363	1309476	751036	394546	1926364	1033734	1523805	1101233	417044	1125527	1235820
Pyrazosulfuron	156720	98841	204130	138532	78553	113380	179378	115849	112123	133710	157838	163680	138971	127140	159600	236357	144057	145660	266951	150889	153100	180926	166506	110018	192440	123588	149105	326195	120788	131382	159142	181206	202643	132806	184256	182097	114149	170352	60612	123293	154032
4-Guanidinobutanamide	476434	428867	446715	426105	334088	355135	359522	349813	323879	325120	330440	314888	255416	257437	280284	271102	247191	228079	264423	228734	230804	292271	191965	191948	199158	217156	227726	124226	155808	194435	219111	204540	230181	221953	216918	217123	167580	180595	117201	164794	186672
PE(20:0/18:3(9Z,12Z,15Z))	531532	539632	531544	564098	462774	507701	506014	518043	493990	594604	520915	520001	488850	491382	455751	560295	557792	466254	547264	493418	520427	518654	494534	552102	542673	384758	473124	565362	485231	560780	531043	576398	476168	526520	485709	509101	516323	603999	457684	591091	520525
C28 H51 N8	180317	152589	278297	220143	140902	185887	272608	107504	236445	239674	188563	237240	162669	141896	159333	228307	191203	145925	261002	209149	166081	263146	177917	112631	210432	160421	207117	406515	99595	158800	176670	185906	216954	215161	237801	310311	160046	266568	91129	127469	185751
Fagomine	288393	291403	295737	374731	252525	271610	340630	315053	461065	337597	286659	274186	233396	192635	214615	346499	273991	227323	342200	420641	298188	366534	251317	192717	207939	245122	250217	460386	176058	238476	291339	241837	278195	395157	319458	372555	219753	283627	182402	155932	291506
O-Phosphorylethanolamine	580351	260238	514978	719740	469509	279618	621769	379798	796700	760019	705527	611795	437413	333264	301240	718119	621273	599570	1255539	965247	734264	1030097	483289	485777	838805	406898	559766	1489956	275213	511386	734132	1053504	702380	814678	773606	869766	478449	1118575	578612	606787	673010
Teleocidin B-1	355154	342456	339517	361200	356227	396112	296483	250515	312991	377642	340475	345709	347558	317099	375819	364375	337103	280094	334836	294904	341126	398062	336347	412242	393030	374207	278930	314367	341663	370567	346508	359389	328901	324757	390991	345814	320268	345630	222060	319361	331490
> limit Esi+ 7.011997	319114	321763	287624	313844	330706	293423	285274	335264	291270	310121	324240	302235	281363	309350	300648	311215	302274	296284	274639	294702	318632	293389	292962	316481	321360	344686	303609	315941	320830	300995	322646	310855	296951	311659	295691	335053	288321	285090	237405	291991	321104
Megalomicin C2 Esi+ 4.401998	567406	496175	366706	996603	621619	548188	951300	587677	957279	895583	559484	492584	1010911	262404	664274	503387	649990	691881	758899	1117725	557498	578155	602353	364935	297809	131404	315454	665065	574731	572789	522825	341843	321478	819597	296436	910600	320931	541412	210844	393449	548668
C32 H12 N10 O5	264046	194659	275519	276848	123456	336376	256862	201341	333842	198364	263572	284415	393606	237908	292970	314899	177128	331467	357813	296455	264293	311440	317095	321699	187534	153141	251558	370714	283825	335707	262044	249851	307452	259674	277645	278818	293931	342968	69812	304599	253484
C17 H37 N9 O2	430938	332033	352203	388298	338060	355954	408695	324024	395312	343830	360042	367042	386885	316684	376715	330820	348352	364384	337720	428625	357536	315484	364040	355947	341950	321034	338819	363234	345743	358230	395087	337442	294076	346439	353900	408903	319590	363008	249047	370057	387964
C20 H20 N11 O9 Esi+ 4.9960012	669797	587637	378819	304112	567030	644691	444413	562586	385653	491715	613408	614598	405826	693547	584657	648398	551914	536483	489123	389335	630334	363102	338840	624278	686401	714970	693208	347226	604257	647665	628065	671912	309294	493209	646085	491706	344148	372973	495432	676145	641082
<none> Esi+ 6.7650013 :6	297070	241403	313618	355693	248377	349219	330670	264646	351476	316395	300135	316572	318321	272652	315613	306061	293502	283161	391040	330411	301720	353546	322949	260891	270621	233018	285698	395505	243236	289137	301205	289493	321044	320699	323294	324317	316465	325267	168372	269564	309191
D-Urobilin	156202	280181	70369	153374	171870	118431	242367	208823	370131	141126	160247	148167	289188	111926	181822	102518	97068	240777	195991	345660	168248	105203	178312	115535	95425	69185	80468	187419	166782	134752	173647	108824	126831	328703	134373	225705	111775	125692	327323	120913	168338
2-amino-3-oxo-hexanedioic acid	152677	210430	77894	308112	122664	295364	198230	232952	266991	226560	169433	324718	106645	195351	151922	59689	262300	89581	28455	214682	176884	105548	188563	134984	61981	48261	76686	89711	50574	266750	190996	30353	81091	281185	85058	284884	301540	41523	111242	179431	180266
C14 H32 N3 O3 Esi+ 1.3059999	376104	368870	416527	357525	361428	379971	373201	381448	364690	368640	361668	367919	354351	358038	362611	422030	346852	360943	381197	370135	372897	409951	374669	359212	349053	385295	362190	386550	361407	363866	374621	345819	397623	352054	352378	377223	393680	359566	276413	343928	352809
Beta-d-lactose Esi+ 7.7109995 :5	842723	510638	1222226	355321	416435	681386	670722	493307	392399	381813	784672	636013	518005	601340	649299	1333605	371355	546577	981812	470019	782731	1313144	792914	700539	1077513	1119288	1081832	1220988	488265	688478	774900	900469	1070135	526744	657630	481363	703045	1285242	298785	634128	757212
DG(16:1(9Z)/18:1(11Z)/0:0) Esi+ 4.73	452388	492988	377828	413245	484720	404244	436522	418236	412023	419793	434015	434048	422440	462685	474055	408262	406162	438200	430033	429318	378728	376317	470068	403921	425735	350020	359576	423995	404993	374858	389664	368241	361712	413007	376431	446149	409823	392673	348215	354661	384992
C20 H42 N8 O2	435513	427187	397545	397235	388283	380125	400327	311657	395567	412722	422321	387761	403145	394568	396209	309195	430377	425003	399140	396199	398166	542072	386173	367756	420628	456166	358929	367141	444494	396088	413925	402672	362232	393460	385011	363478	278903	241469	406432	383764	393806
C18 H25 O24	143653	152880	146048	76154	115888	70623	89023	131389	245861	63967	144171	56857	89167	42523	79874	229241	51829	44871	328024	185085	144317	183323	53304	49229	153089	98874	144453	379652	68462	58175	148005	259810	210335	310600	231204	69772	49049	233194	118949	47346	146433
PE(24:1(15Z)/14:1(9Z))	287502	267960	345725	474115	236886	303369	341128	298888	223772	507547	275463	260289	191745	247735	243868	366752	477818	220007	290733	292539	276345	360845	241432	286204	262762	232436	325969	238109	193137	338104	271600	271173	276247	219944	296537	335734	301157	386356	176532	296341	274065
Cucurbitacin A	311102	320190	191225	342018	184483	184036	489640	335718	550226	315697	221005	241586	274900	136438	237161	202392	223372	279474	366975	577858	315553	219011	199738	162828	215220	150110	187252	195204	161954	192036	336638	211258	289644	355561	284788	433392	148834	231160	156823	214948	217856
L-Methionine	240723	178744	324205	335786	229512	186666	385870	207287	247555	282924	239444	181071	122164	171681	202384	252415	245000	131262	275597	335566	235454	424196	174812	76395	196084	208028	222705	371520	85845	98142	234063	190851	417614	284216	304716	408941	162611	206865	124562	76377	230357
C18 H41 N7 O	813196	773041	705178	866745	744231	740576	836909	929483	870044	821013	767810	732948	776117	737898	740068	769109	767398	750274	763631	904664	766294	671603	725806	677301	677253	630161	705356	710702	687111	688679	760253	680494	725093	783468	667589	825061	769852	687315	501792	715782	763149
> limit Esi+ 7.1739984	272633	2055488	252119	237494	2095367	210171	259561	302345	224158	303781	239503	235545	210576	291888	254162	242423	1939877	221981	207594	241601	266887	234858	220515	270259	287364	2157116	290258	202735	287708	233067	250312	269870	241328	288692	274758	250439	247308	237601	1640488	244918	281498
Carboxynorspermidine	356114	326605	326525	422570	325793	421899	366120	355905	444255	397745	404287	408213	429391	287327	394861	451367	396582	291979	410240	434263	428794	553994	423732	423866	410749	334485	386372	485581	357900	448917	439867	563781	406782	426550	414206	457458	446863	478398	291706	463847	429410
> limit Esi+ 7.082	371278	327664	374230	371721	309823	380168	361124	339891	379092	327883	368694	371159	384406	353398	381053	379260	323654	382511	376030	368227	368846	379199	378427	385711	326233	330949	363637	379393	377986	384073	370472	364890	370582	362902	362759	375704	372461	380237	226960	369758	360007
C11 H25 N5 O4	365042	345537	392912	402013	311918	349072	401109	377662	404684	365532	363444	341775	349174	286770	349939	385978	346123	323042	414663	423015	373194	405914	327374	291834	328503	323151	363432	410875	282578	346912	376026	356170	400850	413569	399327	414041	336664	380480	240000	326571	375489
PE(20:1(11Z)/16:0) Esi+ 2.188001	879124	1117644	849131	959125	956843	908763	860747	939007	871842	988146	843774	927841	927426	834999	826859	839277	1031283	912245	823941	891466	751429	798099	850762	951634	865974	728814	810902	690578	940649	997788	895935	870297	792015	808681	786429	897240	794286	836344	711026	1000762	790261
Zopiclone	394293	134455	148625	165909	145704	157637	176292	136889	189868	153618	279373	146410	144204	127222	153326	120153	153867	127386	157741	168327	292843	155898	121219	138414	154023	162882	131507	147513	136515	131303	299263	131515	128785	144362	105294	140015	147339	137601	109375	121067	311831
Glyceryl phosphate	151545	135901	63774	157498	163848	91377	138674	178118	214821	101466	137036	369474	112978	281938	100823	280205	92901	84764	80558	224836	152250	42111	96772	91069	57897	63252	88562	52959	105615	486642	146784	256680	50882	179932	97795	176312	150844	162606	71183	380090	151657
C20 H39 N4 O2 Esi+ 1.2879993	806161	743433	768030	726793	868090	744692	867321	677687	879254	793325	844918	789823	880596	805397	756103	732230	903727	711875	842347	801264	767964	736902	778779	735864	779300	741470	743491	780943	786312	758484	848694	726086	733472	754552	725666	809520	797037	742564	523655	809831	758481
C34 H20 N3 O S	156958	113213	117633	136011	106971	127521	126567	116689	129404	121353	159778	108666	121808	105663	121979	136002	106789	111242	127165	139134	240374	131865	144932	166076	115575	114364	109756	145574	122160	104600	345250	104571	114161	137406	117706	126908	135005	140005	107464	132105	464887
> limit Esi+ 2.122001	616574	531992	610418	617840	496819	697625	537833	449153	633506	571676	487145	634676	680890	489942	531902	510332	550068	503676	589716	618100	472879	579582	523353	502425	523497	571818	431576	632860	527054	600101	488046	541536	554942	489870	642023	567808	532196	690860	416128	512878	478748
PG(16:1(9Z)/16:1(9Z))	389516	389527	228998	381390	372796	363134	430807	394798	499273	328969	348165	386991	417744	311173	351782	306319	369623	383670	352190	417785	365554	223681	344603	328708	257206	188081	203131	431012	327242	329425	371670	339364	211198	494871	243301	379209	324765	324931	365513	338483	375172
4-Methylthiobutylthiohydroximate	429762	309332	437849	502527	289221	464772	463110	320932	541314	418187	416421	409875	406772	359805	366887	459990	327337	289366	489302	453299	386717	470436	373838	304254	360838	316296	342033	641373	303063	410262	391939	419847	442799	493289	452873	442421	411356	472935	189707	314152	341875
C33 H18 O3	381259	37999	39342	40704	22623	54090	56801	24890	63468	5335	269578	32437	19492	22042	26296	50111	21610	36883	50760	24906	298804	24230	31152	27750	20263	72626	35759	52394	40236	30647	324109	36765	22990	28571	5057	32553	19442	45987	41968	36576	362303
Nitrofurazone	243576	186347	282728	198103	138415	204856	235149	187099	212558	179733	252985	198710	345551	178274	270464	442341	153973	236500	471982	214421	255761	302550	231766	237913	293100	227038	278879	414415	253323	315055	257511	356192	300057	248607	295325	244496	212558	436467	72946	265858	248414
8-Oxocoformycin	132820	63934	280230	121955	56550	63680	166835	72351	83669	142136	168399	112606	126311	57199	162325	273021	93006	117807	443602	157434	169025	327404	161168	44563	251147	101483	157135	620305	104951	92177	168605	228269	326220	157585	233491	211236	56691	236027	26771	57289	175351
C23 H53 N16	204905	255089	452430	434609	186435	198612	441585	100725	406993	399697	253807	262411	207534	315019	209297	293125	286637	143255	427741	238616	261303	334278	239581	120250	168591	184350	242799	596959	127849	182462	193510	261805	367843	378672	421807	360790	151375	344649	94824	108028	261087
Dihydrostreptomycin 6-phosphate Esi+ 1.2010001	514044	32105	39247	53550	34476	51183	69189	37321	73167	3917	344957	34507	21186	14543	37638	49094	21125	37163	53468	37957	368711	28533	38083	21756	18057	83562	29473	47434	36918	25335	378904	62456	26031	40399	2505	56676	26939	60199	43793	40475	397094
C14 H32 N3 O3	410961	402533	456803	407769	421137	422404	424964	429210	416699	411336	413501	410880	395200	402072	397329	473670	388239	401392	422044	425731	383771	437480	400547	376152	412428	405831	418060	420589	403576	386894	408841	381687	433637	403196	398945	409187	416409	399778	301910	402089	381784
Cromolyn	321729	188954	330949	346085	150682	411972	313179	256185	408179	240904	319793	345132	478501	240461	356859	368577	179827	402114	432568	355870	313891	373192	374295	391760	231219	173998	303633	448375	346033	397476	315329	301273	350569	309113	323081	337222	343696	420318	88372	371650	307045
C15 H23 N5 O9 S	99728	46316	245485	50966	39980	44873	76145	36381	68208	42183	97813	39313	49692	22190	79142	159999	21681	24386	271021	84662	91874	292263	54656	25757	166771	87528	132211	429879	21611	44065	93112	178459	241582	91047	181121	47309	30666	270210	20762	19775	95902
DG(14:1(9Z)/18:1(9Z)/0:0) Esi+ 1.3940008	408258	419350	212410	420306	424824	385819	462409	410937	522289	353487	392992	406919	424423	339966	376369	321459	381262	407038	372140	431488	371491	226689	389868	355857	267597	188094	210277	435272	336760	344976	367410	344263	194041	535640	241111	414324	348984	358796	361789	314078	389956
C31 H52 S	289563	257024	344151	271723	233924	234590	366867	164513	387721	322074	272253	310284	254999	211108	260236	320059	227143	249833	409351	311035	266578	344716	281815	184235	313756	264804	296050	542622	175123	232419	263702	284329	325017	329033	335393	381950	250713	370615	142462	191312	270265
C17 H40 N6 O	253523	182960	207730	216364	297230	342781	367431	129227	448674	371046	228235	344119	638618	221694	363927	102368	264092	457353	215594	351696	233565	189461	462235	369189	138120	151410	141493	248060	384226	355785	249448	158961	154606	285576	158180	347548	197886	167088	98617	333063	257407
C12 H23 N O3	407582	375688	367373	364514	365514	385124	377485	364254	388717	364976	383022	371691	380928	346783	386883	386396	345771	420259	368363	381966	382225	370848	377842	372130	373672	379541	400091	372059	361940	387038	388990	356684	385740	352710	447317	373752	357503	368762	276045	365320	391716
DG(16:0/20:3(5Z,8Z,11Z)/0:0)	534056	644298	393002	593560	578449	645438	511274	563754	488943	584723	483221	477272	546213	466517	464063	451085	588796	530033	456462	524941	474684	403493	480951	522937	474337	375529	337629	421774	558579	532746	479631	437399	351888	513673	371683	557460	455222	454743	388912	491959	433475
N-Adenylylanthranilate	24598	16224	25027	28323	11251	536904	317454	19014	38948	15428	27062	29055	47883	21314	31811	417566	14086	36556	41096	34102	25810	32699	33973	39310	18305	13267	20993	46835	28772	35538	26467	22349	30048	29601	25446	28417	30882	41181	5422	452905	25302
Cellohexaose	97329	48961	183351	22808	27481	36045	71468	50323	40449	24685	97738	40158	90477	28080	92213	234522	14500	59609	214109	53291	95878	213220	47839	65878	168756	145130	172692	259636	68069	81525	97319	170081	199233	77695	185136	65107	37661	240731	33115	66516	97151
DG(16:1(9Z)/18:1(11Z)/0:0) Esi+ 1.382	1738276	1356706	2160478	1714190	66501	1665959	82452	1399388	1564409	67943	1711503	71722	1561566	1338700	1601504	1827557	1621846	1406552	2066690	1620089	1712097	59530	1492476	1497972	1811576	1888545	1980879	41492	1398908	1538776	1614616	1866247	2001385	1431462	1978054	80262	1384230	1860009	1028631	55387	1577298
C29 H Cl3 N O4 S3	345761	275157	366063	420882	288230	405522	386463	295279	418323	368981	349405	381049	372843	315012	372457	365279	356517	326766	470712	392011	355951	430701	388578	312385	309974	267808	323234	477921	282537	338804	359298	339043	382259	388620	379607	385703	377404	380382	191370	318605	367754
Ampalex	307173	203833	291148	296857	250779	244112	347617	202256	294124	389806	322247	289847	508695	153729	409978	448251	274894	477268	647518	402540	318263	349155	416391	282378	369298	233494	229478	410569	400676	319595	321930	291753	281706	255051	261162	275551	195548	434200	67504	203472	315627
C6 H5 N5	213794	116773	171946	220045	227143	136297	88050	120801	98301	467786	206203	214874	158792	93522	195426	316113	269522	340424	396263	215787	202295	290404	181372	236035	371324	222400	124429	157411	233133	165514	208273	211304	91027	115932	123472	151025	173391	126780	120365	169219	169254
C22 H47 N6	112596	99486	91127	73962	105742	85598	90190	459184	72986	59865	127423	91173	63012	170694	106524	316427	76762	68491	65736	152636	143346	85879	50383	53715	45677	54401	170611	81187	57600	52594	115712	52261	172645	56539	79714	60301	263941	136947	111334	137380	86984
Palatinose Esi+ 7.713001 :4	5453770	2961561	8696723	3424981	2445147	4643870	4774568	3087502	2616100	2348039	5291581	4426099	3048829	3953823	6901566	9899615	2257343	3229095	6940847	3116539	5211451	10200000	5371483	4179974	7783384	7698787	7903456	9209854	2400959	4598319	5207134	6168022	8107576	3565835	7808131	4322659	4870464	10100000	1885376	4240892	5153026
> limit Esi+ 7.0109997	419543	422255	382895	408273	429742	379561	386663	443366	367890	408873	420777	390250	376281	407095	385755	398007	398996	393489	362314	393653	419155	387505	387397	417492	428140	443293	395743	416897	422671	391084	421135	417826	382043	403475	382680	424538	369843	367796	395972	377913	409549
C23 H16 O13	223485	220180	217825	129766	170988	111204	146241	195096	333633	105998	214724	92402	145717	73368	127333	326440	84953	85693	438519	264402	214133	261423	90302	84138	236731	154650	213170	484548	106210	102429	214218	353615	291225	402814	324107	114888	84636	324933	173372	77488	216336
> limit Esi+ 1.6650006	494621	526371	462539	457478	479539	545734	458732	498049	470245	487851	492264	534301	505110	541634	470514	471981	520686	533970	474368	483377	499179	423024	513425	589095	489802	318427	407530	513486	546303	530246	483965	542058	420428	519025	462666	471987	551736	501493	506674	558947	505229
C36 H65 N8	282752	257251	496858	528460	316687	348538	410511	186621	293345	458915	283031	359943	301740	366304	348718	237982	522754	260260	275946	288825	277217	372675	380689	220490	225109	285081	333009	313752	223848	238135	271616	239785	340038	313103	356619	484577	262574	255357	144667	221771	279485
L-Galactose Esi+ 4.9019976	876657	609203	752889	682457	464901	902121	725862	667971	791086	467945	889280	756751	1113401	652032	1206866	1317844	411842	660782	1180648	666682	843205	1060757	925794	603069	919161	624487	746532	1930699	656182	930257	809434	850977	1158829	1196747	1014713	707862	951042	875499	219855	548234	859158
C18 H38 N7	366763	360253	276109	532563	298501	300664	437919	273964	441251	470191	328569	302088	309863	234683	301723	288699	386027	243765	296587	491172	331639	379264	280096	240606	239575	259568	302705	252120	261214	246243	321918	284963	325264	352127	304928	410520	299232	333811	215370	262029	304702
Allantoate	223078	565360	261557	184812	187442	120331	149730	290425	137733	183702	220311	97841	113066	91986	82477	525940	260029	110586	219411	150262	225629	157309	86587	109329	201880	95507	181906	267323	143993	154357	238575	376637	197938	296710	173232	163555	129339	161635	182830	139763	241859
C37 H23 N11 O4	351589	383228	433560	469415	390794	433311	456357	395431	500519	436889	347376	422948	440957	368871	425469	389337	422219	390570	450691	478339	352406	445913	398623	392795	426909	392672	386296	449114	385446	376267	351471	369419	394042	430149	366204	408044	391746	397599	277319	363582	356732
Actinorhodin	143015	81522	239638	127151	80560	100439	110790	61201	181538	120264	130710	89678	163902	46629	103644	170961	51779	64419	434843	145551	139414	222931	77257	55295	147367	74329	127736	528852	70307	89432	123370	233302	243786	175548	194637	97062	63902	254681	32106	45100	122386
C13 H23 N O2	525619	472674	438910	502989	476123	424444	526534	374646	560626	488494	506690	387239	484710	388496	428884	311848	483009	462256	496186	573353	496390	717068	414269	379153	470053	481122	377425	449115	478309	372574	489899	409677	402507	489446	437353	482856	334376	407453	388560	382022	481623
D-Aspartic acid	213616	128774	266912	232774	162816	157176	217599	153189	164638	252270	228155	181440	197366	58513	223907	353335	188716	258682	539089	346824	214098	347588	201115	120486	229836	173104	179038	404071	193841	120794	216255	322265	318636	197823	283558	218212	79616	292379	58195	88270	228114
LysoPE(0:0/14:0)	324669	439150	116739	288817	408776	238474	341827	405219	585584	244588	336194	240463	602211	201205	317121	300750	209018	404754	371859	428952	317615	169304	288744	259483	244938	149946	170631	391208	471383	409239	308649	248230	169607	495494	187077	366342	216860	340300	310512	256190	305039
Chinomethionat	259856	161759	306077	288527	135625	256815	256690	180281	249159	201438	241899	232194	303769	176043	283443	376912	160201	212089	459129	236470	251261	348596	252132	207010	226865	190666	252346	549505	196246	251956	248659	297407	304025	257318	295836	282740	212020	354710	55796	192553	216375
Gentamicin A2	78345	27744	124303	48552	13019	78976	34610	28681	25305	59390	80228	74017	31405	54083	109441	178178	44753	47179	466380	39749	84426	244634	93661	18534	237804	57761	131120	322302	22832	72625	85450	108311	175313	53169	204691	31048	84227	170052	10990	71335	84000
Stearoylethanolamide	109142	67811	45648	85510	58267	50337	74276	455908	88098	61907	108711	45496	65358	154879	55592	305724	38275	63968	56751	148157	103423	42250	38277	37219	25354	18696	160185	56159	34399	32326	109186	31840	129209	50410	45101	49424	270530	89461	39806	95244	104881
> limit Esi+ 4.494002 :3	761733	731709	352469	1429623	1019749	787363	1465289	854539	1049890	1161323	768272	772539	1490481	470561	1061320	506112	966799	1092534	1015011	1550952	764259	527720	1058625	536230	291166	118566	298147	716981	832585	750803	716032	364572	451043	1309466	424917	1375361	515992	561844	281742	566119	741462
3-O-Acetylhamayne	398345	372458	345497	356002	426190	361479	434675	450215	402251	316682	402986	292182	237052	295725	381649	355428	358618	186949	438008	410853	401806	360240	289451	114752	312176	266717	279750	505486	145704	108591	387162	362165	327515	452306	378266	412576	350492	348251	313448	47411	408816
> limit Esi+ 7.1730013	393868	2740036	357318	350064	2789649	314230	371237	443724	320801	2639452	392737	349491	282388	408426	360459	358722	425377	357317	300193	353853	380910	338750	323156	343838	453971	2844934	414383	299664	406945	332539	346984	381101	349209	362741	351028	366709	352692	343971	2204348	359826	401575
C20 H39 N4 O3	519617	495678	471183	535840	539353	502966	557441	444060	538845	508711	499903	522645	552249	501872	503532	461137	507798	514201	472666	524728	481173	455035	521956	502239	436638	451721	451930	460741	486435	483046	475292	460727	462423	477063	454155	504547	426769	478637	351297	495383	453954
DL-Indole-3-lactic acid (3-Indolelactic acid)	210081	157219	323283	225730	171770	109691	293703	166439	234658	217519	237076	181868	163159	119191	254504	360378	167344	164747	426573	259719	238506	436247	174584	98631	287820	179861	249427	559883	135909	133882	232696	307621	393706	294097	359573	376006	100812	228176	104992	125291	232641
Luteolin 7-O-(6''-malonylglucoside)	364815	263580	379060	385691	186670	457211	356884	279398	453206	262784	360558	390135	538766	314320	406112	420810	209306	454320	487745	399824	355093	428581	431108	443359	251748	212201	336631	499596	386515	440729	355036	331948	401428	345620	358969	368828	386346	471499	104392	405823	345107
> limit Esi+ 4.399999	251874	263746	103387	484569	376532	247047	465027	287197	612785	391472	257760	245469	567544	154722	366850	146366	318876	376320	310762	515009	256756	146886	361597	186101	96717	52404	86078	218455	319921	281730	239996	110393	126174	440169	120369	536848	156884	168415	113768	193214	246528
> limit Esi+ 1.7000003	304427	285292	236113	486833	318740	222670	494908	302335	579044	433486	291930	252331	413580	144138	304242	261129	313317	337059	534064	560359	285897	349418	285729	187809	188867	141442	232773	317801	254509	260976	292071	201299	339657	407473	284951	492997	156787	269615	219915	210375	284994
Cellopentaose	201143	80649	374938	162931	51362	159727	101894	81398	74535	118896	207152	143312	198671	139497	134674	475383	119743	117308	513608	92299	208631	376114	158410	110510	335240	254052	334467	563635	147992	139442	212773	390440	396393	134970	398798	89825	162447	477096	66545	116743	218473
digitalin	486840	540855	550807	536430	541706	527630	518777	485971	523967	538909	480903	548479	558162	531962	527529	469280	539153	544422	531959	526551	470966	499745	547213	544109	550511	516858	530262	520319	535365	540961	463562	544110	540523	525548	524982	549756	514316	504097	427929	518222	453897
C23 H13 N2 O20	486252	493597	449079	467862	493276	438150	441582	580043	430582	462638	487114	453697	431595	475480	452862	459788	455282	451774	411904	446365	486432	435026	439646	478535	481777	524015	460994	464703	476818	444755	480968	478857	444473	457477	450917	484859	428203	421924	374507	442066	475972
> limit Esi+ 3.610999	990106	893234	1365555	1014775	800748	957731	1153314	830053	927964	1063780	980593	930569	1184200	892043	1087895	1050855	1003040	744723	1504780	858155	935389	1262387	867694	688157	990841	914774	1274620	1648418	801467	981481	920811	1407672	1260090	1004685	1222385	997570	856713	1146976	644244	877713	915855
<none> Esi+ 6.761997	518778	454179	540891	569886	459781	562534	539960	457500	564507	514956	511833	528093	521266	471715	534824	521776	493588	482350	596746	529421	508696	565216	521952	458010	467099	423870	486140	604977	433378	485781	491021	488441	523486	519742	530119	515707	509221	524889	340289	463175	505020
D-Galactosamine	500275	343083	435891	389718	221243	541758	417843	376422	453069	231445	520256	314417	592079	384123	692775	797833	229076	380566	663033	363487	495904	646801	579092	381252	552845	373735	457589	1074761	378300	538474	486897	505728	636841	657666	555500	445756	598201	547709	126833	329126	520175
N1-(5-Phospho-D-ribosyl)-ATP	492965	496566	447011	475054	495249	446030	446638	508186	435617	489539	496138	454112	425027	464579	451364	466635	460473	459274	416377	448250	492498	447372	437074	484714	492926	524790	463210	474107	474432	456840	491637	483516	445461	463086	446840	500556	423032	436292	467901	445598	480393
C29 H45 N9 O2	174185	173957	171388	351286	233592	254936	364011	188330	552486	276524	164724	155585	375134	124133	209675	245187	347255	475133	279010	424927	171264	261927	211909	188633	155036	26543	159254	189884	271166	147250	152059	187890	111528	330888	101818	350423	163327	293706	149051	105039	172492
C13 H25 N O3 Esi+ 1.4799997	581600	524757	513860	455412	456744	500049	475447	598782	504017	471236	512708	552553	504363	475740	499627	532601	437818	581274	490119	559164	513393	535466	483503	535822	453542	461876	526282	536526	473882	491032	552918	508467	487298	471689	566278	491038	500131	483870	350227	500107	556250
C3 H14 N5 O	117748	107166	119275	112083	103436	88463	108811	67623	102720	137663	120370	79358	104176	70562	88076	112180	117482	81685	128922	123057	99380	125103	81816	74130	181656	294255	79473	111071	182215	76539	122195	86127	93919	80884	169422	101169	67411	126416	86859	63940	116118
C23 H19 N2 O24	495468	429342	485401	478510	398429	497397	468739	444574	490098	424667	477839	479126	504210	449986	489109	502578	416600	503640	494955	491407	489218	490917	495614	508788	429695	422823	472909	505776	491240	494583	477229	468339	494877	462469	481230	487672	496194	503940	288739	486341	470130
C36 H69 N S	402904	422603	468022	577496	411692	478415	546729	319098	501689	583112	387090	453456	430053	376537	463063	365507	526673	430978	475654	495403	383510	494664	441356	394672	334294	305860	397516	386504	365360	445124	378021	387970	395939	457791	403056	511263	337395	422139	270737	432368	385289
(S)-Piperazine-2-carboxamide	1483871	2674339	2699684	748531	458051	2033691	2316873	2294283	2070203	1970321	1991074	1757161	1782633	1529971	982328	1884543	1598121	1578117	1932922	910870	1586139	819114	1321525	1268513	1424516	1359521	1510361	1734655	1072928	1447035	1390055	1459455	1590344	797012	1530614	1524430	1221624	1427913	976577	1240722	1307230
Dimexano	496687	421165	519155	574161	424108	548718	531667	446604	556967	500715	496287	520006	517243	446634	517222	509076	475038	461156	611948	516914	498560	561159	517704	450934	444242	395304	461260	615800	415446	466363	472645	485147	515333	504974	516607	500791	499375	525714	314398	444503	497652
Lasiocarpine	298524	414297	193245	321804	274325	178172	411295	427343	422428	217927	301185	178767	232300	89979	199100	465226	140507	159461	510466	470773	294616	239242	145198	141062	235759	138776	170498	530637	145827	236219	287381	343756	273597	622228	289168	336848	127877	274360	129787	137309	293934
Beta-d-lactose Esi+ 7.7109995	852076	517527	1233202	358167	422022	688025	676309	499432	394943	382433	793879	642727	523213	607129	655733	1343640	374804	552605	988806	473116	789488	1322403	801553	695482	1087387	1133478	1092892	1229717	494837	695788	783058	908116	1079089	531137	663902	487014	710937	1295136	304558	642294	766250
PI(18:1(11Z)/16:1(9Z))	409071	447578	356060	381525	434982	390165	407910	410481	372605	375760	378714	424317	374518	431725	448846	381964	392704	387407	387806	389936	378774	342557	424455	385319	387092	340101	338218	388204	378834	341261	364150	368515	338630	377477	347754	409776	393997	348552	381043	331331	352202
Anapheline	518558	514285	599443	572505	452846	654495	484471	458174	428410	504280	382494	556976	308269	484614	474464	377167	486580	345336	351216	357850	311578	415046	461710	409246	325100	403908	349016	324470	344665	215048	355499	249564	332381	263559	237889	248018	350162	267781	337543	304078	274459
PI(20:4(8Z,11Z,14Z,17Z)/16:0)	541014	435318	561604	547739	478483	502203	316206	526651	313463	531005	519803	474080	444679	446691	461699	438459	350007	367107	375783	492100	342550	685704	299863	444995	400471	453763	293901	662359	403194	522362	537140	284816	548990	509648	330095	509231	356288	388532	364789	430739	310444
Jadomycin B	731864	100261	109951	130687	89330	114290	148203	112282	131646	85186	512811	90869	94852	80745	108272	119167	84971	104174	126809	115258	544202	104901	129491	126534	89549	129238	91641	129199	102488	88768	622836	117679	92815	117765	84349	121295	109649	134059	103388	117529	741461
Flecainide	224098	65228	497038	167826	58346	250009	191303	62925	80742	159712	210252	237327	194662	142787	312596	324586	100473	156828	405109	130849	215139	559361	287553	198181	380597	216104	275011	571867	106594	268369	200635	301215	383788	74771	277117	133910	197976	502984	27509	131710	203559
C11 H23 N4 O	531096	579820	578698	601052	394857	490378	392315	476933	392330	592293	508774	699124	443424	617622	490231	689135	395765	631618	554784	398025	664985	763798	613645	670087	379427	311996	505348	543371	569875	673530	501162	597885	630651	431033	565639	479770	642279	594091	456148	545616	654351
PE(20:1(11Z)/16:0)	458440	371747	468767	646346	354086	570458	495820	429238	318403	640362	407909	493156	304998	437350	444549	911874	699328	358031	388443	385554	384625	486366	457472	506464	343992	260481	423138	297697	302388	534876	419048	406871	350924	355334	407266	503829	492554	569328	297346	546947	409814
Wyerone	386580	304256	418157	379387	318395	288188	320928	304009	482943	317783	371799	289669	307366	224179	275102	469134	245532	227142	602867	400434	361020	474271	271319	217215	339547	257831	351886	640316	218494	280959	358038	438527	415829	400286	428287	331372	253468	529859	169466	257067	368200
Glucosylceramide (d18:1/16:0)	630309	435563	383132	589534	520473	590204	557324	454107	520769	507635	486162	643549	688685	690923	606187	371481	696452	577033	455113	482559	621435	317999	737048	526404	359721	314402	358899	497754	608178	471225	476097	444397	366862	582750	388219	517869	507084	423541	390642	514628	497122
C29 H46 N2 O11	440931	424645	261442	627429	493200	367993	747345	453180	803099	569898	436680	378481	840659	308379	548791	350350	432464	551092	619565	704872	435461	359245	490195	330553	254430	198894	234453	338957	493971	443669	423852	305210	320925	659768	313908	738246	292111	394486	549295	351259	421847
<none> Esi+ 6.7629995	534322	456219	556613	619705	463612	609614	569501	480387	605734	556421	546665	560686	561361	484575	547911	558929	521681	500045	682942	575896	531923	619852	567945	480036	483971	426648	512096	686852	446789	509535	532904	527363	562550	569482	567885	566983	552490	574367	325379	481777	544916
C27 H19 N17 O3	705726	416934	458802	509438	391652	465677	506280	417188	521912	433774	611759	435455	444022	363219	435151	443741	412980	413854	521551	504061	616536	463121	459854	416040	423171	418726	397910	507255	411279	403158	631990	415070	417153	452766	385928	478499	412774	454523	303834	393853	671438
C20 H20 N11 O9	669064	587637	307343	212440	567030	644691	444762	562345	385880	491277	613408	614568	484175	693124	584657	648398	551889	536165	487908	389025	630047	262661	257280	680226	686401	714236	692985	232994	604257	647665	627734	671635	324739	493209	645779	492336	342456	240499	495182	675884	640533
C5 H6 N5 O2	353688	286189	357375	529401	362376	412041	425027	387296	201173	581633	343200	432876	168524	354130	300025	382927	708200	305169	279735	313053	345854	328964	321541	525630	402817	371921	338422	277718	147073	462381	349205	315542	277498	232684	321045	489086	436744	313729	231668	474113	345104
Salithion	582230	434130	590591	577262	378210	666653	579110	458903	650475	444848	549117	778450	748609	509512	610632	635005	401708	654680	692051	597968	546187	644571	637535	642390	437956	413414	532405	717706	576851	648360	532896	518351	604377	526223	561724	558976	584127	665841	255480	601950	521274
PE(15:0/18:1(9Z))	808387	929345	451740	669869	732897	729498	716430	900048	1177522	523555	805644	814662	1143544	641399	881812	865069	559163	918967	840513	960051	745634	473529	694926	851953	725588	466788	486553	1151614	1054266	864946	754216	750037	543237	1195064	602567	666069	680614	879049	810493	668977	733847
DG(18:1(9Z)/18:3(6Z,9Z,12Z)/0:0)	521196	430275	760567	528900	462770	611412	430263	353679	503156	475220	629446	549901	397334	386692	492472	736273	478891	479709	809475	563855	627162	885912	417464	499333	712791	743530	723076	911000	444967	497355	564788	692202	804130	506800	745876	532951	510848	684099	259010	452505	586122
DG(16:0/18:3(6Z,9Z,12Z)/0:0)	650816	591588	619285	675073	588697	612455	682410	603566	741160	632097	635923	598378	597389	476835	575181	748302	565269	498657	805663	687716	625200	690484	514419	529738	650856	530189	560299	954411	486635	599018	631416	688085	604217	718688	642377	607415	529531	739637	478038	520630	624407
PE(15:0/18:0)	612465	686724	361198	369351	494377	554112	428864	646525	712407	331738	584503	534846	832251	561914	590059	646576	296856	720606	631061	554844	584237	422672	527289	648261	636669	494583	394013	812756	839384	700502	581241	652905	450587	742927	504178	390233	529252	706295	617867	548563	569438
> limit Esi+ 3.5969996 :2	646948	419029	1381127	546194	426363	488094	470924	321072	375339	478989	623750	512825	453425	326128	633472	1072323	357811	280239	1256106	506762	609836	1679191	293729	349579	948695	1108215	1265767	1354851	377595	553871	635379	938929	1442101	297888	1220734	375903	413635	1007917	328455	492617	598737
Phenylamil Esi+ 7.416996	585628	452698	1024095	472764	435261	354421	491945	340447	714976	527658	603013	310325	708623	209895	494017	762238	288498	322136	1591209	657823	592529	941558	354714	248194	707643	404460	662944	1719583	397276	401013	593352	1102003	1041607	763572	851443	360370	228524	1173479	193258	185712	564289
A-Nor-5alpha-cholestan-2-one	535760	483832	496539	631519	508156	558693	534660	460482	620645	595462	525266	510021	559276	476867	560669	620298	480223	422883	569774	593020	522730	597426	483322	576606	542191	541365	431039	461276	487399	508027	536330	502228	508240	536809	565220	618188	513180	523005	302871	465583	514310
Pantothenic Acid	386061	330697	306922	637157	275493	457697	581782	363146	490304	531296	376556	431536	339014	332310	396158	376945	441272	288525	392880	443459	366170	321924	450549	285321	250386	173359	257203	400225	213083	368235	374996	299631	321760	417475	278099	634824	437755	303368	157565	305749	369433
<none> Esi+ 6.7640038	609224	511578	652313	719065	517291	694557	662748	539791	705443	643577	620515	658073	644560	552920	631360	626607	604350	576532	785334	677522	612882	714847	660280	540251	539388	476445	578103	785128	511130	586405	608827	603263	650182	651954	646690	654009	637667	650981	369441	548139	618174
> limit Esi+ 3.609	1754727	1733186	1901240	1793117	1600655	1556562	2106731	1558269	1790637	1801417	1500762	1535784	2018055	1495044	1675675	1283073	2136533	1704417	1784945	1636960	1457820	1403958	1473027	1310075	1327239	1364726	1695850	1505863	1691227	1638929	1657686	1878524	1676509	1633455	1661739	1691982	1276544	1556064	1205623	1622387	1583443
1-methylhistidine Esi+ 8.5570965	433497	256692	1602880	1068035	814194	911099	512895	504840	323016	921944	1221304	875153	429655	700871	667964	575706	847848	710950	13567	666033	1232714	1477954	703745	771473	499336	1315760	1579757	254751	30748	1048223	589475	6983	1319118	285484	1176611	2062870	752421	465170	15457	1004045	1220098
Mevinphos	412051	110493	813708	672934	254977	692689	511086	178502	303913	391315	394727	599086	283863	404186	660251	352886	389870	322254	303396	287087	415687	775770	589760	234434	228688	516842	599514	774085	201970	207482	417024	145794	773934	340824	720980	441621	537420	264660	65215	128223	409591
> limit Esi+ 4.494002	762461	732843	352469	1425768	1019643	789096	1458948	855245	787278	1162123	767224	774371	1487757	470354	1061042	506340	963925	1089162	1015382	1551138	763968	527720	1056416	536230	323600	118566	298488	729637	831600	752844	715783	365202	451043	1305748	425193	1372686	515721	561844	282025	566434	742583
Aflatoxin-M1-8,9-epoxide	497710	343979	514062	638150	272186	665660	497370	382709	792026	341898	495244	543839	927196	434141	667414	719512	316053	751627	805915	706258	490291	690419	728450	798111	350517	306081	572510	861423	657929	771731	488324	563772	666767	501515	589805	636123	668363	814211	168643	584692	579043
UDP-N-acetyl-2-amino-2-deoxy-D-glucuronate	704526	608283	702253	708314	564491	737958	681539	628763	724668	613356	689711	697548	765509	661320	706595	725465	583981	739075	732410	706002	692867	718542	716262	735930	601698	603056	688022	745713	712149	726776	695019	665728	706568	670491	684177	699847	693125	737344	411197	705035	679361
PI(20:3(8Z,11Z,14Z)/16:0)	725526	533387	362706	510398	481608	421272	386744	470063	563388	512676	724691	673747	531799	667239	364815	696296	429387	402155	479579	453836	432049	512277	369241	823073	587798	492318	432873	368616	600596	424792	411853	476640	443417	614824	495875	610178	644186	617966	606132	396759	655716
C22 H16 N O24	632082	3891613	566581	552675	3966499	508849	514950	4009782	513849	3772448	3788679	546764	492687	647168	573142	565191	3660851	560701	449148	560684	602751	539771	502941	549898	3915395	4074167	648061	434090	571127	518947	538371	594482	544308	652381	554321	572878	556903	545973	3110765	556199	631508
> limit Esi+ 3.5969996	1097126	998836	1884344	873995	975566	788283	1003941	907061	1082451	1443626	1056310	823950	1172741	804322	821857	1383540	969596	803912	1533654	802669	1074322	1799796	649777	849040	1404128	1475859	1717092	1540287	1003581	1236858	1078184	1699133	1777146	842229	1581259	824078	729135	1466299	476189	1124327	1033515
6-Methylthioguanosine monophosphate	259641	271404	260990	165071	220996	151002	185464	237076	392318	139373	260848	124711	191424	107077	171245	379838	120122	120131	503816	306916	256500	302987	125335	124130	279291	194817	259052	558824	144130	138999	259416	421247	336546	465880	366256	147139	116927	386099	220898	118941	259499
C19 H35 N5	250022	314658	244306	225849	407870	227357	320944	317445	314539	269134	244427	279190	332451	272261	265522	488158	295769	345278	239270	306109	249363	223358	271230	316549	402395	412403	325710	220991	381867	346893	233835	295381	294803	302329	310469	276947	325790	314093	289820	302082	230932
L-beta-aspartyl-L-glutamic acid	379943	278573	848545	320589	272054	421475	359048	271577	303317	247635	380319	446681	281350	477619	353664	449726	298189	148433	433404	193723	377109	627413	290664	231385	547227	652524	797888	710371	151681	323017	398376	415043	823562	341437	824769	456399	483417	447753	352311	289588	379300
C7 H9 N4 O	410271	327735	570937	361041	272718	244890	514407	348906	389898	311038	424295	336948	392700	195574	389094	634148	224759	383152	690489	513275	416200	707281	291565	242148	482421	321151	416521	990937	307094	322064	422477	492242	733367	551214	628590	579624	248162	473247	202181	244695	427501
18-hydroxy-9Z-octadecenoic acid	742933	721519	798450	942065	710462	709989	941545	571109	934250	890276	731837	689537	812246	522935	729929	663371	762410	751561	1055710	1017618	718337	871143	674023	605380	724149	656252	741630	788176	668928	650952	707585	711149	772874	775914	777172	859691	517480	729388	455633	624310	726033
C20 H32 N8 O17 S	587590	293281	590065	627358	198229	902745	521873	439755	483975	558474	576934	789044	657321	723210	627909	626966	571901	603118	554768	490472	599591	321253	737448	843837	647374	515083	616041	545812	536951	881787	594106	591030	478482	374849	537753	441407	837946	703169	103141	852982	593779
L-Galactose	877776	592374	463792	687003	356085	935689	736688	628252	755148	376245	900430	500980	1021464	672866	1230564	1405165	401436	682703	1186376	633935	853032	1135100	1035514	687585	962993	641827	807550	1907447	675927	944482	845139	885923	1142133	1117994	1013296	779349	1054131	603701	114865	585917	907459
Salannin Esi+ 5.507999	729796	250172	222744	1102981	726273	569461	570540	330205	686317	961248	728827	658585	1218498	432082	812020	1299392	736178	918506	515383	572165	706775	269916	745384	203410	192919	126683	195927	2067572	628678	633230	698629	237523	314951	1325788	288374	1244813	438319	270767	184274	542071	714800
C12 H6 Cl2 N6 O4 S5	668179	542963	707202	797444	562744	768089	734319	577605	784259	701869	677168	718407	724494	590068	708238	690374	665704	627265	879521	744707	682190	796786	724238	595860	604489	528997	627623	897533	551726	648110	674664	661066	727476	736862	713760	719355	704631	724898	376599	603070	701257
<none> Esi+ 6.7650013	632899	509052	672789	784727	531320	763583	707309	561930	772873	686127	664729	702377	693465	576551	701278	675937	646912	614973	871972	726923	666132	798736	719908	570032	582278	487966	607708	878800	538088	636070	659678	639973	712017	719992	712034	725627	700319	721365	348819	587858	671098
Pergolide	241003	190694	669167	414968	204002	274727	459854	144552	336216	485164	387980	250371	534170	173309	432797	421032	260613	248680	884938	433286	334586	782292	348680	224638	417340	272465	427977	1069859	211705	421455	385762	502004	693022	374048	533629	472404	288444	777524	68524	199625	417602
DG(14:1(9Z)/20:0/0:0)	1212597	885204	1583659	1079377	872954	1180390	1041409	761253	933124	987612	1150403	1112694	920590	967767	1136095	1358370	1029819	951071	1480566	1001481	1109213	1691714	995180	959330	1332915	1473140	1467638	1549972	828879	907767	1096692	1358102	1476028	750772	1480362	1007341	958115	1362514	602810	926506	1014462
DG(14:1(9Z)/22:2(13Z,16Z)/0:0)	733670	599552	933325	796790	638677	753900	690866	521364	665225	711683	682099	639736	663213	586661	694686	913732	682518	532852	988723	615838	722613	1062499	568499	650009	873178	717800	865915	1058419	502607	689990	705131	910041	850322	703617	880959	728935	689877	845516	393390	564609	671040
PG(16:0/16:1(9Z)) Esi+ 17.078997	1224608	1284458	1330094	1205216	1201113	1189396	1745936	1203229	1716688	1189737	1178151	1222229	1167919	1231326	1134067	1189381	1200869	1207771	1174337	1216805	1172784	1221320	1757807	1189565	1187206	1199881	1213411	1216930	1175187	1182445	1751062	1187090	1219262	1758080	1198797	1212357	1717596	1199506	1154309	1709265	1685248
C13 H25 N O3	650249	516882	510221	618020	559455	497660	617589	422841	691938	610938	636641	450079	583142	455949	494102	363190	574581	536223	608926	669332	617366	825808	457502	442721	557871	559705	404220	501929	575399	421424	617999	457634	482052	575940	487927	531906	379465	451183	389111	482246	610234
DG(14:1(9Z)/18:1(9Z)/0:0)	560408	438366	781214	962238	618563	655835	793587	359652	678004	835980	525247	693703	583474	644196	596997	498855	774500	465934	529731	595828	516858	673446	662334	394401	385957	478064	554388	704319	422822	426116	538372	464470	545095	665178	621480	910502	463275	528464	276551	425371	521422
Dihydrostreptomycin 6-phosphate	715973	825820	906980	1026733	837271	928502	975404	849461	1075246	944457	725190	905617	947677	790707	924925	809123	879037	809567	978242	1037951	718467	940242	843103	817351	917484	829015	805658	971908	799040	816750	720712	791409	835150	923923	776381	878422	827524	839107	575165	754987	711970
5-Ureido-4-imidazole carboxylate	316694	105987	71759	247235	410614	140513	143451	114433	50998	351808	306759	117274	295470	316429	181875	778981	239703	874603	291733	331770	296264	245568	262624	793207	88686	209138	18508	84809	1010669	316700	312395	924875	40432	35450	11895	166781	81708	546368	68430	577342	304235
C33 H41 N11 O3	463102	373956	468649	690085	424959	358406	789808	414991	823859	705881	461641	330426	839433	241679	533999	526160	493856	478890	1046514	723325	480057	675476	407393	263330	344121	271931	399092	705531	449810	492463	462908	447317	572861	618893	539334	714735	250977	583079	396329	351856	453506
C33 H67 N4 O4	735217	596125	854383	1088428	761064	842270	933223	425895	1000598	1019427	719535	945177	925198	964603	931840	602489	967830	760058	776104	776781	706264	856220	997634	617123	596318	672629	651037	813572	666418	662910	695505	714095	779564	848725	811964	1000279	625729	778426	377375	660001	689368
Haloxyfop methyl	872716	630043	874335	890285	476098	947626	830507	732859	955372	716172	837462	868206	1029819	800104	881931	903791	660276	931392	967290	905223	840625	903389	917359	931866	705548	603587	813826	982021	875643	930912	824592	798108	883772	801880	838223	850465	861569	954011	386564	874721	818072
PG(16:0/16:1(9Z)) Esi+ 1.4039996	874281	760815	599183	961761	847016	871023	954997	823818	930289	865876	838592	1025210	981499	927819	927141	565323	1005536	898047	711047	842916	788459	535519	1020714	786066	584221	495853	556515	744047	857020	718905	753976	794576	572161	859163	587924	890325	868171	641108	690818	875467	770769
C22 H41 N O2	1556862	1503552	1478343	1700876	1509852	1433765	1651066	1529616	1676302	1629988	1538134	1515828	1570115	1404279	1493240	1390447	1504658	1492144	1519047	1720067	1495205	1377570	1442164	1350910	1381505	1231101	1380760	1381997	1363626	1395100	1492795	1363523	1407928	1536533	1366067	1625398	1442030	1456778	1057865	1420214	1480410
PE(18:0/14:1(9Z)) Esi+ 1.6469998	924251	1134642	657098	620623	975163	861378	768130	1012157	817674	622988	841496	922779	806883	1078446	966668	753860	671546	982403	56529	875999	879496	512352	823983	992652	810207	850136	692572	58234	1019442	830361	853786	755418	597327	914880	784328	727741	941246	41560	1387956	802263	770341
C20 H39 N4 O2	907099	874886	805773	985220	875343	812649	931061	801839	950756	851726	890725	848433	930554	827912	991552	749804	845118	912900	863631	957168	883959	786520	850403	786770	788055	725317	839547	845134	871762	840399	863124	799884	792503	870920	790733	941220	780837	798032	583409	848690	879028
Megalomicin C2	741205	656761	477593	1320249	835227	740932	901575	754648	1610855	1207605	748525	644257	1342887	350181	885306	672098	879446	928200	1064700	1445562	745178	764247	808967	491376	394934	186114	314260	884264	765389	775398	703062	459145	432173	1058232	380245	1187252	424705	712063	277031	527950	734577
> limit Esi+ 1.7050009	456591	485276	269443	747530	546424	339066	877497	568312	1172195	629307	450633	427844	799969	219224	472949	339795	484049	661874	736877	1038971	440297	354890	479250	307980	248666	155978	253508	446919	444897	409222	438495	285783	377656	811347	340526	808265	227067	377468	461579	351058	435213
C47 H56 N3	1400009	1433483	1419591	1394745	1336264	903694	897555	1374221	1354036	1370335	903292	945298	1327786	959402	923778	1374150	949380	966385	885583	1357799	1365513	1355456	1328491	1336577	911420	1390395	1350373	1343988	917500	994502	1377145	910792	1413465	1393272	1369214	1450739	1426522	1322943	918836	902939	1364085
2,2-Dibutyl-3-(4-methoxyphenyl)-4-methyl-2H-1-benzopyran-7-ol acetate	959109	994599	863412	1067411	1044495	930075	1074760	851577	1161784	1029560	927736	942337	1089382	863375	980789	713803	952896	1036771	955978	1148387	932964	810126	1002912	913639	876557	830944	784407	821228	987733	941750	921413	842365	862301	1073191	844388	1076769	814376	848742	821524	879994	902989
Salannin	716608	478197	218855	1098743	724476	566295	901916	484521	933453	957512	711805	653312	1211770	428877	823593	262619	733558	914857	478998	802779	694138	287702	742018	231744	211157	145348	200519	2147359	622215	624629	683853	253480	297737	1316355	269924	1237829	436443	289797	238438	533753	705119
Azidopine	615678	269791	641246	684722	180629	965902	557702	429107	510536	583386	618332	839132	699404	739070	650267	701378	587685	625662	646180	515862	617402	378955	783260	852439	687107	497993	633265	649728	527767	927678	615637	646515	532296	386190	597849	462996	868373	782197	96041	870643	621514
Cellotetraose	475841	194660	172124	978422	474832	1046224	430899	178212	264453	806311	472007	1090258	211590	953140	912757	230552	769253	201933	258804	263615	470498	230227	1156590	427948	153145	159025	164390	265562	184352	341597	474446	221388	191484	154081	187762	504380	1155278	291666	92356	353910	498192
> limit Esi+ 7.0099993 :1	918138	1069762	852459	917027	1086071	832373	837372	1097666	825822	1030739	909243	850167	820572	876419	840947	885260	999179	855647	802476	846437	920466	843250	848264	905805	1075450	1133719	869230	912438	899163	849521	905575	908880	848942	881181	848753	957085	812719	821262	858264	825596	892441
C34 H61 N5 O	1186966	1193321	1052536	1225368	1082006	1089529	1422630	883993	2531187	1242210	1147947	1154592	1639255	1114472	1084557	1185602	954587	1107840	1529649	1544798	1129052	1285316	1174440	908517	1122956	925495	853043	1944590	990421	1181379	1107577	1309496	1059428	1995719	1217611	1374607	788025	1571024	721171	993252	1155254
> limit Esi+ 2.0869987	1618273	1394090	1836500	2205404	1273269	1765411	1693177	1369066	1577535	2025332	1666698	1647974	1706674	1239329	1514198	1748084	1873702	1620950	1985475	1349412	1352334	1915513	1384682	1661579	1498108	1281688	1641636	1982992	1419738	1700806	1487535	1799722	1735807	1311723	1708072	1970772	1538486	1823045	752847	1621716	1481480
DG(14:0/14:1(9Z)/0:0)	624188	654281	666426	576590	511977	528941	759706	452998	1172950	562952	612293	559010	830734	471274	506433	763954	427185	560909	966122	755981	601274	717940	543792	439563	715310	531515	551054	1406437	512154	648515	596216	749094	674580	995726	771206	712046	429234	949011	355013	468373	613874
C5 H10 N4 O6	748327	378401	814705	858418	304546	1123652	715131	520967	617739	693993	738147	978916	841939	814227	785401	907394	707399	746809	920245	660548	740321	635174	913429	906004	784311	558752	686884	975432	606924	1028309	735421	768543	720064	503211	729061	606633	966927	923184	179531	917814	724921
N-Acetyl-a-neuraminic acid	788116	576966	1095386	566541	484603	995169	670438	685340	556908	368464	782455	878420	777878	815849	802436	1042634	395875	584203	897745	592057	776645	925594	884334	882974	713334	709236	865511	829521	665051	949298	779040	832509	990351	865829	918447	677122	863326	943786	247494	883411	768392
<none> Esi+ 6.9770007	2911463	2950584	2751346	2789150	3039770	2625312	2622838	2896849	2607308	2749277	2731549	2635715	2575447	2903763	2615113	2506911	2719634	2635771	2281582	2554912	2689314	2457215	2579956	2778868	2747983	2887301	2676871	2133617	2786583	2528848	2600047	2558150	2437170	2491723	2485925	2316144	2549756	2536970	2822324	2659978	2602530
PE(18:1(11Z)/14:1(9Z)) Esi+ 1.6390002	1027724	1035510	689582	1127394	1176274	1229260	1079118	1007483	973960	863813	1076657	1466188	978004	1497395	1304821	714356	1125312	1010379	623174	890666	1040692	444473	1417164	1056344	745625	490867	593621	803320	1029719	927732	1016768	896468	567612	1145056	598723	1046324	1320330	737117	1450764	920837	1005379
Levofuraltadone Esi+ 7.7149973	620635	315133	1087770	363107	245056	521158	514406	313257	273873	240062	595568	493024	350509	428853	815084	1288577	231074	361261	868846	337638	584005	1377351	611043	474016	947248	950585	985572	1232276	270152	539328	579779	741432	1003445	382837	977193	474380	551682	1334065	208757	469083	594761
C15 H21 O11	402991	244869	158525	855800	581529	249870	696419	258277	826815	1095308	409216	311914	984223	160048	719630	165806	620313	875593	483387	924709	413154	357666	416264	176588	193693	125185	126473	279611	622980	217634	407366	178085	197914	499626	192661	692706	246139	193398	134675	182442	409967
1-Phenyl-5-mercaptotetrazole	323333	236136	355090	218088	2202	461574	590165	223459	1204098	64567	344395	257855	944986	305180	179498	126796	8694	457951	305058	240147	283261	473074	253478	666878	18980	223905	519606	210422	495477	207628	308857	110218	680188	277566	413970	372815	255626	835040	141660	360587	266430
Galactomannan Esi+ 8.339997	1201442	737050	864460	2050096	1311430	2492185	1823104	639601	752932	1528141	1211440	2548687	1428439	2179807	3073118	1211874	1437904	555820	2230515	1281161	1107755	1593258	2825359	1157636	1050701	1436018	950299	2437586	1209596	1052697	1254011	2123247	664289	575195	715172	1888085	2719416	1202632	270474	1025791	1252168
3,4-Dihydro-3-hydroxy-4-S-glutathionyl bromobenzene	1090795	940050	1109421	1103675	870450	1195539	1069398	957298	1187405	917343	1072402	1104120	1258574	1015694	1117022	1141836	874139	1175183	1186296	1109674	1063411	1142298	1145808	1171990	906742	911700	1039444	1214765	1106494	1151975	1062459	1011874	1098059	1034491	1061771	1066808	1086136	1195462	622834	1127209	1043390
PG(16:1(9Z)/18:2(9Z,12Z))	1000950	900303	935102	1034711	876217	961528	1040142	894177	1122559	958571	981550	911077	911450	713517	917579	1131799	877102	768342	1226102	1038780	963482	1041785	793891	822383	975937	778027	867042	1430659	748815	911786	960303	1066069	933915	1085257	951275	917706	821619	1134749	756220	842464	988575
C15 H17 N3 O17 S	1121946	948591	1103547	1111289	881453	1179033	1065798	970605	1157286	945744	1088430	1104643	1233103	1027976	1125807	1152513	891817	1160841	1179103	1105488	1079367	1140674	1138159	1172099	942603	928998	1064853	1194266	1110350	1149186	1078299	1045100	1118041	1037289	1085011	1085826	1106941	1171647	564315	1126709	1058994
UK-47265	860967	381354	907003	951346	283333	1239761	790984	566619	671552	787484	824847	1101310	948632	933926	870934	1033719	799441	843101	1059233	737357	819226	709645	1014939	1044010	931558	628446	802242	1095552	659531	1153377	853014	899208	832092	555405	845559	697647	1110652	1072270	161005	1050870	835935
1-methylhistidine	411929	270094	1602722	2091880	814194	1935477	843968	504621	323016	868284	1221063	1825929	442478	1400444	2048981	575452	834780	710950	297623	681970	404118	888198	2102956	252507	499127	1315760	1579757	254516	191251	1054370	384890	4495	1319195	285484	1176611	2062124	2214931	468795	15457	1004045	1221870
Beta-d-lactose	852076	517527	1233202	358167	422022	688025	676309	499432	394943	384583	793879	642727	523213	607129	655733	1343640	374804	552605	988806	473116	789488	1322403	801553	695482	1087387	1133478	1092892	1229212	494837	695788	783058	909401	1079089	531137	663902	487014	710937	1295136	304558	641862	766250
C33 H53 O12	788791	737161	577808	1239277	744661	559158	1582551	842870	1679815	1142556	813572	651527	1817207	404119	885360	635424	878171	1134730	1306828	1475732	789839	728352	744147	487215	449984	276440	467902	912472	887733	949447	764027	636552	652651	1235694	620691	1351468	416234	752405	838694	676186	767239
Mannose 1-phosphate	529317	355142	283544	695849	443452	1320207	573428	328739	601048	404551	537715	1322019	496616	763754	1093016	495546	571497	279503	301400	401034	551361	560686	865954	491665	369294	314814	401877	298699	226418	594031	549474	276745	330284	577056	399882	618711	1614106	424499	219571	499468	494878
PE(18:1(11Z)/14:1(9Z))	1391616	1286642	731779	1387870	1402643	1670453	1454589	1236043	1344800	1264597	1218818	1820266	1276861	1740936	1475415	892753	1397132	1255471	978759	1143539	1246443	654622	1669308	1131543	810844	579713	653788	1122718	1074587	1058663	1273790	973657	678687	1527883	799431	1306309	1562495	939288	910673	1030619	1111124
Palatinose Esi+ 8.342002	721733	411172	627057	907079	544307	1113170	734225	386578	401429	678714	699237	1150133	378577	950460	1290119	939642	638208	418606	596569	465975	691207	981725	1250765	711676	731585	831551	676752	683663	307574	677602	674398	552585	604608	353421	610821	770831	1240916	1009812	199072	618123	666054
Butoctamide hydrogen succinate Esi+ 1.8960007	1424433	1406266	1391063	1289421	1437011	1390737	1336898	1484408	1220394	1232296	1369032	1411142	1288631	1481047	1382025	1421855	1223433	1371457	1213291	1290807	1339116	1303562	1329368	1471418	1376705	1469536	1529331	1245553	1365295	1402910	1334399	1385497	1388346	1314414	1367403	1391683	1352288	1324483	836696	1425006	1322104
Ceramide (d18:1/24:1(15Z))	188479	94888	63084	140891	88555	75233	101022	1608090	121110	72666	180220	64234	74307	292981	85371	841558	46303	83649	72723	244448	177364	53596	45291	49870	35641	27153	335979	68824	45901	41077	173106	43022	237968	60087	53529	76276	704666	167927	50592	171384	174568
C8 H5 S	1141950	871313	1178936	1176624	730518	1407120	1134647	888163	1349576	870686	1091282	1208084	1568417	1030289	1236082	1273987	808605	1339584	1450388	1201026	1096281	1311775	1286029	1321922	841682	816657	1068298	1497961	1164531	1304926	1099582	1042034	1235314	1050874	1130467	1133568	1186622	1378446	494553	1255597	1071492
22-Oxo-docosanoate	1144193	1088769	1027276	1214958	1072844	1025374	1177522	1460019	1254518	1130440	1114489	1044576	1094824	1061060	1073849	1204920	1052711	1080451	1119289	1292581	1069302	988960	991411	929825	944584	901336	1047259	1027386	963973	964030	1085379	976590	1056454	1085091	960292	1146525	1159396	1044334	756176	1047492	1072415
Butoctamide hydrogen succinate	1731010	1633833	1676222	1785124	1517117	1673767	1541269	1665869	1624646	1682750	1674054	1656174	1644738	1576542	1626036	1822341	1571194	1616386	1622943	1670574	1700666	1706344	1600789	1748973	1651694	1680657	1692227	1510111	1653358	1531633	1675837	1521814	1502276	1603519	1618972	1597543	1686128	1538736	1127028	1563342	1547227
PG(16:1(9Z)/20:3(5Z,8Z,11Z))	910156	604786	1324686	786826	549091	941208	695261	580347	655128	730444	887482	799352	644935	589908	802684	1406057	614629	515224	1440610	720177	882860	1782218	631402	640760	1242029	1443624	1205144	1683981	543208	767685	879452	1157595	1403816	644201	1306591	650070	767806	1314366	395561	661531	885700
PE(20:3(5Z,8Z,11Z)/14:0) Esi+ 1.6360006	1663970	1407622	1747187	1454670	1410057	1984198	1460676	1399396	1275555	1488142	1643955	1902520	1295571	2009668	1851334	1519832	1604609	1328616	1511102	1166286	1563085	1416514	1735826	1438018	1677267	1667233	1756818	1672950	1379709	1523196	1502236	1639946	1675098	1499847	1741555	1322457	2093217	1577190	1682325	1518310	1626288
N6-Methyl-2'-deoxyadenosine	840186	383763	1101034	1325977	388587	1401061	974363	481252	931258	1314219	888299	1380380	1185533	738967	1115455	802985	902669	972600	1161348	1048203	901376	1286126	1553607	757051	615580	434984	726524	1164515	664788	1060475	913929	838532	968619	755666	818671	968809	996635	1053973	104700	749991	910279
DG(14:1(9Z)/18:0/0:0)	1235810	1043063	992948	1435364	1270002	1366965	1353974	1106641	1236751	1269580	1196795	1510468	1410642	1349783	1464989	876470	1425064	1374554	1099655	1166929	1187452	828084	1586684	1251405	895225	773079	891045	1176534	1173327	1138812	1170779	1071404	868220	1134574	937453	1341002	1218014	990284	882662	1127098	1127544
D-Hamamelose Esi+ 6.5129995	1166132	830384	1249355	980049	668389	1114951	1145050	800631	879872	818893	1011487	1024078	1433952	932783	1308561	1597234	809188	1068288	1574444	827523	1025841	1308003	1056810	1034957	1093830	1065829	1236099	1507479	1100352	1240515	1086174	1256053	1299711	974576	1212108	1038486	1051832	1583284	492096	1169564	1154924
Trolamine Esi+ 6.097	757025	524917	1365820	457967	460151	514938	895020	589577	512279	476886	742805	835527	687814	572577	756497	919249	363205	787683	940387	743987	766231	1419888	506121	465835	811091	613396	864227	1501980	525443	580604	760958	701899	1415831	843946	1208587	858823	426757	550794	403277	426014	705815
C35 H21 N11 O2	1719088	1002172	1153208	1290355	976356	1167831	1250657	1036958	1291066	1093015	1464461	1090322	1113666	915278	1092369	1101466	1024528	1013865	1293592	1267585	1495652	1185363	1140238	1036317	1073594	1040583	995629	1266504	996998	1004629	1515315	1038007	1057703	1143975	1001270	1189791	1039935	1136531	746025	972090	1616149
4-Guanidinobutanal	2632825	2704174	2695208	1214148	1985824	2046174	2324216	2308683	2071148	1976144	1995955	1765429	1771335	685286	1746038	1887969	1598851	1580275	1936953	831119	1591064	919025	1330143	1253629	1427002	575312	1514411	1736603	1080668	1354087	1379638	1377681	733728	1566122	1531234	1532699	1227122	1425091	885824	1270671	1318370
Phenylamil	608932	461702	1022004	472253	428937	353464	503775	338006	723175	534594	600793	309919	717192	208245	491450	783350	284287	318160	1591703	670532	591275	952680	359489	257918	720998	412376	660587	1724497	395153	401924	591739	1115553	1050096	774638	853370	372970	236566	1191968	201231	197224	573309
PG(18:0/18:3(9Z,12Z,15Z))	1117777	857119	1357282	1158893	879662	1173763	1018860	809859	900874	1112190	1083320	987420	878697	799146	1031955	1383304	1015670	812963	1531684	956210	1080760	1641641	878341	875014	1309632	1181855	1250844	1612077	774091	954815	1073920	1335048	1367866	877058	1355066	956991	962000	1330915	589125	911587	1072826
PE(20:2(11Z,14Z)/15:0) Esi+ 2.1709998 :0	3811688	3854954	3279265	3722856	3327672	4039560	3845083	3872993	4786356	3377472	3787993	3933932	4205760	3232377	3384905	3975432	3236879	3601604	4266157	4008816	3630188	3031024	3582383	3396370	3192516	2355987	2518397	5140323	3426100	3613540	3631614	3677385	2878194	4810716	3044837	3661112	3301373	4177198	2989836	3242654	3592416
D-Fuconate	849279	1174442	754172	391977	769642	541513	719830	767739	541591	658778	800473	611634	1175581	896833	799111	948438	851681	1089488	817720	592576	776117	539772	756839	1128399	1255834	875775	894861	342247	1453950	1422167	783446	1077284	665752	654736	681842	550953	888033	1212069	1502014	1744146	922167
C20 H41 N4 O2	1705403	1761889	1516601	1910209	1654146	1593413	1794512	1669211	1908735	1811891	1670708	1576153	1737331	1504372	1591027	1534465	1661893	1675380	1628596	1899586	1640628	1497279	1560174	1532022	1514828	1396808	1508994	1504881	1591693	1555287	1627875	1502529	1538588	1783598	1493384	1826494	1611793	1552591	1194328	1563204	1606502
PE(20:3(5Z,8Z,11Z)/14:0)	2880155	2314849	3299519	2924169	2399152	3490426	2662385	2187453	2312077	2446739	2716300	3150359	2403436	3097452	3084916	2969889	2402034	1947748	2866936	2146409	2639335	2936252	2762725	2398261	2596764	2361691	2741751	3475202	1900881	2358306	2699677	2912119	2833898	2336887	2679803	2411399	2993445	2811285	1617689	2335399	2423566
DG(14:0/14:0/0:0)	1068756	1127976	727788	848238	1049796	1128326	1367241	862472	2083703	863540	993149	1160804	1714196	957166	1577727	888108	640499	1055203	1011834	1363132	1027061	1024981	1429705	1015429	836290	1011964	794044	1217989	1005229	1430813	997722	728965	1045857	1914036	1174313	1242900	858633	971950	671515	699875	1029107
C25 H51 N3 O6 S Esi+ 4.1470017	5284915	4645433	3928660	9507466	6039831	4355891	9103604	5123331	8880056	8616821	5175555	4938254	7777797	2697689	4991703	4623848	6396491	7028152	8532779	9026726	5285896	4476754	5194002	3860143	3479572	2330023	3469163	5480505	4639568	4634840	5517439	4100672	4907597	7294082	4646240	10300000	2951569	4674151	2561287	4406131	5437302
Flavonol 3-O-beta-D-glucosyl-(1-2)-beta-D-glucosyl-(1-2)-beta-D-glucoside	953906	443370	1848527	446290	333158	753292	694878	430569	268475	280021	899728	685986	376472	654403	1269806	2104294	282723	478561	1280172	367841	892520	2143127	926167	728153	1605835	1199644	1120997	1845753	346842	749020	883561	1141739	1588999	445024	1545692	622512	824652	2079191	263605	676081	877676
PE(18:0/14:1(9Z))	2972370	3568379	2163326	2274020	3241839	2695705	2853096	3298109	2947063	2222276	2766898	2791403	3150117	2941864	2940786	2322396	2090149	3003304	2893067	2910964	2627484	2129315	2935141	2821022	2564633	2300491	2076185	3067006	3020229	2731795	3504612	2596903	2305835	3079755	2219199	2612745	2617303	2947745	2679755	2489553	2547335
PE(18:1(11Z)/16:0) Esi+ 2.222	3809362	3771806	4668213	3490684	3615066	3728253	3175130	3168860	2853390	3513596	3455704	3618095	2892615	3662685	3542019	4119537	3354584	3065348	3659238	3012220	3352301	5040750	3347185	3449725	3948560	4778101	4256632	3863131	2964319	3367699	3410222	3705383	4294744	2737873	4073431	2994787	3552985	3724817	2572854	3280039	3087504
PE(20:2(11Z,14Z)/15:0) Esi+ 2.1709998	3800968	3843228	3054033	3701248	3327580	3737488	3871978	4177372	4759179	3377510	3760342	3916808	4205614	3191859	3390248	3975582	3200220	3600939	4263420	4012389	3649768	3005733	3573059	3395178	3206417	2329628	2484628	5147224	3427685	3552906	3619531	3674345	2877693	4810778	3071063	3661824	3376969	4103137	2990594	3246289	3595896
DG(16:1(9Z)/18:1(11Z)/0:0)	1736975	1347939	2159489	1751822	1465619	1664344	1757392	1397272	1558892	1746905	1707420	1549739	1560728	1337909	1583346	1800987	1619924	1404886	2065845	1618406	1630634	2265678	1448643	1484767	1820519	1887554	1979322	2175269	1397846	1533739	1620980	1864354	1999005	1429037	1956491	1501293	1383377	1861241	1029477	1496504	1576522
DG(14:1(9Z)/16:0/0:0)	1104288	1125517	1038739	1225322	1043803	1010568	1282989	854313	2445119	1249765	1053603	1064766	1509585	1057990	1003058	1087123	993214	1106986	1382584	1438281	1040896	1160682	1100968	864286	1036868	921281	812325	1740021	939570	1101106	1039856	1194895	1061679	1807498	1123334	1246642	766700	1422918	719838	931857	1063060
C29 H56 O5	1129349	1153278	1037786	881140	1018055	941486	1558509	799863	1976335	913432	1111058	1087864	1643918	814168	1159969	1266319	669387	975242	1505583	1349515	1088634	1215166	1095209	840604	1237278	1080514	1068381	2285070	976453	1311375	1088369	1026125	1379718	1857527	1489203	1348396	754814	1380248	692086	695449	1094882
Buprenorphine Esi+ 4.597	1650105	1893841	813129	1792445	1706874	1217548	2314868	2031207	3691675	1564911	1470474	1323824	3063056	985149	1774429	1429156	1172945	2125244	2205920	2971431	1518942	1074979	1471530	1167463	1048517	713694	841998	1893501	1928472	1672580	1484436	1102856	1126330	2909046	1029369	2060628	926342	1616998	1103526	1144384	1555428
C8 N2 O7 S3	1832792	1550085	1935657	2151611	1577253	2076893	1985245	1642351	2124617	1917394	1850268	1948391	1923279	1647517	1925053	1890362	1790608	1713964	2326603	1984967	1823822	2127506	1949624	1630291	1660067	1457045	1720333	2384483	1539157	1760852	1807464	1806106	1937469	1954925	1933572	1937091	1914908	1963255	1114712	1662351	1863633
Palatinose Esi+ 7.713001	5449311	2964062	8701124	3427522	2448655	4646459	4778488	3093760	2621162	2352686	5294358	4427755	3053682	3955886	6903692	9903535	2262521	3230761	6945528	3117888	5212741	10200000	5375787	4181558	7781192	7704656	7907804	9214487	2403553	4600990	5200935	6169178	8101493	3552953	7812775	4325424	4872987	10100000	1887446	4063218	5151190
p-Nitrophenyl-O-ethyl ethylphosphonate	2136520	1521428	2145964	2157828	1369533	2376838	2063733	1575560	2349290	1742193	2071662	2146482	2567401	1918709	2167902	2218611	1445978	2323864	2386587	2163207	2055422	2234900	2233429	2331827	1705806	1470609	1989304	2447506	2153059	2266985	2035572	1941261	2154285	1992398	2051231	2109366	2105969	2373649	939523	2188849	2007793
Trolamine	1160216	767057	2075662	659984	692329	664577	1429924	881415	753670	682549	1177236	1264553	985687	924170	1139167	1439291	560469	1197794	1410237	1183148	1131313	2351675	694497	656521	1305807	983030	1375161	2420919	773124	807838	1102889	1065036	2489218	1305989	1966702	1387227	634995	838111	606544	636680	1102981
Galactomannan Esi+ 8.458005	745292	389246	1107802	2050096	1311430	2492185	1823104	422367	283290	1528141	732227	2548687	1428439	2173104	3073118	1706180	1437904	771471	2230515	1281161	778658	1169220	2825359	810134	1095068	832600	1056662	2433011	1209596	865813	632625	2123247	1295888	471156	1230428	1888085	2719416	2030448	349528	729932	629222
PE(18:1(11Z)/16:0)	1734872	1410063	2554873	1490783	1335412	1949369	1387465	1379018	1160765	1466302	1744746	1624483	1327113	1664780	1579907	2313070	1525810	1196557	1849779	1223151	1792164	2825593	1467356	1633968	2459868	2932248	2676276	2055748	1223136	1704471	1586752	2198789	2611664	1126303	2426123	1296000	1782322	2119544	1506438	1564987	1605584
PE(18:2(9Z,12Z)/16:0)	2092516	2427051	1839165	1863877	2287508	2487348	2048800	2180059	1910238	1982831	2117232	2537494	2038592	2798415	2267215	1535683	2422681	2351007	1486464	1851539	2180872	1466495	2386493	2652268	1697877	1937125	1864881	1565745	2114780	2155924	2075890	1885077	1549667	1982855	1794726	1912181	2548650	1590796	2835815	2420201	1871037
> limit Esi+ 7.0070014	1731265	2055488	1595033	1721570	2095367	1565746	1557181	1796281	1554831	1699720	1757957	1608591	1529249	1643431	1593321	1651573	1939877	1614826	1498494	1610251	1725606	1589392	1582219	1677112	1778321	2157116	1637601	1707667	1672409	1606859	1749919	1706824	1603869	1657605	1614153	1800589	1543280	1529991	1640488	1552569	1673465
D-Hamamelose	1707423	1403264	2181278	1419656	1211391	1513787	1627391	1326898	1485666	1357527	1824869	1438815	2100856	1384483	1886772	2400689	1269279	1601500	2512923	1517792	1763886	2020684	1692398	1625823	2020088	1669023	1941921	2269695	1751853	1955640	1681578	2146254	1987107	1673351	2091229	1575167	1683424	2601195	1003724	1905626	1782240
C3 H3 N4 O	1490663	981784	1561517	1614604	878216	1945868	1400260	1152201	1251671	1362553	1435107	1748026	1552014	1501945	1481047	1641367	1360703	1422500	1717258	1313110	1404756	1354391	1659579	1627374	1450936	1188653	1342997	1619445	1242635	1754773	1381997	1417518	1388059	1062581	1393373	1248270	1690980	1622841	579170	1610608	1363337
PE(18:1(11Z)/15:0)	2025174	2535534	1029724	1134543	1750478	1688253	1597023	2466674	2647995	1031798	1941124	1722543	2886312	1855344	1990682	2018575	1020222	2377938	1855568	2074476	1898809	1064374	1742208	1935509	1860711	1194767	1048187	2686663	2627544	2279700	1942050	1893009	1272317	3034655	1458279	1508250	1684912	2163313	2431312	1712387	1940729
PG(16:0/16:1(9Z))	2586083	2813043	2342168	2327729	2476429	2694735	2280951	2283179	2240018	2626701	2524912	2535795	2291136	2320548	2344607	2339211	2559881	2431606	2548959	2241503	2498897	2524640	2375636	2583633	2347853	2392097	2308675	2184544	2514248	2446004	2414584	2377225	2496745	2444770	2292794	2285638	2204533	2151829	2011683	2295428	2534146
PE(18:1(11Z)/18:3(9Z,12Z,15Z))	2287571	1545450	3755309	1673011	1258359	2153795	1506137	1357554	1405288	1642968	2001313	1804067	1468277	1750549	1853945	3709815	1402673	1158721	3274956	1476430	2096174	4666099	1529596	1608116	3220737	3835227	3597110	3687808	1323719	1918393	2132147	2937336	3865481	1368045	3376965	1250081	1994841	3155120	854116	1662422	2023142
<none>	2910831	2950251	2751346	2789150	3039770	2625312	2622838	2896849	2607308	2749277	2737962	2707329	2575447	2903763	2615113	2506911	2719634	2635771	2281582	2554912	2685001	2457215	2605088	2778797	2747983	2887521	2676871	2133617	2787204	2535237	2600047	2558150	2437170	2491723	2435803	2350074	2549756	2536970	2820582	2656820	2604255
4-(beta-Acetylaminoethyl)imidazole	782605	264305	175517	2186635	1116473	292836	1307359	252565	1673752	2824990	749104	286399	1501247	191147	1154777	174457	1824636	1722047	1256645	1325436	732735	1176330	660669	154342	420139	380350	187622	381761	1063049	91708	728881	500183	412651	599638	378773	1272155	338326	546466	141797	136635	743411
C24 H23 N8 O13 S	1295621	1026881	1438095	1363300	943059	1455525	1359673	1163463	1567315	1153901	1317908	1366930	1458665	1121949	1402248	1536283	1079602	1073096	1926385	1424469	1328643	1442602	1400094	1110520	1221810	825182	1227906	2186844	1053583	1319728	1312722	1425064	1548517	1486044	1604610	1237014	1345205	1610829	751241	1158482	1326823
Equilin sulfate	844971	1518733	394164	252624	1207144	393526	635995	1117496	2147518	178450	813563	218361	1021329	419029	967815	327028	180134	212230	692348	1243609	815458	437751	473604	30910	303210	323522	292930	985051	696567	22527	802929	536692	547532	2478648	585010	466259	344890	427223	1516811	5201	805194
PG(16:1(9Z)/18:1(9Z))	1865311	1488892	2212608	1857639	1554387	1780412	1810028	1488982	1672870	1854400	1821777	1652885	1658354	1437637	1673573	2003612	1737990	1504453	2278312	1734531	1816657	2467219	1568005	1609143	1993712	2051989	2166743	2364627	1465978	1661108	1801541	1966104	2159539	1522051	2142292	1639923	1503517	2059040	1182266	1673562	1802638
C6 H2 O4 S3	2311167	1943811	2370322	2601414	1957442	2527488	2409181	2036665	2565609	2322680	2273149	2396298	2350666	2031025	2337839	2322187	2189080	2092504	2780186	2395175	2231855	2595424	2339561	1985460	2052652	1823422	2133859	2830483	1884774	2142855	2201171	2193868	2341227	2347451	2356315	2313334	2308439	2385048	1419151	2018009	2236616
Xanthurenic acid	1318219	2146708	744384	633173	1915878	845618	1107332	1811381	2070156	581487	1335091	588258	1395832	986669	1540006	714211	657540	645689	896832	1699689	1360739	781008	1008033	235982	737388	851458	689158	1075453	1334903	165372	1354734	940032	896012	2520291	979183	1013555	860818	777807	2202458	71267	1343038
C7 H15 N O3	2003418	920237	2941771	2163222	1666159	2554783	1503218	793127	1670071	2031474	1968256	2380872	2441239	2259924	2818225	2153894	1756065	2216756	2277420	1356896	1969413	3285906	2547602	1366137	1372272	2640799	3263359	1524727	1783928	2312402	1988311	2208404	2995559	647834	3184516	1657752	2433003	1736341	721604	1851694	1984224
C14 H14 N2 O17 S	8879455	9007177	8385186	8668615	9186943	7991446	8292959	9214383	8015065	8742104	8760839	8204810	1295604	8532531	8234737	1614272	8570173	8083906	1277314	1583320	8746550	8108557	8092501	1553701	8954634	9284755	8560616	1253858	8526877	8185888	8686367	8668720	8139923	8529024	8294640	8780692	8037049	1612095	7409273	8087049	8545069
C21 H35 N O8	2341976	2323337	2249250	2472565	2286306	2220710	2322712	2370894	2366403	2294326	2229953	2245572	2281966	2116468	2176368	2278111	2117806	2135621	2248301	2352731	2187104	2149836	2175935	2144026	2141352	2138531	2164299	2169182	2164966	2139129	2234915	2073024	2151226	2261204	2119679	2348071	2083069	2126213	1453253	2115986	2192462
DU 122290	1067948	1440920	957510	452302	910221	678235	928362	952123	675065	787752	1035741	750790	1736977	1156517	1060629	1353570	1019974	1473456	1123127	730856	974743	690726	954258	1476555	1721388	1124267	1214686	375741	2005688	2120312	1001991	1519731	882313	813399	889804	682897	1178464	1797992	1899279	2633934	1204434
Sulfadoxine	728043	722869	1426124	600596	783235	621350	1082896	642254	2385782	534711	902080	450570	2796201	417380	1458454	624739	343673	608442	1840379	1811876	968387	1175482	859596	249099	568857	374456	540480	2790431	1356027	258353	978482	1675002	1847427	2611509	1060739	1006002	662746	1169462	680786	66724	987732
FAPy-adenine	3317936	1568370	2199335	2347511	1646495	2539456	3413882	1863096	2919497	3266849	2258580	2166944	3346411	2153996	2582601	4148917	2120889	3596729	3987466	3944703	3401149	3677838	4160965	3466989	1820471	1450957	2289567	2743611	3734224	3531238	2462823	3189678	2854289	2233705	1806478	3026622	2253823	4063276	941723	2949121	3429763
butoconazole Esi+ 7.0109997	9599850	9714538	9092965	9352054	9807200	8702366	8835429	9775638	8619059	9362996	9411618	8838938	8447253	9198383	8797136	8965159	9058167	8747186	8269954	8743209	9282380	8718973	8633510	9129546	9473168	9892279	9109929	1509706	9116471	8713822	9214732	9253096	8712562	9038095	8838158	9370451	8615389	8452802	7932481	8725027	9225571
> limit Esi+ 2.0889995	2996880	2104435	5307740	3985837	2242589	3022488	2870010	2121968	2631829	3855443	3506180	2575470	2501865	2129553	2857134	3895703	3267990	1924598	4312968	2636796	2973188	5442822	2399155	2317157	3133945	3239409	3870384	5168832	2031569	2556478	3299027	3558994	4860251	2360064	3950649	3240232	2606252	4376302	1352226	2829135	2650831
Eupacunin	2559424	2454136	2400985	2694944	2509105	2476871	2643167	2338078	2762542	2574288	2487489	2485274	2675921	2337543	2480192	2274315	2429097	2547189	2545693	2706565	2511436	2315039	2482596	2362813	2355387	2266299	2275005	2407843	2418740	2385336	2477414	2367390	2354179	2590789	2305639	2632384	2270181	2297966	1719061	2322644	2457360
> limit Esi+ 7.0099993	2298020	2751000	2140347	2271997	2814195	2076628	2080139	2372170	2061364	2656939	2296006	2129298	2044416	2177429	2089394	2183889	2161871	2095610	1999097	2109656	2272469	2104496	2113429	2260462	2757778	2869403	2157845	2255083	2204085	2130457	2306864	2272009	2105551	2222500	2139525	2353807	2054196	2010671	2215021	2050155	2207284
PE(20:1(11Z)/15:0) Esi+ 2.169999	3683411	3216455	3753951	3425998	3158493	3927680	3325121	3213558	3937946	3106185	3589522	3890446	4207112	3506060	3677426	4097025	3075744	3542188	4724153	3558904	3565204	3665477	3840556	3331942	3550574	2925233	3225560	5531940	3357959	3437902	3522344	4164191	3604717	3855036	3618763	3527666	3393741	4288351	2270072	3227712	3332879
> limit Esi+ 2.1309996	3514731	2845051	4330580	3474937	2677275	3200815	3347941	2825758	3784635	3481166	3307033	2964802	2883232	2399703	2921552	4361902	3034094	2179735	5059574	3296940	3333993	4773570	2644865	2461925	3587209	3172915	3558910	5897533	2363857	2779332	3207317	3790498	4128466	3503475	4012261	3537426	2815717	4468320	1875401	2600063	3377098
Hypoxanthine	2472495	1371273	2967666	2669362	1513338	2655683	2170526	1711107	1939024	1962478	2465795	2304088	2714995	2091236	2600313	2934569	1664039	2240798	3123452	1961306	2387874	3174769	2653149	2288496	1943449	1903389	2227399	3635562	2202019	2307857	2374511	2401865	2649506	2348224	2537908	2688172	2268280	2697214	869769	2186319	2439617
Glycerylphosphorylethanolamine	1107838	1173747	564315	1768086	1140986	759845	2157806	1374789	2404277	1408551	1053045	1040065	1237574	466469	1048028	565496	1172598	1177304	988090	2705988	1043263	699059	1059259	553117	535443	388718	521139	672897	656049	703079	1025120	427791	660172	1987269	654199	1943348	567941	551626	635782	619102	1012862
C14 H39 N16 O4	1943210	1791049	2034521	2561934	2172942	1753248	2439812	1873910	2845059	2245437	1842078	1929628	2481747	1404874	2219586	1947293	1903754	2174449	2984891	2831657	1856369	2177884	2082111	1484588	1620986	1409781	1844466	2195158	1778103	1790852	1800435	1709530	2198851	2213048	1993505	2604624	1389555	1983146	2243105	1563192	1819434
PE(22:1(13Z)/15:0) Esi+ 2.1129992	4483625	3265489	6387939	5160108	3396636	4573846	3580136	2890915	3685761	4617712	4356715	4296810	3961693	3808465	4116215	4940750	4040909	3413522	6355532	3289676	4457303	6645613	3626072	3738253	4786517	5055467	5804069	6051534	2925901	3967841	4268202	5310197	6308820	3075310	5341545	3954415	3550682	5441009	1734707	3743651	4094199
LysoPE(0:0/18:2(9Z,12Z)) Esi+ 4.097	2839310	2417417	3079892	3306728	2422798	2412368	4153162	2691405	4171544	3472056	2972876	2596797	3471157	1558526	2639235	2848383	2305982	2676535	5052748	3873106	2780872	3790001	2343605	2047671	2466379	2113680	3187961	4014338	1902002	2471950	2707302	2235319	4472687	3072825	3786280	3526832	1870033	2847026	1214654	2450822	2635856
2-Oxoarginine Esi+ 8.704997	9387592	9446015	9056319	12500000	8392139	9942293	13600000	11100000	15000000	8743975	9915073	9935406	12900000	8024478	10600000	12900000	7187629	11400000	14700000	15200000	10300000	11800000	12200000	9820209	9612275	6970608	8549953	15100000	9275378	10900000	10500000	10400000	10400000	13300000	10300000	13000000	9893008	12300000	4995542	10900000	10400000
Phosphoric acid	3532062	3091989	3690696	3930930	3072349	3837320	3659539	3170101	3815462	3523957	3493192	3614315	3569292	3217417	3559179	3539965	3360347	3235614	4050827	3596920	3415685	3857686	3547372	3147711	3201291	2869742	3285178	4113497	2949726	3292038	3345076	3352232	3548522	3504212	3555485	3509500	3490098	3569863	2304874	3138779	3396984
C9 H2 N2 O S Esi+ 7.3940005	173120	13300000	168905	158716	13300000	124475	151840	13100000	12100000	187712	12800000	144992	144450	12400000	147124	133979	163560	227813	75751	12100000	170507	12000000	167631	247791	158625	271162	207561	12100000	257041	180669	158466	145082	115933	12300000	126197	177497	143716	126765	11400000	196905	157760
2,2,4-Trimethyl-3-(4-fluorophenyl)-2H-1-benzopyran-7-ol acetate	1602794	765900	2551042	3066291	1118982	1764585	2612292	997612	1436766	3251874	1837836	1899847	1217817	874220	1767289	2130292	2422757	840066	3452517	2007515	1890484	2778538	1500323	1123699	2006314	971966	1529434	4039824	511865	1887272	1893220	2232298	2263834	1533117	2138402	2699427	1825177	2720118	340650	962977	1892330
PE(18:1(11Z)/18:2(9Z,12Z))	7500910	5390659	9538817	6108107	4251987	7569317	4715331	4802053	4229721	6512376	6963781	6782765	4669021	6865998	5023178	8766634	4684291	4290021	7928178	4518808	7034781	9323970	5684149	5493230	9235239	7086047	9236451	7545086	4491482	5461017	6646480	6698856	8894151	4303119	8365981	3938978	7002111	8083709	3240746	5463623	6293267
C25 H51 N3 O6 S Esi+ 1.6689994	2565898	2417277	1865201	4162160	2631754	1882004	4655618	2838353	4415074	3595904	2554923	2562629	3553040	1325635	2375213	1983189	2929007	3379669	3711585	4530948	2535083	2182491	2401361	1952654	1766899	1293052	1848481	2300140	2083856	2169164	2487632	1819563	2552016	3406131	2296322	4312312	1429019	2102284	2028991	2178092	2465989
Galactomannan	1699504	1512099	1167011	2626337	1727864	3160104	2327444	888338	1366146	1983506	1589661	3228823	1793720	2785703	3817231	1609458	1890889	771610	2707986	1692368	1690581	2057545	3554477	1762293	1529253	1862864	1261750	2968073	1535257	1394232	1648639	2580556	909013	804824	978444	2417445	3422877	1575591	412381	1367985	1632645
C29 H38 N11 O6	4255859	4393761	4535206	4408176	4341495	4359826	4289533	4005630	4351946	4341897	4199357	4395524	4428125	4349914	4289886	4300070	4301162	4312829	4330421	4219525	4155631	4253110	4345216	4377622	4439568	4328354	4281811	4432444	4329375	4373727	4133471	4456573	4329130	4285094	4308906	4386733	4159842	4246427	3095153	4164757	4097137
Perseitol	2522793	1579887	3117133	2079329	230031	3034938	2197701	1331157	1227451	220412	2511735	3278861	1563153	2231293	3439042	4333274	1127377	2023777	3019787	1342610	2494336	3679499	3810861	2852675	2899888	1878428	2636835	4575611	1827439	2647192	2485290	2717712	2711484	2127555	2515632	2401962	3910316	3910515	885520	2488655	2424824
C23 H12 N5 O20	3227111	3891613	3000542	3728284	3966499	2907994	2998380	4009782	2868948	3778621	3788679	2986688	2828659	3705904	2938306	3080019	3660851	2924327	2829382	2967063	3203991	2928826	2948520	3131930	3915395	4074167	3037277	3193865	3123271	2978021	3226266	3164514	2948406	3024683	2990265	3292076	2869996	2814557	3110765	2893900	3082266
PE(22:2(13Z,16Z)/15:0) Esi+ 2.1259997	6186076	4710521	7112983	6998486	4814171	6139331	5923384	4591594	5448987	5621403	5573967	6081805	6130039	4963936	5310039	6965578	6035054	5125810	7729966	5295392	5814023	7534349	5748186	5141605	5668553	5150907	6352769	8395107	4495221	5253541	5576778	6544545	6645459	5239741	6713142	6876998	5423594	6796788	2923084	5168344	5587509
LysoPE(0:0/16:1(9Z)) Esi+ 4.235998	3470046	3365249	1667915	3942588	3368355	3060732	5541029	4002061	6040284	3308854	3387127	4022993	4839798	2297514	3658824	1865966	3222074	4382601	3530587	4887619	3190303	1872156	3946597	2597579	1998198	1137570	1690848	3118670	2944270	2788538	3170890	1932981	2596287	5007866	2564939	4129718	2464381	2329036	1921562	2979770	3114687
C25 H51 N3 O6 S Esi+ 3.774001	3394765	2836953	2539711	5726313	2304342	2374099	6725751	3567190	6639381	3878658	3363273	3620621	4586504	1324716	3102794	2460599	3433119	3512911	5950140	6363962	3126852	3391883	3122026	2077609	2289271	1457261	2572372	4070256	1814827	2391536	2768118	1898916	3831925	5059970	3559408	5267440	1739523	2961753	1090217	2445597	3152389
PE(22:1(13Z)/15:0)	6328107	4964158	9664655	6776219	5002233	6352921	5476559	4764406	4814590	6427815	6163071	5677961	5157167	5519343	5685451	8005482	5789209	4622366	7997396	5113124	5992792	10100000	5578663	5443907	7297635	8077829	8749821	8273941	4765033	5584435	6055145	7305110	8918430	4377274	8192578	5860103	5850408	7490084	3505406	5525218	6044443
PE(18:1(9Z)/16:1(9Z))	8870336	7059028	7270507	7156418	7078938	7536995	6917295	6822780	6296200	6587284	8429467	10600000	6658959	8035777	7192052	6222640	6899668	7060527	6032843	5952587	8112465	5917515	9731540	6939630	6708018	4884737	6675280	6190935	6515080	6568924	8080546	7258391	6407619	6455776	4791134	6212705	7257761	6342528	5252794	6369839	7722826
C17 H35 N20 Esi+ 1.6780005	2700472	2737653	2853913	4133301	2653791	1921407	4297040	2774221	4256973	3963303	2637239	2166731	2617777	1318891	2329426	2699201	2711304	2172986	4397346	4428174	2553750	3689460	2062771	1580629	2255951	2013550	2751861	2841177	1781272	2100090	2612025	2057222	3684408	3175319	3134260	4079047	1437061	2581096	2672916	1837668	2588253
C30 H35 N5	1427827	1523619	774775	2454102	1950587	1473797	2476282	1712384	3078512	2070754	1384980	1474991	2616274	1031419	1919260	971330	1825457	2068294	1787077	2656263	1357442	963818	1916636	1165867	735379	467926	702990	1299484	1717976	1565028	1331546	823077	941931	2189714	883575	2424308	1068595	1101210	4196	1224182	1337874
L-Glutamate	3394950	2306869	3811869	5310446	2686205	3730856	4446629	3049018	2848598	4592445	3281796	4037413	1588281	2262355	2713923	4262796	4849856	1547747	4671797	3321798	3240915	4041911	2287076	2317333	3370704	2044578	2695598	5396259	772563	3220841	3156001	3574919	3172508	2925251	3720034	4411164	3687765	3639457	1517419	2515640	3155276
C22 H43 N O	2936996	2310596	1787745	2755827	2165170	1887284	2563586	11400000	2812049	2127253	2858363	1856846	2189848	3523922	2186933	6734394	1703761	2227327	2039716	3901104	2822961	1660035	1637077	1636391	1344420	1130064	3819446	1689778	1617257	1503471	2769216	1448861	3196740	1964064	1615224	2301612	6095409	2597878	1490167	3075290	2835530
2-Hydroxy-6-oxonona-2,4-diene-1,9-dioate	3039013	2293362	3488642	2379047	1718524	2483242	2921114	2268846	2673818	2161639	3078930	2417451	4128396	2257486	3281812	5210818	1923444	2854748	5577180	2631302	3081920	3719188	2814045	2961811	3616308	2744612	3347810	4885829	3183154	3820877	3035591	4377750	3576625	3054124	3513834	3053178	2606677	5300175	876019	3290436	2970978
Buprenorphine	1763067	2113190	1258246	2611767	2153969	1754529	2691175	2251167	3790312	2382627	1693334	1620650	3336838	1180549	2196083	1804278	1824153	2458641	2870905	3378469	1663564	1622367	1900283	1495601	1335579	923629	1189204	2194855	2283178	2159346	1585619	1364428	1536412	2779856	1461672	2537420	1194330	1911645	2369	1529788	1634549
LysoPE(0:0/16:0) Esi+ 4.5299993	3514168	4687770	2004822	6167756	6131640	4557189	4576132	3603131	4965942	4574648	4456465	4294876	5023064	3826036	5802066	2222517	4934296	3793706	3114122	4510088	3528549	2317930	5517497	3745677	2409815	1870292	1720079	2646323	5085690	4743866	3217236	2685803	2042510	4157506	2020050	5279290	3614886	3178407	3236770	3035855	3379943
C32 H52 N15 O	5517240	5510479	5332264	5477047	5225799	5351435	5563783	5169065	5795321	5432914	5464014	5396919	5108118	5066056	5033091	5890570	5478761	5105568	5401084	5605300	5438198	5616572	5121518	4860564	5171818	4976737	5016429	5445880	5121951	5231449	5304551	5106171	5066949	5707351	5294613	5700469	4843086	5137587	3499087	4714941	5361952
C28 H47 O7	6232669	5241230	6712164	8588895	6217837	5631741	5307091	5299125	6727208	7089903	6014664	5774032	8115579	3967814	6885873	6563009	5893449	6340085	10800000	6098255	6095087	7569659	6718662	4280186	4858069	3877819	5707386	8123109	5065261	5376009	5823077	5431182	7058198	5139752	6593320	8658920	4289288	6783830	2875758	4677759	6012675
C18 H16 N2 O19 S	5561420	5688692	4289802	4545227	5702653	4142409	5104347	5779591	4115566	5483308	5518110	4266001	3976963	4325582	4164944	4363708	5303023	4260164	4007566	4173237	5475077	4171402	4185149	4457137	5629529	5855154	4304324	4456233	4434067	4227773	4606033	5416763	4278629	5310410	5171768	4658646	4972369	4001175	4547258	4071596	4457709
C25 H51 N3 O6 S	5247221	4688391	3915074	9514836	6027424	4362623	9143205	5147362	8906903	8422875	5136729	4941058	7826439	2702736	5027527	4618884	6417090	7127772	8717555	9054293	5305282	4744165	5205205	3864812	3527855	2278956	3471799	5499490	4614512	4652887	5520683	4102148	4868750	7307987	4588157	10300000	2971925	4708409	2561420	4308304	5493771
Dubinidine	2183003	2244540	1396487	3912818	1898409	1385099	4149113	2684564	5100443	2830342	2276239	2056547	2099703	929566	1601096	1106821	2120728	1837407	2313518	6988504	2332924	1731329	1504479	1067467	1317399	863750	1294737	1472039	896499	1519128	2290606	1131066	1929709	4513987	1944720	4432066	1230309	1117413	1134028	1482758	2342250
C15 H33 N20	5600521	5934580	2828596	8029381	4610784	3543948	11100000	7408860	14500000	6186187	5592343	5150867	8400170	2069951	4704886	3823870	4695915	6576147	9331790	11400000	5299588	4077386	4712865	3289943	3550346	1877841	3022987	5948513	3473196	3971662	4961085	3391292	4996303	10700000	4721901	8614479	2478296	4473447	2778528	4038322	5203274
2-Oxo-4-methylthiobutanoic acid	3867374	5194129	2394186	1932169	4399604	2383845	3370952	4310835	8292665	1404724	3717231	1723733	4059523	2160357	4103566	2216712	1439723	1253652	4046312	5106033	3644054	2687156	2317402	429876	1851977	1645956	1742530	5486358	2593707	403519	3595400	2915187	2895190	8743429	3140468	2650839	2142176	2496711	4588486	153278	3544210
C17 H35 N20	6004849	5625579	6649840	9575090	6124555	4501632	9257661	5814958	9458170	9509527	5932549	4846169	6130558	2939167	5567086	6591631	6443510	4783706	10600000	9392203	6035130	9158798	4874725	3523146	4906599	3915408	5956542	7476150	4255235	4846962	5782659	4928147	7778833	7106984	7008275	9487540	3361543	6488001	3871611	4111037	6190257
PE(20:1(11Z)/15:0)	7592508	7275709	7216040	6767680	7036965	7798157	6297454	7074401	7438568	5934970	7464273	8117723	8279984	8067055	7667390	7828327	6224026	7741967	8447806	6840118	7499059	6623918	7829258	7684046	7758372	6513452	6854540	9342813	7568643	7307166	7360419	8621507	6969569	7342679	7411995	6890499	7841166	8489932	6408556	7209640	7363706
> limit Esi+ 1.6329997	4738340	3519471	8511098	5030153	3099787	4276850	3939289	3260840	3373680	5001537	4518886	3530445	2711146	3197980	3639784	7235576	3749048	2129671	6732371	3701813	4335767	10300000	3077239	3071917	6001759	7200558	7699212	7138776	2484637	3775305	4476248	5232393	8003745	2990397	7099205	4234447	3684116	6019574	2171064	3506593	4504748
Dihydrozeatin Esi+ 6.5299997	16600000	6887360	27400000	20600000	12100000	22500000	19000000	8472978	12600000	15700000	16500000	20300000	13200000	16400000	22500000	14600000	16300000	14000000	12500000	12100000	16300000	23500000	21000000	10800000	11200000	19300000	22000000	20300000	11000000	10500000	16100000	7199135	24200000	13200000	24600000	14300000	20900000	12400000	6802891	7370874	16100000
Taurine	5195667	5329289	5054138	3728582	4626828	3433207	3907735	4866383	6537833	3337261	5009798	3048406	3779684	2634279	3579901	6148483	2937998	2803604	7210669	5672303	5021940	5458326	2901081	2809061	5220475	4214315	4906325	7707463	3303291	3034851	4966116	6487933	5823159	7157891	6149813	3316857	2786121	5911764	4583486	2532262	4875181
Deoxyadenosine	4229233	2015258	6179156	5036247	1873591	5552708	4585587	2443812	3761481	4556342	4459103	4939919	6724817	3333264	5340229	5923897	3431026	4461052	8573838	4184988	4544290	6995891	5595124	4275528	5031604	3215242	4641038	9297024	3958311	6037621	4603829	5569161	6196869	3469116	5255614	4227835	4725866	7259230	785254	3946731	4614321
C12 H6 N4 O7 S	9083480	9229978	8689309	8871627	9186187	8357217	8455319	9284277	8297448	8831074	8965741	8470719	8059242	8738991	8414743	8659146	8573382	8399420	7954381	8331793	8857263	8324568	8247754	8733130	8977266	9290990	8664601	8516870	8667886	8353950	8797694	8755479	8309703	8594532	8390471	8883340	8183141	8102153	7356416	8167735	8548198
LysoPE(0:0/16:1(9Z)) Esi+ 4.6020007	6247069	6089319	2796227	9482623	9388257	6907781	8511844	6339899	9952332	8605200	6073101	7011976	9247419	6111982	8256180	3347666	8696179	8048984	5228752	8317069	6093652	2803106	8926256	4879123	2726086	1723899	2415441	4257825	7041585	5588784	5916891	3356692	2937070	8188104	3009279	8633270	5648895	3853935	4731390	5024902	6153747
C15 H10 N6 O13 S	8873250	8995641	8377817	8681477	9184397	8008723	8276557	9205805	7997808	8739302	8756502	8196691	6427061	8552879	6615920	6847513	8560151	8087608	6410134	6627058	8741531	6549988	8083111	8559692	8951201	9273796	8548765	6877463	8549588	8168918	8674033	8675035	8133007	8533758	8296247	8793509	8030585	6306099	7403125	8077981	8567334
> limit Esi+ 1.6339997	6291742	4864249	9397889	7770739	5044907	6110431	5987616	4773527	4940073	7615551	6098840	5313376	4624073	5010432	5234945	7828913	6745232	4392845	8220357	5193350	6006699	9391768	5060205	5198318	7243049	7289805	8375218	8236308	4349095	5677603	6097075	7277757	8406875	4563161	7867516	6471975	5425120	7466837	3297654	5633100	6079269
butoconazole	9599850	9714538	9092965	9352054	9807200	8702366	8835429	9775638	8607254	9362996	9411618	8838938	8447253	9198383	8797136	8965159	9058167	8747186	8269954	8743209	9282380	8718973	8633510	9129546	9473168	9892279	9109929	7396038	9116471	8713822	9214732	9253096	8712562	9038095	8838158	9370451	8615389	8452802	7932481	8725027	9225571
Adenosine 2'-phosphate	5302888	4224646	5880209	5904118	3818302	5883015	5437933	4268891	6723171	5053518	5477284	6185525	5985638	4630951	5053694	6050747	4737637	4340019	8147701	5303011	5497740	6588376	4752677	4438774	5783257	4423297	5769101	9364936	3780785	5487362	5489227	6155494	6834109	5619502	6861418	5532396	5571066	6113782	3181396	5018200	5462721
Inosine	4473575	2450455	5597029	4863210	2694641	4985505	4040337	3084168	3524212	3511291	4525767	4333346	5045822	3869348	4887928	5560532	3066150	4190991	6080005	3639665	4421772	6067404	4987702	4241461	3558406	3492097	4183428	6888611	4104748	4297078	4363339	4492934	5026879	4359714	4802131	4899196	4275718	5149156	1577903	4129716	4465701
C49 H86	1802072	1272939	885946	1554371	1159240	938840	1343185	10200000	1471678	1045033	1755415	915705	1081590	2329383	1144210	5357120	807398	1149990	1018544	2358093	1700773	799583	730039	784754	591500	469422	2656659	829475	752374	654753	1697825	677303	2049553	935422	764127	1174736	4714437	1539238	736450	1934643	1695350
LysoPE(0:0/18:2(9Z,12Z))	7628765	7095792	7398543	10100000	8133567	8228022	8257405	7023620	9498210	9881958	7380525	6481026	8879381	5334131	8130939	7784216	8305228	6854391	10800000	9108107	7435050	9421609	7190311	5759748	6262483	5288127	6751163	8746136	7317613	7363038	7130016	6784003	7456777	7506647	7078000	8177072	5921053	8317926	5078111	5914279	7540627
Palatinose	5363774	3024302	8554526	3347212	2410503	4572676	4675764	3044386	2558250	2293612	5201413	4360808	3016113	3892449	6786959	9719208	2215856	3191087	7076129	3074879	5122664	10000000	5285972	4270926	7659075	7592943	7773772	8999596	2379655	4698867	5105991	6269088	7944878	3488576	7678798	4233195	4787528	9891539	1859761	4179999	5053918
PE(20:2(11Z,14Z)/15:0)	9642009	10000000	6882274	8377972	9015596	9365269	8984847	9573505	11100000	7725137	9271151	10100000	10500000	9347283	8890627	9617376	7961315	9880139	9523502	9797369	9100047	6632334	9310274	8944797	8359567	5988146	6277759	11900000	9426458	8970607	9209323	9553542	6728532	12300000	7549966	8684761	8954459	9741584	9749533	8750148	9169373
D-Proline	7322264	6366184	7232690	8718760	6406493	6755051	7026901	6384639	7826610	8067024	7226536	7555736	7824107	6788195	6461756	8445570	6833223	7098211	9651129	7273671	7081719	7771586	7410399	7137414	6993302	5511468	6638149	8490715	6368160	8706487	6979767	8228938	6404468	5995881	6486468	8848105	7180487	9942351	3556326	9070386	7002194
> limit	9840172	9020234	11700000	9932393	8502756	9221819	9291654	8574530	9894095	9571780	9667237	8711773	8243562	7897633	8503506	12800000	8453002	6997765	12700000	9260870	9588346	12400000	7902701	7941489	10900000	9638882	10800000	14300000	7415830	8654595	9574388	11000000	11400000	9692595	11300000	9208791	8652158	12000000	7228955	8406970	9470608
PE(22:2(13Z,16Z)/15:0)	12000000	10200000	14300000	13300000	11100000	12800000	11400000	10400000	10700000	12300000	11900000	12500000	11400000	11900000	11800000	13200000	12600000	11300000	13900000	10700000	11800000	14000000	12000000	11700000	12300000	11800000	13200000	14700000	10900000	11400000	11600000	13200000	12900000	10500000	12900000	12400000	12200000	13200000	8126880	11900000	11800000
C9 H2 N2 O S	13000000	13300000	12500000	12600000	13300000	12100000	12100000	13100000	12100000	12600000	12600000	12100000	11800000	12400000	12100000	12300000	12400000	12000000	11500000	12100000	12600000	12000000	11900000	12300000	12600000	12900000	12300000	12100000	12300000	11900000	12300000	12300000	11900000	12300000	12000000	12400000	11800000	11700000	11400000	11900000	12200000
Tiamulin Esi+ 1.697999	4714324	5779378	2835689	6568340	5731406	3651134	8106149	6294711	10800000	5930455	4580520	4768055	7305524	2899049	4765467	3808102	4816407	6482579	6717923	9100804	4516942	3335836	4785552	3593651	3322682	2058116	2826543	4712970	4587251	4167226	4487381	3400364	3818734	7888531	3573845	7069195	2782658	4183003	7687217	3962232	4442445
2-Oxoarginine	9358868	9387316	9057479	12200000	8058028	9750354	13900000	11100000	15000000	8551330	9905971	9878391	11600000	7764871	10600000	12900000	7517163	10700000	14700000	15200000	10200000	11800000	11900000	10200000	9605234	6962581	8561277	15300000	10500000	11100000	10500000	10400000	10600000	13300000	10300000	13100000	9657406	12200000	5017847	10700000	10400000
Tiamulin	8258679	8743357	4954420	11000000	10100000	6469665	12400000	9064406	16800000	10400000	7998861	7783197	12300000	4894268	8217899	6769002	8491482	10600000	11300000	14500000	8197856	5869669	8539583	5770898	4958293	3179871	4422017	8556116	8091736	6947752	7992252	5906665	5785040	12600000	5602079	11900000	4924976	7586900	5669630	6311856	8237674
Asulam	17600000	17800000	16900000	17200000	17800000	16200000	16300000	17700000	16000000	17000000	17300000	16400000	15800000	16900000	16200000	16600000	16600000	16200000	15500000	16100000	17000000	16100000	16100000	16900000	17300000	17800000	16700000	16400000	16800000	16300000	16900000	16900000	16000000	16500000	16300000	17100000	16000000	15700000	14700000	16100000	16700000
LysoPE(0:0/18:1(11Z))	13900000	13900000	7009167	14800000	15300000	12700000	13500000	15000000	16200000	13800000	13800000	13400000	16800000	9611569	12500000	10300000	16100000	17900000	11700000	15000000	13600000	8071416	14600000	12200000	8656226	4574486	6459218	9666810	15500000	14800000	13200000	9519415	7264096	13700000	7028805	17800000	9957884	11100000	9893669	10200000	13700000
L-Arginine	13500000	11400000	15300000	15600000	10300000	13000000	15000000	12600000	14900000	12800000	13200000	12800000	12400000	10000000	12700000	15500000	11900000	10900000	17800000	15500000	13200000	16600000	12100000	10000000	12000000	10900000	13300000	19600000	9426776	11900000	13200000	13300000	15800000	15400000	15700000	15500000	12100000	15300000	7321007	10700000	13000000
Dihydrozeatin	16500000	6833239	27000000	20400000	12000000	22400000	18800000	8460864	12600000	15600000	16500000	20100000	13200000	16300000	22400000	14500000	16200000	14000000	12500000	12100000	16200000	23200000	21000000	10800000	11100000	19000000	21700000	20200000	10900000	10500000	16100000	7166214	24100000	13200000	24600000	14200000	20900000	12300000	6791558	7372646	16100000
Deoxyguanosine	36300000	34400000	28800000	39400000	36300000	46600000	36300000	36700000	25000000	38400000	36300000	37000000	25800000	41200000	45800000	37500000	43800000	31700000	26700000	35700000	36200000	34900000	47400000	33000000	30400000	29700000	24400000	30600000	34100000	35700000	36600000	26900000	24200000	35700000	24100000	30700000	42900000	34300000	26600000	28600000	36200000
Brevetoxin B Esi+ 6.7180004 :175	15398	15200	17144	17137	14599	12677	15417	13971	14819	16940	16575	16667	7437	14932	13399	18907	13921	14296	16923	13136	15822	11078	14156	13621	17419	13731	12740	16768	13521	9348	13878	18065	17961	15954	17067	16442	15246	18000	6444	14290	16453
Spinosyn P Esi+ 4.029001	8967	17300	9078	10450	11583	15412	6857	12634	3087	13951	7712	18551	11604	20698	17279	7209	26051	19894	9580	18110	21730	13089	9793	17098	6180	13657	15962	14225	8931	15353	9001	16842	15271	12332	13353	16090	19245	12492	18410	20758	13546
1,2-di-(9Z,12Z,15Z-octadecatrienoyl)-3-(8-(2E,4Z-decadienoyloxy)-5,6-octadienoyl)-sn-glycerol	3077	4487	5286	5387	3944	4298	5125	4898	4842	4967	5415	4110	4155	1820	5506	1889	5758	5026	4623	4283	3969	3981	4098	4295	6363	8444	6567	4589	5857	5520	4357	4105	4258	4192	4536	6491	4639	3550	1995	4833	5188
C36 H70 O4	10969	7494	16373	19864	10939	15657	15322	6008	9956	14550	9648	16155	5410	14087	17460	11618	16123	7983	13056	8993	12087	19718	14709	7267	7227	12025	9960	11559	6263	7959	12814	8714	13346	7540	14160	13692	13934	10811	29494	6603	11119
> limit Esi+ 7.328002 :173	9616	10182	9015	12292	10869	13167	10928	10973	10061	10502	11673	9506	6626	8848	10044	9024	10050	13142	4495	10395	9745	6066	9610	11649	8028	9565	8865	6864	10787	9994	9902	6388	10781	10181	10035	9347	8401	9247	8291	10537	9609
> limit Esi+ 1.2089998	5598	3133	4822	6164	6193	6852	4174	4480	4815	5605	5797	5659	2964	3868	4387	5744	4649	2645	5100	3388	4777	5902	4518	3721	5044	7380	4924	4529	5305	5897	5755	3821	6082	4318	4898	5609	7764	4253	1566	6204	5290
1,2-Dioctadecanoyl-3-(galactosyl-B-1-6-galactosyl-B-1)-glycerol Esi+ 1.4150007	16339	6903	8637	11176	11538	13607	11694	4855	2804	8544	18273	11235	8533	6718	10007	17383	12705	17342	15515	8834	20403	14878	11318	15093	10436	12615	10051	9646	9108	8168	15619	11857	3383	5871	8177	8470	9271	8176	9486	12021	20320
Zeaxanthin Esi+ 1.1969997	11722	8121	6492	9102	9924	7394	10097	15696	11533	2995	4824	12011	4050	6631	5961	16902	9066	10744	3930	10827	10296	12471	8146	11821	11553	5231	5683	12033	8379	5198	4665	2870	5236	11664	5406	8029	5764	8347	21844	5468	6082
> limit Esi+ 7.328002 :172	11101	13848	14913	3534	8958	18076	14929	15967	12779	13898	14961	18040	16573	13175	14232	15867	14925	15732	13856	13751	13989	4202	16459	17136	14495	12270	16423	13729	14786	6570	15003	14283	14860	12512	14983	13271	8615	12923	9605	16385	15385
TG(18:1(11Z)/16:0/18:3(9Z,12Z,15Z))[iso6]	5892	5365	5614	7101	4384	6551	6672	4114	8426	6818	4817	6543	5489	4704	3488	5454	6223	5548	7507	7654	4256	8587	6434	3775	5126	4095	5930	8667	5030	2982	3539	4470	7222	5996	6870	2625	3763	6656	2826	4540	6341
Brevetoxin B Esi+ 6.7180004	15398	15200	13400	17137	14599	15583	15642	13971	14819	16940	16814	17007	15348	14932	8920	18907	16840	14296	19765	13136	10908	8782	14621	9653	17419	13731	16333	20741	13521	2627	10279	18065	17961	15954	17067	9654	11159	6385	6444	14290	16453
> limit Esi+ 6.791996	9479	4213	6727	9459	9337	8821	8384	7918	8925	8799	6118	5908	8135	6536	5323	7449	8977	8386	7811	8726	5534	8768	8887	5733	8378	8365	8314	8619	8236	5202	5612	7647	7722	8568	8249	4252	6548	7527	7554	7708	8190
PIP(16:0/18:1(11Z))	51534	53193	38759	62572	45206	38344	101561	68205	104935	46406	53731	62753	40833	28343	44937	20724	53279	54269	50210	130519	51546	31736	46262	33432	31830	23242	35506	43994	27106	31309	50483	24537	44038	92521	42479	82599	16231	12866	30136	34084	46926
> limit Esi+ 1.3930005 :171	5591	10530	5330	20327	7387	24541	2683	8278	11879	7953	7708	6972	5482	5754	7353	9135	9523	16075	8036	5300	11137	12329	6135	4834	5688	7939	19217	8621	14731	6891	8469	11699	16183	3500	7702	11367	9784	12327	2933	12495	10040
C41 H80 O2	11037	7845	8664	11739	7280	10879	10639	9223	10409	11757	10092	12017	11441	8157	10441	10906	11221	11624	10439	9861	10605	8647	6566	6506	7172	7955	8198	9298	5495	8875	12213	8707	11308	12106	11257	12319	8545	9026	2880	8128	9795
Avermectin A2b aglycone	116199	135106	4038	822	3945	4811	3780	115392	6491	119240	122759	131500	134086	117479	3283	124813	4817	4485	125131	6494	121172	128459	117730	128084	3416	123878	117519	4099	122406	117388	122960	118756	3612	117418	101812	3818	4648	113570	79975	6455	2033
C36 H78 N10 Esi+ 17.42	49180	63938	63933	42549	43945	61161	50075	45287	47506	65006	59341	45296	54893	43922	44228	64638	42605	37633	57244	42765	37156	49771	61419	43911	45637	56079	39456	34095	62966	45940	65211	56585	47110	54106	63013	52746	44587	50809	50865	39461	57290
> limit Esi+ 7.061002 :170	42761	42347	39557	37605	39722	8948	34721	39173	8443	37119	36510	7324	22545	38537	9372	37823	34571	29475	19466	33260	38043	25601	7701	22145	39570	36513	35884	24580	35692	6960	36003	38376	29801	6654	32101	36178	6931	20987	29093	32256	39278
<none> Esi+ 7.3189993	11090	6689	12894	7567	5317	10939	9765	8187	8190	12140	8650	11374	10461	12128	10565	10272	12799	7242	10903	9213	10707	4689	10394	8567	10542	9096	8082	8770	8853	10534	9659	9015	9877	6659	9024	9015	11677	10089	2012	9970	7418
C34 H48 N14 O3 Esi+ 6.647002	22642	23509	19622	22577	22532	21159	22890	23969	23486	23272	22551	18809	21402	23037	18706	20319	19764	21228	19995	21367	21972	21220	20085	25009	24735	21423	22396	19991	22228	23997	23142	22185	20783	22726	16527	17156	23674	22146	24229	22105	23232
> limit Esi+ 7.093998 :169	10839	26842	36855	36481	32039	35117	26155	7351	30146	30013	35121	34823	11630	39293	29844	31685	11899	39005	30698	38925	32393	29018	33427	29142	36414	29491	37864	36947	31051	38073	29704	27015	32438	34005	36200	39400	10076	32892	20721	27672	38041
(R)-3-Hydroxybutanoyl-CoA	14206	16086	15650	14432	16824	14209	16508	13074	15449	16426	14374	13131	14666	14481	11694	17395	15061	16976	14136	8604	14345	10239	14699	17170	13232	17374	15781	7858	13224	15917	12486	14462	15675	16424	15550	12240	16230	14745	16468	15507	12000
Piperacillin Esi+ 1.215	27670	4319	5634	7803	5522	4630	7220	4853	6265	5172	21937	6156	6973	4505	7742	7814	5258	5343	7471	6311	23417	6557	5818	8229	5324	6506	4512	6872	4772	5121	28718	7251	5939	7933	5370	9116	6304	8731	6868	7429	33023
> limit Esi+ 7.192996	12514	12306	11996	11903	22785	8547	10519	12902	9451	26971	9856	9127	8606	12780	9830	9590	14701	3509	10318	10075	12946	10924	10229	11757	11136	9792	10619	9829	9560	11580	9752	8829	20865	17748	9761	12516	12808	8290	16207	11993	8441
> limit Esi+ 1.2039996	7994	8889	8655	8794	10770	7588	9812	9493	6302	9019	11129	9919	9219	6930	9167	9778	7846	9457	7019	7661	9285	11754	9538	10095	8694	8742	9263	8364	7884	9116	6811	8429	8545	10318	8564	7472	6652	8069	7675	9145	7169
C39 H49 N6	9576	9655	11093	13137	6404	9965	12670	9137	6982	9610	10339	13095	5566	9551	12061	13436	13017	8849	11569	9289	10162	15222	9936	7671	8642	9348	11017	11691	8652	8501	11783	7564	13230	10491	11669	11157	10410	11388	10663	10539	7256
> limit Esi+ 6.968 :168	8714	6643	8365	9152	5005	7798	6341	6596	8223	5510	8547	6089	8346	6846	7497	12084	4646	5253	4936	6789	6886	9220	5480	7804	5458	5224	9397	10234	6034	9112	8028	10524	6379	5928	8982	9034	8829	7686	3078	9834	6570
C22 H48 N8 O3 Esi+ 3.5609994	13760	11742	9790	1594	1650	2475	4933	40297	8062	9035	11941	6698	4458	20867	11332	43343	6398	7385	9824	10902	14456	15057	5721	5985	6648	1390	12968	10976	10582	5112	16351	10341	15428	7104	4125	3499	29928	15736	3395	14820	15004
C45 H8 N4 O2	4180	4778	4419	3661	2846	1605	2561	4028	6506	1460	4486	1502	4385	851	2522	5829	1120	1464	7783	6418	4157	3758	1464	2218	4824	3884	3444	10284	2366	2176	5701	7822	4566	8974	5470	1216	1736	7336	2794	1873	3899
> limit Esi+ 1.2130003	9892	10229	9471	11274	11455	15047	11311	13156	9682	12683	13668	11921	10773	12823	9451	11308	12895	13379	9862	9781	13569	13227	7837	13701	12597	18640	11448	12302	15279	10238	13681	10286	10931	10171	10639	11889	9938	13080	8412	12395	16684
> limit Esi+ 7.2680025	10868	10556	10423	10634	6962	9588	12096	9855	7529	9994	11902	7506	11544	10899	10582	12743	11343	8479	12470	11082	11549	3735	8457	5299	13263	11618	12348	9032	11440	11149	11929	6304	9393	8738	9700	10116	6690	7867	9922	11793	10208
> limit Esi+ 7.2049994 :167	9273	8563	7939	10276	6692	9130	7963	7151	7353	9130	7546	9289	6750	8926	8969	8350	20643	7388	5800	7554	7452	7271	9273	8243	14980	18121	7196	5035	7260	8781	7544	8675	7867	7102	7949	7939	8755	6650	13890	7009	8835
> limit Esi+ 7.191999	10175	11957	8646	10646	12351	11725	8536	13553	9071	13375	10169	11128	7522	13306	9546	9902	14027	7342	7669	9269	9098	9764	10150	8728	12146	12686	7329	9502	6977	8521	8392	11018	12357	9270	8597	8372	9968	9647	6668	8953	9424
> limit Esi+ 1.4910004	12317	2893	4133	7676	4528	7475	6476	2028	2848	4746	13639	7060	2521	3404	4541	8738	7821	10565	8222	3139	12961	8227	3267	3291	6151	7714	6712	3933	1770	2075	9500	4570	3978	3592	3802	5378	4764	3691	4229	8707	11417
> limit Esi+ 6.7989984	10172	10870	11903	8050	11982	7221	6883	7610	9619	8538	7659	9477	8291	9083	6819	10849	8334	6279	11416	10348	6654	8048	7734	7377	8553	7107	9316	12258	10085	8806	7954	8178	6763	9646	10605	5969	8322	7549	7596	8043	7701
3-Hydroxy-3-(3-hydroxy-4-methoxyphenyl)propionyl-CoA	17080	17237	17657	16948	18203	21221	17909	18381	17074	20132	18626	19529	18130	19150	18755	18191	18261	21162	15510	18605	18234	8542	20049	21084	18247	17543	19665	13505	18704	20270	17627	16300	11320	13988	15644	20835	18345	18703	11920	15209	19243
CE(20:1(11Z))	3806	6973	5332	2518	5455	4463	3925	7984	8111	3224	5759	3124	5474	1948	3783	8145	3182	2707	10993	6692	4867	5491	2775	4203	5803	4286	5258	10036	3954	3821	5981	8879	5993	10768	7118	3379	2867	8203	4255	2042	6644
Decabromodiphenyl oxide Esi+ 7.309001	12225	16628	17102	14237	18154	18436	17987	16048	16762	19360	15900	17294	4598	18957	16444	10846	17122	18800	16622	17929	16855	1454	19060	18430	17327	17378	18525	10263	18311	18424	17268	17110	6243	15585	18134	18522	16685	6578	15193	16516	18274
PE(24:1(15Z)/22:0) Esi+ 1.2589998	12299	27505	10693	12952	30839	38959	14629	26422	27111	12438	19755	11732	12472	10966	16159	3643	25105	10241	26071	12017	18932	10548	28684	15335	11295	33729	24388	29606	26699	8655	21476	27387	2658	15539	26526	27243	11431	25611	5184	9531	15455
1,2,3,4,6-Pentakis-O-galloyl-beta-D-glucose	8148	15123	9995	9545	15863	8027	9402	6452	8433	15341	8498	8399	7751	8815	6907	7471	15236	9005	6551	8438	8870	7177	9576	8301	15248	14046	13885	10007	8990	8170	5577	6819	7205	8162	7688	8225	9547	8475	12803	8399	8979
> limit Esi+ 7.002001	13048	11247	12052	13010	11889	10387	10326	10987	10412	9357	10674	8332	8564	8042	7145	10420	7800	7123	8319	9297	8293	8289	7269	7692	8725	8923	8282	9531	6832	7556	8835	7420	8538	8147	7867	9542	7180	9501	7590	7464	2298
PE(18:2(9Z,12Z)/14:1(9Z))	11560	11208	9566	8310	8706	6572	8913	9102	8456	10903	15365	9725	9478	12853	9612	18072	9915	6957	11098	8554	18438	7443	6499	10004	12592	17311	9723	18337	9012	13042	14723	11893	5882	10942	13882	7594	9664	10767	11172	11156	19740
C34 H48 N14 O3	23023	23760	19622	22630	22257	21598	23132	24208	24016	23272	22839	20128	21609	23371	18706	20319	20174	21228	20667	21525	22362	21220	21580	25604	24735	21908	22326	20013	22104	24931	4378	22185	21033	23621	17803	22127	23787	22146	24717	22481	22980
PS(18:0/20:0)	7949	6656	9570	5574	5991	5156	7059	6643	7642	6006	7578	6427	5824	4847	5820	9465	4720	5557	9569	9031	7438	7900	3222	5320	8125	5639	7239	11302	5721	4833	2528	9775	9895	8841	10260	6270	5287	9479	5519	5083	7643
> limit Esi+ 7.1060004 :163	27674	18186	28502	30657	13661	12373	28174	19832	33999	22132	26935	31814	35325	24775	31746	32348	18405	29531	33576	34664	29628	31485	32607	32096	18466	18224	25272	36284	27526	30651	16038	25446	26901	27553	28477	29413	29611	31074	2499	27394	27154
> limit Esi+ 1.1759998	7473	4918	3765	4605	6682	5126	2950	5464	5391	4981	9097	3439	5874	5221	4334	10777	4229	4338	4418	4094	7882	3120	3528	4157	3893	3351	2657	3215	6210	4770	7632	3246	4711	3642	4245	4758	2844	4135	4315	1739	9628
PE(24:0/22:6(4Z,7Z,10Z,13Z,16Z,19Z)) Esi+ 1.3670003	25291	7940	14045	15368	15391	19500	13758	9073	9585	14807	24641	15510	9137	11045	14757	22460	16118	26045	17655	13048	18862	20827	13746	12540	15291	17659	14373	10407	11937	10788	20490	14224	7822	7063	11897	13713	13364	12237	15190	19521	21685
Spinosyn P	8967	17300	9078	10450	11583	15412	6857	12634	18180	13951	7712	18120	11604	20698	17279	6919	26051	19894	9118	18110	21730	13089	12788	17098	6180	8322	15962	14225	8931	15353	9001	16842	15271	11930	13353	16090	19245	12492	18410	20758	13546
5-Nitro-ortho-anisidine Esi+ 7.7940035	15362	19189	32738	43533	20533	20511	28508	21413	25552	26189	19065	21865	16624	12368	21560	14630	25551	17165	29826	45400	24637	39939	19840	12481	22373	12601	14626	23293	16925	24238	15911	21648	27456	14709	18709	24574	15322	17267	8266	14635	18861
> limit Esi+ 1.2529994 :162	26958	9392	8405	13491	11918	19115	12002	28676	6851	6885	9209	21063	20916	15692	8377	12548	9238	19187	12376	14195	11598	12072	3563	15346	8748	9088	9017	16914	10155	10559	24988	10000	18638	9564	8055	10020	27166	18943	3713	8755	20210
D-Sorbitol Esi+ 4.48	42501	27196	38187	13660	27134	21100	27977	34982	30590	5645	41161	34119	34836	41956	43367	52155	10408	25503	34450	23942	40909	17141	36025	30821	50139	41987	45636	62109	35495	49844	39200	48723	62800	43116	61406	21756	51604	36137	22815	26939	40624
C23 H51 N16 O3 S	8829	21541	20010	20330	6477	2856	7552	10286	16879	11421	23935	16243	9247	5191	18327	9669	7925	14259	6202	14246	20042	16040	13708	8037	8978	10584	6643	14814	16791	12735	18664	22396	3706	8769	5933	12437	6083	14024	16674	16218	7360
C30 H63 N9 O3	8251	9223	10689	10989	13106	9028	7412	4890	10876	10732	9221	11096	9226	13671	10947	10874	11052	10191	6740	10246	10450	8863	10732	11175	9835	11481	10246	10556	13461	8992	12900	10468	9455	11140	11334	10638	11509	8837	6686	10486	5864
> limit Esi+ 7.188001	5975	1404	6153	9714	8229	7102	4913	8162	8563	8851	7262	7330	7399	9331	10506	6561	11672	7605	7683	7598	12226	9099	10137	7550	6995	8895	11458	6579	6832	12363	6113	9986	5467	6545	8599	9441	9477	5906	1350	5176	6227
Molybdopterin guanine dinucleotide Esi+ 6.9700003	8293	7121	7247	12107	4721	8746	7126	5463	8783	6136	7932	5774	10009	9733	9034	12237	7511	7908	7006	8864	9483	9783	9170	8266	6325	7603	11286	13373	5085	12193	5508	11524	7543	6955	10539	11278	8515	9490	2831	11337	6272
<none> Esi+ 6.828002	7040	9940	9476	10219	9753	7742	8125	10434	11693	7900	11548	7595	9515	9243	8964	7673	8410	9226	5004	12579	10034	9616	10007	9569	7664	9920	10338	10422	8422	9568	8576	10336	8679	9615	8713	8049	8435	8825	10149	8083	9275
> limit Esi+ 7.291996 :161	23209	15668	20382	23943	11731	20778	22307	20785	17113	22990	21698	22791	24027	25208	23568	18023	21096	23908	20366	22571	20189	12613	26433	25060	18541	21155	22926	20661	21322	24187	22540	20497	18552	14974	25063	18386	21929	22414	7032	21080	18433
Guanosine diphosphate adenosine Esi+ 7.9620028	5698	5427	6008	5400	5106	5802	6160	5492	8032	4906	6896	5745	6673	5187	3993	6046	5088	6081	10627	9732	7770	6651	6190	4976	5655	4185	5656	10870	4984	5976	6624	7339	7662	8422	8931	5821	7221	9524	4289	5064	6273
C28 H37 N17 Esi+ 3.514001	28221	18984	25520	26901	18794	24919	22239	22838	21111	20044	24059	26873	25011	27567	29600	29320	24393	26715	26792	31003	22396	23843	27901	23868	24031	13278	19156	27385	24777	27720	28151	26737	26470	23337	22920	26160	25417	26622	18284	26260	23244
3-O-Sulfogalactosylceramide Esi+ 1.3549997	13550	13116	12457	13665	8886	13844	15651	12795	12977	13709	18316	19469	11516	15454	17407	19090	12301	10732	12488	18494	22196	21540	12749	14037	14634	13638	13882	17797	18985	14907	21227	12722	13614	12321	11070	12263	14050	11288	6784	14962	12964
C27 H5 N7 O13	8012	8064	8124	9485	5485	7516	7535	7252	8641	4827	7446	7264	8065	9394	5565	11600	4103	6263	6818	7709	8050	8303	6334	7824	6671	6106	9032	10158	4157	10612	7846	9349	7710	6219	8057	9945	10398	7624	1897	12169	7306
PE(22:2(13Z,16Z)/22:1(13Z))	55060	97792	84538	75998	62124	26559	93432	88846	82413	99269	66940	44175	95202	44347	48035	40190	89974	85291	67011	68438	53607	46137	39100	56016	45275	54929	65475	21707	97663	81010	56446	61448	59587	68295	43369	64526	29587	50890	47779	69858	42112
> limit Esi+ 6.968	8138	7780	7678	9687	6115	9124	7726	7672	9628	6004	8209	7088	8698	9052	8230	12698	5989	5650	5281	6724	6880	8017	7571	7614	5600	6912	9374	9720	6742	11210	6976	9668	6968	7201	8101	9640	8968	9107	1692	10904	6821
Taurolithocholic acid 3-sulfate	8190	4073	9585	6389	11057	9337	9391	5899	7657	9246	5457	11208	10607	7249	11608	4277	9684	9361	7455	9019	5811	9200	11098	7447	8712	9270	4973	5627	8912	8380	5942	6822	9643	2960	4501	10241	6446	5782	10007	8583	6630
> limit Esi+ 7.0209975	13430	13585	13907	11437	14227	9786	12882	11165	9824	11640	10656	9192	9155	8511	10208	8606	10390	9599	9048	9993	8938	9168	8488	8316	8013	9774	9610	8912	9790	8828	8812	8371	8319	9449	6285	9817	7395	8673	16357	8475	8173
C32 H2 N O7	9034	6316	9383	7193	3982	7425	6321	6231	8986	5078	6657	5419	7875	7703	6496	12009	3865	5207	5939	6377	6751	7021	6793	6036	8347	6663	8758	12088	4196	10249	5648	10603	8605	7216	6543	8699	8373	8638	1138	10286	6564
<none> Esi+ 6.9700003 :160	5737	4660	5144	6849	2622	6090	3284	3344	5919	3504	3489	3517	6560	6241	5534	9692	2844	2492	2766	5520	5431	7131	5117	3606	3624	4785	6347	6587	3127	8092	4216	7310	5232	5055	5433	6455	7260	6300	3111	8063	5306
TG(20:4(5Z,8Z,11Z,14Z)/14:0/18:3(9Z,12Z,15Z))[iso6]	11226	9713	10361	9113	11336	10097	7466	10194	9652	10857	10529	11031	4915	10884	4801	11592	7383	11374	4684	11682	6623	2078	11101	9874	13277	8717	11844	9957	9347	10149	12657	12509	11809	9984	10282	9596	8513	12935	10364	4100	12157
> limit Esi+ 7.3299994	16032	10902	17844	18894	9127	15011	14768	13342	12047	14985	13463	17719	15759	15024	15055	15559	17113	16617	11758	17579	13973	6514	15293	15362	14951	13136	14488	9859	13486	17314	16376	12643	13208	12903	15995	14678	14614	13803	4576	11609	12980
N3'-Acetylneomycin	53596	10084	51247	11205	49917	11095	9724	10520	49665	49307	9849	10933	53620	11092	50016	13144	47451	11318	11528	11636	46692	10995	11338	49597	11131	12249	11610	48754	49980	11636	11903	51485	10968	47670	9645	12253	7768	9513	6552	49603	11432
C36 H49 N10	7578	8726	12330	6232	4218	6872	4977	6921	6157	5508	7856	8973	5009	6383	7630	14791	5691	6969	6759	5071	11058	8853	5474	5287	7852	7688	6276	9147	7894	7494	9552	6914	6254	5799	8192	7580	9100	5956	7665	7615	8504
> limit Esi+ 1.2459995 :159	38216	35662	27445	34658	32591	34237	33333	31415	29566	31882	17706	29797	30493	9878	13832	17553	16356	34840	16215	18497	8628	17131	10323	16821	27687	8753	28755	34073	28136	27910	19586	31102	14269	26276	13863	31579	9000	30468	16104	19427	19238
> limit Esi+ 7.2879972 :158	22709	14638	27454	20245	11851	18126	25157	15188	16081	17004	20513	22573	20048	14533	20701	36664	20768	20231	40956	21920	21653	23864	24404	15897	30185	16888	24309	48105	14421	17263	24352	26049	31391	19750	25714	24796	13678	27405	8927	17978	22927
> limit Esi+ 7.283 :157	16704	14385	11869	15732	14941	21361	15790	14147	14409	17595	19338	21202	18086	18717	17264	16929	19621	20384	11965	13070	15058	7878	21603	20364	13898	16137	15570	13367	15113	16773	17933	14804	11921	12885	13305	17118	15985	15163	10646	19852	15606
Callichiline	41050	27543	22256	27980	29123	30260	31475	20953	25351	17167	44827	8251	26052	23600	27142	50575	25120	40016	16832	16066	44726	32426	22983	23564	31767	8972	16537	15815	15436	865	48659	26071	23658	23695	25947	33355	19939	31198	12966	9774	42869
C25 H Cl3 O12 S2	15015	13862	13656	16132	15944	15504	15783	15378	17362	14478	13578	16339	14566	15273	13264	13011	15844	13184	14645	14635	15458	13360	14437	13950	13586	14175	13490	14590	12676	14293	14826	13328	13325	13839	13919	15982	14550	12871	12618	14485	16000
3,6-Anhydrogalactose Esi+ 8.341002 :156	152628	7296	125424	190936	110769	56684	154205	6221	114092	147987	172994	284456	86510	204141	276119	204964	130393	85726	146296	109937	166035	192402	250618	153026	149915	173447	140024	140408	67644	135845	146939	115887	122422	114567	132204	192952	313134	209766	41291	140518	159635
PE(20:4(5Z,8Z,11Z,14Z)/20:3(5Z,8Z,11Z)) Esi+ 6.647002	28174	21785	35554	15987	20821	23058	23446	20907	33529	32905	20374	17394	27644	18924	21155	41798	26643	12866	46673	17684	29519	32349	16429	18062	30233	27647	23961	43249	24088	22341	33759	35218	34498	21796	34391	32118	20165	34309	6682	22260	25785
> limit Esi+ 7.3250003 :155	13988	10476	15946	15000	8212	17347	12892	13554	15124	15231	13328	14002	14845	16546	14654	15548	25417	17422	12943	14274	13859	6837	16204	13139	14093	11705	12236	13964	13287	14813	11489	16595	9642	11761	15726	13317	14409	14606	6054	14265	14942
> limit Esi+ 6.9920015	13712	15627	14607	14786	13477	14010	13590	15580	14269	13250	14674	13538	13468	12915	13927	15133	14741	13558	14051	14319	13556	14293	13277	12847	12891	14522	15191	13775	12596	12961	13314	15215	14644	13139	12196	15220	14402	12520	11497	14510	14101
<none> Esi+ 6.7839975	13716	13554	13145	13460	13393	13497	13182	13566	12151	13577	13068	13216	12298	13152	13079	11214	13788	13338	12528	13630	13729	12880	13158	14216	12126	11478	11643	11190	12103	11413	12621	11804	11178	12650	11602	12507	13394	10686	11816	13391	12459
C40 H48 N11 O	7942	9855	9658	9012	9972	10197	10025	8519	8118	8455	10128	8559	9855	7003	8748	8613	8607	10253	9861	9295	9953	8170	9597	9614	9789	15266	7679	8538	8288	9288	8518	8573	8113	7763	9068	9833	8548	5666	6372	8008	10062
C52 H87	12548	9964	16557	11399	9237	14022	14861	10879	8904	12614	13660	17395	12832	11791	12937	17758	15765	13298	17828	15167	15196	15683	14842	11102	18682	11228	10146	22983	12035	13243	11672	15947	19426	13059	16805	15940	12083	13096	7175	11200	16073
> limit Esi+ 7.0330005	20157	18573	20299	16611	18646	16677	17219	17300	15644	15331	16465	14149	8852	12655	13671	15275	13012	14511	16786	14553	14106	15628	13922	12114	14370	24666	13853	17334	13208	3000	6879	12826	13979	14503	15377	13991	11715	12088	21509	5676	12060
> limit Esi+ 1.2509997 :154	22581	22445	22236	20922	25533	15320	24105	23395	18934	24698	33798	15416	7956	6345	19749	25833	20393	36677	20891	30777	23600	25017	26509	12571	19572	23840	15049	16324	27417	9922	25227	8611	17243	29222	16487	31348	25808	26009	19002	6297	29152
> limit Esi+ 1.2540005 :153	13857	11132	10640	13431	10837	12529	12769	2631	14309	7437	15133	17219	5360	6386	13745	13130	8407	10999	10460	10473	5872	7113	12473	2113	8321	17845	7324	11272	12885	5434	13309	5509	13656	17162	9875	11694	10545	8445	9606	4754	13130
> limit Esi+ 1.2509997 :152	20346	13521	8155	14733	15795	14950	11968	15364	5734	14065	19304	14128	8369	18240	10804	16475	18272	11931	13626	13944	21015	11467	14324	18869	14483	18375	13186	9539	13933	13851	16048	14758	9943	8663	15724	16045	16036	11636	13696	18030	20260
> limit Esi+ 1.2680005	14997	9008	9404	7236	14398	12670	4814	8955	15880	8966	5278	13442	8770	12524	15474	5786	8287	13716	14324	14035	8410	7008	11828	15563	16606	13621	2384	17555	11945	11961	14799	7238	7174	15513	11854	13704	13147	8671	3374	5343	7360
C21 H36 O26	9414	35850	83103	9962	5776	12846	5611	49745	56614	7605	65769	9531	13037	10135	12728	86351	6108	11322	86539	6529	7269	42493	14169	65173	70717	49623	15313	103148	10364	8728	69666	8389	12367	3544	13229	73861	11071	82655	13784	66729	7146
Brevetoxin B	15398	15416	17144	17137	14599	15583	15642	13971	14819	16940	16575	16667	15049	14932	13399	18907	16840	14296	19765	13136	16116	11412	14621	13621	17419	13731	16333	20741	13521	9588	13878	18065	17736	15954	17067	15617	15246	18000	6444	14290	16453
> limit Esi+ 7.2049994	9744	21352	8911	22855	19598	9596	9607	14790	8976	18097	10737	10004	8117	9963	8437	10259	13377	8523	8176	9866	8262	5927	9653	9334	9863	18860	10187	7096	8918	9537	9010	9334	8134	9328	10811	8049	11272	8508	11765	9367	9147
Cimicifugoside	68350	49095	49847	50973	52303	59209	60104	40163	53592	47543	62718	60644	55788	46789	53879	73762	50527	15826	47944	47091	68927	60999	52289	56899	51593	44032	44685	47161	53881	53076	58591	48897	46378	45306	48580	50305	43127	5238	43134	63341	60228
2-Methylbutyrylglycine Esi+ 6.544999	77767	101803	51402	101087	60671	31715	76650	93043	75616	114245	82534	40582	41313	17533	42416	126825	92069	38835	105243	103271	73139	82017	18915	38653	140191	104836	56076	77213	36726	19454	73831	108769	54648	75141	44856	129019	33878	77697	84920	34626	73710
> limit Esi+ 1.5709995	14196	13174	12443	13089	10812	8804	9744	13125	14806	9300	10491	11532	14682	7887	10134	12425	10118	14982	15322	15040	10944	8871	11229	12921	12119	12373	10603	10953	15916	11085	10344	13731	12107	15820	12268	9791	8220	11601	13857	12591	10977
> limit Esi+ 7.0090017 :150	13880	14478	12463	14532	13358	12054	11902	11212	10645	12743	11929	11243	9682	11412	11385	8954	9668	9865	9300	9654	11479	9095	9252	10333	8005	11269	8492	10393	10393	10071	9386	7854	9277	7220	10408	12371	8340	6497	7461	7751	9059
> limit Esi+ 7.0090017 :149	18346	20167	18451	18557	21247	15125	17183	11930	14453	16422	14522	12360	12482	15264	12579	11822	13324	13539	13843	12364	12466	11856	13289	10458	9093	14681	12222	12810	12145	10762	12444	10286	13810	11142	14215	15305	12476	9585	11042	11712	11566
Dodecaprenyl diphosphate	20862	16487	20852	21665	15209	22208	19692	16697	20503	21117	21310	22848	20077	23301	23346	18936	22591	21849	17637	20020	22262	8587	25931	23447	18007	17692	21048	14870	20565	21610	19100	15328	17211	16375	18964	20062	22795	17388	9794	21197	19108
> limit Esi+ 1.2560004 :148	14117	15704	11965	15258	9850	12778	11353	7034	13697	6962	15073	9644	9211	9453	15082	12526	5286	7293	13808	12518	9413	8913	12446	10497	10773	14845	9188	10755	12267	9035	12901	10832	10438	12975	9367	9637	11069	9600	9398	8279	10361
> limit Esi+ 7.0090017 :147	13551	13389	11988	12928	11515	13528	11893	11230	11457	12314	11654	14105	9271	12863	11848	13386	10285	7910	11829	12706	10686	11164	11547	11198	13039	13456	10950	10644	11311	11505	12788	12135	8790	9387	9738	10588	10636	11455	8523	11904	13368
> limit Esi+ 7.2940035 :146	20339	14474	23146	17394	10234	11610	16538	13545	15361	19553	21010	23418	17082	19640	19083	20703	19529	16743	21050	26556	16630	9998	24001	15202	22855	14046	17566	24477	16128	19667	19246	17254	14837	11359	18670	17600	16945	22780	6753	19104	19673
Haloxyfop methyl Esi+ 7.095998	861814	630043	874335	890285	570701	947626	826051	728977	955372	10056	837462	868206	857	788602	881931	903791	11056	925979	967290	3584	835005	900696	917359	931866	705548	603587	809190	979198	875643	930912	824592	793474	879830	1988	834273	845666	861569	954011	386564	872543	814644
> limit Esi+ 6.9609995	13618	7024	10787	13937	10710	11418	11183	8836	12918	12070	12282	12413	10927	11869	12100	13428	5785	10795	15390	8379	13126	14630	10480	7325	10883	11350	11976	12568	11893	10233	13104	12961	12854	11394	13100	13708	12436	12167	5268	12043	12065
> limit Esi+ 7.2879972 :145	29371	20478	27802	26522	15002	30894	26091	21886	23485	23476	25023	31390	24556	25667	27556	26396	27566	25941	20795	19149	25514	13216	30910	26993	26533	20932	22332	26095	22731	28793	24045	26402	20196	18024	23707	24980	26106	27141	9257	27958	24469
N-acetyllactosamine Esi+ 7.7109995 :143	118791	39541	199327	61032	28674	102428	94336	46594	47468	40883	120178	104045	66648	82415	156950	278319	32879	58941	213508	58361	127031	268884	113618	108840	238049	186493	234866	241447	25911	130607	128660	188339	239313	71131	234289	96425	128236	282719	14984	119886	130768
> limit Esi+ 7.270997	11539	14821	13738	15556	16378	16667	12963	15927	16754	17080	13346	15037	14175	10777	17124	12650	11034	17929	5765	14576	16264	5728	8581	19605	13019	15781	6095	11937	9416	14270	15062	8994	4639	14695	12827	16638	14503	13037	13040	16336	11225
C24 H14 N11 O	7539	4061	7732	8709	5982	11461	6831	5096	7595	11321	9190	11307	7620	9170	7447	5223	8625	9881	6324	10923	8882	9575	9378	7254	6017	7075	6447	5355	8096	6944	7079	6040	5438	5214	6937	6762	7816	5864	3053	8579	6964
C21 H13 N9 O6	13199	8712	14574	14119	4154	17497	12806	10213	13245	14735	12863	16159	12441	11606	10688	8917	9535	12587	8105	12490	10237	4777	14058	12223	10157	9964	8107	10084	11913	12957	11076	8846	7442	8400	9983	8493	9876	11862	2725	14329	10680
Oleandomycin 2'-O-phosphate Esi+ 1.2050006	19043	14458	13755	12710	15467	13569	16880	10056	11401	12309	18662	11489	15194	10255	8961	35760	10336	10592	7039	12189	18575	12895	9546	12063	11348	7463	9883	7299	11549	11917	18166	14139	11030	12631	13653	14111	14318	10682	2649	9744	15854
11-O-Demethylpradinone I	12724	11786	15435	11082	9047	11895	9151	11109	10011	4962	11589	12428	15811	12557	13112	11647	7992	10405	13312	13338	9207	10327	8199	14649	7808	7794	9449	8830	10649	11284	10510	12130	9973	9712	5851	10839	7641	10440	4178	13089	8515
> limit Esi+ 1.4739993	10083	12264	13948	13781	9944	13993	11048	13360	12100	13408	13831	12528	10990	9755	11778	12555	10414	11524	12566	13228	13782	13079	10912	13081	11824	12283	13737	19624	11316	12039	11581	14381	11489	11707	15474	10828	9137	14760	7791	12648	12676
> limit Esi+ 1.3600004 :142	49408	3826	22945	33178	27062	41853	23842	16653	23411	33799	51008	39217	20073	18006	26971	42652	35757	61007	43039	19186	48936	43164	21102	30102	38746	31713	32630	26983	26072	19294	58737	34543	15074	20055	15651	34429	25016	17536	30021	43335	43948
> limit Esi+ 6.5209975	11627	7246	10910	8514	8643	7484	8628	6199	10411	7274	7920	8816	8827	6476	5237	14400	5619	7842	11861	11157	10900	11979	7132	4639	7204	5749	8009	13257	3618	8554	10857	12191	11589	12093	9507	6064	6888	13068	6997	6948	7383
C47 H2 N O6	10461	10208	11041	12151	7775	9810	7356	9654	11656	7773	9144	9437	9200	9193	9546	15469	5537	9087	9335	10714	8541	10972	7514	9949	8760	7735	9936	13284	7729	12718	11770	13609	11667	9274	11232	10878	11861	12290	5442	12803	11063
> limit Esi+ 7.188998	14402	10152	7478	9344	8889	10960	7501	8278	8448	6015	6792	14603	9321	9770	14424	5946	13222	8311	14932	10414	8682	14641	10296	10112	7952	4415	8941	8262	6030	9175	12982	9294	5416	9366	11832	8082	9073	7067	6433	13020	9115
C28 H63 N13 O2 S	12486	6368	10432	11781	9050	11667	10074	9017	11709	6554	11236	11582	8132	8431	9608	8710	10171	9494	12588	10591	10971	11154	11627	9502	10446	9308	9199	10740	6106	6543	11165	11350	10255	11715	10734	11577	6987	11373	8182	8613	11662
C49 H84 Cl	17702	10217	17155	18972	13343	19757	16656	12562	17736	12496	16838	17262	12544	15982	17858	11719	12515	17651	16302	17544	16385	7772	16951	13848	16273	15393	11664	12781	12350	13046	16171	14218	14572	14826	16049	19383	11070	17003	10798	16724	15521
<none> Esi+ 6.970998	16668	13663	15334	16142	14322	15297	15183	12990	16015	12694	16624	15638	11129	16075	17244	11616	10744	13628	14239	15152	16271	16303	14413	11990	16838	15022	10082	13109	10449	12318	14837	15690	15920	15787	7554	17034	11249	15097	12768	14031	14867
C35 H56 N11	47008	30637	51629	42421	41358	34026	38582	20613	36270	30552	42766	44458	24409	34871	38078	21605	21037	26510	36951	22590	36072	54116	39689	15368	35852	44505	36918	25991	18372	21710	25144	40278	49922	45181	62344	35438	21017	31798	34714	28851	29047
C22 H6 N5 O16 S	10148	7904	7306	11116	6610	10734	10222	8192	11214	7977	11228	10817	7183	9612	9520	10617	8707	6384	13524	10780	11606	12252	11119	6213	9451	8294	9689	15039	7994	6769	10160	6549	10466	10118	7517	12015	9534	11758	3035	8403	10949
> limit Esi+ 7.2940035 :141	20488	17021	20225	21333	16389	20084	20656	16839	18171	22330	20223	23099	22760	21048	20301	18580	22619	22018	15585	20087	20428	8129	18805	22615	18883	19747	19793	16749	19762	20423	19797	16553	14432	17869	17336	21147	19839	21422	14165	19564	17876
> limit Esi+ 1.2470006 :140	20270	20625	31584	24419	19350	10155	39411	24898	35182	44086	38557	9791	34827	15206	22165	2663	17705	23405	22084	20058	22342	40762	21121	16972	18338	47114	10673	26994	30127	28130	41151	14745	12049	13986	33682	40978	20680	36776	12065	22257	18259
PE(20:3(8Z,11Z,14Z)/20:3(8Z,11Z,14Z)) Esi+ 6.645	37843	31911	28643	40179	28429	36748	27003	33816	35304	37419	36044	35436	36387	33362	34825	43175	35118	31589	47194	34061	37543	45534	35466	25882	39134	34166	38276	52153	30710	35228	38969	51414	41971	33793	35519	40313	32158	42581	14286	32139	34855
> limit Esi+ 7.338001	21421	18724	20325	23115	16557	25625	22403	19139	20181	21564	20774	21799	21975	19543	18216	19695	23847	25042	13122	21796	19193	10710	20918	24428	17386	17416	18471	18484	18110	23009	19900	18088	18822	19560	18190	23589	21468	20042	11771	22667	22075
<none> Esi+ 1.4300002	14644	1457	4911	8090	7407	9632	8023	4514	3427	10035	16141	10113	3753	4612	4859	14313	10443	17338	9504	4417	13747	11751	5982	6874	8214	10754	7636	5550	4761	3714	13792	6469	5173	5668	1182	6886	7495	4698	8678	12517	16706
> limit Esi+ 1.4819994	20015	20474	21546	19122	21195	18438	20986	17314	18035	22544	23134	14797	19282	33576	18668	14641	16714	14338	18818	22101	23841	20819	16835	18828	14938	13349	14556	22172	14392	17245	21345	11650	13596	18790	33570	18657	16533	14556	19411	22023	19264
C21 H22 N14 O8	8479	4223	9762	7939	5256	11695	6301	2549	7620	4777	8673	10374	11747	8424	10766	9359	3706	10088	9864	5997	7631	11254	13276	7408	3186	7861	8642	8913	8303	13055	7065	8986	11540	3338	9269	6428	10135	9527	1481	9031	7841
> limit Esi+ 1.2589998	16586	11072	13913	11514	10024	12956	11124	5972	13087	17727	11346	9418	9459	11413	5945	9032	10658	7013	15138	14152	12350	16467	12725	5416	14614	10481	9356	15214	9140	12910	6183	11711	10756	13494	14217	12724	5838	12283	12123	8050	9957
N2'-Acetylgentamicin C1a Esi+ 5.3659983	15368	23106	1161	5917	3971	7801	10274	11629	7465	7003	11324	22830	21443	879	6493	1459	3560	22680	6002	6060	5249	5931	18274	5324	2749	1520	3274	12099	7108	8147	5331	1990	5704	37489	6723	4979	6433	3876	7727	5677	21381
> limit Esi+ 1.2060002	31524	29384	16295	29049	23543	37849	27226	31736	27308	28370	49417	25574	23178	19243	22787	39766	19920	25350	21513	28749	23651	45621	16447	24475	18810	22416	23459	34003	12433	23197	22408	23655	23721	6962	19845	22039	28216	15824	24005	28409	21815
> limit Esi+ 7.0090017 :139	11923	13591	12337	13849	15443	13722	11746	13838	13557	13565	13199	9349	12336	12038	13045	12866	13046	12265	10500	12348	13743	11592	12590	14742	13677	14811	12849	8871	14083	12210	14039	13643	13408	11183	11555	13317	13030	10882	12534	13574	9792
> limit Esi+ 8.873996	15802	19550	12338	5864	14504	6813	14976	18095	14215	6880	14261	4208	16279	8187	7781	16005	8523	20414	12137	15567	15510	15681	6797	18877	15189	18789	15718	6468	18499	19033	14149	14762	14963	15092	13363	11563	6195	16302	16869	19803	10940
> limit Esi+ 7.029002	16541	18012	15492	15911	15076	13047	13798	14863	11644	14641	12034	13539	10714	11509	12842	10678	12063	10380	7634	11084	11489	10049	9988	9846	12408	11917	12338	9806	9679	9513	11614	10723	11442	10265	10552	12112	7642	9164	22089	10298	10492
Gallotannin	8604	13530	20799	5296	7285	24429	20287	15147	17914	16652	17633	18566	15595	20362	16728	21701	16576	16097	14307	18461	18743	12908	19529	5334	20427	4007	17218	16611	10798	18689	16960	15758	19072	15285	18286	17200	16952	16352	1434	17517	17432
1-Eicosanol	12891	13656	10382	5432	9143	10444	9419	9497	11122	7473	9686	7436	6195	7405	10150	15366	9314	7318	6040	8969	10864	10247	9844	13913	11910	12447	11365	5077	6901	7731	12533	9317	7304	5920	7975	11007	6428	5814	9818	8548	12507
Clorobiocin	26037	19734	31160	30551	12908	29796	25339	20151	24599	25053	25758	25311	26572	23243	24221	25966	26967	23907	21165	25436	24073	16340	25230	23537	23491	18986	22728	23521	19904	23715	22546	19078	23320	22887	22638	26827	21324	23879	7797	26313	22508
C42 H63 N6 O3	10866	19822	17615	32312	16187	17970	29160	24208	35651	29000	10986	17120	13696	18274	25426	15901	51408	19462	14400	16527	23436	16142	26740	17757	20929	15164	16027	12382	22776	7251	21391	12479	19976	20017	12566	22596	11905	14613	13543	15088	14204
Lactosylceramide (d18:1/25:0) Esi+ 1.3699998	60580	17751	28360	39960	30055	37907	34151	18628	22491	31848	61176	38534	21499	29193	30868	58150	47656	66180	54479	26314	60982	51975	30773	31735	40753	40963	42113	27881	29431	21787	58794	34446	24348	16398	22206	30339	31956	28841	25039	53211	61144
PE(14:1(9Z)/14:0)	32965	41027	25246	15356	24965	32922	19684	11006	11594	9704	31487	47210	40728	32479	53384	53304	31563	26540	31266	4674	35629	18106	18315	13444	20000	24937	25286	55465	11577	40345	49101	39228	36625	35838	46499	8111	38269	48042	34090	26532	36420
Hydramethylnon	12803	5580	12478	6295	9206	15170	11220	7914	7991	11804	16305	23722	10407	23267	13192	14003	8821	10631	4911	9474	19820	12348	9412	9773	7899	13762	14468	10039	3813	24658	7777	12674	11440	8015	12699	6989	13043	12751	3883	15946	11580
C38 H77 N9	22620	18557	18902	22565	15159	20824	21443	19965	18667	20650	21851	21466	21186	18927	19449	20080	15112	22291	17869	18449	19206	12188	19655	19979	18549	17251	14471	18371	19967	20166	19706	16487	20946	18217	18201	22274	16644	18963	9885	17452	19443
> limit Esi+ 7.316999	15705	16688	17677	14821	17222	17341	17031	16388	16011	19360	15182	17867	15157	17310	15879	15639	13440	18832	15432	17388	16855	7352	19681	17848	16920	17280	13116	16883	18311	17666	12938	15634	14911	15043	17614	18937	16797	15491	18023	19673	17167
C20 H14 N12 O14	8602	7240	8251	10340	5186	10211	9874	9029	13414	7241	8581	8218	13513	5872	7993	11067	6239	9432	13051	11132	9971	10449	9300	11293	7760	6000	7717	14544	7479	12262	7912	7169	7374	11780	7839	11689	8544	10547	3105	8387	9763
> limit Esi+ 7.101 :138	9414	17737	5619	10771	21274	16346	9116	4995	15242	5421	8985	10451	22800	6157	12889	21512	10905	15316	19869	14530	10037	13815	13559	15880	4897	3295	5009	21082	10676	16013	10418	7526	12570	9927	10073	12129	9591	19663	18449	12398	8300
Deoxylimononic acid D-ring-lactone	45837	41798	22669	40551	48711	44059	40768	56798	42924	35556	48588	49725	39909	36318	39503	28413	39135	45777	34659	39887	42032	35039	50225	42559	21424	15193	9811	39144	38802	32072	43786	27308	35921	49464	33515	35701	33429	31782	22208	31043	39006
D-Urobilinogen Esi+ 5.4400015	67284	29015	29851	40439	50859	32393	49791	32940	45958	26224	29764	73284	80811	44520	30765	25359	21412	74895	51285	45569	29488	35091	63172	21490	50447	43318	30844	42137	38086	28364	23918	20004	42643	104114	33931	108324	21989	32678	68104	65694	68828
C37 H79 N4 O2	12516	5116	9686	13055	5276	14290	10350	8359	12819	7437	11352	11997	14690	11611	11715	11608	6449	13191	13937	10405	13124	15231	14911	9242	5045	9611	14054	14201	10397	14108	9676	8767	9685	4019	12676	6562	10153	12463	5131	10762	13893
5-Methoxytryptophan Esi+ 1.5309992	9664	5558	12593	12300	12384	12150	13593	10718	13628	6716	12572	15426	13310	4416	16803	11789	12415	18245	6943	13310	11465	12013	12665	9105	15502	16756	92731	10851	13802	11521	13376	12545	9889	12936	10879	13466	13664	10610	13194	8056	12410
PE(22:6(4Z,7Z,10Z,13Z,16Z,19Z)/22:2(13Z,16Z)) Esi+ 7.2039995	11920	23482	9184	12843	23075	12183	10519	11798	11634	26971	11120	11090	9305	12780	10704	9150	14059	11362	8465	10075	12946	8524	11567	11757	10667	9792	10619	9829	8649	11580	9244	10544	20112	21521	10765	11144	12808	9493	17118	11993	10492
3,4,3',4'-Tetrahydrospirilloxanthin	20825	16306	13100	14268	8776	20522	11704	10099	18055	14265	21719	20836	10168	21806	13736	10178	19635	16283	10821	11549	19578	15837	18333	12392	15671	13333	8678	9818	8512	18194	11059	15955	18743	15273	20913	23793	12786	12015	13393	19838	15465
Lycomarasmine B Esi+ 7.1759977	14280	10548	11445	14375	14172	10793	12837	9106	12911	13548	12075	11562	10518	12831	14023	13134	12633	10633	13854	11372	13083	13842	11756	10716	13347	14873	13084	11694	11679	11203	12842	14116	14100	8386	14143	13214	12322	12960	9687	11356	11594
> limit Esi+ 1.5719995	14196	12850	13018	11801	8474	9602	10337	12146	17484	9936	12570	11604	16483	9309	9675	15137	10870	15990	15863	17415	13389	11592	10209	13158	11446	12605	13057	13166	13448	10104	9760	13484	16544	12877	10851	9165	8267	13800	12936	13091	13192
Myriocin Esi+ 16.648006	63888	47926	48541	67840	34354	51013	51142	27617	59153	38079	59525	40885	44245	62943	39040	57463	59418	41796	37596	39794	32708	47767	60783	51326	61121	31176	50091	57265	49665	45823	41455	47044	53814	33668	58395	51924	39539	44223	59212	50112	49575
Zeaxanthin	9724	8001	6524	8606	10056	7413	9951	12636	7818	14711	9384	12018	4693	8941	6367	13755	10015	10498	8014	10721	12048	9196	5130	14722	10876	10015	13493	12082	8689	9214	4689	12691	9198	14182	10853	5449	9760	12000	16441	2116	12511
> limit Esi+ 6.600999	9788	16316	4156	4911	11526	3745	8965	10447	10738	11212	10608	5499	11838	10933	5169	5865	7199	10290	12906	11257	7531	5824	7628	11970	15805	7901	5367	7175	12447	14554	8452	16333	6255	9247	7249	9594	8507	14685	5729	15232	10231
Diadenosine pentaphosphate	32170	46541	42457	13265	45810	28894	44470	51039	34644	51746	49921	12226	29492	12768	47415	49464	46410	44326	27572	28290	50549	24908	43827	46803	47771	52795	50733	31493	10816	34474	48132	14168	40978	42518	11214	48896	32842	31592	38801	11142	11640
> limit Esi+ 1.3919994	33673	38636	29429	27888	37824	29557	30528	37758	35599	17925	34719	32563	38788	31054	33713	35437	33453	41020	30928	36288	33461	26670	30824	34738	47874	29359	30089	32306	21116	39668	18754	33669	36111	39175	32441	29849	34869	24478	44632	42577	29074
> limit Esi+ 7.283	17185	14385	13289	17685	14941	21361	16174	14670	7955	17482	19338	20889	16958	18960	10535	16550	19621	20384	12333	12647	15756	8146	20876	19903	15084	15332	16362	15867	17061	19367	17658	13122	12082	12413	12820	16027	18221	15300	6346	13414	1973
C40 H83 N3 O3 S	19721	12989	19287	20266	14330	24409	17305	13970	14217	18984	15129	19480	20555	20018	14591	16041	15884	13956	14003	18068	18353	7293	16430	20218	12611	12926	13897	16011	14727	21435	18558	17240	12854	15631	11462	15545	20527	19400	8162	20920	17518
> limit Esi+ 1.3320005	61200	30192	25400	45657	42448	42855	44602	27049	32348	40372	53053	46379	42609	35001	26745	54167	50279	61677	48934	49726	62020	53785	40384	51769	45024	40911	45033	46998	47356	36016	57605	36072	30621	33808	39041	44439	45614	41062	28316	52594	64330
C42 H79 N6	20856	12501	22333	20491	11724	19939	22688	13566	20326	20133	19091	19572	20146	16226	18806	21903	19466	20335	21106	22459	15623	11149	18872	17069	19449	14743	18284	21144	16408	19125	18917	16894	17135	21590	20013	21037	17232	18944	5116	15599	13050
<none> Esi+ 1.4319994	17429	4172	6066	9632	8071	11676	10855	3807	3353	7152	16585	11208	2993	6818	9061	16984	10040	20407	13875	5422	12612	13267	8573	6323	10204	9371	9113	5515	6724	2723	16441	7470	5587	3501	3704	9977	7320	6221	11486	13637	12715
> limit Esi+ 1.5535128	27653	45173	32815	28615	54309	39785	35999	35326	35574	33625	19779	37949	48816	25584	42082	49081	40514	54398	29487	36102	20717	33575	30835	40915	51897	57333	39624	22774	53774	45964	16816	39641	31941	38356	35888	34298	40048	34862	71114	41874	17826
C19 H35 N2 O2	177240	180965	167581	200688	2403	164145	154393	187313	168287	177607	175871	168725	161151	173697	165383	199565	167389	138143	156852	178800	176871	163190	166206	158166	210527	244114	176618	188322	205946	171340	191624	173290	190684	167681	197845	163487	148208	151879	108407	141430	165972
> limit Esi+ 7.3309965 :135	21258	15695	21682	22460	10918	27581	23168	18824	18628	20228	18361	21745	23402	23831	23045	20852	16875	20760	21712	21332	21570	10302	20558	17472	15398	15351	20477	20459	16249	23212	17223	19449	18595	17378	20738	20752	24278	23224	5867	19161	20692
C15 H4 N5 O12 Esi+ 6.953999	41305	15885	39588	38928	18696	31998	26360	21546	36291	32965	30873	34126	31781	34303	30278	36582	22321	21733	24360	34369	26301	38230	21591	26494	35649	26753	43172	26505	20054	30968	38755	48593	41402	26008	31083	26502	42227	41766	9564	42680	37053
C22 H44 N14 O8	12332	16486	8614	8730	10398	12490	11911	11334	11690	11233	14953	13969	14022	11308	10232	8418	5792	10251	16365	13092	12907	13077	10814	10355	10383	11597	9471	11386	12828	14362	15045	13233	7073	9186	11025	12806	11651	12946	5735	8563	10623
> limit Esi+ 1.3769997	25450	21974	22839	17547	31504	20832	20900	20054	23288	23657	24292	16908	19072	31981	24475	19184	30422	23444	18239	25282	20758	20637	26063	18314	25031	23066	20925	18842	24844	24578	23647	22059	23596	24849	22377	24781	22948	24870	20785	23551	22136
1,2-Dioctadecanoyl-3-(galactosyl-B-1-6-galactosyl-B-1)-glycerol	15341	5667	9357	11728	10532	14506	12020	3888	2804	3001	17720	11863	13077	7679	10248	14631	13693	15655	15040	7807	15261	14020	11653	9681	10436	11153	10527	7878	9882	8082	16683	9049	3249	4319	10115	7789	8957	8276	9454	13462	15647
> limit Esi+ 9.054996	16992	21080	13656	24090	24179	24436	26749	28300	27905	22524	13436	22282	21360	19899	24520	11460	9334	22559	14102	30702	18121	18000	21551	20005	13595	13971	21602	12577	22426	24055	23325	11164	17183	23279	15966	23535	23833	13965	23257	29239	19984
> limit Esi+ 7.279002	12296	8558	20170	14075	7542	13376	15866	13599	14089	12814	14966	19630	12906	12701	15006	18921	14248	12849	20436	15810	11804	8951	18467	14687	13188	9126	16478	23381	10089	14569	14194	14935	16907	6519	16682	11532	10625	14592	5683	15971	12148
> limit Esi+ 7.276	21137	16781	22271	22365	16032	20387	19940	17368	18527	19542	19789	21032	21247	20681	20951	20551	17660	23340	18559	18720	19806	11925	20031	22712	19511	19064	19766	18593	19172	20092	18003	19514	17821	17407	19401	21304	19361	18021	13453	21063	19267
Kaempferol 3-O-[6-(4-coumaroyl)-beta-D-glucosyl-(1-2)-beta-D-glucosyl-(1-2)-beta-D-glucoside]	24461	21206	22487	28758	16720	31205	24067	24521	24414	26544	25635	24171	26703	26475	21946	24810	29289	26838	19824	26520	24939	9367	26745	24030	21916	22318	24441	22547	21475	28054	22963	23511	21168	19482	24240	26406	26480	24900	8713	26564	24578
C23 H18 N O27	17886	18876	14268	16682	16017	14420	13906	16301	12937	15046	13908	14604	11953	13414	14404	10500	12327	13799	11012	13333	12269	11766	12350	12467	13163	12403	13069	12720	12650	11766	10419	13221	12558	9645	11887	12895	8654	9215	12829	12024	11364
PE(22:4(7Z,10Z,13Z,16Z)/P-18:1(11Z))	12809	28639	19898	27896	21135	16754	25794	24560	12384	30259	12621	16053	11818	26413	12923	11174	28240	13655	10298	13106	24848	25067	13560	11825	24297	13549	24684	8528	13140	11909	20796	25346	12188	10537	27533	13656	11483	11631	20977	22827	13444
C44 H59 O4 Esi+ 1.6479999	33670	29158	18401	8739	13559	21597	11521	20450	15271	11768	18278	21422	18779	29012	20482	24191	11645	15805	21099	16475	22461	23189	16004	37446	31863	18858	14456	38248	29382	32874	34499	19230	11944	22507	20823	18976	27720	40019	21376	17811	34280
C25 H20 N16 O9	6402	2321	4704	6864	150074	10308	5185	3646	9821	3129	6774	7176	13521	4754	7520	475118	2665	9605	10699	9380	6496	7957	580756	9654	3439	2309	3899	12148	7043	10371	6453	463385	7876	6046	7265	5035	7826	10650	76331	681118	6275
C23 H10 N6 O18	18081	31276	17833	18152	31821	14609	14660	16535	15279	15806	14872	14425	13567	15467	13092	9236	14457	11811	11761	13232	8989	13295	11885	13218	12828	25421	11807	12971	11838	11598	13091	12423	11830	13026	11682	11959	11169	11475	25908	11891	12400
Cephalostatin 1	11312	8355	11399	12161	9735	10712	11344	9942	11399	10223	10303	10115	10638	9845	11135	7235	10216	9445	12334	12030	10736	12752	9993	10350	10836	9716	10173	14212	8998	10468	10696	10671	10516	10979	10699	11372	8217	10828	5292	9720	10523
TG(20:4(5Z,8Z,11Z,14Z)/18:1(9Z)/22:5(7Z,10Z,13Z,16Z,19Z))[iso6]	14189	14686	14413	15143	13512	17192	13830	13212	15700	12677	15658	17866	15436	19222	18125	7961	15580	18711	9719	10486	15575	7223	16923	17820	12897	16522	15261	8607	16510	18222	14638	12498	10445	13235	8738	15577	19612	11904	10475	18805	14066
Atractyloside	12514	10647	14285	18320	12817	11300	13701	6120	15389	10713	8283	6937	13065	13222	11343	4343	12895	12115	10017	9915	5189	12369	14201	8288	14503	16159	13769	12604	12210	13040	10586	11934	12320	10487	5903	14306	13293	11171	13100	9943	11790
> limit Esi+ 7.334002 :134	24538	16950	26532	26581	16714	27467	27332	22706	23794	25879	24273	27529	26647	23797	22966	24762	28175	28709	19278	23610	21487	7473	26562	30298	23718	21821	20961	24561	20820	23408	23327	22215	20038	21620	26700	24589	26384	24152	13079	23900	25795
> limit Esi+ 1.2000005	54513	53357	52642	50741	50227	56950	47097	47495	53699	51293	54570	60107	45242	55913	51005	50946	53694	61256	54200	51318	53228	53516	54603	52909	48605	54848	61600	56206	49300	56192	56967	57472	47351	45566	49552	55047	51690	50415	34364	52592	55548
Nudicauline Esi+ 1.2089998	10877	12866	14084	12605	13704	14444	14382	13290	12625	13217	13346	15585	15967	16004	14246	12015	13119	14603	14755	13456	15449	15308	15356	11585	10889	14036	15578	14835	13002	12754	12088	13755	12284	14508	12485	15534	13381	14684	8197	12608	13569
> limit Esi+ 7.3309965 :133	20606	14256	19859	21356	12480	19869	18095	17396	18601	19775	19759	19191	21010	18170	17626	16883	20581	20727	12618	18231	17790	7077	19186	19280	17119	15506	18585	13214	17077	19848	16688	14459	13260	15691	16677	17889	18663	15918	7153	18143	17738
> limit Esi+ 1.2550001 :132	45793	41649	37422	39722	42387	45990	42325	39371	43234	24030	50915	36968	34216	33964	23850	20094	41084	51399	42269	37293	41580	45562	39615	23776	25505	19617	36729	40750	35784	37197	44107	35518	32639	30445	35405	29007	12447	24253	28073	24931	45858
> limit Esi+ 1.2239994	18000	4054	5632	6943	4725	3909	5495	3637	7835	2374	11825	5377	5197	5107	5467	5672	7040	6218	6904	6245	14274	3894	3849	6002	5481	7290	5717	6564	6721	6143	15291	5489	2618	4114	3216	5558	4971	5447	4073	5296	15668
> limit Esi+ 6.796001	14798	15004	13601	15142	13745	15744	14287	14740	15870	14709	14296	15696	14122	14938	14616	13247	16065	15243	13770	15418	13476	13739	14665	14251	14104	14717	14230	13363	13892	13641	13639	14038	11348	15468	13608	14724	15744	14549	14053	14298	14340
C23 H19 Cl3 N19 O2	185810	127660	199778	191759	116803	228060	187246	147569	229538	133881	184347	205034	273713	165465	206688	218824	118816	234422	258707	211848	181469	232124	219152	231829	134333	125360	169034	263621	195579	232409	184634	178410	208095	1810	192465	198168	208131	249974	18582	211500	179584
PE(24:1(15Z)/18:1(9Z))	37531	30347	29233	34814	26299	33053	32538	22392	30070	31631	33232	32555	30023	23461	22404	37057	28508	32208	32186	28088	39023	32780	18997	34636	32464	31453	26993	29841	28061	29166	38653	25375	28396	29412	20735	32180	30470	24286	25222	28639	35801
Leiocarposide	10043	8816	9735	3247	12202	11770	12620	11507	11425	11207	13137	9704	13196	9986	17972	12570	12253	14532	25336	10632	12758	25146	14331	12760	14923	11359	14519	20482	10661	13275	10835	14236	24520	13479	17786	16266	6118	15671	9838	10596	12156
> limit Esi+ 1.2540005	10188	13965	8806	18888	13941	11999	16131	24524	19111	17568	18316	12506	13436	11128	13102	22355	16136	12806	19645	23168	20223	19526	17680	9903	12887	7215	20636	9464	10594	13213	13559	9270	17528	13644	15732	18264	16199	20227	7636	17343	15689
> limit Esi+ 1.2050006 :131	29819	20697	19474	23225	21957	31418	18899	26565	24458	18706	25011	23619	20383	26644	18483	27924	27203	34402	20426	27381	30322	27729	14962	28231	22417	22351	25859	24351	23249	23167	28229	23234	24284	21389	24759	19657	24862	24176	15022	31622	26915
PE(18:1(11Z)/14:1(9Z)) Esi+ 6.9510016	16176	15153	17087	18253	14544	15706	15448	15615	16543	15359	17449	16622	16449	14928	16678	18485	13881	14963	19524	16687	16959	17149	15053	14182	14610	14877	15243	22543	14839	17372	14193	16574	16747	16453	16836	18770	15167	18514	8219	14193	16822
3,4-Dihydro-3-hydroxy-4-S-glutathionyl bromobenzene Esi+ 7.093998	1077070	924950	1098719	10737	856548	1189960	1048155	952617	1170028	912120	1062302	1090526	1245598	1006126	1104208	1134777	16610	1162039	1173535	1098773	1055413	13770	1132308	1163011	906742	904874	1029802	1196802	1098147	1143166	1056634	1009186	1085389	1027499	1053847	1052734	1077056	1177082	614901	1113075	1038204
C35 H53 N5 O4	10154	9321	13578	6937	9195	10389	5682	17102	8409	10262	14404	4824	8785	7158	6466	7883	8301	11387	5138	10113	17195	12000	6677	8407	2039	10837	7555	7615	8818	9342	20457	9848	5973	12418	10442	8908	11671	5321	3583	8518	17895
> limit Esi+ 1.5130004	6316	7301	15061	13586	15732	4723	15830	3713	3468	12359	8675	14443	12918	15794	8458	18495	17374	6982	4328	2490	6144	10234	13251	11194	4601	6466	15236	3554	15080	13469	7187	728	9284	2910	7800	13635	17949	8067	6640	13202	8038
C32 H27 N12 O3 S3	20430	11007	17801	21075	11462	17687	17334	15217	17027	14415	17785	18968	15690	17177	19040	15828	20015	19147	17252	20026	16772	7010	19783	17891	13770	12383	18444	16211	16636	19705	18945	16319	16130	16195	19961	15424	15987	18406	5951	17522	15933
Lactosylceramide (d18:1/25:0) Esi+ 6.77	10495	7066	8293	13202	7590	12281	12996	8616	13383	10170	11326	12925	8478	9891	11778	9026	10395	8692	13854	12999	9802	12838	12184	8560	6877	6423	10079	12408	9187	11303	11704	9104	12381	11889	11315	10148	11731	9944	4880	9595	11847
> limit Esi+ 1.3380004	24658	21553	21688	24645	21806	26081	26620	15152	21421	26324	22658	25037	13305	23398	21064	16531	25423	24223	22793	13880	20488	23651	16524	21091	21328	25212	15849	18948	20261	15433	20908	17692	17565	19049	24531	24932	22330	27122	14667	17650	22077
C37 H15 N15 O4	25746	23874	27652	20080	23961	26030	21526	23568	17112	14410	28070	25382	24784	30676	27314	26120	21883	27671	25339	18019	28580	24953	13197	33283	17755	22460	33536	25629	19149	28019	28635	31541	28815	21426	30292	23489	29655	25321	28770	31440	28670
DG(14:0/14:1(9Z)/0:0) Esi+ 1.5029993	10703	8535	11860	12669	12671	12022	11306	9177	8514	12992	13332	10991	10528	9140	15228	11349	13261	10781	8634	9466	8824	14374	10902	12372	9429	10741	9025	8398	5900	8823	14147	9161	10242	5807	10525	13991	11646	12157	7532	6610	9886
C30 H60 N17	28775	31605	32856	29171	36701	24813	15251	26849	30401	34866	28076	16172	16561	20283	19772	25731	31122	16556	26501	17664	32842	28995	17073	29696	26204	24738	20414	26035	13931	18283	30185	31662	26203	19636	31450	30052	31015	25744	23936	25415	12343
> limit Esi+ 7.1109962 :130	41312	5397	12646	36065	7748	43995	41027	31559	46284	7875	43261	39249	51312	6912	42844	50618	6253	44797	54496	10800	44151	12047	44707	41393	13689	9198	9096	17179	43416	42677	8636	12365	11654	11332	10583	46436	38641	10043	6561	38745	40868
PE(16:1(9Z)/18:0)	19095	5760	10457	12756	8601	20003	9938	11178	9923	13579	15757	12769	8134	20907	11136	8157	14845	10697	6974	9725	10911	10178	14660	10008	10353	15463	8899	6353	9009	10893	11808	16819	16475	11989	8416	10162	13324	8641	3231	11293	15282
D-Urobilinogen Esi+ 5.4409986	66208	29015	30970	40439	50624	32393	49791	30306	45958	27946	30803	73232	81402	44200	30765	26621	51117	76147	51285	45569	29488	35091	62752	22645	90577	42474	69740	42137	38991	28364	24541	20365	42643	104382	33931	101536	21803	32375	67262	65628	69081
<none> Esi+ 6.9700003	13368	10623	12777	13806	9964	9283	6790	10367	8724	8078	7159	8731	12355	11300	12133	18156	10126	9379	7470	8985	7846	13416	10777	10572	8088	10006	13178	13821	8038	14538	10098	11837	12905	11823	10331	11008	11870	11805	5376	13925	9677
<none> Esi+ 7.1080008	8110	6435	10943	9564	3408	14521	8838	6039	10223	4314	10329	9451	21431	5768	9477	13450	4053	13585	17773	9825	9605	12869	10822	12604	4851	4231	7374	14992	10034	11087	9795	6510	12383	9028	9311	8381	10452	12161	1820	11664	8742
Glyburide	18589	12458	15526	21179	9268	16522	15124	15423	14250	17182	17477	16987	15018	10519	13746	18157	14896	17489	14268	17394	15354	16181	16881	14433	12577	12708	13528	17383	10054	11934	15787	13107	12425	16508	13104	15861	14062	16487	6219	13685	13909
> limit Esi+ 7.3009977	17548	13263	18268	17844	11557	18614	18864	14854	16920	17709	16861	20852	18224	19814	17998	19433	19302	21064	13776	14922	18690	7254	23109	18105	18282	14549	16640	16069	16510	13708	17874	15348	15326	14637	15686	14601	18538	15511	8551	19624	18669
> limit Esi+ 1.2210004 :129	26149	23602	22338	20633	25147	26068	23759	24341	22683	24776	21437	5273	20437	16876	16190	19274	26524	26559	20063	15061	25188	21637	31102	20674	13624	19217	23607	25915	23263	12803	24894	19296	19627	18209	15039	25382	20576	15584	16149	15958	30818
C34 H62 N17 O2	31796	32736	12690	32285	31273	15557	13254	32879	11828	38799	15105	31813	13800	18355	16979	13053	32833	13751	9626	28494	14043	26629	16744	13381	31651	30348	29515	12117	14359	13709	34986	14566	15804	14254	13511	14244	15162	27013	20525	13688	25114
> limit Esi+ 1.5149996	27176	43463	29816	25863	25164	28947	27353	37657	38067	36081	38469	21156	39239	26994	25458	32401	32204	41251	46323	40545	30642	28327	23313	36032	35059	25550	26758	32579	47808	48512	28913	41629	35416	42095	38679	30679	38707	29625	51045	59828	33533
C17 H12 N12 O8	17542	15134	14670	14344	14989	11144	14568	14402	13741	11538	10837	13634	14038	11863	12449	15157	10230	11770	16762	13776	15456	16215	12038	9520	13587	10503	14842	16538	12242	14024	14756	15459	13628	14925	15547	10931	13302	16786	11724	13773	16223
Taurodeoxycholate	31378	24588	35303	39284	11794	28768	51892	34866	119376	34775	32607	37981	28453	34318	76664	22357	60111	26798	42514	49253	29251	86115	30108	39904	50445	45649	35784	41205	34689	26354	26974	13948	55940	43336	45422	41615	18445	22806	40233	23759	25449
> limit Esi+ 7.101 :128	11426	6406	12967	13284	5369	14169	11248	9098	15353	7747	11552	13554	15193	9398	13337	10802	7824	13098	15958	14998	12252	16036	14786	13258	6581	7403	11817	15978	12266	13676	12171	12988	14178	10417	11611	13123	12300	16672	2037	13531	12287
C21 H5 N6 O19	14138	1608	4186	9039	5602	9334	5868	2574	3416	6116	14572	7588	3411	4494	5947	15581	9678	16928	10033	4628	14663	12184	8108	5766	7622	8082	8555	4705	3872	3379	14228	6589	3664	2767	3270	6682	6975	4461	6935	10874	13416
DG(20:2(11Z,14Z)/18:2(9Z,12Z)/0:0)	22884	25779	24248	16225	28261	17093	33028	22265	25441	29448	26615	26703	32567	21065	22140	20188	29711	30479	20385	32421	23439	22461	27882	24914	21953	34093	20420	31839	30648	18893	30238	21514	28598	21077	25492	22017	26164	27358	27339	20409	26529
> limit Esi+ 1.6259997	9557	9843	7903	8561	8467	7741	6813	7216	9746	9415	11002	5625	4222	6457	7882	18725	5070	3033	13591	9032	7781	16368	3374	8889	8712	7356	6662	17131	4626	6675	9150	12226	8570	4113	13515	9504	7419	13393	8930	2462	7565
9-Chloro-11beta,17beta-dihydroxy-17-methylandrost-4-en-3-one	9794	5346	11286	14295	8064	17127	7387	4201	9656	13707	9697	16077	9564	14322	11749	9594	11309	11744	7762	8961	10035	10276	17165	9519	6520	7229	9245	7014	10578	11973	10038	8238	11187	4545	9120	10121	14480	10241	2620	11268	9568
N?-Acetyl-L-arginine Esi+ 7.3200045	42461	28081	48857	48789	18574	4368	74571	29484	47540	69670	45749	32314	19724	15301	23558	54445	45386	23004	74047	79637	33269	125050	28068	15602	29735	17785	17444	100467	14869	17918	32722	44580	60914	59793	41478	64417	12219	33566	20232	17504	33984
<none> Esi+ 7.3370028	10457	7642	12680	14845	6775	12206	13277	10015	12225	14213	11881	9924	14938	9139	12749	11538	11823	15566	11378	15594	11725	5897	12076	10068	11209	8804	9425	12585	9418	11285	11383	10614	11756	12835	13922	16695	13771	14427	3633	11265	12019
> limit Esi+ 7.095998 :126	14063	8157	15438	13430	4866	19128	14031	7015	21409	6783	15037	10852	21821	13603	14364	13537	6642	15956	22262	15193	12693	19213	18264	15357	7718	5830	10071	23151	14982	16638	13029	11712	12289	12648	12858	11622	13765	18161	3351	18778	12567
C22 H3 N O21 S2	10116	10188	10440	16094	11335	10832	11385	8016	16313	13023	10845	15605	9873	9600	12292	11335	11029	9762	15799	14048	9663	15966	12352	10329	11424	7676	9817	15715	10509	11804	10182	12835	10221	9870	13577	14195	14435	13529	3990	11676	10304
N-Acetyl-leu-leu-leu-leu-leu-tyr-amide	13451	11772	13340	12071	10988	12833	12223	11860	13198	12061	13321	12929	13224	11941	12386	13323	9387	12514	14757	11754	13946	15675	12457	12335	12051	12357	8329	18768	9509	12471	12763	12607	14712	13562	13137	12048	13131	14097	10062	11397	13419
> limit Esi+ 7.309001 :125	30030	18602	32853	27969	16457	32935	30393	23245	24877	30280	28112	34317	30222	30737	31105	33599	27666	33291	33308	25061	31350	22358	31901	28973	36092	26833	24697	35526	23103	34721	32177	32960	30448	27214	33698	28711	30476	34986	10225	28479	28376
> limit Esi+ 1.2470006	35088	30496	21111	26871	22671	21648	15921	30764	15763	24096	32205	30627	14117	16203	19198	19824	18451	34981	28326	23835	24577	24118	27945	22039	19626	28934	8596	13259	15771	18774	25869	25577	15178	27782	15128	18931	25983	28586	17906	27942	31507
> limit Esi+ 7.1040025 :124	5160	5740	10897	15382	25449	19095	14019	23997	22856	24312	11411	12449	23325	5548	13838	13571	25637	18334	20124	14735	9563	14609	15784	18875	5690	4791	3762	23740	13526	17460	9180	10735	17458	11000	8988	14109	11086	18225	24268	12094	10458
C29 H49 N18 O	28281	16235	15753	22120	15523	24481	24208	31730	25096	21007	27185	15696	13817	20004	13311	17198	18666	16918	12772	15626	31862	14225	15530	14439	16971	24093	17329	24387	32518	13475	35079	25445	15143	12597	13982	15769	14495	17617	16456	14434	31934
C23 H49 N7 O2	8763	7965	17353	11212	12583	13170	11954	7373	12373	12307	12238	13261	7447	14811	13811	7587	8996	6429	5613	7361	11825	11410	17283	7797	5547	15000	14883	8350	6724	7344	6840	8274	14507	10014	11559	18829	13588	11164	13154	6944	11031
> limit Esi+ 7.333004 :122	25771	16939	28692	31254	14724	30748	29171	24090	25151	26555	24641	28610	27877	24485	26577	24660	27664	28046	22086	24067	25025	13672	25685	23430	25072	21899	26123	23035	24030	28331	24211	19808	20349	22157	23401	28545	26097	23490	7766	27485	25021
C28 H3 N2 O16	14389	2237	6755	13890	7582	12632	10998	4459	4280	9153	20807	11168	5027	7149	10201	20584	12646	22424	14115	6633	19493	15895	9074	8552	12039	12471	13091	6409	5827	4421	19833	7987	4460	3441	3723	10100	7606	5066	10587	14677	18108
> limit Esi+ 1.2050006 :121	21217	14041	17688	19936	21174	24348	16173	24229	18309	17071	21730	23864	16097	21882	16678	26141	23274	24574	19888	23697	24945	23272	16369	25354	23852	20925	34690	21518	19549	21976	26156	20840	21303	20738	20231	17183	21075	21867	12351	25811	24084
C31 H31 N O	8247	2441	12219	7521	7857	10191	5990	1767	6821	8766	6291	9277	12907	6835	10507	8697	4128	10521	10339	6173	9244	11877	8624	4048	4932	11742	13333	3929	9080	7696	6748	7758	15425	2306	12389	5234	8390	3770	2050	3618	7072
PE(22:5(4Z,7Z,10Z,13Z,16Z)/20:3(8Z,11Z,14Z))	26915	12401	39136	35843	18469	25487	17269	20308	13878	28234	30790	16507	20730	10684	16666	39949	17447	15152	34996	25302	19784	43723	12645	19267	32278	25374	34336	27120	21108	22761	31954	35831	30833	20611	32754	19201	16666	35394	3660	16804	23181
> limit Esi+ 7.333004	20338	14730	20665	21696	9440	20055	19859	16907	18976	20813	19409	19000	20170	14934	18895	18735	19923	20620	14492	18718	15293	8757	17402	18236	15211	12656	17111	16664	16858	16597	18517	16385	14088	18033	16834	19599	18491	20670	5453	18629	17747
<none> Esi+ 6.796001	18314	18598	19452	18655	16771	19489	18068	18118	16704	17210	14963	14536	14448	13137	13056	11201	14566	13063	7319	13493	9815	12138	10434	11940	9757	10334	11072	11133	12534	8957	11978	10642	8110	12121	11510	13209	11809	10308	9787	10244	11943
C45 H43 N2	34256	26952	34102	31454	28373	33846	31138	32173	41713	27489	35785	31924	37440	35772	44834	41106	31928	36427	39522	40993	34327	36010	40588	37178	30903	29783	28957	39029	38625	36602	36767	36066	34012	41702	32731	36210	32054	41598	24144	40921	34056
<none> Esi+ 7.101 :120	10165	7393	10542	11936	3707	16743	12037	8311	15098	7806	11805	11413	20173	7781	11449	13328	6894	14223	15117	13653	9955	14620	11520	15015	5391	6032	9912	18366	12308	14176	10254	10800	12597	11632	9090	11181	9899	16464	3018	12183	10685
> limit Esi+ 1.2019998	17301	16840	17514	17121	12431	16923	17850	17757	16664	17957	21753	19333	17910	19373	16046	20851	16419	15155	12469	21837	19619	18436	17080	19113	14752	20854	19520	17920	17704	18832	15327	17021	15289	15500	15239	16510	20269	15962	13045	18990	18502
<none> Esi+ 7.3299994	29433	19901	31180	30746	15953	37368	30507	23935	27443	28994	27715	33826	29855	27927	29227	32229	24959	32622	25103	27037	30501	15422	30016	28312	26234	25767	27654	27994	26104	29499	24153	25512	24253	23676	27049	28159	27648	29676	6590	26893	27895
Medicarpin 3-O-glucoside-6'-malonate	13437	6466	15499	16937	4591	22846	14206	10924	11996	13798	14600	19455	16849	15013	15091	16558	13692	14886	15560	12449	13627	11800	18034	18363	15087	10622	14301	15250	12403	18744	13452	14981	14337	9153	14001	14007	18993	16608	2242	19791	14415
> limit Esi+ 7.3450003	15914	16047	22299	9198	11101	15480	1650	13657	15446	16485	17744	17406	14180	14375	14950	20789	17017	17470	34182	14587	19679	8139	17757	17944	14340	15620	18796	38834	16472	15089	14678	13461	23820	15433	14385	6697	4323	27284	12069	10284	8824
C35 H13 N13 O8	12281	15857	5103	2297	11205	9821	7304	13675	19759	13029	11540	5481	13863	12540	15355	4611	5923	9051	5034	15166	12420	3699	10828	130446	14862	10937	6791	5286	18570	129226	11995	7619	119808	19368	8274	5910	5365	4981	14643	108185	12972
C30 H17 N12 O6	14583	6767	15739	7378	1703	13366	10661	9429	11247	11430	13448	13355	11833	10562	14421	17260	13653	11379	19605	8411	12758	10285	11806	9872	15048	6951	12307	20236	10039	12428	8924	14037	18234	12228	14922	8801	4975	16435	2274	6982	14002
PE(15:0/20:1(11Z))	10838	23796	21937	15423	23361	16861	9251	21890	26783	8516	25810	10650	28451	18313	13112	18074	9050	21038	19304	17747	18284	23674	13591	23849	20423	12386	21265	28954	23768	17275	28611	26961	8265	25557	9288	10940	15453	32519	8054	20772	23263
> limit Esi+ 1.6300002	5576	8465	8364	11909	13786	10958	8449	8363	15808	8534	9785	6212	10260	3752	9277	16463	5992	2062	16499	8726	9168	15347	3832	3219	9366	9295	9357	15260	4714	8092	10133	10985	9413	8708	13051	7239	7903	12785	6291	5381	12836
C19 H44 Cl3 N6 O17 S	14613	10461	12928	18103	5136	21138	13362	13599	13391	11589	12391	14317	16846	13033	11606	15766	11009	11406	11219	10004	8896	8829	11169	13384	12920	10521	10410	9741	13480	16476	14910	11438	9820	7731	8970	10127	15559	11681	1221	14518	14800
> limit Esi+ 7.291996 :119	20823	18605	19232	23791	11673	24014	23511	20356	19906	18946	22736	24845	25483	16849	20964	25610	17768	21928	20009	20877	18170	17535	22899	16327	21108	14375	21441	22146	19189	22466	22100	20287	18256	16603	19568	16799	23864	19045	6191	22627	23070
Glucosylceramide (d18:1/26:0)	16807	18530	9253	13083	10095	10699	15163	25750	18971	7417	15473	13254	15518	11832	13575	26439	4772	10363	14296	17086	13339	9527	9914	8548	10947	6082	18333	14650	11494	13143	11960	6876	20519	15628	10708	9127	20732	13548	8183	14171	18572
> limit Esi+ 7.035002	24649	24917	20777	27456	21910	24259	20130	22433	23050	19760	22535	17868	24125	19431	22733	26229	23924	20016	20493	18364	23093	26448	17939	17605	19965	23743	20987	22915	23325	25679	23547	20300	20606	19923	25979	23247	22725	21421	15755	25550	23532
> limit Esi+ 1.2050006 :118	29937	26494	21324	29171	18691	18923	19016	20723	16239	25153	19253	17451	17419	17135	22412	19365	24832	28975	18968	17241	28535	19725	19906	28280	16820	27637	18289	21592	17983	21442	23340	20037	18396	14273	15253	18271	31923	16122	14777	17033	21431
<none> Esi+ 7.095998 :117	17186	12149	15413	14138	8586	18482	16544	10989	15610	11751	12468	13659	15071	14143	20733	16122	11410	16428	17194	16693	13063	14636	20627	17524	11856	10530	16701	22252	14735	13631	13141	12374	15721	13020	15644	12293	13116	17430	7517	13605	15961
C21 H50 Cl N10	5602	9539	15251	15156	13080	8433	15312	6593	14398	15897	10589	2089	7295	13612	13621	12516	11312	13241	19602	10929	11632	16372	10682	3163	6166	10745	7883	16816	12163	3630	1967	14645	13527	3518	6756	11349	10924	6292	10471	5325	10870
PE(20:0/24:0)	18080	16563	17967	20148	15362	19957	17030	18610	19511	21076	17850	14608	20187	18586	17875	16005	20332	21957	13003	17920	18331	7878	18314	20330	17165	20014	18138	14253	19997	19817	17100	14879	12501	15427	17887	16619	19330	15385	12887	18157	16037
C41 H85 N3 O6	14535	11028	15926	20201	12277	19732	12672	14036	13333	14469	16294	15482	19265	12512	16421	17081	16611	18846	13293	18979	14929	5285	12506	14409	9947	12565	13290	13490	16533	12560	13346	12848	14634	16334	17457	21808	13192	15352	7164	12612	13445
Terminalin	20279	22528	20000	18653	21324	18689	17506	18487	17865	18603	20788	19296	18657	20181	18635	17788	17420	16238	14701	16062	18220	15840	15572	16797	19159	18744	17753	15525	17046	15030	18099	15565	17106	18693	15612	17263	15437	13455	15162	16834	16851
<none> Esi+ 6.793	16514	15470	16523	15710	13991	13474	13098	14916	19990	12474	14667	11170	13517	10145	14158	18897	11709	11497	21411	14938	14120	15292	10951	10051	15000	13500	11908	21045	11745	9652	14435	16015	15635	17734	14420	11084	9359	13811	10220	10557	14863
C23 H55 N26 O2	9757	11652	12414	14147	7088	12767	14272	12417	12857	12930	13664	12564	13949	12450	13744	15478	11967	12550	14014	13733	14425	15167	13803	12423	13001	12007	11870	18277	11198	13089	13500	9356	12468	15351	13356	14524	11963	13593	6534	12471	13403
C24 H21 N13 O10	11933	4122	21612	15798	6093	21214	8908	3735	16788	9637	15601	16612	20446	13126	20357	15779	7824	17907	15289	8618	11909	25888	18046	11490	5808	17065	21431	12522	12320	16686	12902	18389	43472	19410	41719	11727	19565	13917	8957	12939	11278
C23 H40 N12	29040	32617	32193	33391	19522	33131	33356	32570	31140	31211	36107	25097	30687	34886	27366	34333	30863	34740	46705	31714	34509	36046	34706	35892	45175	35355	35331	49329	34284	32163	54572	29695	34000	32148	32148	34497	34976	36278	21605	32277	34947
Yellow OB	4379	9134	7452	15345	7584	15372	10907	11126	3618	11623	6677	7067	7726	8386	3718	7520	6342	6884	7221	2835	9202	9651	6732	10271	10834	16307	5567	3721	6606	17266	9864	14426	9426	9576	9648	14312	9061	12697	6965	8588	6260
> limit Esi+ 5.1289988	15491	10032	11238	18358	9875	15550	25688	14378	24527	14080	16238	17739	22202	11923	20688	15034	9226	17078	28318	26441	18368	18384	18256	11369	11478	5576	11316	26911	10582	12060	19503	13890	17607	27789	16574	22566	11415	17664	981	10773	17854
Rottlerin	22181	8860	17244	16899	11027	33401	15379	14554	15418	15150	27726	27388	16654	16890	17267	17710	10062	15179	14832	20194	27925	14452	14720	21357	10484	12178	17837	11691	13702	31031	15094	24407	14674	9862	16252	15780	16926	24709	4627	21497	24800
MK826 Esi+ 7.105	7570	6230	9538	8835	3765	16127	7561	6892	14527	3929	8050	10506	18130	6311	9279	11394	3489	11004	15856	10354	8311	13240	12454	12133	4360	5762	6516	18535	8515	13856	7101	4021	8492	7963	9877	8095	10188	13796	1312	11893	8148
C33 H71 N10 O	13955	3827	15669	15559	7310	17506	12297	6382	12985	7985	14672	15974	20879	12353	18047	15247	8069	14776	14621	13080	12343	18971	15320	15457	8638	9597	24642	17620	14465	16831	14086	13743	17916	7792	16861	14223	17501	13519	5684	15797	13293
Tetraneurin A Esi+ 6.483998	10057	6621	4052	10422	4392	7660	10424	8776	10181	7070	8529	8433	15384	8413	9457	10883	6934	7864	8437	12564	10830	8825	9754	11339	9154	5142	5047	18066	10273	13324	9672	11951	7689	14264	5494	19134	6614	12503	2029	11174	12379
Norbinaltorphimine	45199	42348	43980	55067	38501	34682	58171	33313	49516	59783	37727	31565	60176	24481	43135	49535	41322	38690	69607	40740	42455	55718	36144	38293	40110	45062	46482	68656	44114	46738	40614	44108	52640	43767	47674	47223	28367	49142	36139	34661	46379
> limit Esi+ 1.3720006	21966	7311	7238	13474	11098	13922	14016	6843	6160	14869	22564	15139	5745	6233	14477	23355	18515	24908	16465	10186	21956	17859	14475	9884	13750	13834	13628	7978	10420	4904	23691	9912	5121	7959	7044	15175	11552	9923	14670	19758	21484
Ivermectin B1a	38719	62740	57213	51911	35361	48874	40071	60784	32477	59102	39158	33282	24344	33797	59033	53127	48288	10861	49980	57824	57267	64201	20449	28294	42709	40789	50365	65759	41914	37348	58607	40155	51979	53079	58877	43797	38748	43188	42839	31294	47104
<none> Esi+ 1.4580001	23382	111731	145046	32928	115403	36150	40350	17756	18588	111859	35279	32257	22775	55209	31878	199636	59316	164191	17380	24342	99406	39254	42859	148816	170443	202339	171693	12893	32781	34427	28803	23208	39420	128751	156810	185683	160230	42788	67096	27904	17999
C27 H11 N10 O17	17620	3829	7490	13163	8106	12647	10586	5414	2649	8347	17517	10245	5057	6403	11680	17407	11498	19808	14556	7177	18468	13954	6393	10923	11116	11838	10411	7284	6087	5554	19230	9666	4346	2723	5145	8414	9536	7558	8227	13604	17210
PE(24:0/22:6(4Z,7Z,10Z,13Z,16Z,19Z))	23485	6552	12813	17209	15391	17134	12267	9073	8645	12326	24115	14625	8077	11045	14187	21444	16118	24433	17260	9026	18862	19614	10935	11160	14521	17659	13401	8418	10022	10788	20490	14224	7822	6202	10951	13713	12300	10600	14854	18958	21303
Chivosazole B	17553	15263	18483	18258	15061	16458	16989	16436	16316	12362	17361	15951	17020	15722	16685	18030	16119	13740	19551	19202	16900	19044	14689	14977	15375	13563	16724	23149	14396	15128	18219	17434	19318	17545	16888	17932	16540	17556	8450	14370	17156
P1,P4-Bis(5'-adenosyl) tetraphosphate (AppppA)	62062	64484	60470	64258	61359	45672	42753	62221	59238	15679	14983	56495	40897	66969	39857	19287	61772	34487	32992	58131	60830	49023	52518	38208	13101	14182	66038	43167	57876	63654	66333	66288	61444	61876	64340	22391	47932	17516	52981	15598	41724
> limit Esi+ 7.1779985 :115	8692	16459	9658	10151	16124	6931	9681	12973	7867	13240	10102	7845	6767	9216	8356	8642	11925	7176	6513	9235	11126	6929	8496	8341	15479	13374	11958	6134	9755	7857	10880	12367	8812	11912	9738	9023	10009	8789	112060	9091	11517
C35 H14 N5 O7 Esi+ 7.2799997	32483	28085	24906	31373	30167	32746	29781	28170	23820	30908	33222	28530	30229	31007	23116	23714	29716	26844	20282	30082	29097	20975	27767	29378	26310	26008	27281	22745	30618	23312	27285	22544	23286	29753	23933	25425	20992	27754	23632	29607	21958
Glucosylceramide (d18:1/16:0) Esi+ 1.2249995	43473	48314	18363	43663	23400	38185	33420	33072	35370	24602	42188	45251	33804	27819	26148	26982	38990	47516	12959	44858	50236	31377	26907	37556	26922	32107	35560	58210	40243	26475	44198	23905	33060	26352	34917	27656	21736	17218	21111	15089	45747
ADP-D-ribose Esi+ 7.9620028	20675	17931	22151	18138	15755	23568	20279	20257	23972	16764	21493	22094	22319	18610	21842	22691	13061	11930	31923	23246	22400	23193	23424	13920	19986	10940	21642	34740	17953	16475	21718	23007	26716	24130	25718	19416	22406	24625	9509	18897	22453
> limit Esi+ 7.1080008	6843	4051	11203	8700	2839	17742	7896	5917	19578	5650	44561	13946	22814	8209	10553	14830	38003	12496	19930	15682	11524	12250	16580	10973	5207	36743	9686	20325	12599	14874	9187	10801	12691	9806	13525	11680	10781	15021	20521	16669	40996
C35 H63 N6 O4	7172	3940	17069	22185	9632	19843	7681	10787	15235	21473	22664	16071	12710	18899	18121	22359	15588	13454	16975	9404	12125	11143	12632	17233	10842	15654	12495	11216	13198	19360	13351	17079	11295	10977	10049	18967	6130	13220	18607	21388	16495
Phenylacetylglycine dimethylamide	11261	5291	10687	17593	4104	11701	15850	9529	7633	13254	13193	11015	10947	13596	11110	6511	16496	14560	5151	12808	10975	2277	8154	15861	8335	9074	7105	12224	2334	12702	9945	14602	6962	4833	12456	10486	5220	2475	4886	5090	12379
N2'-Acetylgentamicin C1a Esi+ 5.447002 :114	19264	23106	2899	8513	5865	21149	15289	13037	20747	9142	15463	26048	21443	4884	9171	4227	3560	26004	9041	19841	8470	5931	21695	6573	5266	2760	3791	6733	7108	1192	5971	3571	3157	37489	6238	13480	8716	2795	7727	4500	21381
C20 H2 O18 S2	23088	26061	15926	17738	24510	18547	18618	22370	22014	20171	19967	17073	17997	19191	17536	17168	19442	19164	21192	19258	19844	16402	15840	19482	19890	20725	19563	20399	20458	14952	15899	18685	17468	19991	16976	13507	17685	16872	28375	9402	17473
C29 H15 N12 O9	15753	11390	23852	19035	13832	22863	18878	12776	20080	21037	18330	21266	23293	19542	25416	19563	16015	22154	20449	19584	20890	23560	21052	15573	12296	17203	20982	23961	16608	17158	17768	20174	22952	13239	25140	18946	21201	18106	7375	9757	19327
<none> Esi+ 7.093998	11746	7181	10495	12166	4347	14909	14229	9099	16058	5720	11540	12502	20697	9445	13620	13634	6183	14836	17398	15105	11573	13592	13668	18880	7529	5368	8638	19042	14133	16186	11841	10067	12959	13185	10303	11892	13241	17339	2680	11315	12807
C38 H80 N8 Esi+ 1.2669994	26613	31557	19847	37863	27379	27111	29925	239661	24980	26535	40109	24656	26678	54294	27815	134610	20889	28300	16585	55476	36396	15841	22388	17110	15010	3499	61155	25671	23800	15829	37559	10106	52740	9850	13542	25275	115997	33986	21122	32940	31886
C14 H18 N5 O15	15820	20843	17028	8104	21485	8504	15666	15317	29138	8187	19813	6257	25394	8849	21367	16167	7532	10628	25229	22453	22228	17340	13559	3604	15021	13646	13944	30328	20470	3287	21238	22276	21615	37596	21865	11975	8942	19551	13542	956	22297
p-Coumaroyl-CoA	13763	4956	11286	12043	2652	16706	10131	7903	15414	4988	8123	12211	18866	9411	13959	13287	4527	14277	17946	12218	10645	13322	13453	15313	5503	4042	6775	21189	13141	13628	10321	9442	13513	10626	11348	11210	11734	16593	770	12964	9723
DG(22:0/18:4(6Z,9Z,12Z,15Z)/0:0)	11706	7951	12312	12571	6915	18840	14407	9447	18616	8884	12700	13490	22363	10032	15849	14685	7219	17771	20758	12654	12987	17776	17030	15882	7732	7858	12139	21926	15619	16824	14075	13559	14708	12718	12850	13936	15650	18860	2269	15011	13636
11-amino-undecanoic acid Esi+ 5.768002	30132	26596	30072	33462	32471	33112	11062	25365	30725	30481	26474	27827	25619	29202	31372	31543	32146	31991	47316	30100	30715	29812	34697	31117	32483	31377	30094	31205	30232	12137	30227	38679	27938	29343	27560	31737	33073	29972	156395	31013	29073
> limit Esi+ 1.2579997	84756	83941	72477	75243	109440	87054	79445	53640	123700	67795	90106	84432	93809	68633	69653	75918	73245	89536	82004	68459	84572	80241	73547	106110	66392	72183	89160	79838	84304	84830	78732	98210	73640	78162	83714	85072	80681	101547	52766	90401	88650
PE(24:1(15Z)/20:4(8Z,11Z,14Z,17Z))	5869	1991	6052	8734	785	13454	7678	3660	15480	3929	7771	8481	18237	6948	9648	11413	2792	14502	14724	12293	6779	12847	11921	14963	2870	1499	5660	19530	9399	13854	8436	6937	8436	10089	6585	6912	9671	16765	8716	11047	5601
<none> Esi+ 7.328002	20970	21539	22921	23399	18269	24539	21291	20200	19208	22376	21149	19989	21330	20384	20485	20452	22754	23719	16476	21464	20312	15136	19699	24165	18857	20177	19802	17271	20110	21860	21420	17203	17937	18261	20995	22646	21267	18680	12677	22184	20775
> limit Esi+ 7.101 :113	10016	5350	6778	9728	8211	18863	10956	2307	16704	1357	8105	10613	24155	7391	8871	14340	3629	13278	22659	14188	3815	14006	8544	17762	4726	4435	5929	20099	10455	11995	8135	10371	13837	13626	5093	15773	13942	17903	5134	14107	12006
<none> Esi+ 7.2940035 :112	19789	11947	21370	22397	6635	22458	16977	15162	15498	16811	18886	23767	17145	19854	17066	13672	17969	15388	11594	12109	16020	7025	16180	17681	17793	12988	14891	11475	12823	17867	16511	15260	12067	9680	7254	5719	17643	15366	1385	18734	13440
2-Protocatechoylphloroglucinolcarboxylate	18849	45529	47631	37852	43646	15519	13988	42271	27926	41049	16438	16718	31288	20185	15737	15323	45606	41001	12195	31866	32879	14252	19282	48747	22589	59202	20361	13236	19820	17712	52380	19166	18856	16816	11022	7982	19897	15890	41184	15381	21347
> limit Esi+ 1.2910002	34260	39753	29583	47056	32716	37964	24340	9953	31787	42881	34342	42537	50475	35468	41228	40775	47446	45411	35849	41779	37696	33474	48319	38026	34164	36471	26484	30727	35421	40390	28489	31303	36554	30942	33350	29609	27844	39414	27106	33262	33236
2-(4-Ethoxyphenyl)-5,6,7,8-tetramethoxy-4H-1-benzopyran-4-one Esi+ 8.407998 :111	170409	157054	171121	101766	139940	87769	156759	73806	246330	84048	151250	75232	243733	81649	224427	71360	46939	40017	229554	170778	122142	137333	116836	17045	91375	59110	65527	308931	83527	15560	129221	140902	140462	165480	112519	99204	62621	148168	31799	3760	115368
> limit Esi+ 1.396	44036	55336	19509	55574	61053	64951	68010	50366	60364	36812	66935	58922	53577	51816	14009	63746	59161	70237	53427	54184	70339	59937	46370	64415	56594	54542	59606	44840	45002	50789	73832	56269	37903	22785	49604	58510	51476	53496	47134	64423	19724
DG(14:0/14:0/0:0) Esi+ 1.4300002	210770	25772	11842	14724	22407	27590	222749	31633	369081	11550	31977	17264	51286	195234	38209	20643	7204	40843	30862	253081	209025	174898	251466	175179	26447	23157	19394	39602	41221	35415	28154	25475	21130	310733	23470	19157	155800	30195	236495	26891	17451
C23 H22 N9 O18	57312	33788	74754	17847	29242	7592	60839	21386	22887	29599	18684	19626	21168	20282	20646	19157	19668	20603	7306	20909	23281	1929	7556	104024	34446	36792	16057	8048	20192	96906	15821	16765	7512	23532	12989	8706	16365	15175	31687	14289	19716
Galabiosylceramide (d18:1/9Z-18:1)	47944	55842	32028	56566	57354	34998	53378	32797	56388	54434	59441	52077	29796	43885	48969	46929	54909	43310	51632	57312	34846	45009	52246	58456	49034	62493	47747	45377	42111	38262	57278	56687	49112	50460	47583	56964	47793	38079	36793	33804	60063
> limit Esi+ 1.2840003	14729	20098	20060	20666	19699	20051	19580	15445	23647	22773	10427	15423	21878	12931	19410	12081	23504	14982	18741	20717	15171	25405	14407	17226	22500	22536	17199	18861	24860	17775	16044	15632	17262	17401	14214	20558	13413	17675	19104	13052	17684
> limit Esi+ 7.334002 :110	23566	14976	21879	24955	11860	21965	24770	16492	18696	20202	21818	22465	25064	21385	24151	22595	21338	25024	17406	22483	23094	7474	20416	21717	18964	19665	22121	17285	18532	25617	23391	19682	15436	18971	21914	19634	22770	22155	7053	23918	20252
C25 H3 N3 O14 S	23699	5077	8110	11703	10536	11531	10864	5225	4744	9891	20328	12642	4173	9056	9883	19456	15104	23663	17457	8907	21330	16404	10072	9613	12892	16507	12965	5024	6679	7648	23536	10137	6603	4427	5826	9508	10546	5053	13196	16859	19401
> limit Esi+ 4.7250013	14123	13966	17751	27179	18947	22758	28138	21555	10945	29214	22707	13036	13877	23662	19365	28924	27486	23197	22339	18840	24462	17973	34071	16728	26587	16568	21511	18172	19120	21383	16791	19256	21494	19757	20568	22538	17266	16199	25319	21687	21806
> limit Esi+ 7.2330008	13256	11383	18767	10289	9396	6002	41025	9750	26152	7489	10199	14030	13213	6537	8980	16819	6693	12534	17484	10859	14089	20853	13783	6046	14974	9951	15090	21839	9293	8339	10107	12753	15567	39678	17438	23130	16868	12474	10904	9217	11779
C31 H22 N4 O18	25566	22998	29505	31115	19421	27768	23501	22233	21542	28366	22452	24102	21224	18861	22104	18772	24058	26150	21401	20202	22504	20669	22597	25627	23806	22382	24807	21805	24380	21795	21548	20126	22657	17686	21886	22174	23603	17834	13338	22864	23346
C42 H86 Cl N O	11437	7416	16764	13013	7910	9253	14810	9363	9355	8735	10791	12821	11413	10599	12927	17579	14087	6423	17579	12593	14530	10639	14234	6897	10662	9318	13126	24385	10400	10347	11779	12393	16664	10708	16093	15442	9944	12252	5187	8287	13124
PE(24:0/14:1(9Z))	15092	9641	17214	19923	6785	19249	14410	10799	19929	9663	16784	17108	23380	13627	16735	19127	8852	19760	26406	21739	18048	19910	21016	20795	10110	8037	16130	27050	17247	23230	14070	14662	22571	16007	15847	18220	19692	22580	4675	18677	18608
C37 H45 N6	20346	14577	20567	22862	16747	16843	18667	13225	18771	19095	20274	19390	18048	15469	24913	24308	15998	12308	26885	15625	18121	23418	19810	9285	18498	16415	20556	23389	14108	14936	15821	15466	24949	16235	21662	20198	19361	17876	13000	13597	18898
> limit Esi+ 7.3000007 :109	19888	11187	22324	19567	10827	18073	21578	13562	15785	17638	17846	23053	14924	15521	19850	25725	19314	17951	27415	18135	20262	15736	19810	13502	21152	15135	19088	29282	16940	16529	21394	18274	21685	11775	22451	20321	16984	16714	6791	15153	17783
> limit Esi+ 7.287 :108	27238	19109	34267	27630	14068	28034	30812	25033	23000	26660	28652	38813	30537	32592	29780	38532	24762	30438	36200	23203	30902	18710	39219	29596	37649	27010	31430	40900	28643	33946	28051	29742	28351	23718	32873	28355	28916	30704	12038	31926	32326
4-Demethylpremithramycinone	11749	7961	11510	11842	6344	20279	11522	9689	11741	12884	12611	18623	14401	13169	12179	10673	10831	13365	8738	12815	11699	12161	18686	14129	7359	4821	7992	10100	9826	8906	9703	6723	9483	10735	5565	12648	15771	12505	3520	13502	10741
C29 H54 N5 S	31933	29830	24470	32138	19516	28308	38422	15598	43055	42522	25601	24984	40510	20043	20870	38478	22233	28619	47500	40223	26223	29479	29044	17131	33844	22123	27729	42840	25589	19764	32630	29636	23297	35392	26543	27953	18598	33584	8070	24594	23590
> limit Esi+ 7.3309965	22653	18561	25502	24851	19065	23191	23685	21673	19223	24580	22329	24987	22501	21988	22253	23029	24565	24311	18415	22401	22176	10599	19601	20661	20746	20582	19984	21606	22984	25208	22499	20551	19320	17519	20365	20763	22406	22915	10294	23710	19816
C42 H80 N8 Esi+ 7.3049955	22845	12705	19964	22319	11562	19325	23560	14949	14304	16254	19931	23022	18318	17676	20678	27024	20856	19799	27093	21428	21845	13045	20175	16431	24752	15086	21481	25817	19406	15858	20872	19392	22254	15364	23622	18585	19432	24099	8329	19063	20492
> limit Esi+ 1.2989999	25078	20071	22770	27920	22591	23013	22416	11505	19423	24747	22979	32002	23138	26078	24515	5825	28663	23026	25425	19459	21119	24669	23935	24413	20926	24237	16074	18120	19764	15479	16575	12979	20292	17955	20790	23524	19865	28378	7474	16190	19782
C35 H14 N5 O7	36581	32736	35436	32315	33647	34542	32355	30961	29950	31876	33668	31988	32740	37984	26612	32471	30454	30613	31019	32018	30354	20609	28194	28834	31152	29797	31485	34043	29885	26350	28573	27153	23991	30739	25935	29754	26063	31979	29656	30200	19215
C36 H15 N12 O7	106571	11869	8764	120853	24460	13578	107483	21063	148459	21273	114903	13149	171457	89993	120940	133344	20047	137589	158718	135765	25778	136509	137328	142788	22148	15266	102863	7216	122437	10347	107000	18385	125413	29341	107973	30067	110439	153915	37911	124977	12600
Etoposide	21879	12776	16746	21874	7439	23429	20261	16248	19639	22007	20097	23939	23764	20404	21338	22482	20605	21212	18888	23164	20055	6607	22170	24719	19509	15569	16611	18814	20728	24469	18690	17640	16279	14352	15185	20330	24153	23749	4275	22226	20768
> limit Esi+ 7.3000007	21064	15197	28904	21707	14427	16376	19783	19758	20187	21308	22341	28433	22139	22897	23131	24085	25218	24429	23174	22526	23821	12739	26993	21589	28875	16702	23812	24851	21664	26785	16148	23425	20779	19068	23036	21858	22974	26174	9756	24397	19970
> limit Esi+ 7.3399973	17952	15047	16957	21946	13220	17821	16969	17947	17910	19073	16959	17008	19273	19295	19672	16068	16613	20323	8075	18994	17841	6114	17500	20348	13989	18220	13599	12403	13702	18878	18207	13613	13884	16181	17498	19861	19204	13152	9132	17908	16873
<none> Esi+ 7.313001	18129	7517	14318	18992	5757	22550	17710	12141	15697	16345	18107	20290	20792	14893	18375	15541	15901	15671	13774	18708	17287	6335	19625	20948	14825	12727	13048	13777	11496	21789	15799	11380	14939	14188	16943	15446	19762	17766	1103	17488	16386
> limit Esi+ 7.0669994 :107	37412	41633	30599	35156	39723	29893	33043	39835	34810	40325	36145	32252	11538	32014	36728	26057	34217	28695	9852	36072	37770	9726	29452	35130	37295	40162	33162	28494	30301	20696	33516	32614	34034	37900	16184	34839	31665	11365	34621	27736	11763
PE(22:6(4Z,7Z,10Z,13Z,16Z,19Z)/22:2(13Z,16Z))	42116	39652	15749	47158	41766	32255	44794	38642	37278	27012	32419	35129	29172	19399	34571	16580	24445	21848	20772	34925	32514	14916	34873	30141	25509	47648	19934	26170	22319	34280	17327	19121	26321	31737	34214	29488	19717	17388	12175	20011	33647
Megalomicin B	20549	7920	21974	22847	11472	26294	19567	13893	20771	8639	16963	21739	23985	14083	22494	20055	8673	26476	25211	23440	19558	21566	24194	21163	11187	12016	14690	29558	18811	21721	17363	13560	23923	19055	19754	23862	20965	27685	4606	16274	18878
C10 H21 N4	15699	217619	214518	16683	206023	206214	190838	259001	16155	221515	16074	212407	205716	24467	9444	17975	9053	17914	213230	211867	2551	11180	13742	11900	13135	10972	15906	196465	13699	16451	17824	14055	3853	205490	20210	18890	21906	13711	233895	15239	191532
C13 H16 N3 O14	36082	33212	17470	40543	22960	30847	43160	32574	27029	36620	37526	35748	36041	28889	36729	17109	34996	20044	34996	40293	38185	43648	49989	31600	37760	35330	36963	51533	30649	32541	37997	39775	43065	43117	39456	47468	16081	37362	25631	31751	37785
> limit Esi+ 1.2210004	72621	57547	24611	48515	41269	55662	58455	52926	39019	60636	59233	52609	20010	51600	50310	38907	31319	34325	58469	50732	41748	38115	49276	37158	31076	65579	33304	31039	61352	53746	63878	36311	50222	23345	48892	54538	27043	49738	45521	35380	41078
C13 H20 N O2	2780	12893	11810	8549	5241	12970	12971	14574	8909	8903	6911	10590	8876	11527	15540	17043	13360	14045	17936	13641	6718	16100	12215	15320	5882	5529	17017	9751	15853	16157	7886	13991	18709	10612	18894	10431	6397	14526	12901	11853	11315
2-Hexaprenylphenol Esi+ 4.3439994	72588	38284	59505	8067	6814	31068	82799	53000	34168	30773	72576	76802	85288	34314	31799	89169	4432	15370	29128	44496	69697	68428	28137	27774	36979	61201	67560	105838	36331	34192	70385	36577	49933	88997	80707	5644	34861	81738	4886	16312	73785
Theophylline Esi+ 8.3429985	148815	97477	136165	197219	118856	233106	167564	90928	103353	152459	165907	240522	97428	211769	263152	204670	145235	105330	134608	103327	151241	202387	261839	152261	159566	197687	159736	146035	73892	157620	165556	116561	156086	81626	153221	168995	271582	221593	45976	140530	143485
Picosulfate	17627	7533	28634	24081	7977	23034	20429	9672	10742	15222	17431	17268	13374	13555	24099	15408	17536	14024	15122	12104	17453	20740	17921	11246	11955	20114	21625	25011	8408	10240	16351	6838	26180	12012	27024	15162	22090	14292	5261	7571	16840
DG(20:1(11Z)/24:0/0:0)	35159	26607	21367	37765	18342	34486	30049	15205	19930	15510	21674	31940	50419	37652	30416	32818	16313	41316	25678	24365	28256	31698	46979	36974	20667	50645	22131	29834	30217	25503	25966	21977	31389	18137	33170	19765	25699	27807	18389	27896	28562
Dimethyl 4,4-o-Phenylene-Bis (3-Thiophanate)	19192	21513	27332	6431	5859	8336	10029	14607	17141	7852	12079	9689	14157	5080	8640	22547	7451	10696	38543	22392	12595	20751	6475	8749	26018	6260	15193	42811	5809	9429	15443	21882	23667	18197	21534	13917	10883	29769	4370	3796	10060
Dubamine	11665	14820	19131	10173	9772	15050	10627	13138	7869	12141	9864	13895	13472	15584	15302	13601	10364	11587	11926	12695	8216	11729	15794	12785	20724	16769	16753	6385	9880	14698	15779	10938	10125	4753	9365	12215	16907	16874	6989	10302	9566
CE(22:2(13Z,16Z))	9001	5527	12854	10516	4117	14520	10573	7446	16929	3310	10159	12443	18777	9844	12974	13564	3377	18647	21025	17216	10143	12596	12768	17566	6662	5062	10580	20462	13063	17603	10899	11250	14599	10529	10771	10394	14759	22159	3128	16481	10535
> limit Esi+ 7.335001	26341	19797	25382	31870	20748	29448	30353	23981	25812	27729	27544	30374	30628	24096	29630	28841	27642	32363	24054	26652	25582	13459	28539	26160	24960	21865	24974	27714	22121	29293	28887	23563	27184	23600	28253	30732	25295	30733	12398	25626	29236
> limit Esi+ 7.3289995 :105	20109	13316	19353	19429	10642	16578	18513	15202	15064	14167	17503	18392	20860	17733	18887	16006	17718	20905	15852	14341	19294	8174	19120	15171	16623	13863	17679	13954	15097	19760	15286	14051	13915	14661	17809	15858	14884	15257	4700	16482	18540
C21 H43 N16 O9	68870	76775	46046	83082	70124	53706	90759	77915	94403	83363	72154	49537	109970	40283	71877	55005	76794	89414	78932	85472	63531	57794	57913	43502	41818	31099	48979	70146	84752	78095	67366	61251	50225	89005	53664	89156	36831	61383	47821	70309	74120
> limit Esi+ 1.382	25380	15005	19080	29009	23257	46689	17148	19493	13710	26891	28488	29272	14653	15200	22689	27931	23560	32020	20199	13231	29025	32796	22481	18563	19107	17344	18706	20692	14384	22196	37106	22887	5319	17450	13171	22832	20850	20523	17448	31240	25198
C20 H43 N21 O5	23377	20636	19231	31173	25093	32551	27867	28287	14682	25913	27317	28079	17129	29326	30447	26492	35962	22971	22519	29826	23386	26086	27732	22217	17336	17530	15576	19318	23843	21517	22296	21940	13714	20400	13062	18871	21125	23794	16079	18823	26864
4-Hydroxybutyryl-CoA	7861	3606	8371	8702	2786	12640	8010	5932	14184	5288	8505	10611	19576	5190	10525	12689	5222	14063	16762	11522	8644	12545	10842	13113	2685	3468	7227	17454	9363	12217	9487	7947	11270	10540	8227	9994	10180	16102	1446	13067	8054
<none> Esi+ 7.095998 :104	14144	9656	13695	16554	6378	20942	16552	12267	21075	9579	15557	16366	26785	11405	17107	18592	8147	21248	23079	19768	14934	18478	19701	22192	9680	7786	12824	26499	19661	21717	17783	13047	18071	18143	14551	14542	16780	24838	3663	20725	15333
C35 H41 N15 O3	21868	14494	13013	31388	23242	26181	27497	18663	26323	26553	20256	22222	29669	18789	30369	14142	22579	26168	24993	20739	21005	13698	30362	14508	4264	6855	8115	17571	20797	16955	21576	12663	11653	24181	11107	25452	18561	13800	9446	15891	19346
Soyasapogenol C	21209	14370	21825	22328	22333	14622	21396	13772	26728	24046	22585	18761	18630	18167	18599	20568	16129	15885	19942	23189	14120	20094	11816	21065	17347	13646	18504	14813	19061	16757	23636	18837	20178	17655	12909	14089	14762	13074	8903	8579	14988
C21 H11 N4 O14	6967	5195	9871	12974	4477	6857	10368	6587	1157286	10651	7337	10184	1233103	6086	7151	3317	16934	5998	5371	5987	8416	14963	6471	1172099	3370	7635	4763	5990	1110350	1149186	7973	1045100	10478	2553	9019	20262	3985	2699	1700	2288	8414
> limit Esi+ 1.2490003	24228	37158	45855	49020	44070	60339	45252	31615	41638	30421	54129	51852	37054	38577	44263	47053	51298	49403	30640	48153	24882	29983	41707	23516	48811	44924	27765	36251	43972	36706	54180	44497	44471	43245	47453	48742	35528	46420	20170	41731	27695
PE(15:0/14:0) Esi+ 1.6469998	56046	72731	45805	36546	44529	36288	44512	72075	55650	35255	59852	42661	50916	45349	51984	79766	34948	51389	59590	51019	67683	47023	35589	46229	65390	45237	47054	83795	50832	62437	66004	59878	55347	68231	56284	49418	47381	60864	55574	39621	65584
> limit Esi+ 1.3629998	33364	28829	22947	19326	25900	36801	21024	20290	20483	24895	29529	25271	16268	18185	21572	17414	21405	21777	23922	20314	31101	24954	20106	20676	29862	18368	17096	22594	17140	23183	18983	20483	17892	18365	20702	18606	14287	18507	25365	17478	27089
<none> Esi+ 7.313998	18620	10375	18007	21565	8364	21960	16739	14946	16789	16862	18530	20727	19782	19371	18036	19100	17955	19015	16833	18191	18322	8532	16769	19553	18677	15050	16149	11053	17969	24021	18654	17936	13367	14485	17406	16480	18795	20386	2132	22141	18050
Isoflavone 7-O-beta-D-glucoside	1224847	1660286	1102387	530648	1044644	785467	1070868	1101887	786777	918148	1191406	868787	1999927	1320949	1219574	1562719	1179539	1694868	1299301	851707	1124635	800988	1094848	1709490	1982636	1299045	1388762	440217	2301244	2421646	1159324	1753625	1009074	942864	1024493	800054	1341249	2068289	2171260	3014585	1385894
C30 H19 N14	13300	9145	16371	16908	19192	14428	13126	11856	20265	9312	13048	10357	12721	6623	15491	24963	7754	6387	26991	16954	12540	22910	3599	9394	11800	11184	12546	25104	7357	8850	13225	17615	17681	12857	20149	11284	10129	20130	9159	5203	13265
> limit Esi+ 7.2980013 :103	13555	8290	18508	11255	7950	18242	13658	8579	12240	13783	13800	12022	14603	14186	14949	17674	11562	9454	22564	11984	15841	25105	13111	12578	16224	5536	12945	19906	9178	16293	14057	21042	20490	13227	13278	13173	15325	15823	1577	9965	15832
<none> Esi+ 7.078002	27906	26140	18986	26686	25280	25803	27081	26758	26229	24506	26729	25575	26836	26631	22216	25243	26738	26906	19383	25305	27034	24762	24956	24664	25344	27031	26109	24102	25149	24704	24883	26857	27445	25661	25454	24717	26483	24692	22030	25396	27057
Nystatin A1 Esi+ 7.0169992	162775	170978	11372	161159	173076	130120	13471	178447	10997	157031	12739	12087	130844	158366	146078	155100	156112	11317	128098	155327	14131	140338	7826	160152	16782	179266	156981	8870	14227	136423	167026	149486	138088	14454	150404	12652	145602	146048	132160	146120	14203
C56 H21 O S	27642	28989	26233	20990	30909	26010	24494	28936	25607	25649	25811	17259	27371	26460	24797	25465	29895	27676	19533	26588	26694	16232	24670	24424	28862	32356	25469	14605	27697	28457	25055	18086	23566	26893	25058	25259	26966	26256	30583	26051	26111
> limit Esi+ 7.332	26761	22565	27628	30733	19301	26601	25188	24505	23669	27768	24664	30727	28105	28172	26404	25926	27907	28420	22425	24787	25888	11571	29350	27018	24985	24327	26179	23744	25669	27731	26883	17957	22158	21211	23345	26479	27823	26765	11894	26494	26524
Soyasapogenol B 3-O-D-glucuronide	28010	27267	25185	7140	13707	12749	7647	14813	10445	17589	11948	21490	14328	27489	12621	15193	25127	24775	15774	20100	17898	19573	11611	13189	16463	19559	6732	13555	20712	17862	16564	16248	11222	24308	24372	11614	24967	12524	20567	9821	18892
> limit Esi+ 7.9620028	21995	21882	21984	18142	16860	18282	18552	22543	22398	16274	22359	17906	16982	19529	16618	24422	20813	17848	23806	23315	22409	21231	19650	20869	23511	20463	22467	23756	20996	18306	20435	19876	22778	24235	25344	18836	17570	22055	24814	22349	26385
C47 H8 N10 O	29504	13156	21219	17604	7626	31293	25739	19349	27547	13311	18849	23704	35861	20871	24282	24963	17970	27932	37672	30402	22863	32044	27880	30644	18872	10225	14712	39677	24567	22942	24380	21606	22697	26021	19678	25469	24737	31338	7558	25128	26473
C23 H19 N O26	22661	5049	7325	11651	7064	14849	10822	1365	4251	8870	20784	11102	6247	6500	8209	20399	15813	21948	18301	6325	18993	16759	9562	11627	11139	14348	12527	7320	6140	3220	18688	9172	6823	3598	5183	9958	10475	7829	9705	16240	21231
C16 H2 N O14 S2	16999	23284	15290	15437	20880	15417	15747	16674	16880	17459	16465	16443	15547	14751	10789	13775	18365	14404	10445	15321	12280	12923	15513	16832	17310	15194	15248	10319	19235	15435	16132	14051	13722	15002	13400	14396	15321	12883	22819	16472	15465
C29 H13 N15 O3	17537	11077	17664	19139	8418	19173	15859	12691	15428	17956	13428	17015	19579	16337	16316	15989	16974	16320	10687	18304	15572	6868	16369	17694	14178	9300	16365	13612	13790	18849	17517	15102	15498	14077	16424	17882	15965	17096	3680	18021	15424
Microcystin LR	19861	18694	20133	21751	18609	19739	21683	20940	19171	22842	22433	22020	19227	21050	17460	21007	21118	17297	20244	20651	20011	19720	21110	18982	22270	19276	17523	18525	22550	18395	23027	19998	21576	22848	19905	20576	22018	20529	16172	21506	22296
> limit Esi+ 7.208004	17431	28860	36250	48276	13866	49682	18037	18108	14880	24639	40605	49409	43633	23852	48513	40384	22780	15378	42345	20066	43491	40854	48275	41391	32520	12583	13816	13273	14405	40925	18679	12681	16277	17776	11861	17372	46245	41983	19168	44246	40628
> limit Esi+ 7.1040025 :102	8210	7446	14382	15155	2921	24464	12084	6916	20790	5302	13389	14971	28714	10025	14459	18519	6014	19750	23379	16865	13175	20645	18528	18848	6418	5218	11845	28716	17505	19899	13419	12950	12096	11713	13253	18106	15470	25446	4917	17479	9744
C22 H14 N5 O13 S	20033	19733	20733	26393	18631	20413	23303	20286	27339	20826	18981	24433	24161	23365	26511	24448	21059	26410	23955	23467	27124	29555	24980	28286	27060	23957	29192	26061	27357	19554	26783	22505	26884	23341	29333	20901	20022	26862	19850	20323	23137
C45 H71 N6 O2	47619	13833	20388	35367	6839	37984	34066	11717	22536	20124	49865	32702	23576	15779	23503	43265	36765	51664	31136	18484	45648	38502	18484	33231	45723	34120	36573	24519	35151	30115	31556	27836	26144	30439	27426	20706	37542	22390	33982	47989	43789
> limit Esi+ 7.005999	26681	26934	27526	26665	25018	25106	25390	28166	26127	24425	28683	24347	24396	27496	23480	27950	27158	24518	23452	25079	25544	29477	22541	21430	21762	28996	26244	29021	24491	27514	26862	27728	26525	22370	25840	24340	25957	23249	17970	28562	26937
Integerressine Esi+ 5.544002 :101	48576	46946	39452	68719	38178	50647	82057	53306	92289	59268	52059	47323	61600	34630	53126	38013	37053	53639	69732	97060	51488	47340	50385	27476	30002	26922	39011	62119	21924	40253	46656	73724	60176	69533	53118	69376	32213	43106	46179	36890	49403
C21 H19 N14 O7 S	17067	9999	21173	12592	16759	14951	11917	9679	48427	18245	16344	18729	16630	20864	17952	16071	14809	69159	16498	9430	17140	23083	18214	55272	13077	24364	26475	94989	13143	16790	16580	16698	20610	48305	23996	14119	17318	12709	9078	13376	15023
> limit Esi+ 7.265002	36509	41013	32095	24345	41028	33825	35909	31548	101628	12626	35198	31598	32650	31343	86697	25507	34786	14003	100464	41347	34679	83654	11471	100842	16613	27988	36022	32162	41350	27288	37426	17076	82976	37272	25513	37613	16030	31750	41821	72868	34863
C43 H71 N O3	32990	47512	15226	57091	61974	54046	58257	46187	48412	70074	28322	14643	30757	18023	41409	12944	36829	71196	25510	42174	32620	13677	10288	44440	40520	40561	27364	11912	16457	33171	26618	31985	18985	41409	45584	54253	9553	26139	41891	44585	47742
C29 H41 N	29149	28059	24160	31162	22695	25119	32300	32428	39900	29991	32232	19003	26170	30330	30661	36476	25847	24258	25162	43796	31588	25686	24766	29710	24387	29449	25165	22014	25108	26179	32307	22619	23551	34701	25874	31486	25186	23866	19756	24023	31690
> limit Esi+ 6.802001	22113	23301	18996	22873	23637	21740	23047	20854	20431	21374	21954	21889	21972	21096	21427	19739	22915	20363	19019	21032	23171	19702	23717	22019	20625	19890	18769	16187	23045	20309	22114	19976	20945	23418	19645	19348	20386	20998	18881	19819	22919
> limit Esi+ 7.0099993 :100	16861	21520	19286	15797	20014	20399	16040	19438	18890	24582	19630	16417	16261	22290	19606	18733	18349	16530	14646	19203	18853	19480	17094	21671	21650	23928	20360	18461	19043	19065	20433	18250	16158	17778	21462	22876	19374	18343	16543	18755	18933
Lilaline	20690	22381	21947	16421	18069	21414	16675	16219	24109	22274	18176	16321	14946	17659	19491	21141	15960	14803	21948	22142	18402	23066	14437	18405	21453	17688	20984	20580	14466	15509	21073	18210	18101	17761	23071	20049	19062	26863	17765	18019	18239
Azidopine Esi+ 7.0980024	7790	6379	10197	7869	2845	18316	9996	5530	16922	5796	8783	9976	19749	9132	12459	12847	3286	13791	17300	16430	7308	14249	12224	17079	6275	4728	8542	17583	8613	14163	11422	7478	9295	9579	11675	11344	12982	18579	93341	12003	7792
dTDP-L-4-oxovancosamine	23928	14790	24375	23057	5819	26843	20476	15208	12852	14562	21163	12462	19895	22291	27317	26521	14144	13536	25489	15829	19426	27849	21962	20255	9463	24395	23826	31176	16689	20382	22197	21708	23617	16198	15462	21703	25633	27622	11892	20307	19103
Mifepristone	26494	7591	13220	17546	11045	20826	16646	6565	6381	16464	25451	18563	8512	13093	14891	25939	16123	25227	21234	13335	25065	27228	11731	15564	20343	20475	20241	12536	9989	6760	23685	12063	9538	6328	7628	18387	12418	12450	4648	18244	25465
C34 H68 N3 O3	16824	121906	20204	22635	11627	19228	18803	104497	15138	31737	13739	19845	9481	19900	24162	15069	32490	9504	15996	11482	15210	27186	17659	78351	6992	16624	12845	13997	71247	9802	14255	11010	16657	9612	17883	17413	18456	19072	73301	7884	16217
Meloside A	28443	17157	24727	27241	9923	32908	22172	19517	21501	23569	25918	28541	25062	24007	21927	23891	24238	21854	22332	20869	20811	15058	25100	26630	22484	16436	18591	21144	20445	25433	20672	20284	15814	15295	17387	17372	21517	24035	3190	25182	18425
PG(18:2(9Z,12Z)/18:3(6Z,9Z,12Z))	24638	21049	35222	24594	22916	24673	26479	28593	26591	23053	26144	23769	25656	24548	38584	24411	21908	22927	29504	22921	24684	26553	24094	19473	24467	20755	22126	32762	37105	20542	26235	28285	25307	24253	25308	29171	24402	30693	12857	20860	23409
C26 H41 O3	48092	60940	55811	68335	51882	46969	59817	48264	66866	22026	61793	50162	46129	19862	47621	51102	31302	55728	52824	63713	57071	59857	23164	39360	53473	59195	51589	26600	8042	21663	48974	50835	42403	48724	47375	54517	42399	50245	17323	35363	58146
Taurohyocholic acid Esi+ 5.431	44380	41590	43791	60108	14116	51528	62707	49784	77057	43330	46603	64437	54584	20076	57048	10869	32420	50141	58328	84331	44773	40965	50334	34136	28160	27057	39820	58234	13800	42074	45833	23267	58306	67113	53102	56037	29167	31934	27407	49415	10695
CDP-DG(16:0/18:1(11Z)) Esi+ 7.0669994	43121	48808	41649	41189	52165	35300	41827	46009	14602	46359	44895	40516	14346	45445	40830	38465	50277	39482	35363	39681	43954	12998	14032	40960	48448	51211	42809	11324	44632	39288	43014	43703	42225	16942	17288	42013	43295	16004	46409	14328	16621
> limit Esi+ 7.101 :99	14895	10599	18604	24702	7935	24932	19583	13025	23433	8228	16935	19549	25930	13585	21252	24613	11050	22670	26541	20785	15777	22567	21780	23206	9053	10549	10797	31387	18037	23479	15801	15442	24638	16162	20153	18754	16800	28904	2306	15214	16477
Methyl selenac	21954	3806	7194	13524	8567	14293	12180	5098	4966	10459	22833	11491	4110	6395	8909	18017	15687	26662	15722	7790	21401	17169	10488	10716	14774	14178	12649	7831	7063	4743	21822	8790	5575	4096	5419	10966	10373	6833	11201	18989	21383
C6 H16 N5 O3	22958	9313	29226	22211	19539	27677	23104	11656	16758	19829	18289	25639	17116	21050	28536	20564	18537	17025	14430	18482	18252	25369	23867	18023	13780	24638	24131	24660	14589	16810	23308	6100	26521	14542	29723	16851	24431	14323	11359	11346	17515
C41 H85 N2 O S	29520	14940	25569	24996	8576	28755	22668	20883	19303	24802	16166	13949	24318	27869	21501	21872	22055	24402	16781	18742	20053	12087	25087	27934	21172	19699	19885	15524	21068	25811	19734	19429	16878	14308	18537	17574	23014	20652	1300	16011	20542
Phenkapton Esi+ 6.897002	20656	26093	18328	17535	27128	18012	17337	24516	20038	19886	11191	9129	19801	21309	17373	15148	21832	21105	16408	18527	19603	16392	18107	22129	19330	22548	19130	17463	24680	19074	17997	17881	17968	19143	18892	18103	19770	14968	22931	8300	19111
C26 H16 N9 O14	14264	21667	19097	11119	17300	10579	14369	17782	18471	12007	17181	7875	18100	10059	15731	14586	8352	9368	22805	19397	17892	18233	13764	6146	15912	14544	14007	25790	23833	8317	17932	18055	17558	24371	17666	13228	8507	18489	22027	3471	15994
> limit Esi+ 5.1900015	26202	24662	27951	16570	22473	16774	13893	21473	11184	18867	23269	23715	14472	30849	19931	23602	24696	20806	14557	14638	24787	12924	20263	26174	32234	33151	29871	14972	24001	22237	23413	26555	21938	13782	23600	14503	29652	13513	33633	28110	23499
Phaseolotoxin	15671	7027	26123	16086	10236	19451	11823	4985	15536	10463	15195	19491	21537	18760	20098	19221	8919	22231	17790	11382	14451	24722	21541	13676	9202	13705	20682	11450	13449	17760	16669	17376	24126	4894	24819	13899	16276	14505	2871	17663	13191
p-Nitrophenyl-O-ethyl ethylphosphonate Esi+ 7.096998	2136520	1521428	2145964	2157828	1369533	2363811	2063733	1575560	2349290	1728818	2071662	2146482	2567401	1918709	2167902	2218611	26470	2313955	2386587	2163207	2045278	2234900	2222567	2331827	1698621	1470609	1979289	2447506	2153059	2259870	2035572	1941261	2154285	1981843	2051231	24957	2098251	2373649	939523	2188849	2007793
C20 H22 N11 O13 S	52860	42926	71047	41189	37822	18340	42025	32068	58812	29752	47333	26382	53842	23168	39951	55007	23374	20582	108479	50925	41949	70892	21926	19962	45278	28803	35666	123377	39779	20824	47085	70079	69936	54665	58152	31197	17905	71364	28345	14785	46961
C36 H28 N2	23420	20311	24975	24866	24900	25487	16616	16015	16996	24382	21842	23363	25196	26574	21645	21304	24329	21549	22951	24466	20779	24001	27096	21873	24218	22169	27351	16745	19383	24615	20672	22294	24117	23983	25006	24945	25073	24325	8109	25246	18302
C38 H81 N5 O2	27345	11245	29784	25889	10635	31545	26820	21741	19939	26511	25922	30971	23958	24495	24338	27403	24463	24698	29612	28019	21201	19067	28065	26302	25335	18799	27319	34760	17179	25106	23524	26215	25488	21533	26581	22663	23681	24435	3480	23675	25460
> limit Esi+ 6.7839975	24456	22405	23308	27379	22936	26308	24671	23305	26122	24647	24109	24372	24111	23540	19789	22032	25100	24294	22287	25304	21608	23837	25026	22771	22368	21808	22942	22974	21565	24286	24523	23112	23750	24182	23814	21757	25600	21984	22292	22559	21185
PE(20:4(5Z,8Z,11Z,14Z)/20:3(5Z,8Z,11Z))	29008	21785	35554	32955	24513	24777	23622	29344	33529	32905	33675	17394	26921	18924	21155	41798	25646	12866	46673	17684	33946	39380	23810	21698	35487	28008	33432	49509	24088	27659	33759	35218	34287	21796	34391	32118	24612	42089	15180	22260	25785
C27 H22 N6 O12	17534	7728	20966	17437	12189	39876	23330	7406	14624	26898	15773	18030	17587	18194	34502	31648	12746	14859	32091	12672	27260	23212	19363	12028	10290	18614	24099	10097	22736	14402	29690	28894	19461	6029	20464	24298	16892	13866	5036	12781	15006
> limit Esi+ 7.0129995	25893	32338	25359	28365	32406	28387	24452	30205	25050	28184	28008	27051	26085	26925	26437	27111	28091	25668	24317	25121	33065	25199	26925	28992	28508	31216	26329	26318	26963	26625	27733	27727	25403	28845	27965	29765	25620	25135	26670	28399	29362
<none> Esi+ 7.2940035 :97	12435	4967	17511	10341	3562	10243	13246	7420	10395	10457	13480	13378	12290	10065	13492	19808	9550	10577	21913	9839	12842	12225	14602	6785	16155	8536	11572	22772	7401	10968	12813	15665	14932	7812	13796	13175	10580	13062	1385	9773	12556
> limit Esi+ 7.061002	23181	38420	48938	74856	61032	20859	39319	31173	48541	19155	48038	33367	44841	37327	47562	25819	34608	17587	2440	21330	47553	24730	21069	36331	49717	39225	47688	31891	16554	36200	19385	51363	20662	42145	72678	47714	67112	62251	52067	40394	16872
C37 H57 N10 O2	35250	32840	31291	30308	30623	33517	47605	23640	50486	41292	36924	26396	39260	17272	50024	28645	30353	29207	17679	33513	33600	25977	32706	20016	33830	15849	25078	20771	37598	17305	34399	26395	23072	34522	25681	42142	39392	28874	24038	13682	27397
C40 H83 N	14696	18161	28284	31896	15547	38132	28241	24359	27290	29990	30014	23841	14846	14773	17451	28722	34218	32658	31934	30137	29369	22523	25509	33233	35260	22071	26968	24777	32891	40893	28268	30838	15665	21888	25505	26449	15633	28988	6949	37114	32505
N-Dimethyl-2-aminoethylphosphonate	53030	29810	59175	38930	47294	53083	47458	36991	46579	50721	54745	39772	50283	50050	59625	6641	42406	59322	4083	51588	54614	60751	54759	36250	56445	33072	54140	14571	45966	62453	48041	53689	3043	43511	46437	47715	13872	51188	16885	44337	55149
6-Carboxyhexanoyl-CoA (Pimeloyl-CoA)	10528	13880	6503	19398	11048	11931	24900	18333	32840	20374	18206	17698	22806	7894	13232	4671	21210	16324	21983	31716	19576	6230	14460	11759	7799	5185	9278	11951	14362	15787	20130	8966	10453	30379	13270	26789	14533	5368	11709	15653	17853
10-Deoxymethynolide	11340	9281	18442	12979	16235	14827	11725	6482	11730	16018	14844	15832	15604	16814	17548	15568	13948	15445	16139	6794	15423	20140	16436	11554	9619	25282	25040	8894	16925	15631	13840	15393	18907	7128	21304	13005	17797	10595	8294	17793	16639
C18 H30 Cl3 N4 O6 S3	15693	10116	18870	11335	13862	25131	15873	9030	25693	11253	12717	20950	25997	13530	22708	24314	10838	15113	22347	26685	16722	24705	23855	23031	11809	19639	14005	25495	19668	25246	14375	11289	20060	17147	20293	17132	20207	16695	4924	15471	20444
C22 H17 N13 O10	11944	5779	13182	15205	4260	14048	13534	13457	9934	12211	12785	20469	12751	9093	13817	17003	12751	12706	19237	10958	9943	15663	16363	9555	12665	7963	12388	22681	10430	13303	12678	11719	14779	11223	12491	18100	10252	13057	2684	12701	11992
C22 H46 Cl2 N11 O8	25085	23834	31156	28453	7320	5579	21006	29973	35014	24336	18591	23454	11135	6147	8831	11448	15330	17656	27938	54825	24146	17457	18087	14432	13781	7794	25835	23907	3248	5380	13920	7638	37471	19222	36249	17495	4691	20510	6923	12520	10913
C44 H85 N3 O3	24904	11205	33317	24032	7736	19883	26155	17361	15370	19990	23025	28692	23157	21913	23454	35753	22569	23807	33727	23456	26835	21019	26421	17764	29895	17144	25232	43042	15300	27525	28704	26472	28287	19386	28168	23659	20427	25208	1914	21295	23660
> limit Esi+ 1.4049996	24161	20863	2013	13193	12966	11898	10346	6542	7807	12411	18999	17582	3237	6976	7016	18695	26276	15992	12021	17698	17761	15367	14791	2353	5467	11690	10579	5615	8470	16764	15705	5331	16795	6945	3517	5529	10103	9138	7488	16962	12744
C36 H78 N10	50440	63938	63615	48646	52181	67477	50075	54628	47506	65270	59341	43604	54893	43995	45841	62750	68165	69502	46005	38924	68048	50170	60878	59627	45698	56079	40513	33999	62966	45478	65211	59837	47695	54106	63013	51147	44158	43040	52637	55395	57290
> limit Esi+ 7.067997 :96	44979	48293	40893	43251	46288	38937	44358	47176	39819	47486	44185	41171	15560	46085	39807	41015	47231	40153	15094	41459	40999	17079	41420	41499	39267	44864	44188	34803	44115	40230	20131	43122	40216	42718	42767	42737	39621	34584	40341	42618	41277
C19 H15 N17 O5 S	21016	11634	31579	18210	18249	93974	17597	11404	67586	20070	18478	96190	20958	23071	26343	94191	16670	75703	18833	15025	20339	28052	20675	23063	7497	29465	28443	104835	15714	20756	20511	26550	87948	59315	25456	24761	21050	17599	20794	19409	80556
C36 H6 N8 O11	24890	21184	21493	30340	27612	27634	20213	20814	23746	21435	30613	21190	27978	24477	22507	24598	19200	20688	18466	21286	22208	20509	20946	20092	21672	21175	21514	22156	18282	23824	21441	31290	20808	19683	20319	24895	27936	19377	13821	23581	21967
Vicenistatin Esi+ 1.3650006	52302	39055	32916	33824	40013	61072	33294	25079	39987	32425	43407	31086	21487	38015	35674	23300	36225	20201	33352	34815	48058	32336	40112	24772	29912	22386	34893	36738	26708	22262	37755	36737	34423	17170	22659	35028	31949	34645	20809	21584	43798
> limit Esi+ 9.160003	13096	6902	21216	9871	2407	6498	7209	4885	4783	5153	11274	6515	13036	8467	8755	26155	4556	10959	26057	6943	12302	16410	10142	5867	19340	11828	16631	23526	8543	6874	10911	17932	16935	6698	17402	3172	7840	22893	1276	5608	9764
> limit Esi+ 1.2529994 :95	24175	14111	25533	23747	13813	17787	30779	25805	21882	23539	21118	23534	15131	21856	15979	33528	18315	16448	24137	28373	21283	19761	15790	4455	16240	12896	30937	28958	6704	10305	24365	16754	30111	14234	17042	25043	29030	28206	8726	15975	19943
> limit Esi+ 7.328002	19185	16422	19340	24792	13846	23261	19256	19419	18631	20111	19023	23580	25045	21270	22514	19371	22447	22090	13535	22502	20807	4873	23896	22212	18894	17307	20306	14861	21241	24676	22806	17349	12837	16978	19898	23242	22954	18680	8096	24071	19062
Thiophene-2-carbonyl-CoA Esi+ 7.1060004	23956	12998	22549	26110	7619	39925	21348	14082	32291	13763	22352	26169	46278	19215	28495	32033	10630	32267	44641	32514	20747	35270	30640	30961	12360	10483	17287	45892	24606	32230	24854	22591	29097	22447	22416	28344	26021	39785	3639	27370	22427
<none> Esi+ 7.096998	32323	23812	24122	31286	16377	19780	10589	25196	34269	18880	20629	28940	32018	27653	26439	24633	19443	32570	27666	32917	29120	32453	29365	28715	26747	18632	32681	26567	30890	26706	31146	28021	32409	29417	24973	31761	18359	33781	13041	26936	24353
C32 H33 O10	15957	12335	16690	20212	29223	15212	15457	14501	26353	12454	18684	9000	10938	5394	17144	27876	9617	5787	28298	20990	14570	26356	4597	6734	13403	16154	12457	26244	4776	6669	14107	16173	22982	15782	24946	15106	11573	21922	12110	5822	12870
> limit Esi+ 1.271 :94	51726	52112	45365	137576	37224	54127	38584	40901	43735	52116	51653	44264	65605	44158	60243	48127	40930	53490	32181	72403	21457	47711	96419	50941	57732	48112	40143	29110	69153	51971	46597	53860	33881	80121	40469	17393	53136	54404	41633	70328	55653
> limit Esi+ 6.7680025 :93	17393	10409	19295	22418	12004	20940	20896	16011	22476	20134	17808	20857	20123	15658	18778	16713	18627	17971	24913	20979	18383	21611	20070	16330	16692	14335	17703	25103	11213	17070	18618	17844	20502	20383	20422	19473	19231	19497	10491	16569	18683
Staphyloxanthin Esi+ 7.1040025	20618	8135	21519	20340	7402	24316	19060	10987	25461	16417	19567	21892	32144	12281	20606	18107	11989	23254	24838	22234	19111	22972	19731	19467	15299	12031	19385	32468	15374	25693	18827	14365	20689	15491	19921	20698	21386	27444	4623	21291	17148
> limit Esi+ 1.2560004 :92	19826	11817	19991	33299	15191	19133	23595	25356	19548	26868	20192	20348	14606	22855	17547	21409	23819	16349	10125	21093	19686	15114	17109	8441	3927	8775	21582	13901	6243	9627	18362	10658	21353	15276	16165	25898	28891	17031	7431	17072	18795
Avermectin A1a monosaccharide Esi+ 3.9299986	24253	13837	10621	31292	17980	35797	48353	28826	14449	34269	24703	29658	23961	12385	39439	12886	34757	25935	13161	49812	24922	21377	42673	9253	10751	7086	6091	23610	9074	20919	22915	6779	10398	27500	12722	30205	25672	21544	7099	16574	25858
PE(18:0/14:0)	67356	97621	70043	52170	65157	33804	47869	71369	65003	29998	55167	62209	52711	58282	44509	50916	61566	37536	54757	50831	39071	63512	51845	63508	55091	63727	64811	29849	58689	53033	38960	69761	40476	45493	55226	43723	50192	34833	93407	62705	47745
> limit Esi+ 7.2839975 :91	21879	17743	21127	23191	17871	21661	19908	20971	19762	21635	20939	21649	22238	21858	21255	22660	21122	24239	22521	22302	21316	12829	22850	22253	23012	20377	22643	24739	21173	22350	21766	17993	18809	16592	19359	22464	20972	19152	12094	21920	21615
Lipoyl-AMP	55344	43772	41760	42271	12937	11015	47749	38468	68706	26968	36839	36786	23442	35121	49198	44126	31415	32939	58695	49509	35383	38158	34104	9150	34532	17070	17862	69946	29849	22743	42347	33517	35491	58016	36031	20670	25119	42211	8341	14375	44233
C22 H19 N13 O14	11405	7541	10996	12216	2460	15567	15110	7729	21110	6107	10079	16272	27385	10872	16618	18467	7344	19878	37849	18572	12116	17625	18350	21238	7928	5491	11191	25572	17570	18874	15154	10101	14483	17737	11358	15906	14503	23330	4706	18630	15496
C44 H84 N2 O2 Esi+ 1.2649996	44248	35492	24884	32994	26491	25458	32156	242117	35796	27751	41504	22379	25417	59853	29390	137680	19374	25896	24169	50803	37469	20967	18376	18798	13655	13932	65086	20890	13537	17873	43230	15802	46638	23142	16788	26948	111384	35934	16398	42294	40099
C41 H39 N3	17131	29834	28613	20337	29392	17696	28626	20373	38042	22320	16636	34556	34020	23886	36576	36878	29584	39009	56395	45359	22624	44909	37543	16907	27098	22114	32365	29414	20276	28366	25779	16543	24412	34745	19299	37439	15869	33648	13521	32871	19933
C16 H6 N2 O20	18883	14088	14825	21974	14664	17756	18892	16354	20336	18167	20139	17658	20218	14276	18240	21388	14921	8993	25034	19547	19147	21083	19792	11565	16145	16348	16361	28275	17184	13442	19643	18223	18439	19878	19091	18937	18731	12455	7575	15777	19652
Fagomine Esi+ 6.106002	16892	10722	18572	18264	22090	18554	26211	18961	36703	20692	20522	19872	21144	14113	22091	23627	18537	17507	32347	27562	21739	19738	24299	18974	22576	12858	16229	27867	16946	15806	22631	20438	22007	33050	20376	26947	13627	25749	13642	15758	22550
> limit Esi+ 7.1779985 :90	10197	17654	12837	11088	181565	7192	13698	17649	12891	18438	11325	10505	6985	16174	11989	10145	17881	6859	9721	9297	15281	10599	8132	11785	21946	22449	16204	7560	13744	8724	14741	16118	7775	14570	15311	12716	12012	11923	139713	12369	13736
PE(20:3(8Z,11Z,14Z)/20:3(8Z,11Z,14Z))	38047	31911	28643	40179	21863	36748	27003	33816	36805	37419	36044	35436	35801	33362	34825	43175	16566	31589	39562	29370	37543	45204	28646	20956	38378	33963	29559	52153	30499	21804	21718	51414	39482	33793	38119	40335	32158	42799	14523	26780	35095
Irilone	11466	10452	17318	13242	6781	14928	13486	9587	14698	9027	15898	12026	14345	9393	11233	19515	10111	12078	28425	11365	13656	17358	10517	11933	14852	9662	13645	32001	9978	14898	15971	13343	15863	13383	14600	13244	11515	22362	2053	7923	10648
C15 H29 Cl O17 S4	26957	26658	29789	28991	21821	28753	22710	24595	29616	21334	30649	24418	25428	32164	24422	26735	26425	26089	24337	21424	27554	22741	21669	28453	28874	28166	26559	25154	28297	30138	28217	27564	26593	27633	27938	26182	28436	28074	15120	28752	26892
C39 H84 N3 O5	24286	20102	27782	26475	11958	29118	23723	19609	24652	24514	26481	24336	24583	28922	22916	23985	27600	29984	23081	27863	25929	8772	23835	27667	26986	23752	22338	23218	23581	31986	27729	21237	20681	21938	21169	22452	30652	31191	5514	24737	24173
PE(24:1(15Z)/22:0)	23470	20354	26341	27429	12441	28747	23840	21167	24259	26332	27230	23492	23300	26201	23324	21171	25491	29042	20255	19899	25603	5343	21406	25468	24008	22818	21671	19001	23078	27339	25556	16711	17327	19377	22197	22512	26896	25552	6502	18588	22489
C44 H59 O4	22108	29158	23037	9268	13554	21597	10657	21378	20114	11222	18182	15143	20108	26256	11647	25471	25556	18646	30392	16326	27579	13636	15797	36251	31863	19315	13446	37773	29094	33401	39312	20060	11893	22891	18322	10351	28279	38152	21324	12636	23677
Cyanopeptolin A Esi+ 7.0669994	56896	62357	52001	52361	64894	45750	54169	58614	18309	60934	54833	51139	16998	56686	50587	51679	62433	50442	18720	50240	57427	49747	48936	51416	61956	59860	58688	45543	21348	50388	57724	56004	49347	20397	51599	57674	53172	39968	58874	44719	24615
Aromatized deshydroxy-C-1027 chromophore Esi+ 1.2529994	11455	33902	30280	17503	17193	23221	22270	15871	24593	23631	22481	30609	29207	17758	14439	17101	28496	15660	29751	17426	26167	25556	10710	28854	22230	22309	16685	22929	27995	25327	20163	21416	13826	14983	9491	18398	21944	18981	19992	20109	20469
6-methyltetrahydropterin	38928	31787	38056	15412	35519	21697	26926	48158	26299	6933	53369	54929	41418	41949	42604	51996	20225	28045	32441	34368	57935	34264	31745	40559	56129	54626	44772	75087	34963	51612	53112	61862	56963	44645	76486	21934	48878	45627	22787	32632	53554
Physostigmine Esi+ 6.477998	10844	8771	22469	4960	4897	8422	16431	10162	6952	7564	13165	12693	12164	8508	14736	20190	6463	15118	21753	12485	12467	22884	9445	9642	17766	10240	13648	32380	8747	11841	11137	15469	25683	15019	18889	16300	6898	14693	6633	10723	15108
Sennoside A	34194	30066	37921	35496	25841	42290	39599	32194	31616	37382	34082	35967	36545	33515	36857	36737	39217	30681	35069	33213	32886	25762	38357	35379	37078	29377	34340	42176	31849	35557	33921	32767	31035	29125	30096	37511	31256	34608	17938	36111	32044
> limit Esi+ 7.296998	21241	11761	25723	20011	8835	20773	24391	16599	13242	20676	21562	21069	19634	17202	19770	31326	18579	17419	30938	18110	20298	16987	19782	15281	22004	15061	21355	34324	16593	14731	19188	20845	27931	14703	23016	21852	13951	20144	5147	17512	18991
dTDP-L-megosamine	22753	13931	29091	28083	8517	28539	21106	14113	21734	26463	24795	25778	25488	18711	18674	27356	21733	27586	30720	22637	24643	24974	29236	24170	27425	15494	22585	28488	23641	32139	24749	26031	26703	18584	25114	21568	16144	31652	4233	16455	19761
C38 H68 N3 O S2	20264	57712	26111	27953	13145	20314	21287	10697	16418	24001	15863	26448	51701	23968	24821	21598	24758	15042	21849	15894	18788	35734	22052	16706	50237	15336	22295	19356	53718	11221	17961	14357	22173	51995	22867	18333	17750	13282	41389	8946	15835
2-Aminoethylphosphocholate Esi+ 3.8809981	77402	78358	37154	52814	75949	79039	54364	74575	47232	68046	58687	54151	22446	67968	64161	74517	73704	74346	60401	69524	64125	44263	86312	55237	47612	26406	21464	39732	56129	48020	64682	37709	29199	125965	34116	77371	69894	73881	51018	43210	69620
> limit Esi+ 7.078002 :89	30797	25157	26084	25100	25087	24171	26159	23036	23844	27432	26908	24227	22662	21600	23619	25752	24771	23676	28178	25956	29313	26025	23930	26422	24500	23074	26746	21801	24050	21539	28226	26559	26846	28115	27115	30351	24885	23831	15217	25430	23974
C37 H13 N10 O3	26498	42296	28861	37396	38965	24093	28836	30173	26974	28311	34077	31863	24760	22951	23500	22967	36573	32973	31559	30660	34020	23376	23403	27241	23435	30776	33408	31239	34455	24532	24142	28889	22711	31907	32538	35761	22684	24702	33636	23256	34309
C35 H55 N9 O4	20551	34521	23151	25292	16241	14332	15820	14601	11873	12873	51578	34606	8794	16461	11788	15668	38610	14473	18065	11511	37844	27360	7434	13560	16084	26801	25064	19252	24671	15777	26950	29209	10800	12567	12481	12617	16252	13986	20884	13458	34691
5-Hydroxypentanoyl-CoA	35936	30665	34424	29775	27783	37137	36541	31088	29233	34967	33150	38424	36924	32155	32362	34747	37971	40836	31161	36934	35395	21028	34540	36736	36645	32264	29818	37029	33336	33965	32692	31519	29997	32992	32292	35138	32402	34381	23600	35302	34609
C35 H42 N5	27650	20839	26205	33742	31078	26000	24508	29440	31144	27833	37638	26844	28526	21673	33468	27501	25218	29464	25543	23474	33883	36822	39344	29197	21107	29577	28081	24113	34373	23623	24935	30095	26176	28926	23485	26337	24432	23616	38615	33344	25787
3'-Deoxystreptomycin 6,3''-bis-phosphate	29572	25485	30756	33970	29065	32203	31679	22443	23753	31368	28171	21208	29111	26747	31829	23170	31287	18420	30622	34223	25410	29052	26399	21820	27778	30903	15819	30013	28988	25398	25109	18035	25797	21197	24539	25651	24992	28318	26216	26087	31242
Flavin adenine dinucleotide (FAD) Esi+ 7.529001	28348	23326	26209	28545	20799	16876	28745	24792	21012	23537	27578	16689	33577	19740	28863	31274	24346	17493	32852	31742	25639	31417	29023	19557	14432	19540	12195	39758	28475	26717	24423	19498	28810	22412	28016	26850	22745	28155	19603	27391	25854
C31 H68 N11	16660	19956	23564	31893	18928	17148	19218	19334	14643	26932	19794	18401	15484	28428	24011	20568	27216	6247	21689	12747	30961	26323	22613	11057	7767	24282	12427	20941	13855	16486	23222	11406	20424	11926	26757	23415	20690	20175	16404	19956	23521
C16 H38 N10 O2	12552	19875	27061	28207	13076	16764	22710	11496	22547	21739	23894	17236	17949	18237	20073	10332	22557	20728	22259	30924	23288	28853	19294	23767	19010	12278	17149	16687	11328	17632	17712	18398	10963	19988	22132	19698	12557	14252	11262	16159	11002
PE(15:0/14:0) Esi+ 2.3160012	23450	31258	19431	15154	14405	7140	22790	31366	27860	18148	22608	15890	23557	14384	19604	37490	14711	21526	33530	23121	14721	24782	14368	19406	27752	17301	21762	48201	19728	28452	21828	23816	22461	31123	23548	23032	19686	27904	14432	19050	22892
> limit Esi+ 1.5559999	32941	16085	28917	14525	8385	25416	26605	14501	21065	12523	28437	19319	28115	21464	17424	22426	18463	17276	28279	19363	37548	30173	20503	32241	9728	25210	28485	22557	27209	15940	39254	23480	35675	6781	29792	39730	19513	42510	3608	30370	31965
Decabromodiphenyl oxide	9609	6693	12453	14217	4228	20461	12149	7851	22408	7256	11095	15415	29533	9752	15503	15664	2949	18782	22525	16408	13122	17768	14920	20480	4586	5520	11086	27798	13255	17758	12234	10926	16023	12003	13445	10615	15455	22082	5111	16813	12564
> limit Esi+ 6.9490023	24919	19438	23965	25140	20257	24171	22466	21276	23298	22971	24153	25612	20985	20041	22963	24404	21032	21276	26688	26637	24910	26923	23840	21158	23789	19077	21471	33850	19356	22715	23304	26493	22427	23755	26030	26695	22464	25170	12419	20142	25028
> limit Esi+ 7.291996 :88	35041	21686	34598	33656	16661	39636	31692	27116	32021	34565	32541	36895	36440	36063	33566	30721	34854	33079	26919	28045	29860	19744	36078	36110	29226	24986	32331	28939	27381	37515	29314	27814	26181	24347	28281	27326	31289	30271	9193	36380	30849
Moxifloxacin	21649	10791	28506	21477	12848	37842	19031	9218	20587	15941	22158	36834	27189	22152	27676	23593	11062	23088	23103	14644	20982	28936	25049	23643	11777	18985	27862	19240	20114	24480	19456	19831	28816	8572	26642	27118	24524	20436	4069	29868	21476
> limit Esi+ 7.1040025 :87	14251	7473	14311	18996	5836	26894	14783	9612	22746	7757	14527	19526	31026	12329	20840	22104	7326	21603	29077	18961	11853	21442	19894	19467	8322	7147	12026	27875	15712	23858	13847	12378	17804	10833	14866	16879	16163	25376	2900	21656	15010
Orobanchoside	19465	29873	12770	17773	19371	7840	18965	24157	10010	10691	12651	6424	6396	5655	12075	4601	10810	18695	5198	12498	11576	7623	12111	8715	7734	17180	5696	1848	12957	4138	10402	2761	7082	12077	7167	14463	3848	4996	14600	6098	12730
> limit Esi+ 1.2459995	77551	65890	61083	77259	72763	49090	63942	68243	70310	72659	66876	59904	65524	55532	53797	57844	62864	74464	78978	71523	48333	63813	61748	55777	63107	77426	61503	59168	63973	58607	72980	71697	64991	72327	52191	46486	70170	74895	43915	66945	84259
C48 H78 N3	33871	30418	32555	36248	31518	29016	28769	76628	32254	32500	25600	27128	26997	38812	28577	48857	33705	31851	27638	38759	29077	31163	24184	23319	19185	16607	36567	22114	23171	22198	32761	21036	31428	26326	26695	31747	46555	32181	20072	28543	34553
PE(20:0/18:3(9Z,12Z,15Z)) Esi+ 6.238003	54797	48537	54215	55289	52685	51217	49187	51952	37569	50628	48823	46573	46366	42484	47980	44530	46659	42601	44217	41940	42091	40339	41172	36202	38968	42648	39141	32560	35843	40185	40113	24664	39823	30100	37517	38610	42130	32606	36327	38296	39113
C12 H11 N8 O4	12199	10060	10575	12694	5986	5894	16384	10758	12187	9552	13806	5952	10545	1901	8067	24890	8194	9378	31520	18559	14293	18380	7388	6461	14860	7628	9828	29404	8475	7892	14549	17933	15592	15588	17622	19341	4567	23178	3100	6741	13091
C23 H19 N14 O11	25742	16540	26629	31906	11671	27899	25853	19302	20475	24767	24355	25589	29487	20781	26343	24592	23060	28518	24872	30292	26489	13914	24471	19920	22102	17528	22081	27860	22867	29820	24417	21294	23043	22801	26528	31004	27072	24078	8692	23941	25954
3'-Keto-3'-deoxy-AMP	42037	36489	20313	23867	33484	17992	41369	35481	28207	20100	39223	18916	23894	15163	38497	19596	35447	45300	31639	40564	34131	23941	16714	15408	16070	38329	14870	29015	32954	37824	37189	21939	42466	30974	33864	46097	16355	17149	31268	17043	21956
Disenecionyl cis-khellactone	19335	21618	12986	20090	17476	16954	22574	19463	17381	17425	20278	19705	26014	18058	20997	12831	18316	24540	17220	26700	18322	11768	19823	17572	11577	11982	12680	16025	16505	20295	18533	7671	16671	18478	12284	22127	16409	10742	11947	20906	14962
4-Prenylresveratrol	39584	11924	40597	15173	4057	25966	14095	9913	12980	8607	16489	15839	54218	20666	33424	64278	6997	32940	32259	23516	14329	18724	18797	23888	26220	12345	16034	26296	18872	27002	15526	18546	26092	12621	27413	13178	28717	34929	9692	30227	18504
Pfaffic acid	202963	178697	176916	187430	177662	175826	178063	171053	188670	190116	188290	162436	189359	192090	176439	174038	194239	173414	179034	189607	190474	174533	188807	177116	166541	169579	181463	177172	192268	177575	190464	165377	171334	188855	172148	178098	177276	172591	133369	172209	190573
Levofuraltadone Esi+ 9.161997	93381	38700	152441	83149	21332	75303	49030	32878	39416	60772	96550	72027	94398	69042	58203	218772	69383	59722	233854	46695	91519	169439	90522	54394	149710	110533	153833	248514	70473	60536	89752	170818	172560	57211	176719	48302	84114	220445	22148	42710	102547
<none> Esi+ 7.1779985 :86	22387	19252	15606	17340	17819	12249	19447	22683	21375	12676	21641	13309	10034	14680	15659	15734	15200	9008	133696	14294	16309	11585	13663	15859	16698	23251	13319	18790	11315	14858	18806	160233	14395	14271	15054	16199	16157	9897	179364	17983	158406
Guanosine pentaphosphate adenosine	26527	21308	26935	28251	24206	27151	26971	24321	26026	25735	28049	25314	25630	23527	25437	27569	25210	14715	29182	27976	26954	30558	23661	23131	22986	22831	26047	35390	24744	23717	22382	24313	28682	26881	26076	28218	27115	18347	12402	23535	25661
C19 H2 N3 O10 S	22366	18324	20520	25087	16792	23335	20264	19084	23986	20260	22495	22291	22946	18153	18593	22763	16975	19202	22832	18758	22462	23256	23143	19145	20060	16979	20371	27989	16393	21027	21413	21124	17813	20258	22946	20511	19246	22631	9633	18910	22821
> limit Esi+ 1.3909997	54426	54737	34111	44781	56486	49347	62884	51132	52327	40582	70540	57955	53903	47452	44662	63450	50337	66586	48329	46978	64632	50413	37199	51878	53753	37783	48155	38612	46840	46628	67402	49177	28593	35543	43399	42195	32058	50088	36891	39748	40010
2,5-Diamino-6-hydroxy-4-(5'-phosphoribosylamino)-pyrimidine	36767	27333	36814	38491	21618	37887	25883	26589	25831	29796	25837	30250	33241	30501	24288	27167	29448	33250	29299	24136	24700	26867	25243	32868	27890	26148	31537	32297	32047	31641	27717	25154	28598	20339	28253	27556	26831	26358	20710	31487	22789
Adenosine tetraphosphate	21686	15010	22869	25701	17566	23139	19786	19921	21920	21971	18453	17134	19689	20097	21167	24353	16005	19588	26268	21065	17802	22611	21865	19898	19032	18947	23609	26942	16476	20686	21437	19178	21216	23766	21904	25070	20554	19451	9253	19315	21769
> limit Esi+ 7.3220005 :85	29351	17645	31770	30136	14305	28699	30482	29506	26726	29150	25946	28186	31906	31168	30719	28718	28298	33400	23062	27383	27327	9432	31414	35250	32365	25660	29739	20525	26376	35557	28683	23982	23549	23917	23426	26989	31175	26722	10420	36600	31480
C15 H4 N5 O12	30952	18765	39588	42575	10834	34986	26360	34958	42740	32965	24122	31775	34860	44757	31378	36582	20631	24306	24360	35929	24469	39704	23886	27832	35649	28925	48231	22871	18128	34308	39112	44346	41567	32374	31402	43231	34372	29628	9564	47358	37444
C41 H67 N O S	73038	59610	45031	59088	69157	51547	58762	47302	61717	49104	52997	61199	57138	51858	53735	52580	48789	71217	53952	58395	54754	57070	48282	49667	59395	49174	55628	56776	61310	58970	54074	58698	53406	52661	50676	46045	50950	62206	46288	45814	54256
C43 H60 N O2	48735	29012	37227	45132	37506	34870	40905	28129	37786	33266	55921	38849	37135	32076	43554	44466	31736	52469	45199	36237	54389	33526	31717	35354	46239	40852	38763	38526	35620	36754	49217	38143	33429	33925	42571	40599	39618	39155	30112	43530	50068
Oleandomycin 2'-O-phosphate	19043	16408	13755	13160	14665	12170	16880	11453	11401	12025	19053	11489	15194	10255	12088	34843	11913	13708	9384	12189	15947	13101	10597	12063	10751	6056	10370	10074	14392	11586	16252	14139	11030	12631	13653	15732	10798	13022	4205	11762	17953
C9 H6 N6 O9	23415	18315	19794	21837	14302	22973	26132	19759	29979	18701	22357	18088	22896	18030	21077	24307	18252	18190	30722	24545	20949	21946	21822	20062	18543	12185	17052	32724	17907	19673	22261	21731	22014	28281	26240	20194	20042	24017	10778	16220	23148
Ritterazine A	29437	29420	32945	32458	27194	31874	30240	29020	31305	28042	31040	29481	29370	28857	30732	32428	28340	31030	30649	31084	32651	30932	30961	31594	30530	28782	29291	28772	30523	29671	30556	29995	31958	33755	32249	29499	28433	33415	16121	31067	33529
> limit Esi+ 7.2950006	25957	14500	29696	22397	10305	24862	26022	21726	23685	21714	26050	34534	22757	27223	28362	28489	29917	22141	25474	28122	26678	13919	29955	23826	30343	17370	22410	31908	22851	26283	27414	28227	21687	19926	22910	27187	25017	27263	7597	29420	30076
C25 H44 N5 O4 S	52016	51083	25370	29140	57234	15748	57706	42951	57087	40021	24243	23413	47912	10636	21951	25605	23617	34592	49579	59811	32857	21961	25586	14767	13231	31251	33638	34003	29929	19016	41890	32652	28932	51485	20137	45915	8714	21710	44578	13300	55529
Plantagoside	19385	13812	16091	25763	12285	33363	20717	15014	21772	21790	19382	30223	21339	21150	20200	15886	20975	24621	18591	25019	19451	19409	30318	24943	10074	10968	13823	17225	11109	21109	18541	13898	14238	13194	14098	18162	25122	20173	3651	22106	16606
CE(20:3(8Z,11Z,14Z))	14454	9458	15016	16869	4471	22466	14914	10567	22677	8231	16293	21588	32500	12500	16475	21996	6428	23727	27164	20888	15639	20128	21588	28248	9015	4448	13807	28054	16223	22644	18484	13596	19665	16583	16285	17647	18508	27709	2176	22241	15588
3-hydroxy-5-methoxy-6-prenylstilbene-2-carboxylic acid	22969	14856	16157	13944	14315	22607	19181	19662	28353	15812	14926	17759	20648	5623	16639	23713	13752	5429	18020	25321	19393	14479	16140	14625	13652	8436	14546	33944	11481	20161	18582	15646	14920	33998	13419	15021	17572	24534	12915	15078	20048
phorbol 13-acetate 12-myristate	37459	38759	36497	56106	68295	35686	56590	26143	36699	21961	37092	35868	57663	21833	37717	37527	37801	21608	65995	77855	56590	51042	73608	23075	71138	39572	54259	31613	23600	53863	39772	33263	69824	51853	66642	57038	19680	39149	32450	53687	53226
Dolastatin 10 Esi+ 7.1789985	208174	23815	17851	18471	32000	12851	188132	201627	17075	18299	20313	17419	12684	13781	16782	10809	23688	8518	12045	16796	14752	14167	14351	11676	198849	24718	197711	13087	14276	14976	211908	20719	11656	19231	20380	18160	12470	9459	34411	17219	18416
Hydrocortisone caproate	38329	53126	18719	41207	36877	25303	58637	44381	72316	34829	32413	24236	31202	15131	28721	10823	37236	33539	26322	56330	30006	17212	36462	19018	11616	12146	21762	17974	24113	27704	46409	19813	17491	56340	17669	48976	13956	17103	51159	18205	28342
> limit Esi+ 7.096998 :83	25515	20860	26748	28833	8088	34126	22535	20167	32093	22437	26147	27325	32817	26106	31491	28208	15845	33484	34170	31882	28287	31471	34047	33375	23117	19303	27927	33486	27785	33017	28809	25951	29091	28088	22200	27639	31336	31452	6907	26938	26835
> limit Esi+ 7.3250003	30035	22832	27781	31537	11281	33669	22438	26520	26715	31998	27811	32106	30341	31696	30815	26751	25027	34445	22676	29664	28140	9882	32305	32227	27868	26677	30031	21394	28265	37673	29745	25846	22331	26623	23015	29946	31685	28904	8487	32507	30597
Sclerosporin	11085	36033	22850	17736	21883	18804	23777	26495	23964	16373	12986	24076	25295	19553	30413	30375	16980	26808	21991	28134	13674	27495	25701	20861	18860	27194	35889	26137	20946	30002	13779	24044	22521	23317	21791	31264	25774	29050	21379	20120	13251
<none> Esi+ 7.1779985	22291	9832	13605	28935	11437	34925	21421	18687	29314	20396	12876	32698	32403	21046	26785	23728	12786	28378	29485	26790	22570	24714	33046	27596	7785	6801	8638	30438	22614	36385	21225	17636	22271	11009	18343	23944	15747	29170	11544	24471	20564
N2'-Acetylgentamicin C1a	21538	28272	27076	20738	34210	12251	20848	19382	16973	22404	21261	17269	24895	18283	19913	21075	20598	22425	16654	20206	20568	23441	22445	45930	20822	30388	18229	26271	24580	19557	20423	22266	24441	24850	19005	19006	22439	13336	17414	27508	22810
Cyclosulfamuron	30052	27325	29713	27820	26575	36273	29218	27814	27890	24471	33267	34528	29114	28139	33232	26593	30207	22432	29400	29782	32712	29705	30521	24589	26757	25568	27629	30977	27934	26132	32131	21772	25231	32432	27011	26749	29318	28856	15861	26684	31237
C49 H16 N4 O2	31825	19881	30568	37989	14165	43352	34560	25346	31380	32342	30080	39460	33437	34249	30908	30755	33435	26618	26592	28612	32037	20626	31725	35189	29427	27639	29844	29306	28870	34129	30678	27571	25165	24519	29118	26499	30755	28855	4508	36721	32065
<none> Esi+ 7.0919995	33951	23545	33065	31539	28849	32613	33237	30654	32284	29488	34086	32712	33956	32125	35738	35941	27632	33953	35910	36484	34194	35003	33293	34150	31246	31057	28276	37190	36420	35804	32168	33045	35335	33294	34577	30427	33542	35587	13773	32129	34957
> limit Esi+ 7.289998 :81	14592	9499	22997	12568	3088	10284	19048	9500	8504	10869	13610	15390	10409	8949	19200	27769	14803	15007	26302	14009	16396	12942	21693	9256	21375	15053	17026	34899	11264	8574	14520	18921	19606	12523	17587	15674	11485	17368	5487	11588	17276
<none> Esi+ 7.101 :80	17408	11626	18715	19852	9301	25593	17528	12443	25726	11308	16711	20663	34553	13897	21818	23667	11269	25579	28481	24374	18829	24170	24921	27013	11995	11035	16570	32475	20505	26826	17451	16429	22894	18493	19809	20101	19933	28776	5658	22988	17415
C28 H15 N5 O12	20990	30718	10478	34102	18258	33503	22243	29191	24836	28626	22161	33132	12545	21621	19446	6434	34900	13423	2250	23175	22626	10165	23375	16073	7447	7738	11031	7128	8690	25514	24229	2483	7519	29305	10868	26212	34233	4108	23304	23779	21198
C24 H55 N4 O5 Esi+ 1.2599994	24303	22493	22756	19304	24849	17946	28740	31680	32185	22810	26897	21739	27102	19555	20334	38017	20492	32493	31352	34965	24486	20348	26182	23859	18117	16931	24238	19787	25065	24118	22421	21427	22073	25001	13016	27942	25889	26892	14951	23652	21526
> limit Esi+ 6.9230013	28461	24952	29566	32788	24793	27218	28397	26327	28880	27241	31734	26443	27724	19121	29813	30919	24825	25348	36135	30902	29962	31420	29123	24634	25710	25743	26298	41932	22464	28403	29752	28930	29433	30141	30352	31501	27033	29813	13120	24308	29224
PE(24:0/20:3(5Z,8Z,11Z)) Esi+ 3.6029983	53170	103519	77917	80305	67442	14771	83817	87575	75902	86798	56093	34442	81270	14724	26984	37612	89002	76585	35259	77097	52877	43340	33429	48634	43864	50125	46320	19598	85399	78714	46967	46700	57208	73716	40179	76056	27210	29667	20415	68576	48118
> limit Esi+ 7.287 :79	32401	24188	33347	29851	16600	31054	33142	19422	26537	18586	31855	31036	23567	22873	25336	35563	20652	30767	38109	20349	33300	14256	39627	34174	32088	27681	34480	34036	25705	26505	34469	35091	28716	17600	33873	30026	31891	35061	13214	35660	36279
Glucosylceramide (d18:1/24:0)	25489	20170	24374	30735	16345	30799	27715	24760	28179	28111	27271	27917	32164	27925	31991	25019	30235	31696	17536	29523	24842	9779	28465	30249	24245	23175	24947	20691	28458	32870	28144	21651	22018	25731	25406	30386	30569	25699	12079	29263	28330
Integerressine Esi+ 5.535999	67967	25923	29813	38320	50830	30844	45538	74920	123544	25826	29216	25968	81272	44601	28665	24536	20500	72248	44038	42696	27398	32313	63745	44174	49691	42676	24607	38663	38244	25962	63172	45085	33316	108783	76230	107820	43900	60167	67904	23077	69202
Pyrazophos	865201	40868	908171	956725	45434	1244692	31659	43774	26735	794721	854705	1107433	953354	943333	905155	1036770	810593	852838	1060029	34124	32961	725550	31396	1052956	940212	640691	808111	1046224	29247	1158387	31082	902505	834923	37805	850045	708206	1119070	1076664	47111	1054559	843118
D-Urobilinogen Esi+ 5.5399976	87467	75942	62169	101835	67812	81953	121179	97874	133589	80960	82334	88806	105701	65913	95429	72920	60624	90234	52382	46329	80456	81287	90683	61484	63438	142668	62394	108524	60866	77061	81795	61370	39395	120692	80416	117393	66454	86196	100104	70396	87339
PE(22:5(4Z,7Z,10Z,13Z,16Z)/15:0)	62220	59456	42991	40596	50386	62650	42871	32788	38576	28697	45676	54253	55238	33961	24812	60889	53466	37134	47452	50155	37886	58212	29340	36142	54087	59809	46275	52882	12962	58906	54580	48110	53535	25309	23623	21291	60093	50599	41667	49031	63492
C22 H23 N2	96965	40326	52887	49775	53891	73861	47423	44602	39813	60121	65943	90784	41310	47560	43941	87016	49794	65714	66827	56342	64812	59478	60187	54698	48624	65093	53246	38987	69088	32600	65839	67472	55080	47082	36738	59044	46819	39378	34562	95928	87125
C19 H25 N18 O	32392	26424	26945	33866	32835	32094	29251	27470	30739	30425	29823	30894	36506	29483	24014	27179	27225	28724	34670	36328	30247	26507	26617	33095	32078	29970	25711	28655	32633	27706	32627	29120	30394	35078	28485	35142	29304	29867	17268	25298	33551
> limit Esi+ 4.515	268405	240541	65996	425268	309995	169683	420661	270859	465894	376789	151810	273058	365104	89531	354098	80192	346228	292382	341326	427538	118463	219675	213826	101241	64156	35116	49484	264348	149437	135596	136638	79006	180648	368948	170660	376658	101208	130282	71634	188094	263099
<none> Esi+ 6.803999	31377	31068	29732	31674	30033	31873	26298	29639	27119	31702	27645	30158	29752	31000	27179	28633	32758	30414	27964	30816	29419	26987	30009	29838	25023	28258	27877	26379	29277	25350	25486	25614	28143	30233	28037	29819	30684	25262	31422	28072	29960
> limit Esi+ 7.1020007	12525	5424	14440	16520	3910	22797	12941	4702	19927	6944	13916	22876	33265	12271	14628	17739	6886	20473	26558	18989	13665	19265	19517	24376	5765	5954	10761	30967	18763	24960	12545	8304	15592	16171	14867	15825	15535	25089	3735	21780	13631
C29 H20 N O10	20008	33593	15100	17822	28456	23854	22017	29978	28789	19192	33212	27524	24182	29563	28798	30953	27929	27836	22086	26425	29354	9741	27508	17616	19883	30906	20378	21427	29656	15481	25038	17204	15259	24006	21035	25783	29829	18822	36560	1444	29117
C35 H64 N8 O2	35004	25341	29411	40591	29913	31488	32273	25699	29156	36723	39199	27661	28690	35296	27958	30758	28093	31920	28192	26683	41668	26809	29071	26889	21497	26768	30955	37274	25878	26128	27904	20474	30013	29104	29857	29696	24318	33376	21722	28761	33885
C16 H43 N15	36866	38693	38897	35298	37006	39754	38850	36977	40061	32744	34379	33877	36751	35622	41164	33158	42102	37631	38000	33726	39442	39420	41212	35180	33550	36303	32192	32750	30738	39299	40363	33178	33038	39128	30152	32538	28892	36991	76550	37238	37012
PE(20:1(11Z)/15:0) Esi+ 1.2379999	41026	40552	46777	48288	35082	21057	44903	28407	35289	54712	53813	52056	37133	37403	43624	34399	42160	40691	47360	47877	47141	46419	56578	41573	41628	44969	38238	40465	37078	45243	51555	57429	45546	56086	51593	46554	36175	39670	32629	39534	55134
DG(22:0/18:0/0:0)	89501	125263	75250	55164	165083	20982	122209	118153	109982	107900	66570	111098	133644	90315	96857	189182	112414	125602	22927	119543	46324	76117	104853	117319	155770	153953	119454	66559	152007	144464	53420	89868	120562	114426	104694	127656	108970	118681	114394	122623	83813
C7 H14 N2 O4	16488	20166	17248	27620	10070	32274	13785	16939	21487	25312	14845	21376	21584	9764	30693	13003	16223	20108	27823	20522	18084	14917	32628	9256	10966	6611	14222	29149	13017	21009	19278	12284	17548	13084	19143	22607	15974	15995	5864	8162	13258
> limit Esi+ 1.2179996	39773	42046	39638	40806	38433	40153	42199	35699	40735	33477	38598	40642	42612	38354	40962	37672	35943	39963	35369	34436	37862	35516	41112	32540	39947	35503	35942	39753	40014	38925	38950	35680	30976	37866	38191	38723	36567	31269	35140	34817	34499
C27 H55 N4 O3	17816	18321	26286	31269	22509	24029	21707	11372	12191	15964	19293	24791	17303	37365	38283	14070	15990	23715	7610	3413	22863	16182	32189	12109	11675	19473	16186	18462	12747	19722	16150	8985	12690	14252	22236	28333	35280	9571	13889	13081	10086
> limit Esi+ 1.41	29744	24524	34003	43866	25522	32685	46875	35053	35263	40858	35320	30944	22785	29274	35570	27215	42818	26769	37093	34391	31810	29961	29730	20737	29110	14319	27503	35112	15331	33586	29770	31534	21766	37137	48999	34498	37962	41562	23625	28620	34657
> limit Esi+ 7.3189993	30050	27177	28106	34216	21141	37716	26186	30087	27288	32619	28217	32094	29025	33076	28145	20980	28100	28762	17551	27703	30974	8372	33408	38191	25669	30123	28429	17970	33068	37125	26873	22123	19049	21836	23657	27838	33369	28450	14917	30474	27432
<none> Esi+ 7.3289995	25839	11910	19051	26907	9586	28941	23650	18069	20829	21365	21244	22540	27493	20477	22754	20241	22626	25813	18544	26936	24360	8956	23342	23496	18636	16406	20938	20195	18893	27581	23701	19734	18415	19462	23350	23367	26156	25974	4099	23725	23744
Spiramycin 1 Esi+ 7.1759977	17876	20417	13268	194390	17991	10844	11831	16487	12050	196752	17335	12484	10559	18132	11927	185861	184924	12538	7643	15514	18057	11218	10397	15200	19182	25752	19306	8967	18259	12436	17879	15995	13472	17103	13934	15351	12531	11501	167352	12291	13184
C19 H40 Cl N9	46016	44967	42459	34136	36307	48087	35622	27273	37332	36892	33035	46932	31090	31917	36589	48791	34622	39431	43535	62654	34101	39716	34917	35176	29010	57443	34732	31613	36500	27184	29062	26441	42252	28877	44371	38510	37788	20474	17642	27123	22503
Demethyllactenocin	25499	15727	24207	41853	23462	29694	29891	23371	35584	30654	28206	21030	35532	19682	34900	25540	27433	35913	40627	35588	28655	26178	31402	22753	15637	11096	17742	29935	30881	28496	23198	19478	21812	33797	23113	34991	21928	26521	13410	25414	23292
> limit Esi+ 7.291996 :78	28896	22502	33079	30530	17141	33944	30527	24646	28264	28424	31050	35462	32469	23607	33427	24939	31188	30458	32375	27816	25322	17212	33270	29000	27804	26842	30565	29416	27788	31454	26062	28703	26406	23438	21772	24491	27327	31527	9320	36887	26189
PIP(18:2(9Z,12Z)/18:0)	27458	30644	33422	26165	15627	26490	23418	25236	24712	33629	27294	26906	21210	18597	19601	33810	24407	19948	45069	35703	27125	36316	24242	25130	30342	23877	26538	38854	13064	20153	25278	38487	33111	24860	29418	23903	24251	33364	7662	26081	25306
> limit Esi+ 7.061999 :77	27291	27813	20478	29205	27841	10575	28937	31154	13305	29989	27789	23650	15394	23349	15432	26694	26944	24499	23123	27337	26081	20766	24757	17894	27343	33830	23744	12405	24806	14724	22291	31685	22070	25078	30108	26764	14124	13386	31420	21323	18850
N-a-Acetylcitrulline	40514	33300	44972	31246	27766	36957	37993	29531	29392	29842	38548	32967	49095	33599	43092	57699	26538	36335	59563	32252	41194	48667	38371	38024	40117	36751	45321	53161	42499	47443	39369	49535	46232	40459	43695	36286	34699	56309	23195	45921	41096
> limit Esi+ 7.2109995	50700	38535	49192	58497	39001	63314	47478	44925	20633	49523	49690	62206	52404	51592	59535	48355	30286	53027	49402	51894	50535	25919	57824	51721	37705	34591	44920	62260	47189	54813	24475	43351	50673	47529	44489	22496	54189	20949	23917	25856	24584
3-(ADP)-2-phosphoglycerate	29208	4166	10293	18636	10628	17871	13976	8082	5688	11372	28339	15387	5124	9219	14645	27913	18636	34698	21795	8512	28297	28530	10671	11493	20466	17479	18832	11848	8475	4920	29940	17288	6003	5502	9148	14366	12861	8174	10800	23662	29283
> limit Esi+ 1.3839997	84307	62234	75675	66979	60395	69240	88436	45315	87634	80825	80708	51823	81204	54129	73528	76545	59063	64499	63620	78981	82770	80043	56514	66620	79470	71405	73012	87356	68137	53738	76495	79907	74289	84728	119572	69658	69275	89496	56957	54070	77382
3-hydroxy-sebacic acid	251062	6903	227423	756055	5956	2081351	27010	6995	142825	592163	291832	1454999	34725	321707	81099	72390	610308	242677	31605	80531	311806	3448098	831690	153152	11179	227469	90001	21711	16425	27621	311188	16101	54988	14660	44572	28084	165948	58575	1172	66305	303649
C23 H45 N6 O2	72230	52066	53930	54177	45512	58411	68318	50061	35303	62039	55842	56163	41643	40581	59144	43195	41907	43467	62535	66354	52282	68373	56438	49024	50428	41624	59582	62213	43625	49939	69291	48303	46162	51338	37659	64884	56215	53594	32414	52371	53110
C21 H15 N O25	31588	3083	9486	17220	10840	18856	14475	3522	7166	12655	26966	15189	6838	9747	10967	26067	18551	35181	22435	8742	25811	21541	10577	12267	16124	17178	17015	8169	8230	5716	28867	11990	6766	4305	6744	13713	13545	8513	13433	25454	29004
DG(18:3(6Z,9Z,12Z)/20:4(5Z,8Z,11Z,14Z)/0:0) Esi+ 7.1759977	22745	30390	18166	18073	30561	15044	20237	27254	18983	20452	18803	19454	16979	23699	20753	18717	28459	20374	16962	21103	20946	14470	16176	19473	198798	23810	21877	15287	20747	19590	22285	19441	19681	22886	22132	22104	18370	15717	35981	18709	23096
C22 H47 N	31438	44634	26333	11279	32960	6923	24078	28307	28469	29208	8659	7804	33270	11248	13289	27239	25575	6461	30457	6168	35601	30502	15718	13067	29773	7621	30114	32023	30663	8007	32184	5681	7438	6813	28228	30012	11494	3956	30907	6241	32558
Glucosylceramide (d18:1/16:0) Esi+ 7.177001	24365	24900	18701	18254	232117	13272	18173	26657	19598	25972	20046	19154	15165	22047	19791	19937	29080	18427	15211	18791	23162	16910	17199	19946	224933	32872	24107	15755	24936	19732	20417	22981	19477	24805	19133	20551	22958	18223	184643	20860	24639
> limit Esi+ 1.3149997	80559	50276	57949	71826	61543	71475	67235	43353	57771	68992	67430	60943	58414	66239	64581	66083	72323	79047	73128	48433	74898	71213	58274	56079	63932	67560	65469	48112	51596	52002	70024	61207	58683	42078	53214	66333	58477	61288	46065	57207	66759
C24 H19 N2 O11	28423	19088	41884	29255	30906	38326	27159	10248	28163	23163	30124	37391	34373	35286	36556	32555	31007	32288	29971	22725	30114	41125	38114	26101	24598	41194	39447	25259	28196	33601	28318	31232	35639	17197	40885	30199	36950	26871	17915	30852	30184
C21 H41 N12 O3	94278	91508	74228	206138	103074	102378	172705	119508	121107	191657	94814	109804	77484	72225	108042	105717	186528	99017	114666	156744	84833	88104	104339	80134	47183	26912	69302	59995	74429	121734	97025	60107	65715	106550	65886	171131	84351	121590	60645	81421	86057
C24 H25 N O10	32554	17845	30875	31862	21889	34301	24151	15355	27492	24012	30545	32177	31674	32683	33284	32045	25839	33717	27536	25868	28823	35091	29050	23621	21814	26472	32523	23808	29071	31134	30487	28506	33999	12505	33694	23903	32410	25592	8380	29273	28319
> limit Esi+ 1.2389995	25918	28964	31108	33422	31189	31056	30466	23191	35184	32406	24644	29036	31173	27686	30746	20778	35639	26036	27612	31490	26992	31305	25458	30208	33864	26014	26106	28526	28616	28974	26867	24963	25212	28830	23783	24639	25726	25478	26336	24988	27997
Actinorhodin Esi+ 7.2940035	27425	15741	33326	32285	11395	41769	32449	22096	27294	27323	29319	40308	32347	33477	33013	36651	30800	31880	32942	27900	31051	21926	36297	36628	34637	20758	28023	39079	25602	36929	28177	31479	28715	25191	31045	27097	34738	32985	6102	57815	30730
DG(22:6(4Z,7Z,10Z,13Z,16Z,19Z)/15:0/0:0)	47139	31270	51629	50998	41785	34957	42996	21628	23894	41408	42766	44458	24924	25803	37171	22738	36456	28207	36951	23510	35472	55069	36853	26755	35599	45333	57933	25359	18715	20158	23917	40376	50323	45181	62797	35848	20715	31798	35800	29501	29047
C52 H63 N	24138	17142	30339	17064	11342	11348	6454	15792	19535	16128	23966	15103	20343	18151	13558	51582	10050	19572	65264	5092	23460	42811	13232	14729	30749	82818	29597	42933	12642	17943	17378	48379	27732	17294	28208	17414	14257	87013	11199	5754	27894
> limit Esi+ 7.1060004 :76	19392	8682	24633	21875	5140	40008	17557	7171	33749	9481	17953	33940	53175	20796	21982	29740	3763	37868	40184	27500	16645	27974	34075	33787	7453	9462	20699	49713	26618	36710	19695	17270	25229	16657	19974	21445	25378	39340	2480	32880	17110
Myriocin	83349	65358	55718	65963	34183	51884	52739	55190	58523	28337	58607	43618	44206	70648	40343	58464	45880	40401	68673	43124	44359	47997	60813	67580	59239	35555	42995	55731	51620	55060	42799	47668	56117	52623	54173	40325	49114	45186	49621	59004	38286
> limit Esi+ 7.093998	38722	33327	45105	40573	28668	42023	39368	32189	38657	27911	37634	43058	44586	36502	38393	41453	30708	41378	49003	40610	38542	42921	41703	40830	31401	29672	34713	47170	38082	40310	39102	35148	41586	41241	37810	40715	39281	45099	17853	41880	41730
> limit Esi+ 7.067997 :75	66120	74731	63908	62047	77670	57215	60934	73022	21656	69609	67201	62135	22516	68777	26702	63221	73880	26434	53601	63990	69329	23619	56453	62193	74492	75359	68485	55134	67450	24517	68046	70162	60742	30688	29275	64501	64052	23499	67240	60395	29525
C20 H21 O	18394	17601	13740	20605	15764	14783	26595	15290	27811	12137	20390	12076	13206	15730	18852	19146	17402	19057	17541	25789	14533	12168	11105	11997	19133	62082	43096	18760	17913	16051	17959	15992	13688	20167	8751	21658	23001	21254	12546	20621	14393
[truncated: 1,302 more rows]

## Sheet: Neg
NW-MRC Id	QC-neg-1	1	2	3	4	5	6	7	8	9	QC-neg-2	10	11	12	13	14	15	16	17	18	QC-neg-3	19	20	21	22	23	24	25	26	27	QC-neg-4	28	29	30	31	32	33	34	35	36	QC-neg-5
[truncated: 1,241 more rows]
