# Supplementary material for: Age- and Genotype-Specific Effects of the Angiotensin-Converting Enzyme Inhibitor Lisinopril on Mitochondrial and Metabolic Parameters in <em>Drosophila melanogaster</em>
Source: Preprints.org preprint supplement (doi:10.20944/preprints201810.0133.v1), 2018-10-08
Supplement: Supplementary file 7 [file Supplementary Table 4.xlsx]

## Sheet: Panel A
Ionization Mode	Metabolite	AveExpr	P.value	FDR
Negative	Halstoctacosanolide A Esi- 1.6139994	15.1011	7.19321e-21	6.58898e-18
	Halstoctacosanolide A	15.3124	3.32106e-20	1.52104e-17
	limit Esi- 1.6129997 :2	15.6195	5.79257e-19	1.76866e-16
	PE(20:3(5Z,8Z,11Z)/20:1(11Z))	16.7746	3.56487e-18	7.87393e-16
	PE(20:1(11Z)/20:3(5Z,8Z,11Z))	16.8885	4.29799e-18	7.87393e-16
	LysoPE(0:0/16:1(9Z))	20.094	6.19061e-18	8.11212e-16
	LysoPE(0:0/16:0)	18.6723	6.19922e-18	8.11212e-16
	LysoPE(0:0/16:0) Esi- 4.75	18.4097	7.9607e-18	9.115e-16
	PG(16:1(9Z)/16:1(9Z))	20.0763	1.28693e-17	1.30981e-15
	LysoPE(16:1(9Z)/0:0)	19.7495	4.54557e-17	4.16375e-15
	limit Esi- 1.6129997	17.0541	5.02088e-17	4.18102e-15
	3a,4b,7a-Trihydroxy-5b-cholanoic acid	17.2843	7.56806e-17	5.77695e-15
	N-[4-(5-Nitro-2-furyl)-2-thiazolyl]acetamide	14.4318	9.8849e-17	6.96506e-15
	cis-4-Hydroxy-D-proline	14.7346	1.20813e-16	7.90465e-15
	Apholate	14.3729	2.73753e-16	1.67172e-14
	Cellopentaose	16.2885	3.43694e-16	1.96765e-14
	C16 H30 O2	23.3395	3.76406e-16	2.02816e-14
	16-hydroxy hexadecanoic acid	23.3484	4.09267e-16	2.08272e-14
	N-Formyl-L-glutamate	19.2426	3.728e-15	1.79729e-13
	N-Formyl-L-glutamate Esi- 7.2530007	19.2448	4.31109e-15	1.97448e-13
	limit Esi- 1.6119998	15.005	4.71865e-15	2.05823e-13
	C29 H48 N14 O3	15.9067	5.66127e-15	2.35715e-13
	L-Glutamate	17.9333	7.77806e-15	3.0977e-13
	di-trans,poly-cis-undecaprenyl diphosphate	15.286	1.29454e-14	4.94083e-13
	8-Hydroxypurine Esi- 7.7530003	17.8766	1.73609e-14	6.02046e-13
	2,2-Dibutyl-3-(4-methoxyphenyl)-4-methyl-2H-1-benzopyran-7-ol acetate Esi- 1.5979998	17.4763	1.8078e-14	6.02046e-13
	Laminaribiose	17.3742	1.87313e-14	6.02046e-13
	2,2-Dibutyl-3-(4-methoxyphenyl)-4-methyl-2H-1-benzopyran-7-ol acetate	17.4722	1.90525e-14	6.02046e-13
	Methyl 2-(4-isopropyl-4-methyl-5-oxo-2-imidazolin-2-yl)-p-toluate	17.3741	1.90604e-14	6.02046e-13
	DG(18:4(6Z,9Z,12Z,15Z)/22:6(4Z,7Z,10Z,13Z,16Z,19Z)/0:0)	21.0017	2.21551e-14	6.76469e-13
	C20 H12 N9 O10	14.7597	3.60344e-14	1.03826e-12
	Theobromine Esi- 7.7539988	19.0454	3.6271e-14	1.03826e-12
	2-Hydroxy-6-oxo-(2'-aminophenyl)-hexa-2,4-dienoate	17.5786	5.13936e-14	1.42656e-12
	1-Methylinosine	18.8673	5.94338e-14	1.60122e-12
	Gardenoside	16.8653	6.31574e-14	1.65292e-12
	Purine Esi- 7.75	18.8185	8.22706e-14	2.09333e-12
	Theophylline	18.9666	8.57932e-14	2.12396e-12
	6-Acetyl-D-glucose	16.7193	1.07357e-13	2.58786e-12
	Nagilactone C	14.9101	1.22291e-13	2.87227e-12
	Nagilactone C Esi- 7.7230015	14.9287	1.46599e-13	3.35711e-12
	C26 H14 N5 O15	13.7083	1.60699e-13	3.59024e-12
	2S-hydroxy-octadecanoic acid	23.6026	3.42576e-13	7.47143e-12
	limit	17.9185	3.63947e-13	7.75291e-12
	C34 H68 N3 O3	17.7844	3.87533e-13	8.06773e-12
	C52 H63 N2	14.4962	4.3594e-13	8.87381e-12
	Oxethazaine	14.0771	4.60292e-13	9.16581e-12
	limit Esi- 1.6139994	16.4855	5.24602e-13	1.02242e-11
	Kainic acid	14.8195	5.49215e-13	1.0304e-11
	Fucofuroeckol B	15.8174	5.51199e-13	1.0304e-11
	C31 H19 N19 S	15.2594	5.71513e-13	1.04701e-11
	C25 H40 N4 O18	15.8219	6.08981e-13	1.0595e-11
	PE(22:1(13Z)/20:4(5Z,8Z,11Z,14Z))	13.7054	6.10393e-13	1.0595e-11
	MID66857:alpha-Galactosyl-(1-6)-alpha-galactosyl-(1-6)-alpha-galactosyl-(1-6)-alpha-galactosyl-(1-6)	15.7726	6.13029e-13	1.0595e-11
	PE(18:3(9Z,12Z,15Z)/18:1(11Z))	17.1692	6.55159e-13	1.09197e-11
	C19 H20 O12	18.7534	6.55659e-13	1.09197e-11
	C34 H66 O4	18.9651	6.73513e-13	1.10167e-11
	Lauric acid	20.1427	9.86482e-13	1.58529e-11
	Bacterio-chlorophyll b	14.1588	1.02607e-12	1.62048e-11
	limit Esi- 1.5940008 :35	14.0113	1.29496e-12	2.01048e-11
	9-Fluoroprednisolone	13.6172	1.67893e-12	2.56317e-11
	2,2-Dibutyl-3-(4-methoxyphenyl)-4-methyl-2H-1-benzopyran-7-ol acetate Esi- 2.431	15.1847	1.94862e-12	2.92613e-11
	trans-Zeatin	18.247	2.0304e-12	2.99976e-11
	C33 H54 N11 O4	15.6283	2.06805e-12	3.00688e-11
	PE(18:2(9Z,12Z)/18:3(9Z,12Z,15Z)) Esi- 2.3460004	14.9664	2.16384e-12	3.09699e-11
	LysoPE(0:0/18:1(11Z))	20.6652	2.67333e-12	3.71455e-11
	PE(18:2(9Z,12Z)/18:3(9Z,12Z,15Z))	14.9656	2.67643e-12	3.71455e-11
	Octadecanedioic acid	16.9515	2.81871e-12	3.85363e-11
	PI(20:4(8Z,11Z,14Z,17Z)/16:0) Esi- 1.2560004	16.2802	3.43514e-12	4.62733e-11
	Dolichyl diphosphate	13.2638	3.68711e-12	4.89477e-11
	Batyl Alcohol Esi- 1.3300008	14.5821	4.00796e-12	5.2447e-11
	C32 H62 O4	18.5047	4.39704e-12	5.67281e-11
	C25 H52 N22 O2	17.2528	9.21735e-12	1.17265e-10
	limit Esi- 4.7409983	16.1905	9.9974e-12	1.25447e-10
	C5 H5 N2 S	22.3407	1.13633e-11	1.40659e-10
	PE(20:0/18:3(9Z,12Z,15Z))	17.8359	1.15284e-11	1.408e-10
	Pantetheine	15.6071	1.34404e-11	1.61992e-10
	Lactoyl-CoA	14.3111	1.81262e-11	2.15631e-10
	C23 H28 N O2	14.6901	2.26826e-11	2.66375e-10
	PE(18:1(9Z)/18:3(9Z,12Z,15Z))	17.6009	2.46895e-11	2.86273e-10
	C14 H18 N2 O18	13.5084	3.07177e-11	3.51718e-10
	7-Methylxanthine Esi- 6.9859962	16.4112	3.16143e-11	3.54834e-10
	9-heptadecylenic acid	19.364	3.17646e-11	3.54834e-10
	allopurinol	18.5136	3.53121e-11	3.8971e-10
	Gallotannin	14.6625	3.98684e-11	4.34755e-10
	2-Hydroxymyristic Acid	19.1268	4.48773e-11	4.83619e-10
	C4 H3 N2 O3	17.8482	4.57993e-11	4.87816e-10
	4-(2-Amino-3-hydroxyphenyl)-2,4-dioxobutanoic acid	14.816	4.8563e-11	5.06665e-10
	C19 H21 N4 O20	14.5002	4.86752e-11	5.06665e-10
	Gemcitabine	19.5249	6.33793e-11	6.52308e-10
	LysoPE(0:0/14:0)	15.1749	6.57302e-11	6.68988e-10
	PE(18:3(9Z,12Z,15Z)/22:0) Esi- 2.2089999	17.3178	6.96343e-11	7.00934e-10
	Batyl Alcohol Esi- 1.3300008 :27	14.9372	7.73466e-11	7.70103e-10
	LysoPE(0:0/14:0) Esi- 4.8890023	15.4356	8.69899e-11	8.56804e-10
	D-Sorbitol Esi- 6.4439993	17.4602	1.03246e-10	1.0061e-09
	MID73251:6-[2,3-Dihydroxy-1-(hydroxymethyl)propyl]-1,2-dihydro-7-hydroxy-9-methoxy-cyclopenta[c][1]b	14.7037	1.23173e-10	1.18765e-09
	Synaptolepis factor K1	14.2789	1.25548e-10	1.19794e-09
	Dehydrotremetone	17.3231	1.31206e-10	1.23902e-09
	LPA(0:0/18:0)	17.932	1.36991e-10	1.28044e-09
	Tricosanamide	13.5172	1.65517e-10	1.53145e-09
	Cassaidine	13.8056	1.68924e-10	1.54734e-09
	D-Sorbitol	17.2947	1.80022e-10	1.63268e-09
	Flaviolin	14.9672	2.62242e-10	2.35503e-09
	Oxydeprofos	15.1201	3.26331e-10	2.90213e-09
	3-Fluoro-D-alanine	15.2754	3.52411e-10	3.10393e-09
	limit Esi- 4.7420006	13.7499	3.71636e-10	3.24209e-09
	C17 H20 O20 S	14.8149	4.48373e-10	3.87462e-09
	C17 H34 N3 O	14.9708	5.76104e-10	4.93188e-09
	Diosgenin	17.8234	6.19723e-10	5.25617e-09
	PE(18:3(6Z,9Z,12Z)/18:2(9Z,12Z))	15.5501	6.39856e-10	5.37714e-09
	limit Esi- 1.5940008	14.0217	6.49848e-10	5.41146e-09
	LysoPE(0:0/14:0) Esi- 1.6109998	15.2786	6.81525e-10	5.62412e-09
	PA(16:0/16:0)	16.9298	7.09367e-10	5.80161e-09
	10,16-dihydroxy-palmitic acid	13.6913	7.92296e-10	6.42251e-09
	Purine	18.8383	8.67927e-10	6.97387e-09
	8-Hydroxypurine	22.0215	1.06714e-09	8.49999e-09
	Hydroprene	14.6369	1.26244e-09	9.89358e-09
	Chartreusin	14.5244	1.2637e-09	9.89358e-09
	limit Esi- 1.6109998	16.3362	1.29934e-09	1.00864e-08
	PG(18:2(9Z,12Z)/18:3(6Z,9Z,12Z))	17.5167	1.39591e-09	1.0745e-08
	C25 H30	12.9539	1.41903e-09	1.0761e-08
	PE(18:3(9Z,12Z,15Z)/22:0)	17.1452	1.42149e-09	1.0761e-08
	PG(16:1(9Z)/18:2(9Z,12Z))	21.3756	1.53477e-09	1.15233e-08
	Lithocholic acid taurine conjugate	13.6224	1.56066e-09	1.16225e-08
	(2'S)-Deoxymyxol 2'-(2,4-di-O-methyl-?-L-fucoside)	20.8824	1.7548e-09	1.29629e-08
	PE(14:1(9Z)/18:1(9Z))	17.2065	1.80734e-09	1.32442e-08
	Benz[a]acridine	14.3063	2.14546e-09	1.55971e-08
	LysoPE(0:0/18:1(9Z))	20.428	2.21429e-09	1.59708e-08
	Synaptolepis factor K1 Esi- 1.4109995	14.2855	2.25058e-09	1.60923e-08
	C20 H30 N9 O17 Esi- 8.3930025	15.1929	2.26628e-09	1.60923e-08
	limit Esi- 4.7579994	15.9951	2.32272e-09	1.63663e-08
	C24 H37 N9 O	15.783	2.54283e-09	1.77804e-08
	C15 H33 N6	14.6358	3.07542e-09	2.13416e-08
	LysoPE(20:1(11Z)/0:0)	18.2232	3.12646e-09	2.13733e-08
	C18 H10 N6 O17 S	14.6806	3.12666e-09	2.13733e-08
	Nelfinavir Esi- 5.432999	16.0099	3.6691e-09	2.48955e-08
	Nirvanol	15.5335	4.37125e-09	2.94417e-08
	LysoPE(0:0/22:2(13Z,16Z))	17.7162	4.57473e-09	3.05872e-08
	4-Hydroxyhexan-3-one	14.415	4.8281e-09	3.20474e-08
	limit Esi- 1.6119998 :11	14.9306	4.87382e-09	3.21181e-08
	C15 H13 N O6	23.5493	5.23121e-09	3.42271e-08
	C22 H34 N O3	15.1892	5.41586e-09	3.51839e-08
	2-Amino-3,7-dideoxy-D-threo-hept-6-ulosonic acid	21.9545	7.03261e-09	4.53653e-08
	C21 H44 N3 O2	14.3261	7.64678e-09	4.89822e-08
	CAI-1	16.277	7.76576e-09	4.93989e-08
	Estriol 3-sulfate 16-glucuronide	15.8122	8.26971e-09	5.22418e-08
	Doxazosin Esi- 7.7769995	18.8543	8.86807e-09	5.52596e-08
	Doxazosin	18.8543	8.86807e-09	5.52596e-08
	N-Methyl-D-aspartic acid	17.1886	9.33243e-09	5.77602e-08
	L-beta-aspartyl-L-glutamic acid	20.9291	9.79292e-09	6.02035e-08
	Cellotetraose	17.4045	1.153e-08	7.04097e-08
	7-Methylxanthine	16.5067	1.25111e-08	7.49028e-08
	Phenylamil Esi- 7.201001	18.1038	1.25111e-08	7.49028e-08
	Phenylamil	18.1038	1.25111e-08	7.49028e-08
	3,6-Anhydroglucose	16.9789	1.29306e-08	7.69117e-08
	C29 H48 N14 O3 Esi- 1.3499994	15.4258	1.41886e-08	8.38502e-08
	Allantoate	16.4323	1.52506e-08	8.95482e-08
	L-Glutamate Esi- 7.197999	17.5128	1.54819e-08	9.03277e-08
	DG(15:0/16:1(9Z)/0:0)	17.9465	1.86284e-08	1.07998e-07
	Cellotetraose Esi- 8.834999	17.3524	1.8837e-08	1.08375e-07
	Pateamine Esi- 5.4120016	14.6235	1.89302e-08	1.08375e-07
	C19 H2 O7 S2	15.2184	1.99815e-08	1.13683e-07
	O6-Methyl-2'-deoxyguanosine	16.4679	2.3342e-08	1.31983e-07
	LPA(0:0/18:0) Esi- 2.3880002	15.5757	2.77107e-08	1.55724e-07
	C25 H45 N14 O3	12.8623	3.08014e-08	1.71554e-07
	Bakankoside Esi- 4.686001	16.0405	3.09022e-08	1.71554e-07
	limit Esi- 1.6109998 :12	14.8197	3.24428e-08	1.79022e-07
	C22 H35 N10 O4	14.7063	3.51789e-08	1.92957e-07
	Flumequine	16.2681	3.54013e-08	1.93021e-07
	Azocyclotin	16.6619	3.57658e-08	1.93855e-07
	PIP(18:1(11Z)/16:0)	13.3099	3.6212e-08	1.95119e-07
	N-Acetyl-L-Histidine	13.6041	4.0661e-08	2.1781e-07
	GW1843	18.6521	4.12641e-08	2.19756e-07
	C22 H8 N2 O20 S	13.5835	4.31108e-08	2.28263e-07
	XV638	14.7428	4.48191e-08	2.35944e-07
	XV638 Esi- 5.2319984	14.7414	4.52289e-08	2.36741e-07
	XV638 Esi- 5.2319984 :36	14.7401	4.75336e-08	2.47391e-07
	(-)-Epinephrine	16.5731	5.3274e-08	2.757e-07
	C21 H32 N5 O21	14.6483	5.3676e-08	2.7622e-07
	DG(16:0/16:0/0:0)	14.7309	5.61983e-08	2.87584e-07
	C20 H30 N9 O17	15.2829	6.05562e-08	3.08164e-07
	C28 H18 N16 O7	14.8622	6.94414e-08	3.51427e-07
	C19 H43 N6 O7	14.7136	7.75169e-08	3.9014e-07
	Enalkiren	14.0911	8.68695e-08	4.34822e-07
	GW1843 Esi- 4.0240006	18.8593	9.70148e-08	4.82965e-07
	C13 H16 N10 O7	15.5398	9.88534e-08	4.89458e-07
	Phosphatidyl glycerol	15.1499	1.09337e-07	5.35663e-07
	L-beta-aspartyl-L-glutamic acid Esi- 3.8150012	17.2542	1.09355e-07	5.35663e-07
	C15 H26 N3 O7 S2	15.5599	1.12423e-07	5.47764e-07
	PE(18:1(11Z)/14:1(9Z))	16.8768	1.21329e-07	5.88027e-07
	O6-Methyl-2'-deoxyguanosine Esi- 6.1170015	16.4252	1.22238e-07	5.89318e-07
	11-Deoxocucurbitacin I Esi- 5.3450007 :4	16.4546	1.24873e-07	5.9266e-07
	11-Deoxocucurbitacin I Esi- 5.3450007	16.4546	1.24873e-07	5.9266e-07
	11-Deoxocucurbitacin I Esi- 5.3450007 :14	16.4546	1.24873e-07	5.9266e-07
	11-Deoxocucurbitacin I Esi- 5.343998	16.4545	1.26188e-07	5.95815e-07
	C21 H50 N13 S	15.7818	1.3022e-07	6.11699e-07
	C7 H17 N4 O4	14.3891	1.39247e-07	6.50765e-07
	Tetracycline	17.2779	1.42811e-07	6.64035e-07
	C6 H14 N2 O2	16.1563	1.49203e-07	6.90185e-07
	DG(15:0/18:1(9Z)/0:0)	18.7023	1.49942e-07	6.90185e-07
	limit Esi- 1.6129997 :0	16.9675	1.55646e-07	7.12858e-07
	Equilin sulfate	16.2888	2.19422e-07	9.99953e-07
	limit Esi- 4.675002	14.797	2.44663e-07	1.10946e-06
	Deoxyguanosine Esi- 3.691572	18.0306	2.95972e-07	1.33552e-06
	Deoxyguanosine	18.0348	2.97918e-07	1.33771e-06
	Phloionolic acid	15.2264	3.28454e-07	1.46763e-06
	(+)-?-Tocopherol	13.3889	3.48415e-07	1.54926e-06
	all-trans-phytofluene	14.7198	3.63171e-07	1.60707e-06
	16-hydroxy hexadecanoic acid Esi- 4.8049974	15.3775	3.94529e-07	1.73744e-06
	C36 H35 N2	14.0232	4.06256e-07	1.78053e-06
	Myristic acid	21.5635	4.20543e-07	1.83437e-06
	nonacosane	13.6511	4.3047e-07	1.86877e-06
	C21 H49 Cl N10 O6 S2	15.82	4.47042e-07	1.93156e-06
	C30 H42 N12 O	13.8047	4.99183e-07	2.14672e-06
	Ethyl isovalerate	15.3973	5.07181e-07	2.17093e-06
	12-Hydroxydodecanoic acid	14.8468	5.5342e-07	2.35783e-06
	Inosine Esi- 5.2400017	21.0024	5.73019e-07	2.43002e-06
	Inosine	21.0315	5.85453e-07	2.47131e-06
	Ricinoleic acid	15.2614	6.05637e-07	2.54479e-06
	DG(22:6(4Z,7Z,10Z,13Z,16Z,19Z)/20:5(5Z,8Z,11Z,14Z,17Z)/0:0)	15.6971	6.34578e-07	2.65422e-06
	16alpha,17alpha-Dihydroxyprogesterone acetophenide Esi- 1.5950005	18.0582	6.39143e-07	2.66116e-06
	16alpha,17alpha-Dihydroxyprogesterone acetophenide	18.0577	6.54403e-07	2.71237e-06
	PA(16:0/18:1(9Z))[U]	15.7436	6.75781e-07	2.78836e-06
	Indoleacrylic acid	17.5266	7.35092e-07	3.01948e-06
	limit Esi- 1.6109998 :3	15.8802	7.78373e-07	3.18299e-06
	1,4-beta-D-Glucan	17.7023	7.93043e-07	3.22857e-06
	N-Isopropylammelide Esi- 5.675002	17.7279	8.01177e-07	3.24725e-06
	C16 H21 N14 O8	15.7592	8.81287e-07	3.5562e-06
	Pyrido[3,4-c]psoralen	15.9487	9.366e-07	3.76283e-06
	PE(14:0/P-18:0)	14.485	1.00006e-06	4.00025e-06
	limit Esi- 1.6049999 :23	13.9906	1.03564e-06	4.12455e-06
	Nelfinavir	16.8098	1.09902e-06	4.35801e-06
	C32 H54 N4 O3	16.1695	1.1655e-06	4.60172e-06
	PE(20:2(11Z,14Z)/16:1(9Z))	16.9616	1.19197e-06	4.68604e-06
	PI(16:2(9Z,12Z)/16:0)	15.0335	1.27393e-06	4.98685e-06
	LysoPE(20:1(11Z)/0:0) Esi- 4.731002	15.5817	1.31632e-06	5.13084e-06
	C8 H10 N3 O6	13.7879	1.34302e-06	5.21273e-06
	C15 H36 N10 O2 S	14.9152	1.4258e-06	5.51068e-06
	N-Isopropylammelide	17.7286	1.43431e-06	5.52029e-06
	4-Amino-2-hydroxylamino-6-nitrotoluene	15.7483	1.46574e-06	5.61764e-06
	Cefamandole	13.4117	1.57278e-06	6.00276e-06
	P-Fluorophenylalanine	18.7261	1.62499e-06	6.1763e-06
	PGG2	14.9319	1.64179e-06	6.21439e-06
	C10 H15 N O3 S	15.1873	1.75636e-06	6.62069e-06
	Gniditrin	13.9869	1.78616e-06	6.70542e-06
	N-Isopropylammelide Esi- 5.6669965	17.6748	1.89451e-06	7.08315e-06
	P-Fluorophenylalanine Esi- 9.378999	18.724	1.95105e-06	7.26489e-06
	allopurinol Esi- 5.2460012 :5	16.9152	2.11816e-06	7.85519e-06
	11-Deoxocucurbitacin I	17.2403	2.32073e-06	8.57175e-06
	LysoPE(0:0/22:2(13Z,16Z)) Esi- 1.389	13.6647	2.48993e-06	9.15975e-06
	allopurinol Esi- 5.2460012	16.9091	2.5189e-06	9.22926e-06
	Amphibine A Esi- 1.6689996	15.2417	2.62082e-06	9.56442e-06
	C30 H66 N12	12.6704	2.67817e-06	9.73494e-06
	Cucurbitacin I	13.418	2.78403e-06	1.00797e-05
	Amphibine A	15.5953	2.94804e-06	1.06315e-05
	C18 H2 N2 O17 S	13.9023	3.00389e-06	1.07904e-05
	LysoPE(0:0/18:0)	15.4199	3.07756e-06	1.10119e-05
	Propapyriogenin A2 Esi- 5.320003 :19	15.8633	3.70578e-06	1.31619e-05
	C31 H62 N5 O3	14.9739	3.70717e-06	1.31619e-05
	Propapyriogenin A2 Esi- 5.320003	15.8632	3.7221e-06	1.31639e-05
	PE(18:1(11Z)/14:0) Esi- 1.2229997	13.6252	3.95767e-06	1.39432e-05
	C12 H19 N5 O4	16.6687	4.23031e-06	1.48466e-05
	7,9-Dimethyluric acid	19.7368	4.2655e-06	1.4913e-05
	9,10,13-trihydroxy-11-octadecenoic acid	16.335	4.38664e-06	1.52782e-05
	Propapyriogenin A2 Esi- 5.3209996	15.4976	4.91288e-06	1.70462e-05
	PE(20:5(5Z,8Z,11Z,14Z,17Z)/16:1(9Z))	15.1425	4.98549e-06	1.72329e-05
	PA(18:1(11Z)/18:1(9Z))	16.0569	5.53189e-06	1.90497e-05
	C19 H28 O2	14.5141	5.93003e-06	2.02536e-05
	Galactomannan	17.6581	5.9336e-06	2.02536e-05
	Galactomannan Esi- 8.386996	17.6581	5.94784e-06	2.02536e-05
	1-O,2-O,6-O-Trigalloyl-beta-D-glucose	13.6963	5.97502e-06	2.02708e-05
	PE(18:0/18:0)	13.6748	6.32349e-06	2.13739e-05
	Ornaline	15.1273	6.60299e-06	2.21991e-05
	7,9-Dimethyluric acid Esi- 7.208004	19.7522	6.6161e-06	2.21991e-05
	Maculosine Esi- 8.125	14.56	7.18643e-06	2.40247e-05
	Gentamicin	13.9858	7.44118e-06	2.47859e-05
	C10 H16 N O2	14.2863	7.55166e-06	2.50627e-05
	Undecanoic acid	15.7608	7.63985e-06	2.52639e-05
	Pirimiphos-methyl	13.2643	7.78962e-06	2.56665e-05
	limit Esi- 1.5999994	12.893	8.44287e-06	2.77192e-05
	6-Hydroxyl-1,6-dihydropurine ribonucleoside	15.8702	9.16856e-06	2.99943e-05
	Fluoroacetaldehyde	20.0566	9.53786e-06	3.09508e-05
	8-Hydroxyalanylclavam	13.8242	9.55874e-06	3.09508e-05
	6-Hydroxyl-1,6-dihydropurine ribonucleoside Esi- 6.682003	15.854	9.59516e-06	3.09508e-05
	Kuwanone G	13.7499	9.59611e-06	3.09508e-05
	THTA	17.6994	1.01541e-05	3.26356e-05
	Pleuromutilin Esi- 1.2719996 :30	15.3181	1.08887e-05	3.47573e-05
	Fluoroacetaldehyde Esi- 7.6419992	20.0555	1.08901e-05	3.47573e-05
	9,10-dihydroxy stearic acid	17.4636	1.10176e-05	3.50422e-05
	(2'S)-Deoxymyxol 2'-(2,4-di-O-methyl-?-L-fucoside) Esi- 1.6049999	15.0401	1.13095e-05	3.5846e-05
	limit Esi- 4.709	14.3263	1.18622e-05	3.74683e-05
	Trolamine Esi- 6.057003	19.0139	1.2127e-05	3.8173e-05
	Trolamine	19.0126	1.22006e-05	3.82732e-05
	Pleuromutilin	15.7798	1.3016e-05	4.06918e-05
	6-Chlorobenzene-1,2,4-triol	15.7195	1.35186e-05	4.21192e-05
	PE(15:0/18:1(11Z))	15.7398	1.38059e-05	4.28684e-05
	C23 H15 N14 O3	13.7773	1.399e-05	4.32933e-05
	C35 H71 N8 O2	13.6913	1.42825e-05	4.40498e-05
	PE(18:3(9Z,12Z,15Z)/18:4(6Z,9Z,12Z,15Z))	14.1309	1.44464e-05	4.44057e-05
	C7 H6 N O5	17.2027	1.45733e-05	4.46459e-05
	Pleuromutilin Esi- 1.2719996	15.3075	1.49934e-05	4.57798e-05
	2,4-Dihydroxypteridine Esi- 2.6760008	17.8404	1.58942e-05	4.83691e-05
	Propapyriogenin A2	16.6367	1.59762e-05	4.84576e-05
	C27 H56 N6 O2	14.2134	1.60552e-05	4.85365e-05
	(2S)-2-hydroxyphytanic acid	15.2622	1.90208e-05	5.73126e-05
	Flumequine Esi- 6.5489984	16.0696	1.96081e-05	5.88885e-05
	limit Esi- 1.6109998 :7	15.4821	2.01715e-05	6.03826e-05
	C18 H25 N2 O10	16.3406	2.19113e-05	6.53771e-05
	6,8a-Seco-6,8a-deoxy-5-oxoavermectin ''1b'' aglycone Esi- 5.3659983	13.576	2.36245e-05	7.02598e-05
	Ubiquinone 8 Esi- 1.2949992	14.5841	2.4438e-05	7.24441e-05
	Testosterone cypionate Esi- 2.3399987	15.1955	2.56313e-05	7.57364e-05
	PS(18:0/18:0)	17.144	2.95023e-05	8.68942e-05
	limit Esi- 1.6059996	13.9506	2.99027e-05	8.77914e-05
	Amarogentin Esi- 8.388	17.0777	3.23385e-05	9.43379e-05
	Amarogentin	17.0777	3.23385e-05	9.43379e-05
	2-Hexaprenyl-6-hydroxyphenol	14.9651	3.34235e-05	9.71933e-05
	PE(20:2(11Z,14Z)/15:0)	17.7305	3.38721e-05	9.81861e-05
	C3 H6 N5 O3	14.6219	3.44598e-05	9.95748e-05
	2-Hydroxy-6-oxo-6-(2-hydroxyphenyl)-hexa-2,4-dienoate	20.2625	3.72371e-05	0.000107262
	2-Hydroxy-6-oxo-6-(2-hydroxyphenyl)-hexa-2,4-dienoate Esi- 6.7100024	20.2619	3.78687e-05	0.000108739
	AMPA	19.2316	4.19995e-05	0.000120224
	TG(16:0/16:0/16:0)	12.5598	4.31913e-05	0.00012325
	18-hydroxy-9Z-octadecenoic acid	23.4209	4.47578e-05	0.000127324
	PE(16:0/22:2(13Z,16Z))	17.8442	4.66295e-05	0.000132237
	PG(18:0/18:3(9Z,12Z,15Z))	21.0674	4.98659e-05	0.000140979
	Adenosine5'-monophosphate	19.2949	5.79855e-05	0.00016343
	limit Esi- 1.2809993	13.2403	5.85544e-05	0.000164527
	Adenosine5'-monophosphate Esi- 7.5650015	19.2952	6.03554e-05	0.000169069
	limit Esi- 1.2799996	13.1576	6.17827e-05	0.000172539
	PE(22:4(7Z,10Z,13Z,16Z)/15:0)	13.9872	6.40359e-05	0.000178288
	LysoPE(0:0/22:1(13Z))	17.7024	6.42974e-05	0.000178474
	C9 H6 O13 S	16.0455	6.49424e-05	0.00017972
	Indinavir Esi- 5.3589973	16.9076	6.72523e-05	0.000185552
	Indinavir Esi- 5.3589973 :37	16.9081	6.84861e-05	0.000188388
	Ubiquinone 8	14.5301	7.28098e-05	0.000199682
	D-Threitol Esi- 6.7100024	18.6595	7.32785e-05	0.000200036
	6,8a-Seco-6,8a-deoxy-5-oxoavermectin ''1b'' aglycone	14.1633	7.33755e-05	0.000200036
	D-Threitol	18.6559	7.45314e-05	0.000202584
	C39 H69 N8	14.2975	7.87982e-05	0.000213548
	Bakankoside	16.1612	8.11581e-05	0.000219294
	C45 H61 N2	13.9179	8.95782e-05	0.000241334
	Discodermolide	13.2526	9.29471e-05	0.000249676
	1-Octacosanol Esi- 1.3250005	13.4479	9.53906e-05	0.000255491
	C36 H59 N10 Esi- 1.2939997	13.4224	0.000101555	0.000271209
	GPSer(18:0/18:1(9Z))	17.6673	0.000104736	0.000278889
	N6,N6-Dimethyladenosine	19.7962	0.000107479	0.000285363
	1-Hydroxy-2-aminoethylphosphonate Esi- 7.549999	14.565	0.00010906	0.000288726
	1-Hydroxy-2-aminoethylphosphonate	14.5605	0.000109926	0.000290179
	3,6-Dideoxy-L-galactose	15.5112	0.000113644	0.000299132
	Bay-K-8644 Esi- 6.932003	15.8487	0.000120306	0.000315759
	Bay-K-8644 Esi- 6.932003 :21	15.7757	0.000127585	0.000333167
	Pentadecylic acid	17.9566	0.000127666	0.000333167
	C28 H43 N6 O6 Esi- 4.4470015	15.199	0.000131838	0.000342224
	(2'S)-Deoxymyxol 2'-(2,4-di-O-methyl-?-L-fucoside) Esi- 4.6179976	13.7545	0.000131883	0.000342224
	C3 H2 N3 O5	16.475	0.000138641	0.000358743
	N-Cyclopropylammelide	18.2734	0.000145251	0.000374789
	Ruscopine	13.0937	0.000148811	0.000382896
	1-Octacosanol	13.3509	0.000161995	0.00041565
	1-Methylinosine Esi- 8.389005	15.6921	0.000170748	0.000435667
	Terpenoid EA-I Esi- 5.382999 :31	16.3762	0.000171644	0.000435667
	Terpenoid EA-I Esi- 5.382999 :17	16.3762	0.000171644	0.000435667
	Terpenoid EA-I Esi- 5.382999 :6	16.3762	0.000171831	0.000435667
	Terpenoid EA-I Esi- 5.382999	16.3762	0.000172174	0.000435667
	Purine Esi- 8.385997	15.1088	0.000184171	0.000464739
	C29 H35 N18 O4	14.2179	0.000185089	0.000465774
	C34 H58 N4 O3	17.4105	0.000190012	0.000475897
	PIP(18:1(9Z)/18:1(9Z))	13.1773	0.000190151	0.000475897
	2-Oxoarginine Esi- 7.7530003	20.2817	0.000192414	0.000480249
	2-Oxoarginine	20.2827	0.000194031	0.000482968
	C32 H56 N4 O3	15.8008	0.000203181	0.000504374
	Metaflumizone	14.15	0.000212012	0.000524872
	Theobromine	15.5788	0.000225943	0.000557855
	C18 H24 N6 O14	14.6114	0.000227835	0.000559246
	Ferroxamine	12.4966	0.000228176	0.000559246
	Maculosine	16.0682	0.000228339	0.000559246
	Indinavir	17.0065	0.000230544	0.000563142
	Sulfathalidine	17.2287	0.00023295	0.000567507
	MID73252:1,2,3,4-Tetrahydro-alpha,7-dihydroxy-beta-(hydroxymethyl)-9-methoxy-3,4-dioxocyclopenta[c][	13.9979	0.000237374	0.000576749
	Mecarbinzid	15.5811	0.00027098	0.000656661
	S-(p-Azidophenacyl)glutathione	14.5721	0.000282459	0.00068267
	Philanthotoxin 343 Esi- 4.6239977	17.0855	0.00028768	0.000693459
	Philanthotoxin 343	17.0793	0.000290866	0.000698587
	C38 H68 N4 O4	12.9003	0.000291332	0.000698587
	ADP-D-ribose	13.9602	0.000318595	0.000761966
	C36 H59 N10	13.4671	0.000342599	0.000815887
	N-Cyclopropylammelide Esi- 6.957	17.3893	0.000342922	0.000815887
	Terpenoid EA-I	16.805	0.000360921	0.000856486
	Testosterone cypionate Esi- 2.3320005	15.4351	0.000386085	0.000913834
	limit Esi- 1.6049999 :32	12.7494	0.000391694	0.000924721
	12-Hydroxydodecanoic acid Esi- 1.5379992	14.9758	0.000395738	0.000931866
	C13 H29 N5 S	14.8017	0.000410412	0.000963942
	Testosterone cypionate	15.5367	0.000423827	0.000992904
	beta-D-Sedoheptulopyranose	16.2504	0.000428794	0.00100198
	L-Rhamnofuranose	15.7108	0.000443454	0.0010336
	Cholesta-5,7-dien-3beta-ol benzoate	13.9693	0.000468482	0.00108916
	5beta-Cholestane-3alpha,7alpha,12alpha,23,25-pentol	14.037	0.000532913	0.00123582
	Spiramycin 3 Esi- 1.6080008	12.7774	0.000542341	0.00125451
	PE(18:0/18:3(6Z,9Z,12Z))	18.1641	0.000610988	0.00140974
	C23 H43 N17 O3	13.9982	0.000616069	0.00141789
	2,2-Bis(4-hydroxyphenyl)hexafluoropropane	14.9771	0.000625557	0.00143612
	16-Oxo-palmitate	13.6341	0.000629882	0.00144243
	PI(20:3(5Z,8Z,11Z)/16:0)	15.3627	0.000648813	0.00148208
	C14:2n-6,9	19.0894	0.00067909	0.00154738
	Deoxyadenosine	14.4165	0.000706355	0.00160551
	Fluotrimazole Esi- 3.663 :28	15.7049	0.00073026	0.00165574
	Cucurbitacin S Esi- 5.3690023 :33	13.9577	0.00073782	0.00166464
	Cucurbitacin S Esi- 5.3690023	13.9577	0.00073782	0.00166464
	Fluotrimazole Esi- 3.663	15.698	0.000744624	0.00167586
	PE(18:3(6Z,9Z,12Z)/16:0)	17.5598	0.000777671	0.00174595
	Fluotrimazole	15.7027	0.00078477	0.00175758
	PE(18:1(11Z)/16:0)	16.8721	0.000797119	0.00178088
	16-hydroxy hexadecanoic acid Esi- 1.4230002	16.1285	0.000841598	0.00187568
	Galactosylsphingosine Esi- 4.468999	17.3815	0.000884563	0.00196665
	PE(22:2(13Z,16Z)/15:0)	16.9508	0.000892414	0.0019793
	2,4-Dihydroxypteridine	17.2973	0.000912541	0.00201905
	Cucurbitacin S	14.3183	0.0010326	0.00227918
	(2S,2'S)-Oscillol 2,2'-di(?-L-fucoside)	14.2939	0.00108475	0.00238853
	DG(15:0/20:3(8Z,11Z,14Z)/0:0)	13.2621	0.00113319	0.00248917
	Mecarbinzid Esi- 4.929997	14.9997	0.00113589	0.00248917
	C15 H21 N2	15.4068	0.00115955	0.00253496
	PE(18:1(11Z)/15:0)	15.7078	0.00119202	0.00259973
	C16 H29 N22	17.0248	0.00121761	0.00264925
	Makisterone A	13.2471	0.00122176	0.00265198
	9,10-dihydroxy stearic acid Esi- 1.521	15.1843	0.00130769	0.00283179
	Inumakilactone A glycoside	13.2214	0.00131237	0.00283521
	C33 H72 Cl N5 O3	13.5888	0.00133376	0.00287465
	11-amino-undecanoic acid	16.51	0.00135587	0.00291543
	PE(20:3(5Z,8Z,11Z)/14:0)	17.9537	0.00137949	0.00295928
	2,7-Anhydro-alpha-N-acetylneuraminic acid	14.447	0.00138289	0.00295964
	limit Esi- 7.9400015	14.2361	0.00143254	0.00305876
	PE(18:2(9Z,12Z)/16:0)	17.0919	0.00146381	0.00311826
	LysoPE(18:2(9Z,12Z)/0:0)	14.0806	0.00147311	0.0031308
	LysoPE(18:2(9Z,12Z)/0:0) Esi- 5.251003	14.0802	0.0015016	0.00318394
	Fortimicin AP Esi- 1.0769998	13.218	0.00152473	0.00322553
	Galactosylsphingosine	17.0186	0.00154151	0.0032535
	Isoamyl isovalerate	16.4105	0.00158398	0.00333546
	Mycolactone	12.6998	0.0015883	0.00333689
	MID66857:alpha-Galactosyl-(1-6)-alpha-galactosyl-(1-6)-alpha-galactosyl-(1-6)-alpha-galactosyl-(1-6) Esi- 9.458995	14.7744	0.00161396	0.00338304
	PG(16:1(9Z)/18:1(9Z))	22.0281	0.0016308	0.00341052
	C20 H7 N2 O13	15.8917	0.00166289	0.00346973
	PE(14:1(9Z)/20:1(11Z))	18.3717	0.00168969	0.00351763
	Fortimicin KR	15.177	0.00174294	0.00362025
	C24 H48 N3 O	15.5708	0.00181447	0.0037603
	AMPA Esi- 3.8220005	19.2122	0.00182582	0.00376759
	D-(+)-Malic acid	17.5628	0.00182621	0.00376759
	PE(15:0/18:2(9Z,12Z))	13.967	0.00185778	0.0038241
	Cymoxanil Esi- 4.916	18.4247	0.00192294	0.00394935
	3-(5'-Methylthio)pentylmalic acid	16.0361	0.00196886	0.00403462
	beta-Alaninebetaine	19.4829	0.001991	0.00407088
	C42 H73 N3 O3	13.4211	0.0020006	0.00408139
	C32 H67 N10 O2	14.5884	0.00204543	0.00416358
	Docosanoic acid	16.6405	0.00211613	0.00429796
	2,4-Dihydroxypteridine Esi- 9.552001	17.1987	0.00212387	0.00430413
	5-O-(Indol-3-ylacetyl-myo-inositol) D-galactoside	12.9231	0.0021485	0.00434442
	C16 H34 N13	14.5899	0.00219175	0.00442211
	Acetylblasticidin S	16.8084	0.00220821	0.00444554
	Benzylhydrochlorothiazide	14.6488	0.00226218	0.00454421
	TG(12:0/12:0/12:0)	13.3797	0.00230125	0.00461258
	Penicillic Acid	17.3538	0.00231497	0.00462993
	Uric acid	17.7969	0.00240313	0.00479578
	C30 H58 O4	16.9956	0.00258852	0.00515453
	P1,P4-Bis(5'-guanosyl) tetraphosphate (GppppG)	15.7017	0.00259423	0.0051547
	Dodecanoic acid, 3-hydroxy-, (S)-; L-3-Hydroxydodecanoic acid	16.3439	0.00267012	0.005294
	DL-Methionine sulfoxide	19.4237	0.00267956	0.00529859
	DL-Methionine sulfoxide Esi- 7.523999	19.4234	0.00268424	0.00529859
	FAPy-adenine	21.0763	0.00268979	0.00529859
	FAPy-adenine Esi- 3.5059986	21.0717	0.00279996	0.00550378
	cis-1,2-Dihydroxy-1,2-dihydrodibenzothiophene	16.7035	0.00300635	0.00589682
	DG(20:2(11Z,14Z)/24:0/0:0)	13.0442	0.00301985	0.00591064
	C14 H33 N9 O S	14.8172	0.00302827	0.00591448
	Palmitic acid	22.8871	0.00308111	0.00600488
	(+/-)-6-Hydroxy-3-oxo-alpha-ionol Esi- 1.2830007	15.0456	0.00313216	0.00609143
	5-Ureido-4-imidazole carboxylate	17.5422	0.00328419	0.00637355
	C5 H11 N O2	16.1699	0.00331655	0.00642275
	PE(16:0/22:2(13Z,16Z)) Esi- 2.2450004	18.1496	0.00333737	0.00644943
	C22 H35 N10 O4 Esi- 4.7799993	14.6606	0.00336749	0.00649394
	DG(15:0/14:1(9Z)/0:0)	15.7079	0.00338682	0.00651749
	Sannamycin A	13.371	0.00343966	0.0066053
	Brassicanal A	16.7267	0.00345896	0.00662846
	cefoperazone	15.4936	0.00347279	0.00664108
	Cer(d18:1/18:1(11Z))	13.2323	0.00367664	0.00701625
	Dodecanedioic acid	16.5777	0.00372321	0.00709036
	Chlorfluazuron	14.8844	0.00380273	0.00722676
	C30 H64 N5 S	13.838	0.00381108	0.00722765
	PE(18:1(11Z)/14:0) Esi- 1.6039997	15.4187	0.00388825	0.00735876
	Megalomicin C2	16.0614	0.00426611	0.00805723
	C28 H43 N6 O6	15.3398	0.00429642	0.00809779
	C20 H11 N12 O7	14.5586	0.00440407	0.00828363
	C33 H41 N11 O3	16.6653	0.00448312	0.00841504
	Cer(d18:1/18:1(11Z)) Esi- 1.2799996	13.2538	0.00449463	0.00841938
	beta-D-Sedoheptulopyranose Esi- 5.072002	16.218	0.00479638	0.00895061
	D-Glucosyldihydrosphingosine	12.8274	0.00479776	0.00895061
	C24 H14 N2 O20	15.6388	0.00486018	0.00904862
	Mibefradil	16.802	0.00489893	0.00910228
	Granaticin	13.6368	0.00491574	0.00911502
	none	14.725	0.00496401	0.00918592
	C18 H40 N7 O4	14.5308	0.00508833	0.009397
	LysoPE(18:3(9Z,12Z,15Z)/0:0) Esi- 5.2740016	13.6332	0.00529654	0.00976182
	C24 H45 N O4	13.8108	0.0054683	0.0100582
	3-Methoxy-4-hydroxyphenylethylene glycol	14.2442	0.00566436	0.0103979
	C31 H60 O7	17.8146	0.005729	0.0104955
	Primisulfuron	15.7886	0.00595531	0.0108883
	LysoPE(0:0/18:0) Esi- 4.817001	13.2723	0.00603419	0.0110106
	C27 H38 N5 O	15.3781	0.00621465	0.0113173
	C29 H46 N7 O2 S	14.9092	0.00624707	0.0113538
	PI(16:1(9Z)/16:0) Esi- 1.6049999	14.7708	0.0064638	0.0117244
	D-Glutamine	19.1645	0.00663522	0.0120116
	C30 H67 N16	14.5214	0.00666421	0.0120403
	Brassicanal A Esi- 3.5147853	16.7544	0.00691096	0.0124615
	limit Esi- 1.6049999	15.4663	0.00702411	0.0126406
	DG(18:2(9Z,12Z)/15:0/0:0)	15.7922	0.00709027	0.0127347
	C14 H14 O19 Esi- 7.8940015	15.7092	0.00720845	0.0129216
	C22 H43 N2 S	14.1266	0.00746809	0.0133609
	Myxochelin B	14.6165	0.00753212	0.0134492
	C15 H20 N	15.0707	0.00756289	0.0134778
	N2'-Acetylgentamicin C1a	15.1127	0.00771799	0.0137275
	C24 H41 N6	14.1601	0.00778645	0.0138225
	Dodecanedioic acid Esi- 1.2760007	16.6015	0.00792492	0.0140411
	C32 H48 N15	15.6679	0.00798441	0.0141191
	PE(18:1(11Z)/14:0)	16.9084	0.00832684	0.0146963
	C4 H6 O5	21.4444	0.00835999	0.0147264
	C6 H5 N6 O	17.5398	0.00847526	0.0149008
	C45 H40 N6 O	12.2797	0.0085302	0.0149461
	PE(14:1(9Z)/18:1(9Z)) Esi- 1.1910006	12.8941	0.00853363	0.0149461
	Fortimicin AP	15.8218	0.00901595	0.0157607
	2-C-Methyl-D-erythritol 4-phosphate Esi- 4.908998	18.1452	0.00923276	0.016109
	2-C-Methyl-D-erythritol 4-phosphate	18.1281	0.00933977	0.0162647
	Flutriafol	15.0139	0.00945465	0.0164335
	Galactosylsphingosine Esi- 1.2070005	13.2912	0.00959534	0.0166465
	NS-102	13.8642	0.010225	0.0177053
	C25 H37 N16 O	13.8761	0.0103065	0.0178128
	C6 H2 N4 Esi- 6.7709975	16.1355	0.0103383	0.017834
	Brassicanal A Esi- 3.5097857	16.7267	0.0105916	0.0182367
	C7 H7 N4 O7 S	15.1306	0.0107688	0.0185069
	Lignoceric acid	16.7043	0.0110014	0.0188714
	C27 H34 N20 O Esi- 1.0620002	13.8331	0.0113209	0.0193831
	PI(16:2(9Z,12Z)/16:0) Esi- 4.658001	14.2064	0.0113537	0.019403
	(-)-menthyl beta-D-glucoside	14.8784	0.0117071	0.0199696
	2,8-Dihydroxyadenine	14.9842	0.0119634	0.0203689
	Chikusetsusaponin III	15.2229	0.0121292	0.020613
	3-(2,4-Cyclopentadien-1-ylidene)pregn-4-en-20-one	14.8017	0.0121861	0.0206712
	Mesoporphyrin IX	14.7621	0.0133704	0.0226383
	13(S)-HpODE Esi- 1.3580008	14.4035	0.0138837	0.023464
	C6 H20 N6 O S	13.4612	0.0142293	0.0240038
	C13 H26 N2 O2	14.7331	0.0146599	0.0246847
	Phosphocreatine	16.6048	0.0148393	0.0249409
	C12 H28 N9 O2	15.7953	0.0148904	0.024981
	Makisterone A Esi- 1.2970005	13.3483	0.0151364	0.0253407
	limit Esi- 8.514005	16.6368	0.0151601	0.0253407
	PE(18:0/18:3(9Z,12Z,15Z))	14.94	0.0152406	0.0254288
	C5 H12 N2 O2	16.8609	0.0155932	0.0259697
	limit Esi- 7.8089995	13.8183	0.0158082	0.02628
	limit Esi- 1.2319995	12.4885	0.0161279	0.026763
	3-(2,4-Cyclopentadien-1-ylidene)pregn-4-en-20-one Esi- 1.368	14.7145	0.0161909	0.0267855
	PI(20:4(8Z,11Z,14Z,17Z)/16:0)	16.9432	0.0162	0.0267855
	limit Esi- 2.2409995	15.3613	0.0162747	0.0268605
	DG(15:0/22:5(4Z,7Z,10Z,13Z,16Z)/0:0)	14.9772	0.0166003	0.0273487
	PM-toxin B	13.8927	0.0166962	0.0274572
	C27 H34 N20 O	13.8209	0.016997	0.0279007
	Chavicol Esi- 4.628001	17.4291	0.0170268	0.0279007
	all-trans-8'-Apo-beta-carotenal	14.2287	0.0172586	0.0282301
	Hypoxanthine Esi- 5.9960012	17.5258	0.0173672	0.0283571
	Tetraconazole	13.4846	0.0188475	0.0306704
	C31 H39 N14 O2	16.587	0.0188509	0.0306704
	C7 H9 N5 O6	16.4267	0.0190344	0.0309093
	MG(0:0/20:1(11Z)/0:0)	14.6698	0.0190653	0.0309093
	Hygromycin A	15.8769	0.0191351	0.0309678
	C19 H28 N	17.5576	0.0191708	0.0309708
	Red chlorophyll catabolite	12.7978	0.0192623	0.0310639
	C16 H28 N7 O	13.3426	0.0194602	0.031305
	C8 H20 N2 O6	15.6488	0.0194802	0.031305
	PE(22:2(13Z,16Z)/14:0) Esi- 1.5979998	18.0692	0.0199443	0.0319947
	D-Glucuronic acid Esi- 7.0450006	17.4157	0.0204781	0.0327936
	PE(22:2(13Z,16Z)/14:0)	18.4352	0.0210609	0.033668
	Chavicol	17.3995	0.0211417	0.0337384
	PE(24:0/14:1(9Z))	17.2596	0.022035	0.0351027
	PE(18:4(6Z,9Z,12Z,15Z)/20:0)	16.1794	0.0222852	0.0354396
	2-Hexaprenyl-3-methyl-6-methoxy-1,4 benzoquinone Esi- 1.3969996	13.8651	0.0225327	0.0357712
	1-Palmitoyl Lysophosphatidic Acid	13.6821	0.0228327	0.0361848
	Stearic acid	21.9005	0.0232769	0.036825
	2,6-Dimethoxyphenol	18.1838	0.0235099	0.0371294
	C31 H65 N8 O2	14.1401	0.0249482	0.0393331
	2-Oxo-6-methylthiohexanoic acid	14.0155	0.0254742	0.0400934
	C31 H5 N O18	14.0212	0.0256863	0.0403579
	LysoPE(0:0/18:2(9Z,12Z))	20.4758	0.0261497	0.0410156
	Hypoxanthine	17.4334	0.0266129	0.0416308
	Phosphoenol-4-deoxy-3-tetrulosonate	18.1002	0.0266328	0.0416308
	limit Esi- 7.625	13.4159	0.0270193	0.042163
	Archaeol	13.1992	0.0272125	0.0423922
	Isocitric acid Esi- 7.0239997	16.223	0.0272608	0.0423953
	2-C-Methyl-D-erythritol 4-phosphate Esi- 6.039001 :1	18.4023	0.0273964	0.042534
	limit Esi- 1.2060003	14.3328	0.0277759	0.0430503
	C21 H42 N3 O	13.8286	0.0283876	0.0439241
	DG(16:1(9Z)/15:0/0:0) Esi- 1.4270009	15.1634	0.028892	0.0446291
	limit Esi- 7.8259997	13.0587	0.0295859	0.0456241
	C38 H74 N5 O9	16.9448	0.0297115	0.0457407
	14-Deacetylnudicauline	19.2786	0.030494	0.0467371
	N-Methyl-2,3,7,8-tetramethoxy-5,6-dihydrobenzophenathridine-6-ethanoic acid	15.7017	0.0305628	0.0467371
	N-Methyl-2,3,7,8-tetramethoxy-5,6-dihydrobenzophenathridine-6-ethanoic acid Esi- 3.7960002 :16	15.7017	0.0305628	0.0467371
	N-Methyl-2,3,7,8-tetramethoxy-5,6-dihydrobenzophenathridine-6-ethanoic acid Esi- 3.7960002	15.7017	0.0305628	0.0467371
	14-Deacetylnudicauline Esi- 1.2120006	19.2788	0.0311848	0.0476087
	13(S)-HpODE	14.4692	0.0312762	0.0476688
	C31 H58 N12 O	15.578	0.0332074	0.0505282
	Sugetriol	15.1292	0.0340788	0.0517682
	N-Methyl-2,3,7,8-tetramethoxy-5,6-dihydrobenzophenathridine-6-ethanoic acid Esi- 3.7940006	16.0349	0.0346765	0.0525888
	Eupacunoxin	16.345	0.0352394	0.0533542
	DG(14:1(9Z)/16:0/0:0) Esi- 1.2120006	13.658	0.0354809	0.0536313
	C38 H61 N9 O2	12.9961	0.0358293	0.0540686
	Photinus luciferin	17.7188	0.0365811	0.0551123
	butoconazole	20.9102	0.0381115	0.0573238
	C10 H20 N11	14.5555	0.0381859	0.0573414
	1,2-Di-(9Z,12Z,15Z-octadecatrienoyl)-3-(Galactosyl-alpha-1-6-Galactosyl-beta-1)-glycerol	15.6702	0.0383958	0.0575623
	C14 H14 O19	15.7416	0.0384899	0.057609
	C18 H8 O12 S	17.1872	0.0394138	0.0588956
	9S,11R,15S-trihydroxy-2,3-dinor-13E-prostaenoic acid-cyclo[8S,12R]	15.4954	0.0395704	0.0590334
	(R)-10-hydroxystearic acid	15.5212	0.0402124	0.0598935
	limit Esi- 8.515004	16.383	0.040816	0.0606939
	LysoPE(0:0/20:0)	17.4445	0.0426247	0.0632807
	DG(15:0/14:0/0:0)	17.0632	0.0436549	0.0647054
	PE(18:3(9Z,12Z,15Z)/18:4(6Z,9Z,12Z,15Z)) Esi- 4.6260023	12.9973	0.0446574	0.0660843
	C14 H30 N6 O3	15.7612	0.0447837	0.0661643
Positive	PE(18:1(11Z)/18:3(9Z,12Z,15Z))	20.9482	9.98923e-20	2.09374e-16
	limit Esi+ 1.6329997	22.0593	9.51685e-19	9.97366e-16
	PG(16:1(9Z)/20:3(5Z,8Z,11Z))	19.686	2.84369e-18	1.98679e-15
	Becanamycin	14.9502	7.01109e-18	2.97684e-15
	Cellopentaose	17.4191	7.10124e-18	2.97684e-15
	DG(14:1(9Z)/20:0/0:0)	20.0635	4.87722e-17	1.51307e-14
	LysoPE(0:0/16:1(9Z)) Esi+ 4.6020007	22.3941	5.05318e-17	1.51307e-14
	LysoPE(0:0/16:1(9Z))	23.3688	1.68404e-16	4.17692e-14
	L-Glutamate Esi+ 6.3099985	15.8165	1.79353e-16	4.17692e-14
	PE(22:1(13Z)/15:0)	22.5625	3.05598e-16	6.40533e-14
	limit Esi+ 1.6320001	18.7004	3.77128e-16	7.18601e-14
	limit Esi+ 3.5969996 :2	19.1709	7.07121e-16	1.23511e-13
	limit Esi+ 1.7970005	19.078	1.25569e-15	2.02455e-13
	limit Esi+ 1.7960002	19.0713	1.70177e-15	2.54779e-13
	C27 H37 N3 S	14.7842	5.20458e-15	7.27253e-13
	2-(beta-D-Glucosyl)-sn-glycerol 3-phosphate	14.4154	6.807e-15	8.91717e-13
	Palatinose Esi+ 9.411002	16.709	7.7761e-15	9.34997e-13
	Levofuraltadone Esi+ 9.165	16.4708	8.02955e-15	9.34997e-13
	LysoPE(0:0/16:0) Esi+ 1.7710003	22.2506	1.00492e-14	1.10859e-12
	Flecainide Esi+ 7.708005	15.7285	1.28569e-14	1.3474e-12
	Levofuraltadone Esi+ 9.161997	16.3095	1.51586e-14	1.51006e-12
	LysoPE(0:0/16:0)	22.274	1.58499e-14	1.51006e-12
	Flecainide Esi+ 7.708005 :30	15.716	1.84969e-14	1.68563e-12
	Kainic acid	13.706	3.38281e-14	2.8738e-12
	LysoPE(0:0/18:1(11Z)) Esi+ 1.7149998	23.3131	3.42772e-14	2.8738e-12
	DG(14:0/16:0/0:0)	16.6717	4.2037e-14	3.38883e-12
	PG(18:0/18:3(9Z,12Z,15Z))	20.0087	8.289e-14	6.43472e-12
	limit	23.1902	9.01532e-14	6.74861e-12
	Cellopentaose Esi+ 9.411997	15.9527	1.38089e-13	9.98047e-12
	LysoPE(0:0/16:0) Esi+ 4.5299993	21.7883	1.52751e-13	1.06722e-11
	Cellohexaose	16.2121	1.63847e-13	1.10782e-11
	C33 H56 N15 O2	15.6744	1.81746e-13	1.19044e-11
	Phytosphingosine	17.8275	1.93982e-13	1.23208e-11
	C21 H28 N23 O	16.6948	2.35813e-13	1.45372e-11
	Glycerylphosphorylethanolamine	19.7736	3.09073e-13	1.82404e-11
	C22 H46 N2 S	16.0425	3.1329e-13	1.82404e-11
	C29 H45 N9 O2 Esi+ 1.7560002	16.8651	3.78294e-13	2.14298e-11
	C15 H23 N5 O9 S	16.092	4.61967e-13	2.54811e-11
	limit Esi+ 1.7439998	16.946	5.43689e-13	2.92198e-11
	1,2-Di-(9Z,12Z,15Z-octadecatrienoyl)-3-(Galactosyl-alpha-1-6-Galactosyl-beta-1)-glycerol	15.9693	5.70352e-13	2.98864e-11
	limit Esi+ 2.1309996	21.6447	5.87869e-13	3.0053e-11
	Levofuraltadone Esi+ 7.7149973 :15	19.0385	6.45135e-13	3.21953e-11
	Maltohexaose	17.1876	7.03607e-13	3.36896e-11
	Levofuraltadone Esi+ 7.7149973	19.0426	7.07225e-13	3.36896e-11
	MG(0:0/16:1(9Z)/0:0) Esi+ 1.7429997	16.4326	7.77946e-13	3.6235e-11
	L-Methionine	17.6866	8.97172e-13	4.08089e-11
	limit Esi+ 1.6339997	22.5457	9.15085e-13	4.08089e-11
	C26 H32 N3 O19	13.9922	9.51168e-13	4.15343e-11
	3,6-Anhydroglucose	19.4036	1.17223e-12	4.92764e-11
	LysoPE(0:0/18:1(11Z))	23.4715	1.17549e-12	4.92764e-11
	Deoxytubulosine	16.4185	1.59745e-12	6.56521e-11
	Glucosisymbrin	14.2996	1.63012e-12	6.57064e-11
	C28 H15 N5 O12	13.9038	2.03683e-12	8.0551e-11
	limit Esi+ 1.361	17.0405	2.5859e-12	1.00371e-10
	Tiamulin Esi+ 1.697999	22.1878	3.07776e-12	1.15614e-10
	PG(16:0/16:1(9Z)) Esi+ 1.4039996	19.5765	3.16374e-12	1.15614e-10
	limit Esi+ 4.399999	17.8379	3.16495e-12	1.15614e-10
	LysoPE(0:0/16:0) Esi+ 1.7729998	14.6877	3.19923e-12	1.15614e-10
	Primidolol	16.0464	3.33082e-12	1.18329e-10
	PG(16:1(9Z)/18:1(9Z))	20.7629	3.51223e-12	1.21788e-10
	DG(14:1(9Z)/18:0/0:0)	20.1376	3.57495e-12	1.21788e-10
	PE(22:1(13Z)/15:0) Esi+ 2.1129992	22.0089	3.66024e-12	1.21788e-10
	PE(18:1(11Z)/18:2(9Z,12Z))	22.5297	3.6606e-12	1.21788e-10
	N1-(5-Phospho-a-D-ribosyl)-5,6-dimethylbenzimidazole	16.2172	3.83957e-12	1.25746e-10
	PE(18:1(11Z)/16:0)	20.7137	3.97924e-12	1.28315e-10
	Lithocholic acid taurine conjugate	19.6214	4.45118e-12	1.41043e-10
	C11 H14 N4 O12	15.4889	4.50853e-12	1.41043e-10
	DG(18:1(9Z)/18:3(6Z,9Z,12Z)/0:0)	19.069	5.03812e-12	1.53463e-10
	limit Esi+ 2.0889995	21.5232	5.05199e-12	1.53463e-10
	limit Esi+ 9.160003	13.1412	5.42581e-12	1.62464e-10
	3,6-Anhydrogalactose	17.0479	5.79949e-12	1.70853e-10
	Palatinose Esi+ 7.713001	22.1648	5.86898e-12	1.70853e-10
	Palatinose	22.1484	6.14773e-12	1.76516e-10
	Hydrocortisone caproate	14.7192	6.30425e-12	1.78564e-10
	C18 H27 O22 S	14.7374	6.63066e-12	1.83583e-10
	Palatinose Esi+ 7.713001 :4	22.1657	6.65662e-12	1.83583e-10
	Kasugamycin	17.1247	7.11263e-12	1.93611e-10
	N1-(5-Phospho-a-D-ribosyl)-5,6-dimethylbenzimidazole Esi+ 7.7109995 :64	16.2635	7.28059e-12	1.94092e-10
	Flavonol 3-O-beta-D-glucosyl-(1-2)-beta-D-glucosyl-(1-2)-beta-D-glucoside	19.5073	7.31547e-12	1.94092e-10
	C34 H12 N9 O	16.6533	7.58895e-12	1.9883e-10
	C23 H16 O13	17.3814	9.46013e-12	2.44796e-10
	limit Esi+ 1.7389994	17.6256	1.10308e-11	2.81958e-10
	C37 H62 N3 O	18.3355	1.56068e-11	3.94118e-10
	C30 H66 N9 O S2	16.4982	1.6982e-11	4.23741e-10
	PG(16:1(9Z)/16:1(9Z))	18.3568	2.10501e-11	5.16386e-10
	C35 H20 N10 O10	15.3504	2.11876e-11	5.16386e-10
	2-amino-3-oxo-hexanedioic acid	16.9996	2.22393e-11	5.35788e-10
	6-Methylthioguanosine monophosphate	17.7277	2.43109e-11	5.79041e-10
	C32 H61 N16 O2	16.7924	2.61611e-11	6.10858e-10
	C19 H23 N10 O12 S	15.5045	2.62296e-11	6.10858e-10
	C15 H34 N3 O16	14.0787	2.9626e-11	6.82375e-10
	MK826	14.8532	3.35415e-11	7.64133e-10
	N1-(5-Phospho-a-D-ribosyl)-5,6-dimethylbenzimidazole Esi+ 7.7109995	16.1108	3.42551e-11	7.64133e-10
	C17 H35 S	16.6164	3.42693e-11	7.64133e-10
	LysoPE(0:0/16:1(9Z)) Esi+ 4.235998	21.5162	3.55636e-11	7.78722e-10
	S-(2,4-Dinitrophenyl)glutathione	16.2743	3.56666e-11	7.78722e-10
	C18 H25 O24	16.7647	4.13698e-11	8.93929e-10
	Pamidronate	16.0747	4.18357e-11	8.94771e-10
	C17 H35 N20 Esi+ 1.6780005	21.3417	4.46657e-11	9.45649e-10
	Stigmatellin Y Esi+ 2.4459994	16.5739	4.77441e-11	1.00072e-09
	DG(18:1(9Z)/18:3(6Z,9Z,12Z)/0:0) Esi+ 1.3549997	19.0511	4.94371e-11	1.02594e-09
	limit Esi+ 6.5110006	13.1425	5.18084e-11	1.05963e-09
	N-acetyllactosamine	16.6087	5.20713e-11	1.05963e-09
	Glucosylceramide (d18:1/16:0)	18.9108	5.55571e-11	1.11969e-09
	C18 H38 N7	18.2544	5.83358e-11	1.16449e-09
	limit Esi+ 1.7299999	17.5058	6.28778e-11	1.24147e-09
	N-acetyllactosamine Esi+ 7.7109995 :143	16.6156	6.33768e-11	1.24147e-09
	3-Hydroxyisoheptanoic acid	14.4104	6.57783e-11	1.27467e-09
	Tiamulin	22.8862	6.62876e-11	1.27467e-09
	PE(18:1(11Z)/14:1(9Z))	20.1084	6.84648e-11	1.30457e-09
	DG(16:1(9Z)/18:1(11Z)/0:0)	20.6537	7.25861e-11	1.37063e-09
	Taurine	22.0394	7.43723e-11	1.39182e-09
	D-Hamamelose	20.7188	7.81272e-11	1.44916e-09
	N-acetyllactosamine Esi+ 7.7109995	16.5598	8.98681e-11	1.65231e-09
	D-Hamamelose Esi+ 6.6340017	20.7165	9.1144e-11	1.6612e-09
	(R)-3-(4-Hydroxyphenyl)lactate	15.8828	9.32009e-11	1.68404e-09
	DL-Indole-3-lactic acid (3-Indolelactic acid)	17.7136	9.44401e-11	1.6885e-09
	DG(14:1(9Z)/18:1(9Z)/0:0) Esi+ 1.3940008	18.4174	9.50586e-11	1.6885e-09
	LysoPE(20:1(11Z)/0:0) Esi+ 1.6889997	16.1003	9.76234e-11	1.71948e-09
	limit Esi+ 1.7519996	15.7412	9.96324e-11	1.74025e-09
	Beta-d-lactose Esi+ 7.7109995 :5	19.3603	1.02225e-10	1.76799e-09
	Beta-d-lactose	19.3739	1.02908e-10	1.76799e-09
	Beta-d-lactose Esi+ 7.7109995	19.3737	1.04446e-10	1.77983e-09
	Dubinidine	20.8221	1.05655e-10	1.78591e-09
	2-Methylacetoacetyl-CoA	14.6706	1.08158e-10	1.80825e-09
	Flecainide	17.5371	1.08708e-10	1.80825e-09
	Aflatoxin B1exo-8,9-epoxide-GSH	14.3598	1.09565e-10	1.80825e-09
	limit Esi+ 6.5169992	14.3136	1.40403e-10	2.2991e-09
	Phenylamil Esi+ 7.418	18.9906	1.52272e-10	2.47412e-09
	Phenylamil	18.9947	1.5677e-10	2.52762e-09
	Convicine	18.9668	1.63105e-10	2.60967e-09
	limit Esi+ 4.563002	17.7845	1.64942e-10	2.61908e-09
	C19 H22 N O7	13.8492	1.85556e-10	2.92426e-09
	C29 H46 N2 O11	18.7223	1.96429e-10	3.07251e-09
	Wyerone	18.3399	1.99091e-10	3.09107e-09
	3-Dimethylallyl-4-hydroxymandelic acid	15.1908	2.32387e-10	3.58149e-09
	Phenylamil Esi+ 7.416996	18.9795	2.65502e-10	4.06198e-09
	Deacetylcephalosporin C	15.3856	2.7469e-10	4.17211e-09
	PE(18:1(11Z)/14:1(9Z)) Esi+ 1.6390002	19.8326	3.06632e-10	4.62374e-09
	C17 H35 N20	22.5145	3.26193e-10	4.88358e-09
	C14 H18 N2 O18	14.8356	3.30366e-10	4.91097e-09
	C10 H9 N O5	15.3399	3.85295e-10	5.68718e-09
	PE(22:1(13Z)/20:4(5Z,8Z,11Z,14Z))	14.9465	4.34036e-10	6.36182e-09
	Cellopentaose Esi+ 9.609001	15.0574	4.47965e-10	6.52038e-09
	N(6)-[(Indol-3-yl)acetyl]-L-lysine	15.5292	4.88878e-10	7.04192e-09
	Talatizamine	18.9918	4.90516e-10	7.04192e-09
	2-Methylbutyrylglycine Esi+ 6.544999	15.9084	5.37188e-10	7.6595e-09
	C4 H3 N2 O3	17.2887	5.4126e-10	7.66541e-09
	Dihydrozeatin riboside monophosphate	16.0708	5.92697e-10	8.31535e-09
	Thermozeaxanthin-13	15.4815	5.95087e-10	8.31535e-09
	C8 H13 N4 O7 S	17.0318	6.51442e-10	9.04254e-09
	DG(14:1(9Z)/20:0/0:0) Esi+ 1.4039996	19.3792	6.81678e-10	9.39998e-09
	Glutathione	15.7397	6.92667e-10	9.44779e-09
	limit Esi+ 4.494002 :3	19.4077	6.9416e-10	9.44779e-09
	limit Esi+ 6.483998	14.6621	7.33775e-10	9.92253e-09
	C4 H5 N4 O	17.1212	7.40778e-10	9.95302e-09
	DG(14:1(9Z)/22:2(13Z,16Z)/0:0)	19.4457	7.90307e-10	1.05509e-08
	limit Esi+ 1.7050009	18.7799	8.67591e-10	1.15093e-08
	PI(18:1(11Z)/18:2(9Z,12Z))	14.6569	9.08846e-10	1.19808e-08
	Benexate	15.2262	9.25929e-10	1.21297e-08
	Thiophene-2-carbonyl-CoA	13.1406	1.01445e-09	1.32067e-08
	C21 H41 N12 O3	16.5379	1.06673e-09	1.38016e-08
	Floxacillin	15.81	1.25849e-09	1.61827e-08
	PE(20:2(11Z,14Z)/18:2(9Z,12Z))	17.1875	1.2762e-09	1.63104e-08
	Avermectin A2b	14.8506	1.29905e-09	1.65019e-08
	C24 H16 N18 O3	13.5002	1.39718e-09	1.76415e-08
	2-hydroxy-iminostilbene	15.5711	1.52076e-09	1.90869e-08
	limit Esi+ 1.787	14.5351	1.55519e-09	1.94028e-08
	limit Esi+ 4.460999	15.9966	1.60333e-09	1.98851e-08
	Allose	18.3251	1.95356e-09	2.40863e-08
	Usambarine	19.711	1.98039e-09	2.42743e-08
	C29 H63 N3 O4	16.3749	2.01832e-09	2.45954e-08
	limit Esi+ 1.7109995	15.3386	2.0958e-09	2.53918e-08
	C17 H40 N6 O	17.9248	2.11228e-09	2.54333e-08
	2,2-Dibutyl-3-(4-methoxyphenyl)-4-methyl-2H-1-benzopyran-7-ol acetate	19.8351	2.12349e-09	2.54333e-08
	C8 H10 N4 O4	15.7952	2.21489e-09	2.63773e-08
	Nitrofurazone	17.9066	2.61763e-09	3.09975e-08
	Buprenorphine Esi+ 4.597	20.5316	2.8451e-09	3.35019e-08
	Porphobilinogen	15.1255	3.08375e-09	3.59259e-08
	limit Esi+ 4.494002	19.4008	3.08524e-09	3.59259e-08
	Ginkgetin	14.2554	3.20723e-09	3.71401e-08
	D-Urobilin Esi+ 5.2100024	17.9226	3.59324e-09	4.13815e-08
	Naptalam	16.3421	3.81354e-09	4.36786e-08
	Disenecionyl cis-khellactone	14.0422	3.87687e-09	4.41626e-08
	Gentamicin A2	16.0503	3.95134e-09	4.47676e-08
	C15 H24 N9 O9	16.075	3.98746e-09	4.47888e-08
	2-Hydroxy-6-oxonona-2,4-diene-1,9-dioate	21.515	3.99595e-09	4.47888e-08
	C20 H22 N11 O13 S	15.2493	4.04596e-09	4.51082e-08
	Isopentenyladenosine-5'-triphosphate	15.8505	4.12053e-09	4.55917e-08
	C17 H2 N	18.1031	4.13283e-09	4.55917e-08
	C25 H51 N3 O6 S Esi+ 1.6689994	21.2524	4.18735e-09	4.59513e-08
	limit Esi+ 2.080001	18.2145	4.32854e-09	4.72532e-08
	C33 H49 N6 O3	15.6989	4.6953e-09	5.09243e-08
	C30 H19 N18 O3 S Esi+ 7.6120005	17.0683	4.71341e-09	5.09243e-08
	D-Hamamelose Esi+ 6.5129995	20.042	4.83091e-09	5.19261e-08
	6-Carboxyhexanoyl-CoA (Pimeloyl-CoA)	13.7302	5.19027e-09	5.55041e-08
	Isosorbide dinitrate	21.6261	5.35498e-09	5.69748e-08
	limit Esi+ 3.5969996	20.0579	5.4056e-09	5.69828e-08
	MG(0:0/18:1(9Z)/0:0)	15.6281	5.41321e-09	5.69828e-08
	LysoPE(0:0/14:0)	18.1608	5.43729e-09	5.69828e-08
	limit Esi+ 4.684001	16.6003	6.04103e-09	6.2995e-08
	C3 H3 N4 O	20.4136	6.14566e-09	6.37688e-08
	C7 H9 N4 O	18.592	6.31668e-09	6.52205e-08
	Uridine diphosphate-N-acetylglucosamine	16.2522	6.47234e-09	6.62174e-08
	limit Esi+ 1.6959994	16.5528	6.47641e-09	6.62174e-08
	D-Urobilin	17.2564	7.47451e-09	7.60513e-08
	C35 H41 N15 O3	14.1124	8.00245e-09	8.10296e-08
	C17 H35 N20 Esi+ 3.8949997	21.3298	8.18675e-09	8.24973e-08
	Fagomine	18.0815	8.57379e-09	8.59841e-08
	Ceramide (d18:1/16:0)	17.3095	9.03696e-09	9.00555e-08
	L-beta-aspartyl-L-glutamic acid	18.5511	9.0657e-09	9.00555e-08
	D-Biotin	15.633	9.2807e-09	9.17564e-08
	Tridecanoic acid, 4,8,12-trimethyl-; 4,8,12-Trimethyltridecanoic acid	15.3662	9.36161e-09	9.21217e-08
	C12 H11 N8 O4	13.3708	1.01583e-08	9.94946e-08
	DG(15:0/16:1(9Z)/0:0)	15.3379	1.03661e-08	1.01058e-07
	Stigmatellin Y	16.5582	1.18804e-08	1.15284e-07
	Arachidonoyl dopamine Esi+ 1.73	15.21	1.19651e-08	1.1557e-07
	Cucurbitine Esi+ 9.166995	17.9363	1.20648e-08	1.15668e-07
	trans-Zeatin riboside triphosphate	14.9645	1.20855e-08	1.15668e-07
	202-791	15.9334	1.22407e-08	1.16621e-07
	Fagomine Esi+ 9.178	18.0819	1.38569e-08	1.31421e-07
	C20 H41 N4 O2	20.6245	1.40188e-08	1.32358e-07
	limit Esi+ 4.425999	15.7326	1.48709e-08	1.39773e-07
	DG(16:0/20:3(5Z,8Z,11Z)/0:0)	18.8906	1.55871e-08	1.4585e-07
	Cucurbitacin A	17.9067	1.61446e-08	1.50396e-07
	C35 H71 N3 S	16.8497	1.72508e-08	1.5999e-07
	Mannose 1-phosphate Esi+ 8.1310005	18.4604	1.73277e-08	1.59995e-07
	limit Esi+ 1.7140003	18.1596	1.75339e-08	1.61189e-07
	PS(18:0/20:0)	12.7194	1.81367e-08	1.66003e-07
	C28 H42 N6 O S	15.6732	1.8299e-08	1.6676e-07
	limit Esi+ 6.481002	14.7825	1.9194e-08	1.74159e-07
	PE(22:5(4Z,7Z,10Z,13Z,16Z)/20:3(8Z,11Z,14Z))	14.4127	2.01063e-08	1.8165e-07
	Cymarin	17.2093	2.1122e-08	1.90007e-07
	Dimethyl 4,4-o-Phenylene-Bis (3-Thiophanate)	13.6221	2.29067e-08	2.04665e-07
	C30 H19 N18 O3 S	17.0939	2.29467e-08	2.04665e-07
	C31 H49 N9 O2	15.1645	2.33458e-08	2.07342e-07
	N-Benzoyl-D-arginine-4-nitroanilide	17.881	2.39418e-08	2.11738e-07
	Bisphenol A dimethacrylate	14.8805	2.46588e-08	2.17163e-07
	LysoPE(20:1(11Z)/0:0)	17.6012	2.48541e-08	2.17967e-07
	C24 H34 N8 O3	15.911	2.75912e-08	2.40963e-07
	L-Arginine	23.6399	2.80707e-08	2.44134e-07
	Salannin	18.9861	2.84176e-08	2.46129e-07
	C15 H33 N20	22.2379	2.95367e-08	2.54769e-07
	D-Urobilin Esi+ 5.2100024 :25	17.7034	3.00175e-08	2.57856e-07
	C25 H51 N3 O6 S Esi+ 4.1470017	22.3049	3.0835e-08	2.63796e-07
	Carthamin	16.8966	3.24182e-08	2.76214e-07
	Lasiocarpine	17.893	3.25916e-08	2.76567e-07
	N-a-Acetylcitrulline	15.2571	3.47734e-08	2.93891e-07
	C25 H51 N3 O6 S	22.3082	3.59123e-08	3.02298e-07
	C12 H3 O	16.9259	3.69276e-08	3.08431e-07
	5-Formyl-5,6,7,8-tetrahydromethanopterin	16.7932	3.69352e-08	3.08431e-07
	Lasiocarpine Esi+ 4.9290004	17.8951	3.72861e-08	3.10126e-07
	C21 H22 N14 O8	12.8538	3.8003e-08	3.14839e-07
	Actinorhodin	16.8177	4.52464e-08	3.73372e-07
	3-alpha-androstanediol glucuronide	12.6929	4.77816e-08	3.92619e-07
	Benalfocin	15.3472	4.79535e-08	3.92619e-07
	limit Esi+ 7.291996	17.4716	5.08882e-08	4.15026e-07
	Maltohexaose Esi+ 9.605996	16.1397	5.86025e-08	4.76088e-07
	Pantothenic Acid	18.4326	5.99985e-08	4.85548e-07
	C36 H63 N8	17.6047	6.67151e-08	5.35928e-07
	Isopentenyl pyrophosphate Esi+ 7.2409983	14.783	6.67353e-08	5.35928e-07
	8-Oxocoformycin	17.0155	7.17883e-08	5.74306e-07
	C30 H52 N20	15.6595	7.22497e-08	5.75414e-07
	C45 H8 N4 O2	11.6469	7.24758e-08	5.75414e-07
	AminoDHQ Esi+ 6.436002	15.2668	7.79993e-08	6.1693e-07
	2-Nitrofuran	17.0973	7.99436e-08	6.29931e-07
	C52 H63 N	14.2838	8.04382e-08	6.31455e-07
	C20 H32 N8 O17 S	19.0496	8.36834e-08	6.54479e-07
	Daphnoretin	14.832	9.51096e-08	7.41077e-07
	DL-Homoserine	16.6953	1.00879e-07	7.8312e-07
	C7 H15 N O3	20.8635	1.01861e-07	7.87829e-07
	N?-Acetyl-L-arginine	15.0283	1.07375e-07	8.27418e-07
	C32 H40 N O2	15.3793	1.12199e-07	8.61426e-07
	Cellotetraose	18.3546	1.33363e-07	1.02018e-06
	S-Adenosylhomocysteine	15.7095	1.34383e-07	1.02424e-06
	Glipizide	13.7573	1.50969e-07	1.14649e-06
	Megalomicin C2 Esi+ 4.401998	18.9951	1.76369e-07	1.33455e-06
	C6 H8 N6 O5	14.6079	1.78463e-07	1.34553e-06
	Phaseolotoxin	13.8007	1.8047e-07	1.35579e-06
	Epoxymurin-A	15.7924	2.00701e-07	1.50239e-06
	L-Iditol	17.0337	2.04616e-07	1.52625e-06
	C5 H10 N4 O6	19.4394	2.18055e-07	1.62072e-06
	C22 H41 N O2	20.4828	2.29175e-07	1.69735e-06
	Salannin Esi+ 5.4069986	16.6792	2.37094e-07	1.74982e-06
	limit Esi+ 1.535	13.9077	2.4105e-07	1.77278e-06
	limit Esi+ 1.7000003	18.1665	2.46769e-07	1.80849e-06
	Arachidonoyl dopamine	15.7422	2.49898e-07	1.82504e-06
	MG(0:0/16:1(9Z)/0:0) Esi+ 4.23	15.842	2.51737e-07	1.83208e-06
	C15 H21 O11 Esi+ 8.071003	18.3416	2.64665e-07	1.91951e-06
	limit Esi+ 4.515	17.5079	2.69773e-07	1.94981e-06
	N2'-Acetylgentamicin C1a Esi+ 5.447002	13.0274	2.89526e-07	2.07952e-06
	Moxifloxacin	14.2825	2.89705e-07	2.07952e-06
	Plantagoside	14.1212	2.93963e-07	2.10289e-06
	C15 H21 O11	18.3676	3.24628e-07	2.31436e-06
	Azidopine	19.1188	3.46203e-07	2.4598e-06
	limit Esi+ 1.7429997	19.433	3.66424e-07	2.59468e-06
	C11 H25 N5 O4	18.4488	3.72864e-07	2.63139e-06
	D-Urobilinogen	16.4601	3.78803e-07	2.66433e-06
	PIP(18:1(11Z)/16:0)	15.4049	3.94598e-07	2.76614e-06
	C30 H42 N6 O7	19.2822	4.08368e-07	2.85313e-06
	Megalomicin C2	19.3919	4.13888e-07	2.88209e-06
	C32 H33 O10	13.7488	4.16723e-07	2.89222e-06
	C24 H13 N7 O16	14.1615	4.2234e-07	2.92153e-06
	LysoPE(0:0/20:0) Esi+ 1.6819994	16.125	4.24053e-07	2.92373e-06
	C24 H19 N2 O11	14.8611	4.70454e-07	3.23302e-06
	DG(14:1(9Z)/16:0/0:0) Esi+ 1.4090003	16.5214	4.73505e-07	3.23551e-06
	C20 H23 N19 O4	14.3661	4.73903e-07	3.23551e-06
	L-Galactose Esi+ 6.636997	18.4131	4.85836e-07	3.30621e-06
	Cefroxadine	15.6135	5.27359e-07	3.57716e-06
	C33 H53 O12	19.6084	5.45462e-07	3.68803e-06
	Formylmethionyl-leucyl-phenylalanine methyl ester	14.1995	5.691e-07	3.83548e-06
	C34 H45 N4 O	15.2253	5.71782e-07	3.8412e-06
	4-Prenylresveratrol	14.2624	5.91496e-07	3.9582e-06
	PE(18:2(9Z,12Z)/16:0)	20.9679	5.92974e-07	3.9582e-06
	N-Isopropylammelide	15.6145	6.00349e-07	3.9947e-06
	Penicillenic acid	14.2623	6.03683e-07	4.00418e-06
	Taurohyocholic acid Esi+ 1.7459996	14.966	6.0683e-07	4.01235e-06
	Alangimarine	14.7126	7.41471e-07	4.88718e-06
	1,2-Dimethoxy-4-[2-(2-propenyloxy)ethenyl]-benzene	15.9695	7.47631e-07	4.91233e-06
	C22 H43 N9	15.2405	7.52416e-07	4.92833e-06
	Fruticosonine	16.2553	7.84824e-07	5.12458e-06
	none Esi+ 7.2960005	14.5686	7.90716e-07	5.14702e-06
	C25 H47 N O4	15.6773	7.99486e-07	5.17276e-06
	PE(22:2(13Z,16Z)/15:0) Esi+ 2.1259997	22.4653	7.99605e-07	5.17276e-06
	C18 H41 N7 O	19.5022	8.02128e-07	5.17311e-06
	limit Esi+ 7.2879972 :158	14.3529	8.65218e-07	5.5484e-06
	PIP(16:0/18:1(11Z))	15.3752	8.65613e-07	5.5484e-06
	N-Acetyl-a-neuraminic acid	19.4854	8.87813e-07	5.67334e-06
	C21 H43 N16 O9	15.9732	9.37635e-07	5.97351e-06
	2-Aminoacridone	16.3522	9.5205e-07	6.04696e-06
	N?-Acetyl-L-arginine Esi+ 7.3200045	14.9941	9.60325e-07	6.08109e-06
	TG(20:4(5Z,8Z,11Z,14Z)/18:1(9Z)/22:5(7Z,10Z,13Z,16Z,19Z))[iso6]	13.7642	9.78733e-07	6.17899e-06
	C36 H65 N8 O	17.5497	9.92595e-07	6.24768e-06
	limit Esi+ 4.4570003	16.2213	1.00924e-06	6.31983e-06
	UK-47265	19.5941	1.01009e-06	6.31983e-06
	limit Esi+ 5.070003	15.773	1.20007e-06	7.48612e-06
	limit Esi+ 7.291996 :20	15.8903	1.23526e-06	7.6828e-06
	C29 H49 N3 O11	17.8741	1.26312e-06	7.83285e-06
	Fruticosonine Esi+ 1.3139994	16.2424	1.27165e-06	7.85731e-06
	C25 H44 N5 O4 S	14.8218	1.27456e-06	7.85731e-06
	limit Esi+ 3.610999	19.95	1.34135e-06	8.24476e-06
	limit Esi+ 7.3060007 :50	15.1859	1.35222e-06	8.28728e-06
	MG(0:0/18:2(9Z,12Z)/0:0)	15.8326	1.37291e-06	8.38953e-06
	Hydroxychlorobactene glucoside	16.7997	1.40566e-06	8.5647e-06
	limit Esi+ 7.5180025	13.8476	1.44297e-06	8.76658e-06
	C35 H63 N7 O	16.8672	1.52606e-06	9.24455e-06
	C16 H28 N3 O	16.2274	1.56491e-06	9.4526e-06
	4-Demethylpremithramycinone	13.3691	1.65906e-06	9.99251e-06
	limit Esi+ 2.0979998	18.731	1.70352e-06	1.02309e-05
	limit Esi+ 7.283 :157	13.9261	1.92184e-06	1.14882e-05
	LysoPE(0:0/16:1(9Z)) Esi+ 4.6040025	15.1206	1.92383e-06	1.14882e-05
	PE(20:4(5Z,8Z,11Z,14Z)/20:3(5Z,8Z,11Z))	14.749	1.97677e-06	1.17708e-05
	2,2-Dibutyl-3-(4-methoxyphenyl)-4-methyl-2H-1-benzopyran-7-ol acetate Esi+ 4.6239977	16.832	2.01229e-06	1.19483e-05
	DG(16:0/18:3(6Z,9Z,12Z)/0:0)	19.2333	2.15184e-06	1.27408e-05
	limit Esi+ 7.2879972	15.4673	2.2924e-06	1.35349e-05
	CE(20:1(11Z))	12.2464	2.33258e-06	1.37334e-05
	(R)-Salsolinol	15.7093	2.36215e-06	1.38685e-05
	limit Esi+ 9.054996	14.272	2.38945e-06	1.39896e-05
	alpha-Allokainic acid	15.5681	2.43842e-06	1.42366e-05
	Pefloxacine	14.8893	2.45309e-06	1.42824e-05
	FMNH	15.2759	2.46185e-06	1.42937e-05
	2,2-Dibutyl-3-(4-methoxyphenyl)-4-methyl-2H-1-benzopyran-7-ol acetate Esi+ 4.6269994 :44	16.9065	2.48945e-06	1.44141e-05
	4-Hydroxydebrisoquine	14.9648	2.55997e-06	1.47815e-05
	Integerressine Esi+ 5.544002	15.6931	2.71267e-06	1.56202e-05
	Allantoate	17.3983	2.88267e-06	1.65536e-05
	limit Esi+ 2.0790002	17.3598	2.89517e-06	1.658e-05
	Allantoate Esi+ 4.294001	17.3878	2.94687e-06	1.68301e-05
	Nandrolone phenpropionate	14.6656	2.96787e-06	1.69039e-05
	C4 H9 O5	17.3766	3.08772e-06	1.75389e-05
	C7 H15 N O2	16.2675	3.19702e-06	1.81107e-05
	Streptozocin	17.7182	3.21097e-06	1.81407e-05
	2-Aminoacridone Esi+ 10.067995	16.2459	3.23833e-06	1.82461e-05
	Beta-d-lactose Esi+ 7.710001	19.2416	3.3181e-06	1.86454e-05
	C33 H14 N6 O2	13.2119	3.54731e-06	1.98718e-05
	Mannose 1-phosphate	18.8902	3.55531e-06	1.98718e-05
	Streptamine	16.8762	3.56553e-06	1.98759e-05
	9-Chloro-11beta,17beta-dihydroxy-17-methylandrost-4-en-3-one	13.211	3.68177e-06	2.04695e-05
	2-Aminoethylphosphocholate	16.3349	3.87397e-06	2.14811e-05
	PE(18:1(11Z)/16:0) Esi+ 2.222	21.7615	3.92809e-06	2.17036e-05
	Salithion	19.0973	3.9428e-06	2.17036e-05
	Milbemectin	16.0377	3.94518e-06	2.17036e-05
	Avermectin A1a monosaccharide Esi+ 3.9299986	14.1865	4.02449e-06	2.2082e-05
	C23 H53 N16	17.9318	4.37524e-06	2.39439e-05
	7-Methyl-3-oxooctanoyl-CoA	15.5315	4.64622e-06	2.53606e-05
	limit Esi+ 4.6900015	16.8234	4.75288e-06	2.58754e-05
	CDP-ethanolamine	14.4837	4.78206e-06	2.59668e-05
	Butoctamide hydrogen succinate Esi+ 7.6530013	14.2552	5.06144e-06	2.74129e-05
	C39 H85 N9 O4	16.2332	5.30253e-06	2.86446e-05
	Physostigmine Esi+ 6.477998	13.5649	5.81101e-06	3.13108e-05
	PE(20:4(5Z,8Z,11Z,14Z)/20:3(5Z,8Z,11Z)) Esi+ 6.647002	14.5862	5.88271e-06	3.16158e-05
	C7 H3 S	15.2829	6.27086e-06	3.36157e-05
	L-Histidinol	16.8141	6.46126e-06	3.45479e-05
	C23 H29 N9 O10	13.9256	6.48096e-06	3.45651e-05
	limit Esi+ 7.287	15.916	6.502e-06	3.45893e-05
	Medicarpin 3-O-glucoside-6'-malonate	13.7175	6.57036e-06	3.48645e-05
	LysoPE(0:0/16:1(9Z)) Esi+ 1.8250002	15.6398	7.07865e-06	3.74668e-05
	limit Esi+ 8.287997	14.5955	7.12443e-06	3.76141e-05
	Pyrazosulfuron	17.1718	7.21573e-06	3.80004e-05
	Trolamine	19.991	7.38082e-06	3.87724e-05
	PIP(18:2(9Z,12Z)/18:0)	14.6488	7.59944e-06	3.9821e-05
	limit Esi+ 7.309001	15.4338	7.90315e-06	4.12436e-05
	C26 H24 N20 O4 S2	16.0036	7.91027e-06	4.12436e-05
	alpha-Allokainic acid Esi+ 4.914998	15.7137	7.96774e-06	4.14402e-05
	CE(22:1(13Z))	14.794	8.38883e-06	4.35223e-05
	B-Norcholest-4-en-3-one	18.1929	8.58224e-06	4.44158e-05
	C25 H51 N3 O6 S Esi+ 3.774001	21.5563	8.6301e-06	4.45031e-05
	C47 H77 N3	16	8.64158e-06	4.45031e-05
	3,4-Dihydro-3-hydroxy-4-S-glutathionyl bromobenzene	20.0214	8.9183e-06	4.58156e-05
	Deacetyldiltiazem	16.6078	9.05476e-06	4.64029e-05
	PE(15:0/18:1(9Z))	19.5273	9.33737e-06	4.77344e-05
	C39 H80 N6	15.5194	9.77862e-06	4.98686e-05
	C36 H69 N S	18.703	9.85966e-06	5.01598e-05
	Eupacunin	21.215	1.02567e-05	5.20534e-05
	C24 H41 N3 O18	15.3661	1.02871e-05	5.20818e-05
	18-hydroxy-9Z-octadecenoic acid	19.491	1.13935e-05	5.7544e-05
	Inositol cyclic phosphate	15.5856	1.20049e-05	6.04863e-05
	C35 H47 N5 O	15.2744	1.27444e-05	6.40582e-05
	C9 H18 N4 O7	16.8171	1.28206e-05	6.42872e-05
	PE(20:2(11Z,14Z)/15:0)	23.0925	1.34038e-05	6.70126e-05
	C33 H71 N10 O	13.6626	1.34281e-05	6.70126e-05
	Pergolide	18.461	1.51248e-05	7.53007e-05
	C33 H65 N4 O4	19.286	1.54296e-05	7.66363e-05
	C15 H17 N3 O17 S	20.0247	1.55924e-05	7.72618e-05
	Trolamine Esi+ 6.097	19.3876	1.57941e-05	7.80765e-05
	C8 H5 S	20.1001	1.59548e-05	7.86853e-05
	C23 H45 N O4	15.0231	1.62198e-05	7.98043e-05
	C28 H51 N8	17.5366	1.62735e-05	7.98812e-05
	2,2-Dibutyl-3-(4-methoxyphenyl)-4-methyl-2H-1-benzopyran-7-ol acetate Esi+ 4.6260023	16.919	1.63573e-05	8.01048e-05
	C23 H29 N O18	16.1758	1.681e-05	8.19692e-05
	Deoxyadenosine	22.0869	1.68162e-05	8.19692e-05
	Inosine Esi+ 5.235	17.3957	1.86115e-05	9.05097e-05
	C24 H25 N O10	14.6918	1.97805e-05	9.58352e-05
	C24 H36 N6 O3	15.677	1.9798e-05	9.58352e-05
	C20 H39 N4 O3	18.8941	2.04924e-05	9.89677e-05
	Flupoxam	13.8863	2.11084e-05	0.000101709
	PG(16:1(9Z)/18:2(9Z,12Z))	19.8444	2.19673e-05	0.000105604
	C45 H83 N4 O2	13.7937	2.22732e-05	0.00010683
	ADP-ribose 2'-phosphate	15.215	2.28041e-05	0.000109126
	cyclohexylammonium	14.2521	2.31565e-05	0.000110561
	3beta-hydroxy-4beta-methyl-5alpha-cholest-7-ene-4alpha-carbaldehyde	14.9249	2.50201e-05	0.000119187
	dTDP-D-mycaminose Esi+ 3.7940004	16.9438	2.6047e-05	0.000123517
	dTDP-D-mycaminose Esi+ 3.7920015	16.9438	2.6047e-05	0.000123517
	dTDP-D-mycaminose	16.9436	2.62449e-05	0.000124174
	C30 H35 N5	20.2228	2.70228e-05	0.000127567
	p-Nitrophenyl-O-ethyl ethylphosphonate	20.939	2.72351e-05	0.00012828
	C30 H19 N14	13.6146	2.76344e-05	0.000129869
	Inosine	22.0045	2.83578e-05	0.000132971
	Deoxylimononic acid D-ring-lactone	15.0907	2.92483e-05	0.00013684
	Glucosylceramide (d18:1/24:0)	14.623	2.93632e-05	0.000137072
	Robinetinidol-(4alpha-8)-catechin-(6-4alpha)-robinetinidol	15.2868	3.00758e-05	0.000140086
	Deoxyguanosine	24.9967	3.0157e-05	0.000140153
	C20 H39 N4 O2	19.6862	3.15017e-05	0.000145782
	N6,N6-Dimethyladenosine Esi+ 6.6040025	16.6186	3.15073e-05	0.000145782
	C31 H52 S	18.0915	3.16896e-05	0.000146303
	PE(15:0/18:0)	19.0842	3.18304e-05	0.00014663
	Dodecaprenyl diphosphate	14.2144	3.25915e-05	0.00014959
	none Esi+ 6.793	13.7373	3.26158e-05	0.00014959
	DG(14:0/14:1(9Z)/0:0)	19.2797	3.31662e-05	0.000151716
	limit Esi+ 7.3200045	14.7001	3.32241e-05	0.000151716
	C24 H27 N7 O18	16.6044	3.41314e-05	0.00015552
	C20 H39 N20 O5 Esi+ 4.9270015	19.7175	3.52468e-05	0.000160254
	Swainsonine	14.3435	3.56845e-05	0.000161893
	D-Aspartic acid	17.5915	3.83271e-05	0.000173507
	limit Esi+ 7.291996 :88	14.8389	3.84547e-05	0.000173709
	C14 H39 N16 O4	20.9484	3.89012e-05	0.000175348
	PE(20:0/14:1(9Z)) Esi+ 1.6460001	18.7305	3.90981e-05	0.000175858
	limit Esi+ 1.7509997	18.1184	4.06278e-05	0.000182347
	C20 H35 N7	16.2476	4.07927e-05	0.000182529
	PE(18:1(11Z)/15:0)	20.772	4.08427e-05	0.000182529
	limit Esi+ 1.2270002	16.654	4.09517e-05	0.000182627
	D-Sorbitol Esi+ 4.48	14.9686	4.23149e-05	0.000188206
	PE(22:0/P-18:1(9Z))	17.7977	4.23822e-05	0.000188206
	D-Hamamelose Esi+ 6.085999	16.8767	4.28297e-05	0.000189791
	limit Esi+ 7.208004	14.6559	4.34803e-05	0.000192267
	LysoPE(0:0/18:2(9Z,12Z)) Esi+ 4.097	21.419	4.54467e-05	0.000200539
	C21 H29 N3 O16	16.6887	4.56453e-05	0.000200993
	limit Esi+ 7.3189993	14.6929	4.66457e-05	0.000204967
	4-Hydroxyphenylacetylglutamine Esi+ 9.514005	15.1389	4.68278e-05	0.000205337
	C7 H15 N8 O S	14.7033	4.80847e-05	0.000210408
	Levofuraltadone Esi+ 7.9979978	15.605	4.86335e-05	0.000212366
	limit Esi+ 7.291996 :32	15.8036	4.93215e-05	0.000214923
	C21 H45 N3 O9	15.2374	5.15447e-05	0.000224145
	limit Esi+ 1.2970006	15.0044	5.22998e-05	0.000226957
	4-Hydroxyphenylacetylglutamine	15.1367	5.42099e-05	0.00023476
	DG(20:1(11Z)/24:0/0:0)	14.7376	5.66917e-05	0.000245002
	LysoPE(18:2(9Z,12Z)/0:0)	23.052	5.69903e-05	0.000245785
	10-Deoxymethynolide	13.7797	5.76893e-05	0.000248289
	Crinamidine	14.6264	6.06795e-05	0.000260624
	none Esi+ 1.3580006	14.883	6.09325e-05	0.000261175
	Adiantifoline	15.7343	6.24987e-05	0.000267342
	O-Phosphorylethanolamine	19.2066	6.28557e-05	0.000268321
	D-Sorbitol	14.9615	6.31906e-05	0.000269202
	C33 H41 N11 O3	18.9048	6.46764e-05	0.000274973
	C20 H39 N20 O5	20.1104	6.52412e-05	0.000276813
	DG(14:1(9Z)/18:1(9Z)/0:0)	19.1155	6.92303e-05	0.000293145
	C24 H21 N13 O10	13.7803	6.94322e-05	0.000293407
	Haloxyfop methyl	19.6464	7.2129e-05	0.00030419
	Mannopine	16.2566	7.26e-05	0.000305561
	Irilone	13.6117	7.407e-05	0.000311124
	C20 H14 N3 O18	15.4013	7.49576e-05	0.000314222
	limit Esi+ 1.625	12.8601	7.67653e-05	0.000321158
	limit Esi+ 7.289998 :42	15.2007	7.73545e-05	0.000322978
	C39 H82 N11 O2	15.7635	7.85848e-05	0.000327463
	C38 H81 N8 O2	14.7392	8.11065e-05	0.0003373
	DG(18:1(9Z)/18:3(6Z,9Z,12Z)/0:0) Esi+ 4.6669974	18.0355	8.26798e-05	0.000343162
	limit Esi+ 7.2980013	15.032	8.33675e-05	0.000345333
	C19 H38 N8 O	17.2434	8.46835e-05	0.000350092
	limit Esi+ 7.287 :46	15.3944	8.96964e-05	0.000370086
	Actinorhodin Esi+ 7.2940035	14.8209	9.13273e-05	0.000376075
	limit Esi+ 7.3099985	16.3913	9.28314e-05	0.000381519
	limit Esi+ 1.6460001	16.5405	9.35138e-05	0.000383571
	C25 H45 N O4	15.0672	9.46431e-05	0.000387445
	limit Esi+ 7.0919995	16.1123	9.68651e-05	0.000395768
	6-methyltetrahydropterin	15.16	9.72444e-05	0.000396545
	2,2-Dibutyl-3-(4-methoxyphenyl)-4-methyl-2H-1-benzopyran-7-ol acetate Esi+ 4.6269994	16.8906	9.81722e-05	0.000399551
	C21 H49 N14 O3 S	17.571	9.83676e-05	0.000399571
	limit Esi+ 6.5209975	13.0142	0.000105941	0.000429503
	C44 H18 N10 O	16.1754	0.000107288	0.000434122
	Levan Esi+ 8.339997	17.8148	0.000107893	0.000435729
	Integerressine Esi+ 5.544002 :101	15.5733	0.000111346	0.000448811
	limit Esi+ 7.287 :108	14.7917	0.000111568	0.000448843
	Chinomethionat	17.8792	0.000111899	0.000449309
	C7 H13 N6 O2	15.263	0.000114531	0.000458999
	C29 H45 N9 O2	17.693	0.000115415	0.000461658
	PE(18:0/14:1(9Z))	21.362	0.000117885	0.000470641
	C32 H63 N O2 S2	17.6695	0.00011849	0.000472157
	C29 H37 N10 O	16.8005	0.000121002	0.000481254
	PE(20:2(11Z,14Z)/15:0) Esi+ 2.1709998	21.7664	0.000125112	0.000496658
	PE(16:0/15:0)	17.8529	0.000126911	0.000502846
	Hypoxanthine	21.1097	0.000132336	0.000523352
	limit Esi+ 7.1060004 :76	14.3041	0.000132793	0.000524169
	C41 H84 N7 O S	16.6018	0.000133631	0.000526485
	C14 H22 N7 O11 S	16.4226	0.000138426	0.000544354
	C32 H54 N4	17.8112	0.000146282	0.000574171
	3-oxo-hexanoyl-CoA	16.1794	0.000149811	0.000586397
	Perseitol	21.0053	0.000149957	0.000586397
	limit Esi+ 7.3099985 :57	14.7023	0.000151737	0.000591537
	Enilconazole	16.3757	0.000151835	0.000591537
	N-Succinyl-2-amino-6-ketopimelate	15.4752	0.000153345	0.000596312
	C12 H20 N O2	19.1808	0.000155014	0.000601682
	Isoalangiside	12.2586	0.000156457	0.000606161
	limit Esi+ 1.6259997	12.9306	0.000157688	0.000609806
	Triflusulfuron-methyl	14.6759	0.000158735	0.000612722
	C12 H15 N9 O9	15.4062	0.000162182	0.000624879
	Jadomycin B Esi+ 10.4349985	16.7576	0.000163952	0.000630539
	2-Methylacetoacetyl-CoA Esi+ 7.334002	15.2195	0.000164686	0.000632203
	C28 H56 N14	15.7953	0.000169239	0.000648254
	C24 H14 N11 O	12.8078	0.000169486	0.000648254
	limit Esi+ 7.2879972 :35	15.1716	0.000169864	0.000648515
	Orobanchoside	13.1412	0.00017107	0.000650841
	UDP-N-acetyl-2-amino-2-deoxy-D-glucuronate	19.3757	0.000171296	0.000650841
	C29 H41 N	14.7318	0.000171405	0.000650841
	none Esi+ 6.811002	15.5865	0.00017248	0.00065374
	limit Esi+ 7.1109962 :130	14.3194	0.000176163	0.000666494
	PE(22:2(13Z,16Z)/15:0)	23.5253	0.000185091	0.00069901
	Biotripyrrin-b	12.9554	0.00018989	0.000715846
	Inosine Esi+ 8.160003	16.0919	0.000190853	0.000718183
	PE(22:6(4Z,7Z,10Z,13Z,16Z,19Z)/22:2(13Z,16Z))	14.7247	0.000194404	0.000730235
	limit Esi+ 6.1049986	15.7671	0.000196089	0.000735245
	(5b,7a,12a)-2-(3-methoxyphenyl)-2-oxoethyl ester-7,12-dihydroxy-cholan-24-oic acid	16.1958	0.000200074	0.000748847
	C22 H26 N4 O22	17.5964	0.000201256	0.000751931
	PIP(18:1(9Z)/18:1(9Z))	15.8577	0.000208097	0.000775284
	C26 H20 N17 O10	15.343	0.000208247	0.000775284
	Luteolin 7-O-(6''-malonylglucoside)	18.4331	0.000210518	0.000782349
	Deoxycholic acid glycine conjugate	15.9506	0.000218366	0.000810082
	limit Esi+ 7.3210015 :70	14.5053	0.000220262	0.000815668
	Levan	17.8357	0.00022144	0.000818586
	C32 H12 N10 O5	17.9952	0.000223212	0.000823684
	C5 H9 N2 O5	17.5005	0.000225158	0.000828412
	none Esi+ 7.2940035 :97	13.3756	0.000225501	0.000828412
	C30 H57 O12 S	20.5431	0.000225679	0.000828412
	limit Esi+ 7.289998	15.2114	0.000234082	0.000857754
	limit Esi+ 1.6300002	13.047	0.00023922	0.000875053
	PE(20:1(11Z)/15:0)	22.821	0.000240116	0.000876132
	C35 H59 N3 O2	18.1859	0.000240351	0.000876132
	N-Acetyl-N6,O-didemethylpuromycin-5'-phosphate	13.1462	0.000245126	0.000891987
	3-O-Acetylhamayne	18.2132	0.000247077	0.000897526
	Pirbuterol	14.0636	0.000253768	0.000920238
	none Esi+ 7.101	14.8606	0.000264249	0.000956591
	C22 H46 Cl2 N11 O8	13.9113	0.000266382	0.000962649
	Salannin Esi+ 5.5059977	19.525	0.000267802	0.000965629
	Jamaicamide A	15.5053	0.00026814	0.000965629
	Dihydrostreptomycin 6-phosphate	19.7326	0.000268589	0.000965629
	Meloside A	14.3039	0.000270099	0.000969395
	limit Esi+ 1.6650006	18.9134	0.000274781	0.000984514
	Cinchonain Ib	15.6348	0.000279563	0.000999939
	Adenosine 2'-phosphate	22.3722	0.000284855	0.00101713
	limit Esi+ 7.3399973	13.9573	0.000286389	0.00102087
	3-Hydroxy-L-tyrosyl-AMP	15.4946	0.00029256	0.0010411
	limit Esi+ 1.758	18.4016	0.000294551	0.00104641
	C42 H63 N6 O3	14.1806	0.000296032	0.00104989
	limit Esi+ 7.289998 :81	13.7426	0.000296785	0.00105078
	Carbamazepine-o-quinone	16.5895	0.000297992	0.00105328
	N2'-Acetylgentamicin C1a Esi+ 5.447002 :114	12.9788	0.000299208	0.00105468
	C33 H13 N13	16.1097	0.000299395	0.00105468
	limit Esi+ 7.328002	14.1954	0.000300578	0.00105707
	C5 H13 N4 O2	20.0957	0.000301292	0.0010578
	limit Esi+ 4.3939986	16.7515	0.000301898	0.00105816
	C-1027 Chromophore	14.8441	0.000311802	0.00109105
	C29 H23 N17 O	12.6017	0.000315029	0.0011005
	C26 H16 N9 O14	13.8005	0.000316561	0.00110401
	limit Esi+ 7.3250003	14.67	0.000320845	0.0011171
	TG(16:0/14:0/16:1(9Z))[iso6] Esi+ 7.291996	15.3361	0.00032347	0.00112437
	D-Hamamelose Esi+ 6.085999 :61	16.9403	0.000326043	0.00113143
	C17 H37 N9 O2	18.4223	0.000335981	0.00116399
	p-Hydroxyfelbamate	16.5718	0.00035144	0.00121554
	limit Esi+ 7.296998	14.1729	0.000364228	0.0012577
	MG(0:0/18:2(9Z,12Z)/0:0) Esi+ 1.7089999	15.8442	0.000369761	0.0012747
	L-Glutamate	21.5428	0.000373021	0.0012807
	4-(beta-Acetylaminoethyl)imidazole	19.026	0.000373193	0.0012807
	limit Esi+ 1.6430005	17.1125	0.000373334	0.0012807
	Etoposide	14.1414	0.000378957	0.00129787
	C6 N O S2	15.5327	0.000380968	0.00130263
	C40 H83 Cl N5 O2	14.4533	0.000384382	0.00131216
	limit Esi+ 7.338001	14.2628	0.00038896	0.00132563
	C19 H19 N14 O6	14.4931	0.000392906	0.0013369
	limit Esi+ 7.309001 :71	14.6278	0.000407327	0.00138372
	Prednimustine	14.0504	0.000411312	0.00139211
	limit Esi+ 7.291996 :33	15.492	0.00041138	0.00139211
	LysoPE(0:0/18:2(9Z,12Z))	22.8407	0.000411789	0.00139211
	none Esi+ 7.316999	15.3463	0.000417344	0.00140862
	C38 H74 N O	15.263	0.000438117	0.00147616
	Salannin Esi+ 5.4100027	17.8841	0.000438762	0.00147616
	none Esi+ 7.1020007	14.8181	0.000446235	0.00149889
	Fructoselysine	15.8895	0.000449757	0.001507
	N3'-Acetyltobramycin	16.5476	0.000450088	0.001507
	1,2-Dihydroxyfluorene	14.2203	0.000454847	0.00152051
	C32 H49 N3	16.9987	0.00045694	0.00152507
	limit Esi+ 7.1000023	17.143	0.00046475	0.00154818
	none Esi+ 7.1000023	15.7246	0.00046578	0.00154818
	C42 H83 N2 O2	14.3521	0.00046608	0.00154818
	C25 H22 N17 O6 S2	15.4241	0.00047095	0.00156189
	22-Oxo-docosanoate	20.0251	0.000475148	0.00157332
	DG(16:1(9Z)/18:1(11Z)/0:0) Esi+ 4.73	18.6529	0.000484237	0.00159938
	C31 H31 N O	12.7356	0.000484544	0.00159938
	Cassaidine	16.8341	0.000486591	0.00160361
	PE(18:1(9Z)/16:1(9Z))	22.6825	0.000502414	0.00165316
	C6 H12 O10	17.0922	0.000505298	0.00166004
	limit Esi+ 7.2879972 :145	14.5261	0.000512371	0.00168064
	Serratine	16.1111	0.000520876	0.00170487
	Lacto-N-triaose	15.0149	0.000521385	0.00170487
	DG(14:1(9Z)/16:0/0:0)	20.1114	0.000536255	0.00174858
	CE(22:2(13Z,16Z))	13.4286	0.000536421	0.00174858
	C37 H79 N4 O2	13.2867	0.000564894	0.00183854
	C20 H43 N21 O5	14.4503	0.000567232	0.00184328
	PE(20:2(11Z,14Z)/15:0) Esi+ 2.1709998 :0	21.772	0.000575212	0.00186632
	Salannin Esi+ 5.507999	18.9418	0.000586991	0.0019016
	limit Esi+ 7.101 :43	14.9892	0.000602864	0.00195001
	none Esi+ 7.2940035	13.6456	0.000609735	0.00196919
	C13 H23 N O2	18.7643	0.000611417	0.00197044
	Molybdopterin guanine dinucleotide	13.701	0.000612003	0.00197044
	Neohesperidin	13.7964	0.000629114	0.00202243
	2,2,4-Trimethyl-3-(4-fluorophenyl)-2H-1-benzopyran-7-ol acetate	20.6574	0.000637251	0.00204545
	C13 H25 N O3	18.9759	0.00064542	0.0020685
	Propamocarb	14.5797	0.000649965	0.00207673
	Demethyllactenocin	14.6552	0.000649968	0.00207673
	limit Esi+ 1.271 :55	15.8825	0.000658703	0.00210143
	limit Esi+ 7.095998	15.2491	0.000662578	0.00211058
	Ivermectin B1a	15.3826	0.00068496	0.00217857
	limit Esi+ 7.096998 :83	14.6565	0.000701269	0.00222706
	C42 H86 Cl N O	13.4784	0.00070741	0.00224045
	C40 H83 N3 O3 S	13.9548	0.000707622	0.00224045
	limit Esi+ 7.289998 :37	15.7074	0.000722887	0.00228291
	Pyrazophos	18.5333	0.000723211	0.00228291
	none Esi+ 7.101 :80	14.2126	0.000731011	0.00230406
	1-dodecanoyl-sn-glycerol	16.3448	0.000732763	0.00230611
	Gatifloxacin	16.0168	0.000734305	0.0023075
	C21 H17 N4 O18	14.5752	0.00073899	0.00231875
	limit Esi+ 7.1069975	14.5116	0.000741889	0.00232436
	limit Esi+ 7.270997	13.6302	0.00076252	0.00238544
	limit Esi+ 7.291996 :58	14.6413	0.000764721	0.00238876
	PE(14:1(9Z)/14:0)	14.6341	0.000809538	0.00252497
	limit Esi+ 7.3210015	16.7169	0.000810736	0.00252497
	Flavin adenine dinucleotide (FAD) Esi+ 3.8109999	16.7293	0.000820255	0.00255082
	C14 H18 N5 O15	13.7143	0.000823788	0.00255801
	Flavin adenine dinucleotide (FAD) Esi+ 3.8109999 :49	16.7297	0.000829386	0.00257159
	DG(22:0/18:4(6Z,9Z,12Z,15Z)/0:0)	13.655	0.000846156	0.00261971
	Isopentenyl pyrophosphate	14.6632	0.000852372	0.00263506
	limit Esi+ 7.1040025 :87	13.8819	0.000857884	0.00264819
	Norbinaltorphimine	15.4276	0.000876141	0.00270058
	2-Aminoethylphosphocholate Esi+ 3.8809981	15.735	0.000880675	0.00271057
	Anopterine Esi+ 5.3800015	16.9016	0.000888127	0.00272949
	Cromolyn	18.2438	0.000896953	0.00275258
	none Esi+ 7.1779985	14.3081	0.000904001	0.00277016
	PE(15:0/18:0) Esi+ 2.2229998	18.3955	0.000906743	0.0027745
	C27 H45 N12 O	17.5992	0.000924805	0.00282564
	1-Aminocyclohexanecarboxylic acid	16.4164	0.000942672	0.00287604
	limit Esi+ 7.309001 :125	14.7864	0.000952827	0.0029028
	C33 H70 N15 O3	16.1331	0.00100347	0.00305264
	Mycinamicin VII	14.2427	0.00100557	0.00305424
	limit Esi+ 7.1020007	13.7662	0.00100691	0.00305424
	limit Esi+ 7.1040025 :106	13.5761	0.00100964	0.00305811
	Mycalamide B	15.5074	0.00102226	0.00308912
	Methaphenilene	15.1617	0.0010229	0.00308912
	C47 H81 N	14.5269	0.00102529	0.00308912
	PE(24:0/20:3(5Z,8Z,11Z)) Esi+ 3.6029983	15.6195	0.00102578	0.00308912
	C49 H15 N4	15.75	0.00103525	0.00311318
	DG(14:1(9Z)/20:0/0:0) Esi+ 4.7440023	16.6763	0.0010419	0.00312867
	C20 H25 N7 O11	14.3597	0.00104399	0.00313048
	3-Hexaprenyl-4,5-Dihydroxybenzoic acid	15.031	0.00104913	0.0031414
	C30 H17 N12 O6	13.3603	0.00105148	0.00314393
	C10 H21 N7 O	16.4512	0.00106407	0.00317705
	Inosine Esi+ 8.160003 :66	16.037	0.00106694	0.00318109
	C22 H25 N6 O17	16.7375	0.00112217	0.00334101
	Rottlerin	13.9423	0.00112538	0.00334582
	C19 H25 N6 O18 S	15.4239	0.00113203	0.00336082
	Theophylline Esi+ 8.3429985	17.1714	0.00113372	0.00336108
	limit Esi+ 7.1060004	15.5557	0.00114928	0.00340237
	limit Esi+ 3.612	19.1141	0.00116079	0.00343163
	limit Esi+ 4.358001	16.3716	0.00116333	0.00343428
	none Esi+ 6.796001	13.6464	0.00118283	0.00348694
	Isoguanosine	17.1326	0.00118697	0.00349423
	2-Hydroxymyristic Acid Esi+ 3.938002	14.909	0.00119672	0.00351798
	C16 H29 N6 O14 S2	15.6335	0.00120286	0.00353108
	C23 H54 N16	17.573	0.00121486	0.00356132
	C27 H55 N4 O3	14.0656	0.00122176	0.00357655
	C6 H20 N5 O3	19.1602	0.00122714	0.00358728
	ADP-D-glycero-D-manno-heptose	17.2767	0.00124237	0.00362675
	C21 H23 N3 O22	19.1611	0.0012483	0.00363899
	none Esi+ 7.1040025	16.2985	0.00126176	0.00367311
	limit Esi+ 7.287 :63	13.6164	0.00127187	0.00369741
	Pristinamycin IA	14.708	0.0012822	0.00371439
	D-Urobilin Esi+ 5.4550014	16.966	0.00128284	0.00371439
	limit Esi+ 7.002001	13.1092	0.00128302	0.00371439
	Phosphophosphinate	17.1782	0.00130435	0.0037679
	C37 H23 N11 O4	18.6433	0.0013051	0.0037679
	C21 H13 N9 O6	13.3231	0.0013085	0.00377252
	limit Esi+ 7.1040025 :65	14.7052	0.00131964	0.00379942
	limit Esi+ 7.3029985	15.8059	0.00132417	0.00380721
	limit Esi+ 7.3220005	15.3136	0.00132894	0.00381437
	C22 H43 O17 S5	15.4316	0.0013303	0.00381437
	limit Esi+ 7.099	15.8424	0.00133667	0.0038274
	L-Galactose Esi+ 8.345	16.2978	0.00134203	0.00383752
	O-Phosphorylethanolamine Esi+ 9.533998	19.124	0.00140161	0.00400241
	C3 H12 N4 O S	16.2713	0.00140353	0.00400244
	PE(15:0/14:0) Esi+ 2.3160012	14.3973	0.00142016	0.00404401
	limit Esi+ 7.3060007	15.3626	0.00142222	0.00404401
	C23 H19 N2 O24	18.8434	0.00142489	0.00404401
	Hydrocortisone cypionate	16.7912	0.00142582	0.00404401
	Pectenotoxin 1	14.0065	0.00142998	0.00405034
	limit Esi+ 7.332	14.5818	0.00144635	0.00409115
	limit Esi+ 4.7270007	17.2613	0.00145496	0.00410998
	C42 H74 O2 S2	14.8353	0.00145925	0.00411653
	D-Galactosamine	18.7675	0.0014712	0.00414468
	C19 H33 N14 O4 Esi+ 5.4100027 :47	15.9565	0.00150866	0.0042445
	C17 H40 N6 O Esi+ 1.2919999	17.7722	0.00151146	0.00424666
	limit Esi+ 7.096998	16.184	0.00152627	0.00428256
	PI(18:1(11Z)/16:1(9Z))	18.5527	0.001542	0.00432002
	Nystatin A1 Esi+ 4.746999	15.3562	0.00154514	0.00432002
	Aloesin	15.8549	0.00154581	0.00432002
	DG(22:6(4Z,7Z,10Z,13Z,16Z,19Z)/15:0/0:0)	15.0686	0.00157929	0.00440773
	C35 H21 N11 O2	20.0545	0.00160293	0.00446773
	N2-Acetyl-L-ornithine	15.7481	0.00160612	0.0044707
	C40 H82 O3 S	15.8638	0.00161256	0.00448265
	C44 H85 N3 O3	14.3718	0.00161821	0.00449242
	Aloesin Esi+ 7.3710012	15.8405	0.00166094	0.00460493
	C19 H33 N14 O4	15.9687	0.00167656	0.00464183
	C13 H16 N2 O11 S	17.8517	0.00167868	0.00464183
	PE(24:1(15Z)/14:1(9Z))	18.1343	0.00170744	0.00471199
	C36 H65 N8	18.2284	0.00170854	0.00471199
	Aflatoxin-M1-8,9-epoxide	19.0886	0.00179557	0.00494548
	limit Esi+ 6.147002	15.3887	0.00180044	0.00495239
	PE(20:3(5Z,8Z,11Z)/14:0) Esi+ 1.6360006	20.5844	0.00181849	0.00499548
	limit Esi+ 7.3309965 :133	14.0212	0.00183266	0.00502783
	C27 H19 N17 O3	18.7342	0.00185401	0.00507973
	DG(20:3(8Z,11Z,14Z)/24:0/0:0)	15.3988	0.00188884	0.00516841
	C11 H23 N4 O	19.0158	0.0018974	0.00517858
	CE(20:3(8Z,11Z,14Z))	13.9071	0.0018975	0.00517858
	none Esi+ 7.1080008	13.0995	0.00190174	0.00518341
	C29 H65 Cl N9 O2	17.1964	0.00191061	0.00520084
	limit Esi+ 7.082	18.4612	0.00192378	0.0052299
	L-Galactose Esi+ 4.9019976	19.5742	0.00192683	0.00523138
	5-Nitro-ortho-anisidine	14.4163	0.00194927	0.00528547
	N2'-Acetylgentamicin C1a Esi+ 5.3659983	12.6029	0.00195344	0.00528995
	Fortimicin AO	15.3605	0.00195698	0.00529267
	none Esi+ 7.095998 :104	13.9021	0.00197809	0.00534289
	L-Galactose Esi+ 4.9019976 :11	19.5712	0.00201753	0.00544239
	PE(20:1(11Z)/16:0) Esi+ 2.188001	19.743	0.00202233	0.00544834
	Zafirlukast	14.9553	0.00205576	0.00552552
	C33 H71 N8 O3	14.3697	0.00205625	0.00552552
	NS 1608	14.1121	0.00207845	0.005578
	limit Esi+ 7.291996 :78	14.7368	0.00210337	0.00563768
	C20 H36 N O22 S	17.7617	0.00211482	0.00566112
	C43 H71 N O3	14.948	0.00213699	0.00571316
	limit Esi+ 1.3839997	16.1063	0.00214378	0.00572402
	C49 H16 N4 O2	14.7766	0.00218208	0.00581888
	C34 H61 N5 O	20.1918	0.00219	0.00583259
	L-Galactose Esi+ 4.9019976 :19	19.5804	0.00221215	0.00588409
	9,10-Phenanthroquinone	15.0625	0.00221539	0.00588523
	limit Esi+ 7.2879972 :60	15.153	0.00225843	0.00599199
	Acetyl CoA	16.1438	0.00227452	0.00602703
	C43 H18 N4 O4	13.3788	0.00231407	0.00612409
	C9 H14 N3 O6	17.7783	0.00233367	0.00616389
	limit Esi+ 7.291996 :68	14.6885	0.00233534	0.00616389
	C35 H20 N15 O2 S	15.3594	0.00233792	0.00616389
	1-methylhistidine Esi+ 8.447	19.3918	0.002346	0.0061774
	limit Esi+ 7.0950003 :73	14.9229	0.00235008	0.0061804
	none Esi+ 7.313001	13.775	0.00236663	0.00621611
	Palatinose Esi+ 8.342002	19.3162	0.00237755	0.00623697
	limit Esi+ 7.287 :79	14.7327	0.0024461	0.006403
	Integerressine	16.6059	0.00244695	0.006403
	PE(16:1(9Z)/15:0)	17.0736	0.00246281	0.00643648
	none Esi+ 6.7839975	13.6289	0.00252471	0.00659003
	limit Esi+ 7.3289995	15.2738	0.00255218	0.00665344
	C19 H30 N5 O19 S	16.4878	0.00257172	0.00669099
	C39 H20 N12 O6	15.3287	0.00257297	0.00669099
	limit Esi+ 7.061002 :170	14.529	0.00259081	0.00672903
	2-Oxoarginine Esi+ 4.7070003	16.9005	0.00260162	0.00674875
	N-(3-oxo-octanoyl)-homoserine lactone	15.2629	0.002606	0.00675177
	DG(O-16:0/18:1(9Z))	17.0446	0.00262052	0.00678099
	C25 H Cl3 O12 S2	13.8163	0.00263597	0.00680226
	2-Hexaprenylphenol Esi+ 4.3009996	14.918	0.00263789	0.00680226
	Zopiclone	17.1228	0.00263847	0.00680226
	MK826 Esi+ 7.105	13.0562	0.00265187	0.0068284
	C25 H47 N O4 Esi+ 2.981001	15.6566	0.0026638	0.00685069
	limit Esi+ 7.0980024	17.127	0.00267066	0.00685994
	Anopterine	16.9193	0.00268472	0.006882
	limit Esi+ 7.101 :24	15.608	0.00268582	0.006882
	C8 H19 N7	17.9823	0.00273861	0.0070087
	C18 H30 Cl3 N4 O6 S3	14.0682	0.00276549	0.00706886
	C23 H27 N13 O12 S2	14.6273	0.00281974	0.00719876
	C17 H19 N9 O5	16.6886	0.00285658	0.00728392
	C39 H62 O2	18.0297	0.00290042	0.00738674
	DG(14:0/14:0/0:0)	20.0129	0.0029396	0.00747744
	DG(14:1(9Z)/16:0/0:0) Esi+ 4.7810016	14.0749	0.0029581	0.00751538
	C33 H10 N9 O	15.8093	0.00301833	0.00765911
	2,7-Anhydro-alpha-N-acetylneuraminic acid	16.4517	0.00305962	0.00775448
	Flavin adenine dinucleotide (FAD)	16.6846	0.00306486	0.00775839
	C39 H79 N9 O5	15.128	0.00307068	0.00776376
	Borrelidin	15.236	0.00310874	0.00784752
	p-Coumaroyl-CoA	13.271	0.00311494	0.00784752
	Tetraneurin A	13.7797	0.00311505	0.00784752
	limit Esi+ 7.1040025 :102	13.7001	0.00312631	0.00786645
	limit Esi+ 7.283	13.8692	0.00314732	0.00790981
	Anthemis glycoside B	17.8072	0.00326741	0.0082018
	Demethylphylloquinone	15.8688	0.00334393	0.00838382
	3-Hydroxy-3-(3-hydroxy-4-methoxyphenyl)propionyl-CoA	14.0838	0.0033594	0.00841255
	limit Esi+ 7.0919995 :34	16.0612	0.00337205	0.00842554
	DG(20:4(8Z,11Z,14Z,17Z)/16:1(9Z)/0:0)	16.0823	0.00337263	0.00842554
	limit Esi+ 7.2940035 :141	14.2037	0.0033817	0.00843365
	C34 H51 N6 O4	12.973	0.00338392	0.00843365
	MID73251:6-[2,3-Dihydroxy-1-(hydroxymethyl)propyl]-1,2-dihydro-7-hydroxy-9-methoxy-cyclopenta[c][1]b	16.4464	0.00339166	0.00843491
	C26 H20 N17 O10 Esi+ 7.3200045	14.7442	0.00339248	0.00843491
	CI Basic red 9	17.4963	0.0033996	0.00844241
	limit Esi+ 1.2529994 :95	14.1871	0.00340355	0.00844241
	C27 H52 N4 O2	16.477	0.00341093	0.00845071
	(+)-Prosopinine	15.8708	0.00345478	0.00854926
	Decabromodiphenyl oxide	13.6167	0.00347614	0.00859197
	C19 H33 N14 O4 Esi+ 5.4100027	15.9414	0.00355331	0.00876801
	limit Esi+ 7.3220005 :85	14.6776	0.00355573	0.00876801
	DG(15:0/20:2(11Z,14Z)/0:0)	16.7235	0.0035649	0.0087803
	C30 H56 N5 O3	15.7809	0.00357446	0.00879172
	PE(18:2(9Z,12Z)/15:0)	16.9047	0.00357793	0.00879172
	3-Oxopimelyl-CoA	13.6804	0.00383213	0.00940532
	Propionyl-CoA	14.2483	0.00391101	0.00958097
	2S-amino-pentanoic acid Esi+ 6.617998	13.952	0.00391284	0.00958097
	C44 H59 O4 Esi+ 1.6479999	14.3023	0.00392029	0.00958801
	Hydramethylnon	13.3529	0.00392608	0.00959098
	TG(18:0/14:0/18:2(9Z,12Z))[iso6]	15.5104	0.003953	0.00964549
	limit Esi+ 7.3009977	13.9874	0.00398251	0.00970622
	PE(20:3(5Z,8Z,11Z)/14:0)	21.3124	0.00399512	0.00972562
	limit Esi+ 7.291996 :161	14.296	0.00407968	0.00991706
	limit Esi+ 2.0960004	17.8738	0.00408322	0.00991706
	Ropinirole Esi+ 5.3159986	15.2623	0.00411273	0.00997717
	limit Esi+ 7.1040025	14.8232	0.0041219	0.00998787
	LysoPE(0:0/20:0)	17.7824	0.00412989	0.00999567
	limit Esi+ 7.2839975	15.8408	0.00416441	0.0100676
	limit Esi+ 7.095998 :126	13.6163	0.00420208	0.010147
	C19 H44 Cl3 N6 O17 S	13.4605	0.00436527	0.0105289
	limit Esi+ 7.2980013 :103	13.6381	0.00439871	0.0105973
	Glenvastatin	14.5268	0.00443695	0.0106772
	3,6-Anhydrogalactose Esi+ 6.6260033	17.4302	0.00449336	0.0108006
	limit Esi+ 1.271	15.9904	0.00451095	0.0108304
	2-Methylbutyrylglycine	16.6645	0.00452809	0.0108591
	Arachidonoyl dopamine Esi+ 1.3190001	15.3443	0.00458562	0.0109845
	limit Esi+ 6.796001	13.8234	0.0046018	0.0110107
	Beta-Alanyl-CoA	15.2146	0.00474548	0.0113415
	limit Esi+ 7.2940035	15.8839	0.00475912	0.0113612
	none Esi+ 7.095998 :117	13.813	0.00482167	0.0114974
	C24 H28 N2 O23	15.5836	0.00495922	0.011812
	C7 H17 N7	15.8727	0.00507357	0.0120706
	PI(16:2(9Z,12Z)/16:0)	16.6114	0.00509182	0.0120881
	C20 H36 O4	15.9866	0.00509247	0.0120881
	Thiophene-2-carbonyl-CoA Esi+ 7.1060004	14.4887	0.0051063	0.0121073
	none Esi+ 7.313998	13.9605	0.00513683	0.0121659
	PE(24:1(15Z)/20:4(8Z,11Z,14Z,17Z))	12.925	0.00519046	0.012279
	C23 H24 N14 O11 S	16.4649	0.00533572	0.0126084
	C36 H78 N11 O S	14.7313	0.00538462	0.0127096
	limit Esi+ 6.802001	14.3557	0.00539439	0.0127184
	C11 H10 N7 O2 S	18.0796	0.00545604	0.0128493
	C35 H56 N11	15.0033	0.00547412	0.0128649
	Lactosylceramide (d18:1/12:0)	15.0487	0.00547495	0.0128649
	none Esi+ 7.311002 :137	13.0636	0.00553962	0.0130023
	2-Oxo-4-methylthiobutanoic acid	21.1951	0.00555847	0.0130319
	5-Nitro-ortho-anisidine Esi+ 7.7940035	14.3374	0.0056248	0.0131727
	D-Asparagine	17.5862	0.00570106	0.0133364
	C37 H57 N10 O2	14.8105	0.00572416	0.0133727
	DU 122290	20.0397	0.00572933	0.0133727
	limit Esi+ 7.333004 :122	14.5306	0.00578301	0.013483
	3,6-Anhydrogalactose Esi+ 8.341002	17.1068	0.00580075	0.0135093
	limit Esi+ 7.102001	13.7001	0.00583889	0.013583
	C14 H19 N3 O11 S	16.2797	0.00593176	0.0137838
	MG(0:0/16:1(9Z)/0:0)	16.7119	0.00599999	0.0139246
	limit Esi+ 1.2560004 :92	13.9661	0.00600567	0.0139246
	C21 H35 N O8	21.0678	0.0061511	0.0142461
	none Esi+ 7.093998	13.4593	0.00617019	0.0142745
	C35 H14 N5 O7 Esi+ 7.2799997	14.7051	0.00619366	0.014313
	Maltohexaose Esi+ 8.338998	16.2181	0.00621609	0.014349
	Isoflavone 7-O-beta-D-glucoside	20.2462	0.00627232	0.0144629
	PE(20:0/24:0)	14.0681	0.00630104	0.0145132
	none Esi+ 7.2940035 :112	13.7191	0.0063314	0.0145582
	?,?'-Trehalose 6-phosphate	14.2268	0.00633449	0.0145582
	Tetraneurin A Esi+ 7.7850027	13.8773	0.00639166	0.0146735
	Galactomannan	20.73	0.00644931	0.0147897
	Pancracine	12.9525	0.0065261	0.0149494
	limit Esi+ 1.264	16.3953	0.00653986	0.0149646
	limit Esi+ 7.3000007 :109	14.096	0.00659167	0.0150667
	PE(15:0/16:0)	16.9288	0.00662215	0.0151198
	C37 H45 N6	14.1266	0.00670464	0.0152894
	C20 H39 N4 O2 Esi+ 1.2879993 :8	19.6839	0.00671097	0.0152894
	zeleplon	13.4869	0.00676029	0.015385
	C26 H50 N2 O11 S	16.6207	0.00678234	0.0154184
	none Esi+ 7.3299994	14.6716	0.00680279	0.0154482
	C22 H16 N2	15.374	0.00685883	0.0155586
	TG(18:1(11Z)/16:0/18:2(9Z,12Z))[iso3]	13.2389	0.00687761	0.0155843
	dTDP-4-amino-2,3,4,6-tetradeoxy-D-glucose	16.8036	0.00691019	0.0156412
	C22 H19 N13 O14	13.7144	0.00692569	0.0156564
	PE(18:0/14:1(9Z)) Esi+ 1.6469998	19.3365	0.00693185	0.0156564
	none Esi+ 7.328002	14.302	0.00712006	0.0160642
	C7 H6 N O5	15.1587	0.00715203	0.016119
	PE(24:0/14:1(9Z))	13.9612	0.00718968	0.0161864
	Luteolin 7-O-[?-D-glucuronosyl-(1-2)-?-D-glucuronide]	14.3226	0.00721042	0.0162157
	Eupacunoxin	17.7731	0.00724115	0.0162674
	C28 H37 N17	15.0665	0.00725327	0.0162771
	LysoPE(0:0/18:3(9Z,12Z,15Z))	18.0142	0.00729335	0.0163496
	limit Esi+ 7.093998	15.2119	0.0073995	0.0165698
	Taurolithocholic acid 3-sulfate	12.9246	0.00751788	0.0168169
	D-Urobilinogen Esi+ 5.5399976	16.2895	0.00762194	0.0170315
	C46 H64 O	15.3724	0.00777558	0.0173563
	C23 H24 N3 O18	16.4857	0.00788071	0.0175723
	C42 H80 N8	14.8158	0.00815915	0.0181738
	Coenzyme Q9	14.5177	0.00817882	0.0181983
	C34 H14 N3 O	14.9437	0.00820019	0.0182265
	Cromolyn Esi+ 7.2539988	17.0571	0.00826977	0.0183617
	limit Esi+ 7.2330008	13.6732	0.00833477	0.0184864
	limit Esi+ 7.0209975	13.2561	0.00847874	0.0187859
	Galactomannan Esi+ 8.339997	20.3032	0.00849602	0.0188043
	Fortimicin AO Esi+ 7.622998	15.6359	0.00856908	0.018946
	C34 H61 N3 O2	16.2958	0.00862034	0.0190392
	Dextrorphan	15.5144	0.00863677	0.0190555
	limit Esi+ 6.078002	16.1779	0.00867027	0.0191092
	C20 H28 N	14.9702	0.00872717	0.0192145
	Ethalfluralin	15.3586	0.008756	0.0192577
	none Esi+ 6.813998	16.5975	0.00881077	0.0193578
	C32 H52 N15 O	22.323	0.00889817	0.0195124
	limit Esi+ 1.2379999	17.0123	0.00889976	0.0195124
	Sulfometuron	15.866	0.00903963	0.0197984
	C33 H67 N4 O4	19.5552	0.00906812	0.0198401
	C21 H26 N6 O15 Esi+ 8.329001	17.2693	0.00909656	0.0198621
	none Esi+ 7.3289995	14.2791	0.00909964	0.0198621
	C14 H21 N4	15.52	0.00910664	0.0198621
	C18 H22 N4 O13 S	16.4047	0.00918834	0.0200195
	Phenkapton	16.9901	0.00926594	0.0201676
	C3 H14 N5 O	16.6631	0.0092798	0.0201768
	PE(22:2(13Z,16Z)/22:1(13Z))	15.8738	0.00932952	0.0202639
	limit Esi+ 7.101 :51	15.0147	0.00936227	0.020314
	Picosulfate	13.8414	0.00944654	0.0204757
	Aminopentol	16.3516	0.00948346	0.0205217
	Integerressine Esi+ 5.13575	15.8676	0.00948739	0.0205217
	C9 H2 N2 O S Esi+ 7.3940005	19.0477	0.00952654	0.0205852
	Lilaline	14.2145	0.00957117	0.0206603
	C31 H44 N O2	14.6835	0.00964702	0.0208026
	none Esi+ 7.0919995	14.9706	0.00966143	0.0208123
	Euparotin acetate Esi+ 1.5709995	16.5607	0.00970778	0.0208907
	PE(18:2(9Z,12Z)/16:0) Esi+ 1.264	15.775	0.00972172	0.0208992
	limit Esi+ 7.3450003	13.8108	0.00990597	0.0212688
	C15 N O16 S2	15.3456	0.00991393	0.0212688
	Cellopentaose Esi+ 8.341002	14.9386	0.0101304	0.021711
	C19 O20 S2	15.63	0.0101783	0.0217913
	Clotrimazole Esi+ 4.9479985	14.5781	0.0103202	0.0220725
	Dubamine	13.5712	0.0103609	0.0221371
	PE(20:1(11Z)/15:0) Esi+ 2.169999	21.7772	0.0105925	0.0226088
	Dihydrozeatin Esi+ 6.5299997	23.8162	0.0106499	0.0227083
	Siroheme	14.0623	0.0107853	0.022956
	limit Esi+ 3.6029983	18.6942	0.010788	0.022956
	C21 H51 Cl N9	16.5805	0.0108341	0.0230308
	C47 H8 N10 O	14.4332	0.0109576	0.0232696
	limit Esi+ 1.2599994	15.813	0.0110156	0.0233692
	Kuwanone H	15.5934	0.0110527	0.0234242
	Acrinathrin	17.3271	0.011085	0.0234688
	Piperaduncin B	14.5224	0.0111549	0.023593
	limit Esi+ 1.8460004	14.9995	0.0111935	0.0236508
	Dihydrozeatin	23.8087	0.0113885	0.0240386
	C23 H49 N5 S	16.2854	0.0117355	0.024746
	Fagomine Esi+ 6.106002	14.3096	0.0118283	0.0249167
	D-Fuconate	19.662	0.0120362	0.0253292
	limit Esi+ 1.5559999	14.3087	0.0120586	0.025351
	Leiocarposide	13.6329	0.0121197	0.0254538
	MK826 Esi+ 7.1049995	13.3703	0.0121909	0.0255778
	C8 H20 N7 O2 Esi+ 6.227002	17.7005	0.0122865	0.0257525
	D-Urobilin Esi+ 5.4550014 :27	16.8163	0.0123204	0.0257978
	limit Esi+ 7.279002	13.7175	0.0124205	0.0259814
	limit Esi+ 1.3590003	16.3179	0.0124696	0.026058
	2-(4-Ethoxyphenyl)-5,6,7,8-tetramethoxy-4H-1-benzopyran-4-one	16.4344	0.0126297	0.0263663
	TG(16:1(9Z)/18:0/18:1(11Z))[iso6]	16.0311	0.0126655	0.026409
	2-Hexaprenylphenol Esi+ 4.3439994	15.0722	0.0126753	0.026409
	2-(4-Ethoxyphenyl)-5,6,7,8-tetramethoxy-4H-1-benzopyran-4-one Esi+ 8.407998	16.4129	0.0127295	0.0264956
	Equilin sulfate	18.6559	0.0128689	0.0267591
	limit Esi+ 7.2049994	13.358	0.0128837	0.0267634
	limit Esi+ 1.2589998	13.4139	0.0129433	0.0268607
	limit Esi+ 7.9620028	14.3371	0.0133875	0.0277548
	5-Hydroxypentanoyl-CoA	15.0158	0.0135441	0.0280517
	Spiramycin 1 Esi+ 7.1759977	14.2864	0.0136011	0.028142
	C16 H37 N10 O	17.5426	0.0136167	0.0281466
	N-Glycoloylganglioside GM2	17.1395	0.0137107	0.0283129
	FAPy-adenine Esi+ 7.541995	16.538	0.0137545	0.0283724
	C28 H37 N17 Esi+ 3.514001	14.5707	0.0137719	0.0283724
	C37 H62 N11	18.0335	0.0137801	0.0283724
	C38 H77 N9	14.1756	0.0138943	0.0285795
	limit Esi+ 7.102998	15.4811	0.0140523	0.0288761
	C38 H82 N9 O	12.9049	0.0142177	0.0291874
	4-Guanidinobutanamide Esi+ 5.8829985	17.8893	0.0142871	0.0293011
	N-Acetyl-D-glucosamine	15.0519	0.0144913	0.0296908
	limit Esi+ 7.276	14.2305	0.0146302	0.0299461
	O-Acetylcypholophine	14.7275	0.0146872	0.0300336
	C52 H87	13.7216	0.0147165	0.0300642
	C24 H23 N8 O13 S	20.317	0.014757	0.0301175
	Euparotin acetate	16.5715	0.0149464	0.0304744
	3-hydroxy-sebacic acid	16.2488	0.0151694	0.0308989
	C31 H16 N12 O6	12.5138	0.0153508	0.0312382
	2-(4-Ethoxyphenyl)-5,6,7,8-tetramethoxy-4H-1-benzopyran-4-one Esi+ 8.407998 :111	16.4646	0.0154181	0.0313446
	C19 H50 N10 O4	16.1766	0.0155363	0.0315544
	limit Esi+ 1.2179996	15.205	0.0156376	0.0317294
	limit Esi+ 7.289998 :56	14.6382	0.0157078	0.0318409
	C17 H12 N12 O8	13.7246	0.0157813	0.0319591
	Brevetoxin B	13.8891	0.0158028	0.0319716
	13S-HODE-(d4)	15.1421	0.0158233	0.0319824
	1,2-Dioctadecanoyl-3-(galactosyl-B-1-6-galactosyl-B-1)-glycerol	13.1367	0.0159389	0.0321848
	Leukotriene E3	15.6503	0.0161461	0.0325596
	limit Esi+ 1.7630002 :13	17.2446	0.0161636	0.0325596
	limit Esi+ 7.082 :7	18.0713	0.016171	0.0325596
	C36 H47 N2 O3	14.3174	0.0162082	0.0326031
	C21 H26 N6 O15	17.2908	0.0163326	0.0328217
	C22 H8 O16	15.1393	0.0165356	0.033198
	2-Hexaprenylphenol	15.009	0.0166756	0.033447
	Guanosine diphosphate adenosine Esi+ 7.9620028	12.6067	0.0167252	0.0335144
	limit Esi+ 7.0090017 :150	13.3046	0.0168252	0.0336796
	limit Esi+ 6.946001	14.7491	0.0168398	0.0336796
	Sulfadoxine	19.6513	0.0168664	0.0337006
	C23 H40 N2 O2	17.7474	0.0169042	0.0337215
	limit Esi+ 1.2389995	14.7953	0.016909	0.0337215
	Isopentenyladenosine-5'-diphosphate	15.4401	0.0169856	0.033842
	C23 H47 N5 O2	17.5462	0.0170606	0.0339591
	PE(15:0/14:0) Esi+ 1.6469998	15.6479	0.0171301	0.0340652
	C35 H63 N7 O Esi+ 1.2270002	17.0138	0.017227	0.0342145
	limit Esi+ 7.291996 :119	14.2474	0.0172624	0.0342145
	C10 H21 N5 O3	14.922	0.0172654	0.0342145
	C29 H54 N5 S	14.7363	0.0172784	0.0342145
	limit Esi+ 7.0669994 :107	14.8134	0.0172868	0.0342145
	limit Esi+ 7.101 :128	13.4562	0.0174252	0.0344332
	limit Esi+ 7.328002 :173	13.2015	0.0174302	0.0344332
	Tetraneurin A Esi+ 6.483998	13.0896	0.017471	0.0344814
	4-Hydroxybutyryl-CoA	13.0724	0.0174962	0.0344987
	C37 H13 N10 O3	14.819	0.01753	0.0345327
	C29 H15 N12 O9	14.1561	0.0175529	0.0345454
	limit Esi+ 7.3289995 :105	13.9151	0.0176359	0.0346763
	limit Esi+ 7.2109995	15.3992	0.0177181	0.0348053
	C43 H79 N2 O3	15.0816	0.01775	0.0348352
	C21 H15 N11 O6 S	15.499	0.0178049	0.0349103
	Xanthurenic acid	19.7527	0.0178224	0.034912
	C37 H15 N15 O4	14.575	0.0178748	0.0349819
	limit Esi+ 7.1009994	14.1656	0.0181572	0.0355014
	C42 H80 N8 Esi+ 7.3049955	14.1983	0.0183472	0.0358394
	Azidopine Esi+ 7.0980024	13.4162	0.018417	0.0359423
	C21 H47 N10 O2	14.9914	0.0185312	0.0361314
	C11 N2 O12 S2	15.3023	0.0186546	0.0363383
	trans-4-Hydroxycyclohexanecarboxylate	14.8223	0.0186936	0.0363722
	PA(18:1(11Z)/18:1(9Z))	14.2342	0.0187067	0.0363722
	C6 H16 N3 O2	16.8853	0.0190602	0.0370252
	limit Esi+ 7.0969987	12.5376	0.0191726	0.0371818
	C36 H60 S	16.5701	0.0191771	0.0371818
	C45 H43 N2	15.0924	0.0191941	0.0371818
	C29 H56 O5	20.1143	0.0195826	0.0378994
	limit Esi+ 7.0980024 :26	15.7682	0.0196299	0.0379559
	Brassinolide	14.4373	0.0199283	0.0384975
	C20 H36 O22 S3	14.5283	0.0199866	0.0385745
	C30 H58 N2 O4	16.7193	0.0201236	0.0387739
	D-Urobilin Esi+ 4.923997	17.4876	0.0201333	0.0387739
	limit Esi+ 7.0330005	13.7804	0.0201454	0.0387739
	N-Acetyl-D-glucosaminate	15.8829	0.0203477	0.0391273
	Dihydrozeatin Esi+ 6.6280017	16.6752	0.0203815	0.0391564
	Diglycolic acid	16.1922	0.0205824	0.0395061
	lithocholic acid sulfate	15.0401	0.0207342	0.0397612
	Flubendiamide	14.8222	0.0208036	0.0398438
	limit Esi+ 7.101 :31	15.8429	0.0208153	0.0398438
	limit Esi+ 7.334002 :110	14.2481	0.0209032	0.0399754
	C32 H66 N5 O	16.9517	0.0209804	0.0400865
	C15 H4 N5 O12 Esi+ 6.953999	14.8529	0.0210194	0.04009
	Cymarin Esi+ 4.925002	17.0005	0.0210205	0.04009
	C27 H14 N8 O17	14.9023	0.021076	0.0401593
	limit Esi+ 7.101	16.1208	0.0211418	0.0402482
	limit Esi+ 7.188998	13.1428	0.0213614	0.0406293
	L-Galactose Esi+ 4.903	19.5084	0.0214298	0.0407224
	5-Ureido-4-imidazole carboxylate	17.4794	0.0217406	0.041256
	C37 H13 N4 O13	15.3298	0.02175	0.041256
	L-Galactose Esi+ 4.903 :17	19.5101	0.0218583	0.041424
	limit Esi+ 7.0090017 :149	13.7052	0.021941	0.0415431
	PE(15:0/14:0)	15.6265	0.0220351	0.0416837
	Staphyloxanthin Esi+ 7.1040025	14.1338	0.0225732	0.0426631
	4-Methylthiobutylthiohydroximate	18.5884	0.0226516	0.0427728
	3'-Keto-3'-deoxy-AMP	14.6895	0.023052	0.0434896
	Kaempferol 3-O-[6-(4-coumaroyl)-beta-D-glucosyl-(1-2)-beta-D-glucosyl-(1-2)-beta-D-glucoside]	14.4934	0.0234917	0.0442794
	C25 H54 N12	12.3032	0.0235579	0.0443643
	limit Esi+ 7.2839975 :91	14.33	0.0237281	0.0446445
	limit Esi+ 1.382	14.2996	0.023811	0.0447604
	PE(22:4(7Z,10Z,13Z,16Z)/P-18:0)	15.4571	0.0238866	0.0448622
	PE(20:2(11Z,14Z)/16:1(9Z))	15.6984	0.0241996	0.0454095
	dTDP-L-megosamine	14.4072	0.0242405	0.0454456
	Glyceryl phosphate	16.9548	0.0243024	0.0455209
	2S-amino-pentanoic acid	18.9688	0.0244472	0.0457513
	limit Esi+ 1.41	14.9161	0.0246368	0.0460649
	limit Esi+ 1.8539995	14.5112	0.0250969	0.0468833
	limit Esi+ 7.316999	14.007	0.0253095	0.0472385
	3,5-Dihydroxyphenylacetyl-CoA	12.47	0.0254434	0.0474461
	Rosmarinine	15.7658	0.025563	0.0476267
	limit Esi+ 7.3039985	14.955	0.0261177	0.0486169
	4-Guanidinobutanamide	17.8992	0.0265851	0.0494432
	L-Galactose	19.5032	0.0267339	0.0496758
	Megalomicin B	14.1201	0.0268734	0.0498908
	12-O-Palmitoyl-16-hydroxyphorbol 13-acetate	14.4077	0.0269157	0.0499251
	limit Esi+ 6.785002	15.1503	0.0269414	0.0499286
	C22 H33 N O	15.8208	0.0270713	0.050125
	C43 H64 O	17.4832	0.0271417	0.0502109
	Bis-?-glutamylcystine	15.9258	0.0278662	0.0515058
	Lipoyl-AMP	14.906	0.0280636	0.0518249
	limit Esi+ 5.1900015	14.3496	0.0281166	0.0518771
	Dithianon	17.639	0.028174	0.0519374
	limit Esi+ 7.061999 :77	14.4599	0.0286261	0.0527243
	PE(20:0/18:3(9Z,12Z,15Z)) Esi+ 6.238003	15.3541	0.0287597	0.0529018
	butoconazole Esi+ 6.9190025	17.3975	0.0287933	0.0529018
	Anopterine Esi+ 5.2960014	16.5777	0.0288146	0.0529018
	limit Esi+ 7.029002	13.5247	0.0288234	0.0529018
	Haloxyfop methyl Esi+ 7.095998	18.5699	0.0292458	0.0536301
	C28 H21 N16 O5 S3	14.4083	0.0294052	0.0538752
	Methylitaconate	15.3114	0.029524	0.0540457
	alpha,alpha'-Trehalose 6-mycolate	16.0099	0.0298762	0.0546427
	limit Esi+ 3.5059986 :52	16.6415	0.0299641	0.0547556
	C14 H22 N7 O10	16.334	0.0308992	0.056393
	limit Esi+ 1.2509997 :154	14.2161	0.0309196	0.056393
	C19 H44 N10 O	14.6894	0.0309408	0.056393
	limit Esi+ 7.309001 :45	15.4737	0.031089	0.0566139
	C26 H41 O3	15.3585	0.0311596	0.0566932
	C36 H49 N10	12.7793	0.0312418	0.0567935
	PE(18:1(11Z)/18:3(9Z,12Z,15Z)) Esi+ 16.817995	14.0754	0.0316368	0.0574319
	DG(14:0/20:4(5Z,8Z,11Z,14Z)/0:0)	16.2354	0.0316478	0.0574319
	C29 H57 N4 O4	16.8114	0.0319808	0.057986
	DG(14:0/14:0/0:0) Esi+ 1.4300002	15.4627	0.0320876	0.0581293
	Brevetoxin B Esi+ 6.7180004 :175	13.8182	0.0321605	0.058211
	Galactomannan Esi+ 8.458005	20.2661	0.0326923	0.0591226
	C30 H60 N17	14.5763	0.0330049	0.0596365
	limit Esi+ 7.095998 :59	15.3376	0.0331041	0.0597642
	C16 O16 S2	16.6809	0.0332345	0.0599479
	C32 H2 N O7	12.7422	0.0335216	0.0604138
	limit Esi+ 7.3309965 :135	14.211	0.0336004	0.0605038
	C21 H36 O26	14.3035	0.0337864	0.0607866
	limit Esi+ 1.4739993	13.5833	0.033879	0.0609008
	DG(15:0/20:2(11Z,14Z)/0:0) Esi+ 4.7239995	13.2831	0.0340068	0.0610781
	C34 H63 N16 O2	18.6607	0.0341773	0.0612813
	D-Urobilinogen Esi+ 5.153	16.6077	0.0341784	0.0612813
	dTDP-L-4-oxovancosamine	14.209	0.0342178	0.0612995
	none Esi+ 6.803999	14.8274	0.0343806	0.0615385
	C24 H43 N2 O	13.7027	0.0347732	0.0621882
	p-Nitrophenyl-O-ethyl ethylphosphonate Esi+ 7.096998	20.5992	0.0352629	0.0630103
	limit Esi+ 1.2869996	13.6326	0.0354087	0.0632169
	Dimethirimol	19.4806	0.0358696	0.0639853
	ADP-D-ribose Esi+ 7.9620028	14.2912	0.0366348	0.065248
	Buprenorphine	20.6138	0.0366397	0.065248
	limit Esi+ 1.2840003	14.1664	0.0367698	0.0654239
	C39 H84 N3 O5	14.4762	0.0368229	0.0654629
	limit Esi+ 1.2529994	16.597	0.0368781	0.0655055
	Cymoxanil	15.3297	0.0371671	0.0659629
	limit Esi+ 7.102001 :116	13.3259	0.037227	0.0659629
	PE(20:3(5Z,8Z,11Z)/24:1(15Z))	16.1344	0.03723	0.0659629
	C15 H27 N O2	17.3696	0.0374951	0.0663765
	limit Esi+ 1.2680005	13.2938	0.038433	0.067973
	TG(18:1(11Z)/18:0/18:1(11Z))[iso3]	15.1678	0.0384618	0.067973
	TG(10:0/10:0/10:0)	16.4175	0.0386002	0.06816
	MG(0:0/18:1(9Z)/0:0) Esi+ 1.2659998	14.5408	0.0388218	0.0684937
	Ethoprop	18.4342	0.038896	0.068567
	C13 H2 O4 S3	15.6191	0.0393404	0.0692921
	Diloxanide-O-Glucuronide	15.8406	0.0395107	0.0695335
	Saccharocin	14.6698	0.0399927	0.0702684
	1,4-beta-D-Glucan Esi+ 5.214001	15.7871	0.0399953	0.0702684
	none Esi+ 7.311002	12.8609	0.0404428	0.070995
	C14 H29 N3 O3	16.1017	0.0405362	0.0710995
	albendazole	14.509	0.0406348	0.0712129
	PE(24:0/20:3(5Z,8Z,11Z))	15.1285	0.0411179	0.0719993
	none Esi+ 7.101 :120	13.385	0.0415656	0.0727225
	C16 H2 N O14 S2	13.9174	0.0416374	0.0727873
	PE(20:3(8Z,11Z,14Z)/20:3(8Z,11Z,14Z))	14.999	0.0419237	0.0732268
	2-Oxoarginine	23.3354	0.0422554	0.0737447
	Mevinphos Esi+ 6.647002	18.4464	0.0423218	0.073799
	limit Esi+ 1.2550001	16.4661	0.0426435	0.0742983
	C47 H2 N O6	13.2691	0.0429441	0.0747599
	C44 H59 O4	14.2706	0.0431865	0.0751195
	limit Esi+ 1.2910002	15.0907	0.0435546	0.0756969
	C20 H39 N4 O2 Esi+ 1.2879993	19.5576	0.0439587	0.0763359
	C22 H16 N O24	19.6899	0.0442745	0.0768206
AveExpr: average log2-abundance for the metabolite over all samples.
P.value: raw p-value
FDR:Benjamini and Hochberg's method to control false discovery rate

## Sheet: Panel B
Ionization Mode	Metabolite	AveExpr	P.value	FDR
Negative	C10 H16 N O2	14.2863	2.48097e-16	2.27257e-13
	Docosanoic acid	16.6405	2.52778e-14	1.15772e-11
	C25 H52 N22 O2	17.2528	1.38327e-13	4.22358e-11
	16-Oxo-palmitate	13.6341	6.25316e-13	1.43197e-10
	PE(18:1(11Z)/15:0)	15.7078	2.46937e-12	4.52388e-10
	LysoPE(0:0/14:0)	15.1749	1.72463e-11	2.29886e-09
	LysoPE(0:0/14:0) Esi- 4.8890023	15.4356	1.75677e-11	2.29886e-09
	DG(20:5(5Z,8Z,11Z,14Z,17Z)/15:0/0:0)	14.7735	2.69281e-11	3.08326e-09
	LysoPE(0:0/14:0) Esi- 1.6109998	15.2786	1.46826e-10	1.47777e-08
	PE(18:0/18:0)	13.6748	1.61328e-10	1.47777e-08
	LysoPE(0:0/18:0)	15.4199	2.99649e-10	2.49526e-08
	Flutriafol	15.0139	3.37401e-10	2.5755e-08
	PE(14:1(9Z)/16:0) Esi- 1.6030003 :25	14.125	4.73855e-10	3.33886e-08
	PA(16:0/16:0)	16.9298	1.03502e-09	6.77201e-08
	PE(14:1(9Z)/16:0) Esi- 1.6030003	14.1729	1.14769e-08	7.00857e-07
	C7 H17 N4 O4	14.3891	3.03965e-08	1.7402e-06
	L-beta-aspartyl-L-glutamic acid	20.9291	3.3353e-08	1.79714e-06
	PE(14:1(9Z)/16:0)	14.4806	3.83946e-08	1.95386e-06
	PE(20:1(11Z)/20:3(5Z,8Z,11Z))	16.8885	5.72826e-08	2.76163e-06
	7-Methylxanthine Esi- 6.9859962	16.4112	8.1388e-08	3.70458e-06
	Cellotetraose Esi- 8.834999	17.3524	8.49304e-08	3.70458e-06
	Cellotetraose	17.4045	9.05376e-08	3.76966e-06
	Theobromine	15.5788	1.03978e-07	4.14102e-06
	Purine Esi- 8.385997	15.1088	1.32049e-07	5.03989e-06
	L-beta-aspartyl-L-glutamic acid Esi- 3.8150012	17.2542	1.54508e-07	5.66117e-06
	PI(16:2(9Z,12Z)/16:0)	15.0335	3.36504e-07	1.18553e-05
	PM-toxin B	13.8927	4.76737e-07	1.61737e-05
	C18 H24 N6 O14	14.6114	6.06564e-07	1.98433e-05
	DG(15:0/22:5(4Z,7Z,10Z,13Z,16Z)/0:0)	14.9772	8.28045e-07	2.61548e-05
	Amarogentin Esi- 8.388	17.0777	9.73967e-07	2.82433e-05
	Amarogentin	17.0777	9.73967e-07	2.82433e-05
	S-(p-Azidophenacyl)glutathione	14.5721	1.00792e-06	2.82433e-05
	1-Methylinosine Esi- 8.389005	15.6921	1.0175e-06	2.82433e-05
	PE(20:2(11Z,14Z)/15:0)	17.7305	1.13621e-06	2.94546e-05
	N-Methyl-2,3,7,8-tetramethoxy-5,6-dihydrobenzophenathridine-6-ethanoic acid	15.7017	1.18976e-06	2.94546e-05
	N-Methyl-2,3,7,8-tetramethoxy-5,6-dihydrobenzophenathridine-6-ethanoic acid Esi- 3.7960002 :16	15.7017	1.18976e-06	2.94546e-05
	N-Methyl-2,3,7,8-tetramethoxy-5,6-dihydrobenzophenathridine-6-ethanoic acid Esi- 3.7960002	15.7017	1.18976e-06	2.94546e-05
	N-Methyl-2,3,7,8-tetramethoxy-5,6-dihydrobenzophenathridine-6-ethanoic acid Esi- 3.7940006	16.0349	1.2826e-06	3.09175e-05
	PE(22:2(13Z,16Z)/14:0) Esi- 1.5979998	18.0692	2.15918e-06	5.0713e-05
	4-Pyridoxic acid	13.7022	3.06974e-06	7.02971e-05
	2,2-Bis(4-hydroxyphenyl)hexafluoropropane	14.9771	3.36468e-06	7.51719e-05
	1-Palmitoyl Lysophosphatidic Acid	13.6821	3.79893e-06	8.28528e-05
	Galactomannan	17.6581	4.06432e-06	8.49278e-05
	Galactomannan Esi- 8.386996	17.6581	4.0795e-06	8.49278e-05
	PG(16:1(9Z)/16:1(9Z))	20.0763	8.46865e-06	0.000170785
	PE(20:3(5Z,8Z,11Z)/20:1(11Z))	16.7746	8.72348e-06	0.000170785
	AMPA	19.2316	8.76298e-06	0.000170785
	GPSer(18:0/18:1(9Z))	17.6673	9.20464e-06	0.000175655
	Uric acid	17.7969	9.86995e-06	0.000184508
	LysoPE(0:0/18:0) Esi- 4.817001	13.2723	1.10288e-05	0.000202048
	C7 H7 N2 O4	15.8003	1.15656e-05	0.000207728
	Diclofop	13.6164	1.86798e-05	0.000329052
	9-Fluoroprednisolone	13.6172	2.18427e-05	0.000377508
	Diketospirilloxanthin/ 2,2'-Diketospirilloxanthin	15.9802	2.38774e-05	0.000405031
	PG(18:2(9Z,12Z)/18:3(6Z,9Z,12Z))	17.5167	3.27652e-05	0.000545689
	Dodecanoic acid, 3-hydroxy-, (S)-; L-3-Hydroxydodecanoic acid	16.3439	3.66701e-05	0.000595517
	C21 H32 N5 O21	14.6483	3.70573e-05	0.000595517
	none	14.725	3.86943e-05	0.000611102
	Cassaidine	13.8056	4.13476e-05	0.000641939
	C28 H18 N16 O7	14.8622	4.78464e-05	0.000717636
	Tetracycline	17.2779	4.88598e-05	0.000717636
	Pyrido[3,4-c]psoralen	15.9487	4.92766e-05	0.000717636
	DG(18:2(9Z,12Z)/15:0/0:0)	15.7922	4.93571e-05	0.000717636
	trans-Zeatin	18.247	5.47956e-05	0.000784262
	7-Methylxanthine	16.5067	6.46192e-05	0.000897503
	PI(16:2(9Z,12Z)/16:0) Esi- 4.658001	14.2064	6.46673e-05	0.000897503
	AMPA Esi- 3.8220005	19.2122	7.9111e-05	0.00108158
	DG(20:1(11Z)/15:0/0:0)	14.4057	8.4322e-05	0.00113587
	C29 H46 N7 O2 S	14.9092	0.000106088	0.00140836
	C20 H30 N9 O17 Esi- 8.3930025	15.1929	0.000123584	0.00161719
	Lauric acid	20.1427	0.000175343	0.00226218
	DG(16:1(9Z)/15:0/0:0)	17.2371	0.000181798	0.00231287
	L-Glutamate	17.9333	0.000216456	0.00271608
	Chartreusin	14.5244	0.000235404	0.00291393
	all-trans-8'-Apo-beta-carotenal	14.2287	0.000260315	0.00317931
	C5 H9 N O2	19.359	0.000274328	0.00329817
	N-Acetyl-L-Histidine	13.6041	0.000277935	0.00329817
	CAI-1	16.277	0.000281364	0.00329817
	Debromohymenialdisine	14.7214	0.000284449	0.00329817
	Estriol 3-sulfate 16-glucuronide	15.8122	0.000298806	0.00342132
	C22 H35 N10 O4	14.7063	0.000322467	0.00364667
	PS(18:0/18:0)	17.144	0.000343884	0.00384144
	DG(18:2(9Z,12Z)/15:0/0:0) Esi- 1.4449998	13.2831	0.000350384	0.00386689
	C22 H48 N6	14.7154	0.000357195	0.00389512
	C32 H54 N4 O3	16.1695	0.000367279	0.00395797
	C28 H9 N7 O14	12.8158	0.000507983	0.00541061
	PE(18:3(9Z,12Z,15Z)/22:0) Esi- 2.2089999	17.3178	0.000543884	0.00572641
	Myristic acid	21.5635	0.000564822	0.00587928
	Diketospirilloxanthin/ 2,2'-Diketospirilloxanthin Esi- 1.3460004	15.938	0.000594366	0.0061173
	PE(14:1(9Z)/18:1(9Z)) Esi- 1.1910006	12.8941	0.000683659	0.00695813
	C27 H58 N6 O2	15.3771	0.000707296	0.00711959
	C34 H58 N4 O3	17.4105	0.000764558	0.00761234
	1-Octacosanol	13.3509	0.000792251	0.00780324
	Terpenoid EA-I Esi- 5.382999 :31	16.3762	0.000924282	0.00879686
	Terpenoid EA-I Esi- 5.382999 :17	16.3762	0.000924282	0.00879686
	Terpenoid EA-I Esi- 5.382999	16.3762	0.000927597	0.00879686
	Terpenoid EA-I Esi- 5.382999 :6	16.3762	0.000931545	0.00879686
	PI(16:1(9Z)/16:0) Esi- 1.6049999	14.7708	0.000953763	0.00891476
	beta-D-Sedoheptulopyranose Esi- 5.072002	16.218	0.000969537	0.00897067
	Bakankoside Esi- 4.686001	16.0405	0.000988928	0.00905858
	Lactoyl-CoA	14.3111	0.00101928	0.00924414
	12-Hydroxydodecanoic acid	14.8468	0.00106012	0.00951801
	Lignoceric acid	16.7043	0.00107026	0.00951801
	C20 H30 N9 O17	15.2829	0.0011211	0.00987432
	Nervonic acid	15.2841	0.0011776	0.0102732
	N-Methyl-D-aspartic acid	17.1886	0.00122897	0.0106202
	allopurinol	18.5136	0.00129216	0.0108644
	Pentadecylic acid	17.9566	0.00129362	0.0108644
	Gallotannin	14.6625	0.0012984	0.0108644
	Palmitic Acid methyl ester	17.8846	0.00132026	0.0108644
	Propapyriogenin A2 Esi- 5.320003 :19	15.8633	0.00132817	0.0108644
	Propapyriogenin A2 Esi- 5.320003	15.8632	0.00133073	0.0108644
	Kuwanone G	13.7499	0.00134026	0.0108644
	5-Fluorouridine monophosphate	13.9746	0.00135983	0.0109264
	12-Hydroxydodecanoic acid Esi- 1.5379992	14.9758	0.00141351	0.011259
	Propapyriogenin A2 Esi- 5.3209996	15.4976	0.00146489	0.0115676
	DG(14:1(9Z)/16:0/0:0) Esi- 1.2120006	13.658	0.00153255	0.0119984
	C14 H18 N2 O18	13.5084	0.00159274	0.012364
	1-Octacosanol Esi- 1.3250005	13.4479	0.00165701	0.0127548
	LysoPE(20:1(11Z)/0:0)	18.2232	0.00170149	0.012988
	MID66857:alpha-Galactosyl-(1-6)-alpha-galactosyl-(1-6)-alpha-galactosyl-(1-6)-alpha-galactosyl-(1-6)	15.7726	0.00184091	0.0139361
	CE(10:0)	15.3915	0.00190667	0.0143157
	Terpenoid EA-I	16.805	0.00198931	0.0147111
	Flavin adenine dinucleotide (FAD)	13.6081	0.00199146	0.0147111
	8-Hydroxypurine Esi- 7.7530003	17.8766	0.00218952	0.0160055
	2-aminomuconic acid semialdehyde	15.624	0.00220164	0.0160055
	limit Esi- 1.6109998 :12	14.8197	0.0022625	0.0163185
	Propapyriogenin A2	16.6367	0.00251176	0.0179748
	PA(16:0/16:0) Esi- 1.3059999	14.017	0.00257487	0.0182836
	limit Esi- 1.5940008	14.0217	0.00274459	0.0193388
	C22 H9	13.7797	0.00314783	0.0220108
	DG(15:0/20:3(8Z,11Z,14Z)/0:0)	13.2621	0.00326572	0.0226204
	C52 H63 N2	14.4962	0.0032844	0.0226204
	C22 H35 N10 O4 Esi- 4.7799993	14.6606	0.00333537	0.0228
	Hypoxanthine	17.4334	0.00354569	0.0240582
	PI(18:2(9Z,12Z)/18:1(9Z))	16.4745	0.00359706	0.0242272
	MID74682:Tetradecanoic acid, 3-hydroxy-, (R)-; Tetradecanoic acid, 3-hydroxy-, D-(-)-; (3R)-3-Hydrox	15.4607	0.00368294	0.0246246
	PE(24:0/14:1(9Z))	17.2596	0.00390315	0.0259079
	Flaviolin	14.9672	0.00399823	0.026348
	beta-D-Sedoheptulopyranose	16.2504	0.00403945	0.0264295
	Apholate	14.3729	0.00418103	0.0271619
	C5 H5 N2 S	22.3407	0.00469982	0.0303172
	XV638 Esi- 5.2319984	14.7414	0.00480403	0.0305012
	C19 H21 N4 O20	14.5002	0.00484895	0.0305012
	XV638 Esi- 5.2319984 :36	14.7401	0.00485643	0.0305012
	XV638	14.7428	0.00488817	0.0305012
	Ricinoleic acid	15.2614	0.00489485	0.0305012
	limit Esi- 1.2319995	12.4885	0.00508141	0.0313507
	PG(16:1(9Z)/18:2(9Z,12Z))	21.3756	0.00509963	0.0313507
	C34 H66 O4	18.9651	0.00518054	0.0316359
	C3 H6 N5 O3	14.6219	0.00552718	0.0333377
	Inosine Esi- 5.2400017	21.0024	0.00553202	0.0333377
	Inosine	21.0315	0.00571038	0.0341876
	C31 H60 O7	17.8146	0.00597798	0.0355574
	Maculosine	16.0682	0.00608057	0.0359342
	cis-4-Hydroxy-D-proline	14.7346	0.00612198	0.035947
	C36 H5 N6 O3	13.6353	0.00635007	0.0370488
	Mecarbinzid	15.5811	0.00648535	0.0375986
	Theophylline	18.9666	0.00659265	0.0379803
	1-Naphthalenesulfonic acid	14.3189	0.00667675	0.0382244
	P1,P4-Bis(5'-guanosyl) tetraphosphate (GppppG)	15.7017	0.00688069	0.0391473
	Theobromine Esi- 7.7539988	19.0454	0.00708666	0.0398315
	Gardenoside	16.8653	0.00711516	0.0398315
	C27 H56 N6 O2	14.2134	0.0071314	0.0398315
	Hypoxanthine Esi- 5.9960012	17.5258	0.00734244	0.0405787
	Fortimicin AP Esi- 1.0769998	13.218	0.00735378	0.0405787
	Purine Esi- 7.75	18.8185	0.00741805	0.0406882
	C31 H5 N O18	14.0212	0.00777556	0.0423953
	PE(20:2(11Z,14Z)/15:0) Esi- 2.7139988	16.3182	0.00807445	0.0437645
	C28 H52 N7 O	13.2615	0.00833784	0.0449262
	C35 H71 N8 O2	13.6913	0.00845541	0.0452933
	limit Esi- 1.5940008 :35	14.0113	0.00921398	0.0490698
	C21 H50 N13 S	15.7818	0.0093058	0.0492724
	C20 H12 N9 O10	14.7597	0.009535	0.0501957
	limit Esi- 4.7420006	13.7499	0.0100078	0.0523837
	6,8a-Seco-6,8a-deoxy-5-oxoavermectin ''1b'' aglycone	14.1633	0.0102548	0.0533716
	PE(18:1(11Z)/16:0)	16.8721	0.0105547	0.0544786
	C31 H58 N12 O	15.578	0.0106266	0.0544786
	TG(16:0/16:0/16:0)	12.5598	0.010657	0.0544786
	C22 H20 O28	15.2416	0.0107054	0.0544786
	6-Hydroxyl-1,6-dihydropurine ribonucleoside	15.8702	0.0107819	0.0545648
	1,4-beta-D-Glucan	17.7023	0.0116374	0.0584305
	Benz[a]acridine	14.3063	0.0116733	0.0584305
	Chlorfluazuron	14.8844	0.0117853	0.0586705
	5-Methyldeoxycytidine diphosphate	13.9727	0.0119509	0.059173
	PE(18:1(11Z)/14:0) Esi- 1.6039997	15.4187	0.0130319	0.0639686
	Maleic hydrazide	16.8518	0.0130659	0.0639686
	Ubiquinone 8 Esi- 1.2949992	14.5841	0.0131516	0.0639686
	Octadecanedioic acid	16.9515	0.0131988	0.0639686
	6-Hydroxyl-1,6-dihydropurine ribonucleoside Esi- 6.682003	15.854	0.0134652	0.064618
	PE(22:2(13Z,16Z)/14:0)	18.4352	0.0135216	0.064618
	C31 H62 N5 O3	14.9739	0.0135444	0.064618
	DG(16:1(9Z)/15:0/0:0) Esi- 1.4270009	15.1634	0.0138148	0.0655666
	LysoPE(0:0/22:2(13Z,16Z))	17.7162	0.0140687	0.0664118
	all-trans-phytofluene	14.7198	0.0141379	0.0664118
	PI(16:1(9Z)/16:0)	14.3991	0.0149401	0.069822
	Ubiquinone 8	14.5301	0.0150391	0.0699282
	C4 H3 N2 O3	17.8482	0.0152158	0.0703924
	DG(16:1(9Z)/15:0/0:0) Esi- 1.4290006	14.9611	0.0154726	0.071066
	C16 H21 N14 O8	15.7592	0.0155166	0.071066
	6,8a-Seco-6,8a-deoxy-5-oxoavermectin ''1b'' aglycone Esi- 5.3659983	13.576	0.0169285	0.0771468
	6-Acetyl-D-glucose	16.7193	0.0171346	0.0773655
	1-Methylinosine	18.8673	0.0171454	0.0773655
	Nirvanol	15.5335	0.0178213	0.0800211
	8S-hydroxy-9Z,12Z-octadecadienoic acid	19.5437	0.0179289	0.0801118
	3-hydroxy-5-methoxy-6-prenylstilbene-2-carboxylic acid	14.7003	0.0186842	0.0826818
	allopurinol Esi- 5.2460012 :5	16.9152	0.0187837	0.0826818
	Cefamandole	13.4117	0.0188462	0.0826818
	C26 H14 N5 O15	13.7083	0.0188652	0.0826818
	1-Hydroxy-2-aminoethylphosphonate Esi- 7.549999	14.565	0.0193096	0.0842268
	allopurinol Esi- 5.2460012	16.9091	0.0200925	0.0869004
	Deoxyadenosine	14.4165	0.0201123	0.0869004
	1-Hydroxy-2-aminoethylphosphonate	14.5605	0.0206215	0.0884305
	D-Glucuronic acid Esi- 7.0450006	17.4157	0.0206595	0.0884305
	4-Amino-2-hydroxylamino-6-nitrotoluene	15.7483	0.0215248	0.0912965
	Makisterone A Esi- 1.2970005	13.3483	0.0215748	0.0912965
	C25 H40 N4 O18	15.8219	0.0216281	0.0912965
	N-Formyl-L-glutamate Esi- 7.2530007	19.2448	0.0219824	0.0917102
	D-Glutamine	19.1645	0.022107	0.0917102
	N-Formyl-L-glutamate	19.2426	0.02214	0.0917102
	Kobusone	14.0305	0.0222186	0.0917102
	Oxydeprofos	15.1201	0.0222267	0.0917102
	C15 H13 N O6	23.5493	0.0224503	0.0920607
	2-Amino-3,7-dideoxy-D-threo-hept-6-ulosonic acid	21.9545	0.0225127	0.0920607
	limit Esi- 7.625	13.4159	0.0236986	0.0964795
	Pantetheine	15.6071	0.0241746	0.0979821
	C30 H42 N12 O	13.8047	0.0247215	0.0997572
Positive	3-Hydroxyisoheptanoic acid	14.4104	1.32276e-17	2.7725e-14
	L-Histidinol	16.8141	4.32063e-16	4.52802e-13
	Pirbuterol	14.0636	8.55011e-14	5.97367e-11
	limit Esi+ 1.2270002	16.654	1.39634e-13	7.3168e-11
	Dihydrozeatin Esi+ 6.6280017	16.6752	2.16327e-12	9.06845e-10
	Dihydrozeatin Esi+ 6.5299997	23.8162	4.19674e-12	1.46606e-09
	Dihydrozeatin	23.8087	5.22827e-12	1.56549e-09
	(+)-Luguine	15.5291	1.51202e-11	3.96149e-09
	PE(15:0/18:0)	19.0842	1.77646e-11	4.13719e-09
	PE(18:1(11Z)/15:0)	20.772	2.51406e-11	4.92291e-09
	Talatizamine	18.9918	2.58359e-11	4.92291e-09
	Mevinphos Esi+ 6.647002	18.4464	3.67621e-11	6.42111e-09
	C36 H65 N8	18.2284	4.50181e-11	7.01465e-09
	Mevinphos	18.4497	4.99027e-11	7.01465e-09
	Ethoprop	18.4342	5.02003e-11	7.01465e-09
	PE(16:0/15:0)	17.8529	7.39882e-11	9.69246e-09
	N-Acetyl-D-glucosamine	15.0519	8.55943e-11	1.02653e-08
	3-Fluoro-cis,cis-muconate	14.5004	8.81562e-11	1.02653e-08
	PE(15:0/18:1(9Z))	19.5273	1.22588e-10	1.35234e-08
	LysoPE(0:0/14:0)	18.1608	1.29302e-10	1.35509e-08
	N-(3-oxo-octanoyl)-homoserine lactone	15.2629	1.87067e-10	1.8671e-08
	C36 H70 O4	13.4833	2.22108e-10	2.11608e-08
	C30 H52 N20	15.6595	5.36197e-10	4.88639e-08
	C29 H65 N13 O	17.5775	1.15489e-09	9.99638e-08
	Picosulfate	13.8414	1.21257e-09	9.99638e-08
	C36 H63 N8	17.6047	1.24001e-09	9.99638e-08
	C35 H71 N3 S	16.8497	2.28928e-09	1.76686e-07
	PE(15:0/18:0) Esi+ 2.2229998	18.3955	2.37322e-09	1.76686e-07
	albendazole	14.509	2.4446e-09	1.76686e-07
	C23 H29 N9 O10	13.9256	2.87862e-09	2.0112e-07
	DG(14:0/16:0/0:0)	16.6717	3.46908e-09	2.34555e-07
	PE(15:0/16:0)	16.9288	3.69591e-09	2.42082e-07
	Usambarine	19.711	5.83522e-09	3.70625e-07
	1-methylhistidine Esi+ 8.447	19.3918	7.31103e-09	4.46248e-07
	C23 H49 N7 O2	13.3461	7.45166e-09	4.46248e-07
	C42 H74 O2 S2	14.8353	9.52774e-09	5.54726e-07
	Crinamidine	14.6264	1.26141e-08	7.14573e-07
	C25 H47 N O4	15.6773	2.06158e-08	1.13713e-06
	L-Methionine	17.6866	4.87438e-08	2.61967e-06
	DG(14:1(9Z)/16:0/0:0) Esi+ 1.4090003	16.5214	5.22344e-08	2.73708e-06
	DG(14:1(9Z)/18:1(9Z)/0:0)	19.1155	5.38059e-08	2.74284e-06
	C6 H16 N5 O3	14.1792	5.49614e-08	2.74284e-06
	C33 H65 N4 O4	19.286	6.85582e-08	3.34181e-06
	C33 H56 N15 O2	15.6744	1.32047e-07	6.29026e-06
	limit Esi+ 1.6329997	22.0593	1.80403e-07	8.40278e-06
	PE(22:1(13Z)/15:0)	22.5625	1.84734e-07	8.41744e-06
	C23 H45 N O4	15.0231	2.6384e-07	1.17661e-05
	C7 H15 N O3	20.8635	2.79726e-07	1.22147e-05
	C29 H37 N10 O	16.8005	3.22659e-07	1.38019e-05
	Buprenorphine Esi+ 4.597	20.5316	3.86101e-07	1.61853e-05
	Nandrolone phenpropionate	14.6656	4.1404e-07	1.70162e-05
	DG(14:1(9Z)/20:0/0:0)	20.0635	5.45507e-07	2.19881e-05
	L-Glutamate Esi+ 6.3099985	15.8165	6.52736e-07	2.58139e-05
	C5 H9 N2 O5	17.5005	6.8891e-07	2.67399e-05
	Cefroxadine	15.6135	9.64112e-07	3.67414e-05
	limit Esi+ 1.6320001	18.7004	1.00705e-06	3.76926e-05
	C12 H15 N9 O9	15.4062	1.06586e-06	3.91936e-05
	Cellotetraose	18.3546	1.38132e-06	4.84253e-05
	1-methylhistidine	19.2613	1.40644e-06	4.84253e-05
	C25 H47 N O4 Esi+ 2.981001	15.6566	1.4081e-06	4.84253e-05
	ADP-D-ribose	15.8808	1.40932e-06	4.84253e-05
	PE(16:1(9Z)/15:0)	17.0736	1.44412e-06	4.88205e-05
	C36 H65 N8 O	17.5497	1.586e-06	5.2766e-05
	Theophylline Esi+ 8.3429985	17.1714	1.67139e-06	5.4738e-05
	DG(14:1(9Z)/16:0/0:0) Esi+ 4.7810016	14.0749	1.70475e-06	5.49718e-05
	C27 H55 N4 O3	14.0656	1.73426e-06	5.50759e-05
	PE(20:2(11Z,14Z)/15:0)	23.0925	1.89127e-06	5.91657e-05
	C28 H56 N14	15.7953	2.13308e-06	6.57492e-05
	C21 H26 N6 O15 Esi+ 8.329001	17.2693	2.1718e-06	6.59725e-05
	Maltohexaose Esi+ 8.338998	16.2181	2.20615e-06	6.60584e-05
	C24 H19 N2 O11	14.8611	3.21362e-06	9.46774e-05
	6-Oxo-1,4,5,6-tetrahydronicotinate	16.601	3.25228e-06	9.46774e-05
	Rhododendrin	17.1196	3.53035e-06	0.000101242
	N(alpha)-t-Butoxycarbonyl-L-leucine	15.2103	3.59303e-06	0.000101242
	PE(15:0/14:0) Esi+ 2.3160012	14.3973	3.62269e-06	0.000101242
	Cellopentaose Esi+ 8.341002	14.9386	4.10686e-06	0.000113263
	C40 H71 N5 O3	15.856	4.36699e-06	0.000118873
	PE(15:0/20:1(11Z))	14.0771	4.44276e-06	0.000119385
	PE(15:0/14:0)	15.6265	4.56713e-06	0.000119995
	DG(22:6(4Z,7Z,10Z,13Z,16Z,19Z)/15:0/0:0)	15.0686	4.57994e-06	0.000119995
	N2-Acetyl-L-ornithine	15.7481	5.1679e-06	0.000133639
	Streptozocin	17.7182	5.22824e-06	0.000133639
	PE(20:2(11Z,14Z)/15:0) Esi+ 2.1709998	21.7664	5.35849e-06	0.000134105
	limit Esi+ 3.5059986 :52	16.6415	5.37445e-06	0.000134105
	C21 H26 N6 O15	17.2908	5.50279e-06	0.000135692
	D-Urobilin Esi+ 5.2100024	17.9226	6.04951e-06	0.000147439
	Palatinose Esi+ 8.342002	19.3162	6.71441e-06	0.000161763
	PE(15:0/14:0) Esi+ 1.6469998	15.6479	6.92239e-06	0.000164202
	C45 H8 N4 O2	11.6469	6.99381e-06	0.000164202
	limit Esi+ 1.6339997	22.5457	7.05067e-06	0.000164202
	limit Esi+ 3.5059986	16.6649	7.38154e-06	0.000170019
	limit Esi+ 6.600999	13.1192	7.83857e-06	0.000178583
	2-Hydroxy-6-oxonona-2,4-diene-1,9-dioate	21.515	8.82454e-06	0.000198581
	9-Chloro-11beta,17beta-dihydroxy-17-methylandrost-4-en-3-one	13.211	8.90585e-06	0.000198581
	Glucosisymbrin	14.2996	1.0214e-05	0.00022351
	C22 H16 N2	15.374	1.02371e-05	0.00022351
	L-beta-aspartyl-L-glutamic acid	18.5511	1.12887e-05	0.000242138
	L-Galactose Esi+ 8.345	16.2978	1.13214e-05	0.000242138
	3beta-hydroxy-4beta-methyl-5alpha-cholest-7-ene-4alpha-carbaldehyde	14.9249	1.39517e-05	0.00029538
	Nitrofurazone	17.9066	1.56603e-05	0.00032824
	DG(16:0/18:3(6Z,9Z,12Z)/0:0) Esi+ 4.7270007	16.9433	1.65446e-05	0.000343342
	PG(16:1(9Z)/16:1(9Z))	18.3568	1.73252e-05	0.000356015
	Isosorbide dinitrate	21.6261	2.09758e-05	0.000426847
	limit Esi+ 6.483998	14.6621	2.13326e-05	0.000429933
	limit Esi+ 1.2560004 :92	13.9661	2.17173e-05	0.000433518
	D-Urobilin Esi+ 5.2100024 :25	17.7034	2.29596e-05	0.000453993
	limit Esi+ 1.5709995	13.5387	2.40607e-05	0.000467372
	Isopentenyladenosine-5'-triphosphate	15.8505	2.40821e-05	0.000467372
	limit Esi+ 4.684001	16.6003	2.52223e-05	0.000485008
	C4 H5 N4 O	17.1212	2.69009e-05	0.000512585
	PE(20:2(11Z,14Z)/15:0) Esi+ 2.1709998 :0	21.772	2.84305e-05	0.000535197
	limit Esi+ 8.873996	13.6162	2.85983e-05	0.000535197
	DG(14:1(9Z)/20:0/0:0) Esi+ 1.4039996	19.3792	3.15886e-05	0.000585926
	Zafirlukast	14.9553	3.22634e-05	0.000593194
	Arachidonoyl dopamine Esi+ 1.73	15.21	3.25508e-05	0.000593273
	3-hydroxy-sebacic acid	16.2488	3.47477e-05	0.000627855
	limit Esi+ 8.287997	14.5955	3.62662e-05	0.000649693
	6-Methylthioguanosine monophosphate	17.7277	3.7165e-05	0.000660152
	2-Nitrofuran	17.0973	4.43912e-05	0.000781882
	C35 H56 N11	15.0033	4.63418e-05	0.000808586
	C33 H67 N4 O4	19.5552	4.66789e-05	0.000808586
	C34 H45 N4 O	15.2253	4.81953e-05	0.000828011
	Palatinose Esi+ 9.411002	16.709	5.01403e-05	0.000854424
	C34 H69 N8 O4	16.9452	5.07648e-05	0.000858088
	Floxacillin	15.81	5.28655e-05	0.000886448
	C17 H2 N	18.1031	5.53007e-05	0.000919923
	limit Esi+ 1.5719995	13.5813	5.81168e-05	0.000945425
	PE(20:3(5Z,8Z,11Z)/14:0)	21.3124	5.8181e-05	0.000945425
	D-Urobilin	17.2564	5.8187e-05	0.000945425
	CE(20:1(11Z))	12.2464	5.9428e-05	0.000953612
	C46 H64 O	15.3724	5.96008e-05	0.000953612
	limit Esi+ 1.5149996	15.071	6.29605e-05	0.000999737
	Uridine diphosphate-N-acetylglucosamine	16.2522	6.36569e-05	0.00100319
	C37 H45 N6	14.1266	6.61133e-05	0.00103413
	PE(22:1(13Z)/15:0) Esi+ 2.1129992	22.0089	6.94106e-05	0.00107766
	Isoguanosine	17.1326	7.21806e-05	0.00110889
	C31 H68 N11	14.1597	7.33034e-05	0.00110889
	2,2-Dibutyl-3-(4-methoxyphenyl)-4-methyl-2H-1-benzopyran-7-ol acetate Esi+ 4.6269994 :44	16.9065	7.34627e-05	0.00110889
	limit Esi+ 1.535	13.9077	7.35379e-05	0.00110889
	limit Esi+ 2.0889995	21.5232	7.50653e-05	0.00112383
	10-Deoxymethynolide	13.7797	7.65375e-05	0.00113775
	C28 H15 N5 O12	13.9038	8.02876e-05	0.00118509
	2-hydroxy-iminostilbene	15.5711	8.15403e-05	0.00119516
	C29 H45 N9 O2 Esi+ 1.7560002	16.8651	8.54714e-05	0.00124408
	limit Esi+ 1.3050002	17.0501	9.23859e-05	0.00133545
	1-Aminocyclohexanecarboxylic acid	16.4164	9.32939e-05	0.00133934
	C19 H22 N O7	13.8492	0.000104512	0.00149018
	C23 H16 O13	17.3814	0.000113925	0.00161342
	5-Formyl-5,6,7,8-tetrahydromethanopterin	16.7932	0.000122154	0.00171835
	Deacetylcephalosporin C	15.3856	0.000125186	0.00174926
	202-791	15.9334	0.000126496	0.00175586
	Hydroxychlorobactene glucoside	16.7997	0.000132154	0.00182234
	Tiamulin Esi+ 1.697999	22.1878	0.000139831	0.00191559
	C38 H71 N11	16.6593	0.000143862	0.00195802
	PE(18:2(9Z,12Z)/15:0)	16.9047	0.000150138	0.00201853
	C31 H31 N O	12.7356	0.000151083	0.00201853
	C44 H59 O4	14.2706	0.000151197	0.00201853
	C8 H20 N7 O2 Esi+ 6.227002	17.7005	0.000154545	0.00205017
	C29 H15 N12 O9	14.1561	0.000157019	0.00206988
	PE(18:1(11Z)/18:2(9Z,12Z))	22.5297	0.000158123	0.00207141
	DG(14:0/14:1(9Z)/0:0)	19.2797	0.000159685	0.00207888
	Taurohyocholic acid Esi+ 1.7459996	14.966	0.00016625	0.00215099
	N-Benzoyl-D-arginine-4-nitroanilide	17.881	0.000171809	0.00220928
	4-Hydroxydebrisoquine	14.9648	0.000177503	0.00226858
	C37 H62 N3 O	18.3355	0.000179646	0.00228205
	C44 H62	14.0842	0.000182944	0.00230496
	3,6-Anhydrogalactose Esi+ 8.341002	17.1068	0.000184245	0.00230496
	Mannose 1-phosphate	18.8902	0.000184749	0.00230496
	C11 H14 N4 O12	15.4889	0.000187678	0.00232765
	C24 H41 N3 O18	15.3661	0.000198952	0.00245296
	Moxifloxacin	14.2825	0.00021328	0.00260477
	Lasiocarpine	17.893	0.00021375	0.00260477
	Cymarin	17.2093	0.000215056	0.00260553
	Galactomannan Esi+ 8.458005	20.2661	0.000220175	0.00265223
	limit Esi+ 4.6900015	16.8234	0.000234702	0.00280893
	Lasiocarpine Esi+ 4.9290004	17.8951	0.000235864	0.00280893
	Naptalam	16.3421	0.000238621	0.0028257
	C25 H54 N12	12.3032	0.000245804	0.00289441
	Tetraneurin A Esi+ 6.483998	13.0896	0.0002546	0.00298124
	limit Esi+ 1.264	16.3953	0.000268109	0.00312198
	DG(14:1(9Z)/18:1(9Z)/0:0) Esi+ 1.3940008	18.4174	0.000281101	0.00325518
	C18 H25 O24	16.7647	0.000287163	0.00330711
	1,2-Di-(9Z,12Z,15Z-octadecatrienoyl)-3-(Galactosyl-alpha-1-6-Galactosyl-beta-1)-glycerol	15.9693	0.00029146	0.00333825
	DG(14:0/14:1(9Z)/0:0) Esi+ 1.5029993	13.3246	0.000300807	0.00342658
	C28 H55 N19 O	13.8221	0.000304625	0.00342782
	limit Esi+ 1.2599995	12.8054	0.000305458	0.00342782
	C47 H83 N3 O3	16.8584	0.000305822	0.00342782
	limit Esi+ 1.2340002	14.4991	0.000309101	0.00344615
	Stigmatellin Y	16.5582	0.000311325	0.00345257
	C18 H25 N	16.605	0.000323711	0.00357105
	C34 H62 N4 O4	14.5034	0.000328658	0.00360664
	PE(18:0/14:1(9Z))	21.362	0.000330962	0.00361301
	C19 H17 N9 O9	16.1637	0.000338363	0.00367465
	C36 H59 N2 O3	17.4516	0.000357086	0.003858
	limit Esi+ 4.7270007	17.2613	0.000387944	0.0041699
	C18 H27 O22 S	14.7374	0.00040177	0.00429309
	2-Oxoarginine	23.3354	0.000403502	0.00429309
	C39 H49 N6	13.3131	0.000474019	0.00501789
	Taurine	22.0394	0.000487711	0.0051369
	limit Esi+ 7.0090017 :149	13.7052	0.000504294	0.005285
	LysoPE(0:0/18:1(11Z))	23.4715	0.000528227	0.00550828
	Inositol cyclic phosphate	15.5856	0.000552888	0.0057369
	Thiophene-2-carbonyl-CoA	13.1406	0.000561866	0.00580134
	C27 H22 N6 O12	14.031	0.000590553	0.00606764
	2-amino-3-oxo-hexanedioic acid	16.9996	0.000612643	0.0062639
	LysoPE(0:0/18:1(11Z)) Esi+ 1.7149998	23.3131	0.000618118	0.0062892
	D-Urobilin Esi+ 5.4550014	16.966	0.000624225	0.00632066
	Phaseolotoxin	13.8007	0.00062841	0.00633244
	1-methylhistidine Esi+ 8.5570965	18.8791	0.000632167	0.00633485
	C5 H13 N4 O2	20.0957	0.000637195	0.00633485
	zeta-Carotene	17.0337	0.000637716	0.00633485
	2-Oxoarginine Esi+ 8.704997	23.3396	0.000647111	0.00639785
	limit Esi+ 1.361	17.0405	0.000655958	0.00645487
	C34 H61 N5 O	20.1918	0.00069495	0.00680662
	D-Urobilin Esi+ 5.4550014 :27	16.8163	0.000719188	0.00701125
	D-Hamamelose Esi+ 6.6340017	20.7165	0.000735388	0.00713599
	D-Hamamelose	20.7188	0.000740714	0.00715455
	CI Basic red 9	17.4963	0.000745542	0.00716815
	Piperaduncin B	14.5224	0.000769835	0.00736792
	D-Urobilin Esi+ 4.923997	17.4876	0.000787902	0.00750357
	C29 H23 N17 O	12.6017	0.000791168	0.00750357
	C21 H43 N16 O9	15.9732	0.00081367	0.00768222
	Isoflavone 7-O-beta-D-glucoside	20.2462	0.000832064	0.0078179
	PE(20:3(5Z,8Z,11Z)/14:0) Esi+ 1.6360006	20.5844	0.000835501	0.0078179
	Pamidronate	16.0747	0.000859998	0.00801136
	C20 H14 N12 O14	13.1097	0.000908303	0.00842391
	CDP-ethanolamine	14.4837	0.000929156	0.00857935
	limit Esi+ 1.7519996	15.7412	0.000933263	0.00857947
	Glipizide	13.7573	0.000939062	0.00859433
	C15 H24 N9 O9	16.075	0.00094308	0.00859433
	L-Iditol	17.0337	0.000968634	0.00875663
	DU 122290	20.0397	0.000969245	0.00875663
	Ethoprop Esi+ 6.649001	18.1897	0.00100687	0.00905754
	Deacetyldiltiazem	16.6078	0.00102088	0.00910886
	Cellohexaose	16.2121	0.00102507	0.00910886
	Tiamulin	22.8862	0.00102562	0.00910886
	C33 H64 N6 O3	17.8836	0.0010643	0.00941256
	C44 H59 O4 Esi+ 1.6479999	14.3023	0.00107146	0.00943609
	(R)-Salsolinol	15.7093	0.00109421	0.00959612
	C45 H43 N2	15.0924	0.00110353	0.00963751
	C24 H43 N2 O	13.7027	0.00111328	0.00968231
	DG(14:1(9Z)/16:0/0:0)	20.1114	0.00111874	0.00968957
	FMNH	15.2759	0.00113055	0.00975158
	PE(20:0/18:3(9Z,12Z,15Z)) Esi+ 6.238003	15.3541	0.00115551	0.00992606
	Ginkgetin	14.2554	0.00116267	0.0099468
	C15 H34 N3 O16	14.0787	0.00122555	0.0104421
	PE(18:1(11Z)/16:0)	20.7137	0.00125797	0.0106749
	Deoxytubulosine	16.4185	0.00132692	0.0112146
	Lacto-N-triaose	15.0149	0.00133907	0.0112719
	C32 H61 N16 O2	16.7924	0.00134798	0.0113014
	C14 H14 N2 O17 S	22.52	0.00136946	0.0114358
	C12 H11 N8 O4	13.3708	0.00139559	0.0116077
	C24 H25 N O10	14.6918	0.00140717	0.0116578
	Maltohexaose	17.1876	0.00145349	0.0119942
	C4 H3 N2 O3	17.2887	0.00147802	0.0121161
	PE(16:1(9Z)/15:0) Esi+ 2.2829995	16.9595	0.00147983	0.0121161
	PI(16:2(9Z,12Z)/16:0)	16.6114	0.00158555	0.0129312
	C35 H58 N2 O	12.3395	0.00161268	0.0131015
	D-Fuconate	19.662	0.0016885	0.0136645
	limit Esi+ 1.5130004	13.05	0.0017034	0.013732
	limit Esi+ 1.7389994	17.6256	0.00171678	0.0137868
	C14 H35 N9 O	16.4022	0.0017332	0.0138656
	Pantothenic Acid	18.4326	0.00178364	0.0142149
	C44 H77 N5 O2	16.1659	0.00184477	0.0146183
	C23 H53 N16	17.9318	0.00184821	0.0146183
	PE(24:0/20:3(5Z,8Z,11Z))	15.1285	0.00191511	0.0149748
	PE(18:1(11Z)/18:3(9Z,12Z,15Z))	20.9482	0.00192081	0.0149748
	Anapheline	18.5479	0.00192084	0.0149748
	PE(18:1(11Z)/16:0) Esi+ 2.222	21.7615	0.00192186	0.0149748
	D-Asparagine	17.5862	0.00193397	0.0150133
	N-a-Acetylcitrulline	15.2571	0.00206792	0.015994
	L-Glutamate	21.5428	0.00221908	0.017036
	Leukotriene E3	15.6503	0.00222143	0.017036
	none Esi+ 7.095998 :104	13.9021	0.00222703	0.017036
	DG(14:1(9Z)/18:1(9Z)/0:0) Esi+ 4.755001	16.7851	0.00242589	0.0184897
	PG(18:0/18:3(9Z,12Z,15Z))	20.0087	0.00244233	0.0185476
	C39 H81 N10 O3	14.8495	0.00250627	0.0189644
	PE(22:2(13Z,16Z)/15:0) Esi+ 2.1259997	22.4653	0.00252089	0.0190064
	limit Esi+ 2.080001	18.2145	0.00254655	0.0191311
	PE(24:1(15Z)/14:1(9Z))	18.1343	0.00258993	0.0193875
	Saccharocin	14.6698	0.00264366	0.0197193
	C14 H18 N2 O18	14.8356	0.00276672	0.020564
	C12 H33 N12	15.8049	0.00286965	0.0212537
	C24 H55 N4 O5 Esi+ 1.2599994	14.5277	0.00294563	0.0217396
	C22 H19 N13 O14	13.7144	0.00300596	0.0220564
	C35 H20 N10 O10	15.3504	0.00300961	0.0220564
	Cymarin Esi+ 4.925002	17.0005	0.00304232	0.0222185
	DG(16:0/18:3(6Z,9Z,12Z)/0:0)	19.2333	0.00325978	0.0237239
	limit Esi+ 1.7299999	17.5058	0.00330709	0.023985
	C21 H41 N5 O2	17.1114	0.00356204	0.0257449
	limit Esi+ 6.5110006	13.1425	0.00358051	0.0257895
	3,6-Anhydrogalactose Esi+ 6.6260033	17.4302	0.00359533	0.0258076
	PE(22:2(13Z,16Z)/15:0)	23.5253	0.00372245	0.0266289
	CE(22:2(13Z,16Z))	13.4286	0.0037833	0.0269384
	PG(16:1(9Z)/18:2(9Z,12Z))	19.8444	0.00379143	0.0269384
	Cellopentaose Esi+ 9.411997	15.9527	0.00381468	0.0270121
	limit Esi+ 7.3000007 :109	14.096	0.00390728	0.0275746
	Luteolin 7-O-[?-D-glucuronosyl-(1-2)-?-D-glucuronide]	14.3226	0.00400466	0.028167
	C32 H67 Cl N3 O4	18.0544	0.00418096	0.0292608
	?,?'-Trehalose 6-phosphate	14.2268	0.0041881	0.0292608
	PE(22:1(13Z)/20:0)	16.9472	0.00422187	0.0293988
	C32 H49 N3	16.9987	0.00433443	0.0300619
	PE(20:2(11Z,14Z)/18:2(9Z,12Z))	17.1875	0.00436004	0.0300619
	limit Esi+ 1.6419992	17.3849	0.00436012	0.0300619
	C34 H51 N6 O4	12.973	0.00454538	0.0312365
	2,2,4-Trimethyl-3-(4-fluorophenyl)-2H-1-benzopyran-7-ol acetate	20.6574	0.00470634	0.0322369
	limit Esi+ 1.2550001 :98	14.359	0.0047544	0.03246
	2-Hydroxymyristic Acid Esi+ 3.938002	14.909	0.00482397	0.0328281
	MG(0:0/16:1(9Z)/0:0) Esi+ 5.4550014	15.5184	0.00486573	0.0330051
	5-Ureido-4-imidazole carboxylate	17.4794	0.0050062	0.0338484
	C30 H42 N6 O7	19.2822	0.00522483	0.035213
	limit Esi+ 1.2989999	14.299	0.00545504	0.0366467
	N-Glycoloylganglioside GM2	17.1395	0.00559043	0.0374145
	C18 H38 N7	18.2544	0.00560503	0.0374145
	C21 H47 N10 O2	14.9914	0.00576439	0.0383561
	Galactomannan Esi+ 8.339997	20.3032	0.00581672	0.0385281
	Tetraneurin A	13.7797	0.00582701	0.0385281
	C23 H27 N13 O12 S2	14.6273	0.00588593	0.0387953
	Vicenistatin Esi+ 1.3650006	14.9062	0.00598216	0.039306
	3-Oxopimelyl-CoA	13.6804	0.00605744	0.0396762
	C15 H39 N7 O5	17.6029	0.00618538	0.040388
	2,7-Anhydro-alpha-N-acetylneuraminic acid	16.4517	0.00629129	0.040952
	C24 H55 N4 O5	14.4799	0.00633338	0.0410984
	Dimethyl 4,4-o-Phenylene-Bis (3-Thiophanate)	13.6221	0.00646628	0.0418313
	Cyanopeptolin A Esi+ 7.0669994	15.5031	0.00658341	0.0424579
	none Esi+ 7.093998	13.4593	0.00680675	0.0437637
	limit Esi+ 7.0919995	16.1123	0.00685156	0.043917
	limit Esi+ 7.0090017 :150	13.3046	0.00690912	0.044151
	C29 H65 Cl N9 O2	17.1964	0.00694893	0.0442704
	C21 H51 Cl N9	16.5805	0.00709322	0.0450527
	C28 H54 N8 O3	17.2108	0.0071535	0.0452983
	C28 H51 N8	17.5366	0.00722927	0.0456402
	N6-Methyl-2'-deoxyadenosine	19.689	0.00728995	0.0458851
	C42 H86 Cl N O	13.4784	0.00733224	0.0460131
	(+)-gamma-Hydroxy-L-homoarginine	17.3245	0.00739308	0.0462564
	PE(20:1(11Z)/15:0)	22.821	0.00746252	0.0464364
	C47 H8 N10 O	14.4332	0.00746616	0.0464364
	limit Esi+ 6.5169992	14.3136	0.00752652	0.0466733
	C24 H14 N11 O	12.8078	0.0075913	0.0469362
	Flecainide	17.5371	0.00766779	0.0472697
	C9 H18 N4 O7	16.8171	0.0077734	0.0477802
	DU 122290 Esi+ 6.608998	19.3733	0.00817235	0.0499768
	C5 H6 N5 O2	18.4024	0.00817845	0.0499768
	LysoPE(0:0/20:0) Esi+ 1.6819994	16.125	0.00835738	0.0509217
	3-Hydroxy-L-tyrosyl-AMP	15.4946	0.00838561	0.0509456
	Gibberellin A3	17.2429	0.00845039	0.0511908
	limit Esi+ 1.787	14.5351	0.00869537	0.052486
	limit Esi+ 7.101 :138	13.4861	0.00871427	0.052486
	Allantoate Esi+ 4.294001	17.3878	0.00877349	0.0526132
	C23 H29 N4 O12 S4	14.7329	0.00880509	0.0526132
	C24 H21 N13 O10	13.7803	0.00881071	0.0526132
	Allantoate	17.3983	0.00889105	0.0529422
	C25 H45 N O4	15.0672	0.00908383	0.0539369
	limit Esi+ 1.2089998	12.2059	0.0092366	0.0546338
	Cyanopeptolin A	15.476	0.00925334	0.0546338
	C33 H53 O12	19.6084	0.00947771	0.0558013
	Tetraneurin A Esi+ 7.7850027	13.8773	0.00969051	0.0568945
	C33 H10 N9 O	15.8093	0.00976986	0.0570444
	Galactomannan	20.73	0.00979635	0.0570444
	PG(16:1(9Z)/20:3(5Z,8Z,11Z))	19.686	0.00981959	0.0570444
	none Esi+ 1.4959993	15.8955	0.00982491	0.0570444
	4-Guanidinobutanamide	17.8992	0.0100803	0.0583654
	C11 H20 N O S	15.3075	0.0101632	0.0586835
	PE(24:1(15Z)/20:4(8Z,11Z,14Z,17Z))	12.925	0.0102041	0.0587579
	C36 H69 N S	18.703	0.0103625	0.0595061
	PE(16:1(9Z)/18:0)	13.3708	0.0105476	0.060404
	DG(16:1(9Z)/18:1(11Z)/0:0)	20.6537	0.0106708	0.0609426
	limit Esi+ 1.7439998	16.946	0.0110121	0.0627209
	L-Galactose Esi+ 6.636997	18.4131	0.0110519	0.062777
	limit Esi+ 1.2529994 :95	14.1871	0.0111509	0.0630809
	TG(18:1(11Z)/18:0/18:1(11Z))[iso3]	15.1678	0.0111656	0.0630809
	3-O-Acetylhamayne	18.2132	0.011335	0.0638662
	PE(20:1(11Z)/15:0) Esi+ 2.169999	21.7772	0.0113972	0.0640442
	2,2-Dibutyl-3-(4-methoxyphenyl)-4-methyl-2H-1-benzopyran-7-ol acetate Esi+ 4.6260023	16.919	0.011619	0.0651159
	none Esi+ 7.101 :120	13.385	0.0120705	0.0674659
	limit Esi+ 1.2540005 :153	13.1942	0.0123733	0.0689748
	limit Esi+ 1.7050009	18.7799	0.0124633	0.069292
	LysoPE(20:1(11Z)/0:0) Esi+ 1.6889997	16.1003	0.0125241	0.0694456
	C22 H35 N3	16.7401	0.012571	0.0695218
	limit Esi+ 1.7109995	15.3386	0.0131302	0.0724237
	PE(20:1(11Z)/15:0) Esi+ 6.600999	12.3826	0.0133345	0.0733575
	C19 H23 N10 O12 S	15.5045	0.013415	0.073607
	C5 H12 N5 O	15.7637	0.0136361	0.074625
	N1-(5-Phospho-a-D-ribosyl)-5,6-dimethylbenzimidazole	16.2172	0.0137639	0.0751282
	Phosphoric acid	21.7124	0.0139632	0.0760179
	C25 H38 N14	18.1208	0.0140242	0.0761523
	Dimethirimol Esi+ 9.402005	17.9785	0.0140994	0.0762647
	limit Esi+ 7.102001 :116	13.3259	0.0141177	0.0762647
	C28 H37 N17	15.0665	0.0144906	0.0780778
	none Esi+ 7.101 :80	14.2126	0.0145636	0.07827
	C15 H33 N20	22.2379	0.0149656	0.0802249
	N1-(5-Phospho-a-D-ribosyl)-5,6-dimethylbenzimidazole Esi+ 7.7109995 :64	16.2635	0.0151915	0.0812279
	C36 H78 N14 O2	17.7369	0.0154842	0.0825825
	PI(18:1(11Z)/18:2(9Z,12Z))	14.6569	0.0156711	0.0833672
	C19 H35 N5	18.2151	0.0157973	0.0838258
	DG(O-16:0/18:1(9Z))	17.0446	0.0161045	0.0852398
	C36 H60 S	16.5701	0.0161958	0.0855075
	2-Methylacetoacetyl-CoA	14.6706	0.0163937	0.0863349
	C35 H59 N3 O2	18.1859	0.0164422	0.0863731
	C29 H46 N2 O11	18.7223	0.0168658	0.0883767
	C31 H22 N4 O18	14.454	0.01694	0.0885444
	limit Esi+ 1.6959994	16.5528	0.0170128	0.0887034
	C9 H2 N2 O S Esi+ 7.3940005	19.0477	0.0172887	0.0899182
	ADP-D-glycero-D-manno-heptose	17.2767	0.0175468	0.0909064
	Lycomarasmine B Esi+ 7.1759977	13.5808	0.0175654	0.0909064
	DG(20:2(11Z,14Z)/18:4(6Z,9Z,12Z,15Z)/0:0)	16.0951	0.0176167	0.0909475
	C36 H73 N7 O4	16.0471	0.0177177	0.0912437
	TG(18:0/14:0/18:2(9Z,12Z))[iso6]	15.5104	0.0180068	0.0925057
	Gatifloxacin	16.0168	0.0181127	0.0928141
	CE(20:3(8Z,11Z,14Z))	13.9071	0.0181916	0.0928141
	limit Esi+ 1.3380004	14.3348	0.0182401	0.0928141
	3,6-Anhydrogalactose Esi+ 8.341002 :156	16.8656	0.018244	0.0928141
	DU 122290 Esi+ 6.608998 :69	19.4883	0.0183231	0.0929906
	Diloxanide-O-Glucuronide	15.8406	0.0184407	0.0932029
	C35 H68 Cl N7	15.2001	0.0184538	0.0932029
	C29 H57 N4 O4	16.8114	0.0187589	0.094516
	C39 H62 O2	18.0297	0.0189164	0.095081
	none Esi+ 6.761997	18.9472	0.019042	0.0954834
	limit Esi+ 7.101 :24	15.608	0.0191246	0.0955184
	TG(16:1(9Z)/18:0/18:1(11Z))[iso6]	16.0311	0.0191401	0.0955184
	FAPy-adenine	21.335	0.0192734	0.0957702
	limit Esi+ 1.3149997	15.8758	0.019282	0.0957702
	limit Esi+ 5.1589975	14.8551	0.0198203	0.0982113
	limit Esi+ 1.3919994	15.017	0.0202123	0.0999173
AveExpr: average log2-abundance for the metabolite over all samples.
P.value: raw p-value
FDR:Benjamini and Hochberg's method to control false discovery rate

## Sheet: Panel C
Ionization Mode	Metabolite	AveExpr	P.value	FDR
Negative	PE(22:1(13Z)/20:4(5Z,8Z,11Z,14Z))	13.7054	1.12163e-06	0.000863636
	C25 H52 N22 O2	17.2528	1.88567e-06	0.000863636
	PA(16:0/16:0) Esi- 1.3059999	14.017	2.97546e-06	0.000908506
	7-Methylxanthine Esi- 6.9859962	16.4112	7.40251e-06	0.00146212
	PE(20:3(5Z,8Z,11Z)/20:1(11Z))	16.7746	7.981e-06	0.00146212
	5-Fluorouridine monophosphate	13.9746	1.04437e-05	0.0015944
	PE(20:1(11Z)/20:3(5Z,8Z,11Z))	16.8885	1.87916e-05	0.00245901
	C27 H58 N6 O2	15.3771	3.57944e-05	0.0033137
	Diclofop	13.6164	3.79848e-05	0.0033137
	C22 H9	13.7797	3.87931e-05	0.0033137
	PA(18:1(11Z)/18:1(9Z))	16.0569	3.97934e-05	0.0033137
	CAI-1	16.277	6.13027e-05	0.00453345
	LysoPE(0:0/18:0)	15.4199	6.43393e-05	0.00453345
	7-Methylxanthine	16.5067	9.12538e-05	0.00594127
	LysoPE(0:0/14:0) Esi- 4.8890023	15.4356	9.72915e-05	0.00594127
	PE(18:3(9Z,12Z,15Z)/22:0) Esi- 2.2089999	17.3178	0.000127719	0.00731193
	LysoPE(0:0/14:0)	15.1749	0.000143599	0.00773744
	Terpenoid EA-I	16.805	0.000266876	0.013581
	CE(10:0)	15.3915	0.000290889	0.0140239
	DG(16:0/14:0/0:0)	13.7614	0.000331762	0.0142628
	C28 H9 N7 O14	12.8158	0.000340321	0.0142628
	PA(16:0/18:1(9Z))[U]	15.7436	0.000342557	0.0142628
	limit Esi- 1.5940008	14.0217	0.000392577	0.0156348
	DG(14:1(9Z)/16:0/0:0) Esi- 1.2120006	13.658	0.000442352	0.0168831
	C10 H16 N O2	14.2863	0.000478453	0.0169143
	Terpenoid EA-I Esi- 5.382999 :6	16.3762	0.000524961	0.0169143
	Terpenoid EA-I Esi- 5.382999	16.3762	0.000532624	0.0169143
	Terpenoid EA-I Esi- 5.382999 :31	16.3762	0.000535496	0.0169143
	Terpenoid EA-I Esi- 5.382999 :17	16.3762	0.000535496	0.0169143
	C30 H58 O4	16.9956	0.000584682	0.0173585
	limit Esi- 1.6119998	15.005	0.000587461	0.0173585
	DG(22:6(4Z,7Z,10Z,13Z,16Z,19Z)/20:5(5Z,8Z,11Z,14Z,17Z)/0:0)	15.6971	0.000679067	0.0189544
	C36 H5 N6 O3	13.6353	0.000682853	0.0189544
	C32 H62 O4	18.5047	0.000706286	0.0190282
	PG(16:1(9Z)/16:1(9Z))	20.0763	0.000766242	0.0195201
	MID74682:Tetradecanoic acid, 3-hydroxy-, (R)-; Tetradecanoic acid, 3-hydroxy-, D-(-)-; (3R)-3-Hydrox	15.4607	0.000767164	0.0195201
	16-hydroxy hexadecanoic acid	23.3484	0.000834407	0.02039
	Pentadecylic acid	17.9566	0.00086073	0.02039
	Halstoctacosanolide A Esi- 1.6139994	15.1011	0.000868131	0.02039
	PE(18:1(11Z)/15:0)	15.7078	0.000910119	0.0208131
	C16 H30 O2	23.3395	0.000936371	0.0208131
	Ubiquinone 8 Esi- 1.2949992	14.5841	0.000954311	0.0208131
	di-trans,poly-cis-undecaprenyl diphosphate	15.286	0.00100451	0.0209139
	LysoPE(0:0/14:0) Esi- 1.6109998	15.2786	0.0010046	0.0209139
	C5 H9 N O2	19.359	0.00105621	0.0214996
	1-Palmitoyl Lysophosphatidic Acid	13.6821	0.00132481	0.026381
	C27 H52 N O2	12.3224	0.00145221	0.0283027
	PA(16:0/16:0)	16.9298	0.00156603	0.0286426
	PE(18:3(9Z,12Z,15Z)/22:0)	17.1452	0.00162121	0.0286426
	6,8a-Seco-6,8a-deoxy-5-oxoavermectin ''1b'' aglycone Esi- 5.3659983	13.576	0.00163768	0.0286426
	(3R,2'S)-Myxol 2'-(2,4-di-O-methyl-?-L-fucoside)	15.982	0.00165878	0.0286426
	C12 H28 N9 O2	15.7953	0.00168759	0.0286426
	Palmitic Acid methyl ester	17.8846	0.00170631	0.0286426
	C13 H26 N2 O2	14.7331	0.00171931	0.0286426
	4-Pyridoxic acid	13.7022	0.00174286	0.0286426
	Ubiquinone 8	14.5301	0.00175108	0.0286426
	Propapyriogenin A2	16.6367	0.00178467	0.02868
	N-Cyclopropylammelide Esi- 6.957	17.3893	0.00216251	0.0341528
	6,8a-Seco-6,8a-deoxy-5-oxoavermectin ''1b'' aglycone	14.1633	0.00228628	0.0354955
	Halstoctacosanolide A	15.3124	0.00240606	0.0367326
	LysoPE(0:0/16:1(9Z))	20.094	0.0028316	0.0419973
	PE(18:3(9Z,12Z,15Z)/18:1(11Z))	17.1692	0.00284261	0.0419973
	DL-Methionine sulfoxide	19.4237	0.00310486	0.0445042
	DL-Methionine sulfoxide Esi- 7.523999	19.4234	0.00310946	0.0445042
	limit Esi- 4.7420006	13.7499	0.00369194	0.0515294
	C28 H54 O4	14.7479	0.00371282	0.0515294
	DG(16:1(9Z)/16:0/0:0)	13.6975	0.00393739	0.0533814
	all-trans-8'-Apo-beta-carotenal	14.2287	0.00396281	0.0533814
	1-Hydroxy-2-aminoethylphosphonate Esi- 7.549999	14.565	0.004028	0.0534732
	10,16-dihydroxy-palmitic acid	13.6913	0.00431715	0.0563225
	1-Hydroxy-2-aminoethylphosphonate	14.5605	0.00438887	0.0563225
	C7 H7 N2 O4	15.8003	0.0044271	0.0563225
	12-Hydroxydodecanoic acid	14.8468	0.00448965	0.0563359
	D-Glutamine	19.1645	0.00471177	0.0576106
	Uric acid	17.7969	0.00471702	0.0576106
	Propapyriogenin A2 Esi- 5.3209996	15.4976	0.00491038	0.059183
	C20 H11 N12 O7	14.5586	0.00503675	0.0599177
	C31 H60 O7	17.8146	0.00511369	0.0600531
	2,8-Dihydroxyadenine	14.9842	0.00545419	0.06089
	Myristic acid	21.5635	0.00548467	0.06089
	Propapyriogenin A2 Esi- 5.320003 :19	15.8633	0.00549492	0.06089
	2,2-Dibutyl-3-(4-methoxyphenyl)-4-methyl-2H-1-benzopyran-7-ol acetate	17.4722	0.00551076	0.06089
	Propapyriogenin A2 Esi- 5.320003	15.8632	0.00551732	0.06089
	2,2-Bis(4-hydroxyphenyl)hexafluoropropane	14.9771	0.0063332	0.069062
	2,2-Dibutyl-3-(4-methoxyphenyl)-4-methyl-2H-1-benzopyran-7-ol acetate Esi- 1.5979998	17.4763	0.00654822	0.0705667
	C19 H28 N	17.5576	0.00676223	0.0714113
	C14 H30 N6 O3	15.7612	0.00678252	0.0714113
	Debromohymenialdisine	14.7214	0.00698372	0.0726941
	NS-102	13.8642	0.00742825	0.0764525
	2,2-Dibutyl-3-(4-methoxyphenyl)-4-methyl-2H-1-benzopyran-7-ol acetate Esi- 2.431	15.1847	0.0077167	0.0779896
	9-Fluoroprednisolone	13.6172	0.00774788	0.0779896
	Gniditrin	13.9869	0.00796994	0.0788658
	C28 H52 N7 O	13.2615	0.00800712	0.0788658
	PE(20:5(5Z,8Z,11Z,14Z,17Z)/16:1(9Z))	15.1425	0.00827389	0.0800441
	C29 H48 N14 O3	15.9067	0.00832202	0.0800441
	Purine Esi- 8.385997	15.1088	0.0083889	0.0800441
	C31 H62 N5 O3	14.9739	0.00850073	0.0802749
	LysoPE(0:0/22:2(13Z,16Z)) Esi- 1.389	13.6647	0.0089621	0.0829947
	PE(18:1(9Z)/18:3(9Z,12Z,15Z))	17.6009	0.00897253	0.0829947
	(-)-Epinephrine	16.5731	0.00906056	0.0829947
	C19 H28 O2	14.5141	0.00931773	0.083175
	Nelfinavir Esi- 5.432999	16.0099	0.00935032	0.083175
	Phenylacetothiohydroximate	15.9251	0.00935264	0.083175
	Benz[a]acridine	14.3063	0.0100693	0.08787
	LysoPE(20:1(11Z)/0:0)	18.2232	0.0100724	0.08787
	trans-Zeatin	18.247	0.0103539	0.0894731
	Ethyl isovalerate	15.3973	0.0108836	0.0931717
Positive	PE(24:1(15Z)/14:1(9Z))	18.1343	2.11659e-07	0.000443637
	D-Urobilin Esi+ 5.2100024	17.9226	1.14863e-06	0.00120377
	D-Urobilin Esi+ 5.2100024 :25	17.7034	2.70796e-06	0.00189196
	Cymarin	17.2093	4.45881e-06	0.00227656
	DG(15:0/20:2(11Z,14Z)/0:0)	16.7235	6.93572e-06	0.00227656
	limit Esi+ 1.6329997	22.0593	7.16554e-06	0.00227656
	D-Urobilin	17.2564	7.60302e-06	0.00227656
	PE(20:1(11Z)/16:0)	18.7377	9.4444e-06	0.00247443
	Becanamycin	14.9502	1.1767e-05	0.0027404
	PE(18:1(11Z)/18:2(9Z,12Z))	22.5297	2.24677e-05	0.00470924
	C3 H3 N4 O	20.4136	2.68984e-05	0.0047974
	C19 H17 N9 O9	16.1637	2.7466e-05	0.0047974
	Isopentenyladenosine-5'-triphosphate	15.8505	3.25252e-05	0.00524406
	Integerressine Esi+ 5.535999	15.4149	3.88763e-05	0.00582034
	limit Esi+ 1.6339997	22.5457	4.83835e-05	0.00663396
	limit Esi+ 7.208004	14.6559	5.06409e-05	0.00663396
	limit Esi+ 5.1589975	14.8551	6.06205e-05	0.0073292
	Ginkgetin	14.2554	6.29416e-05	0.0073292
	(+)-gamma-Hydroxy-L-homoarginine	17.3245	7.74353e-05	0.00851503
	C28 H42 N6 O S	15.6732	8.14605e-05	0.00851503
	C32 H54 N4	17.8112	8.53128e-05	0.00851503
	2-hydroxy-iminostilbene	15.5711	9.62977e-05	0.00861756
	limit Esi+ 1.6320001	18.7004	9.66877e-05	0.00861756
	Usambarine	19.711	9.86744e-05	0.00861756
	PE(22:1(13Z)/15:0)	22.5625	0.000109843	0.00920921
	C29 H56 O5	20.1143	0.000122967	0.00949215
	C24 H13 N7 O16	14.1615	0.000123429	0.00949215
	DG(14:0/14:0/0:0)	20.0129	0.00012769	0.00949215
	PE(18:1(11Z)/15:0)	20.772	0.00013586	0.00949215
	C5 H6 N5 O2	18.4024	0.000136523	0.00949215
	limit Esi+ 2.0960004	17.8738	0.00014039	0.00949215
	C30 H58 N2 O4	16.7193	0.000155874	0.0102098
	C14 H18 N5 O15	13.7143	0.000177588	0.0112795
	C34 H45 N4 O	15.2253	0.000184819	0.0113936
	LysoPE(0:0/20:0) Esi+ 1.6819994	16.125	0.000191728	0.0114818
	C7 H6 N O5	15.1587	0.00022117	0.0126326
	trans-Zeatin riboside triphosphate	14.9645	0.000222999	0.0126326
	Talatizamine	18.9918	0.000243232	0.0132254
	limit Esi+ 4.684001	16.6003	0.000246084	0.0132254
	Molybdopterin guanine dinucleotide	13.701	0.000255513	0.013265
	C4 H5 N4 O	17.1212	0.000259477	0.013265
	Galangin 3,5,7-trimethyl ether	16.7595	0.00027333	0.0135509
	Integerressine Esi+ 5.544002	15.6931	0.000278	0.0135509
	Zanamivir	15.3428	0.000314074	0.0148031
	DG(14:1(9Z)/16:0/0:0) Esi+ 1.4090003	16.5214	0.000317815	0.0148031
	TG(10:0/10:0/10:0)	16.4175	0.00032781	0.0149367
	PE(16:0/15:0)	17.8529	0.00034234	0.0152669
	DL-Indole-3-lactic acid (3-Indolelactic acid)	17.7136	0.000388107	0.0165152
	LysoPE(0:0/14:0)	18.1608	0.000390321	0.0165152
	Deacetylcephalosporin C	15.3856	0.000393969	0.0165152
	C21 H28 N23 O	16.6948	0.000403673	0.0165902
	Buprenorphine Esi+ 4.597	20.5316	0.000428605	0.0172156
	Sulfadoxine	19.6513	0.000435319	0.0172156
	Taurohyocholic acid Esi+ 1.7459996	14.966	0.00045321	0.0175772
	DG(15:0/20:2(11Z,14Z)/0:0) Esi+ 4.7239995	13.2831	0.000475239	0.0175772
	PE(18:1(11Z)/18:3(9Z,12Z,15Z))	20.9482	0.000476468	0.0175772
	D-Asparagine	17.5862	0.000478007	0.0175772
	C9 H18 N4 O8 S2	16.6959	0.000506135	0.0182907
	D-Urobilin Esi+ 5.4550014 :27	16.8163	0.000529269	0.0188025
	D-Biotin	15.633	0.000547279	0.0191183
	Floxacillin	15.81	0.000563001	0.0193451
	limit Esi+ 4.6900015	16.8234	0.000584446	0.019758
	Meloside A	14.3039	0.00060097	0.0199942
	LysoPE(0:0/16:1(9Z)) Esi+ 4.235998	21.5162	0.000625635	0.0202718
	C40 H71 N5 O3	15.856	0.000628659	0.0202718
	Cymarin Esi+ 4.925002	17.0005	0.000746285	0.0237002
	C36 H73 N7 O4	16.0471	0.000759624	0.0237638
	Triflusulfuron-methyl	14.6759	0.000781194	0.0240791
	C27 H37 N3 S	14.7842	0.000793219	0.0240955
	D-Urobilin Esi+ 4.923997	17.4876	0.000834045	0.024787
	limit Esi+ 1.361	17.0405	0.000839637	0.024787
	L-Glutamate	21.5428	0.000855437	0.0249027
	PE(15:0/18:0) Esi+ 2.2229998	18.3955	0.000886571	0.0254555
	C12 H3 O	16.9259	0.000947956	0.0268502
	PE(22:5(4Z,7Z,10Z,13Z,16Z)/20:3(8Z,11Z,14Z))	14.4127	0.000989936	0.0274089
	Carthamin	16.8966	0.000993834	0.0274089
	C5 H10 N4 O6	19.4394	0.00101825	0.0277177
	C19 H22 N O7	13.8492	0.00104782	0.0281569
	C8 H10 N4 O4	15.7952	0.00108103	0.0286295
	C20 H32 N8 O17 S	19.0496	0.00109273	0.0286295
	Tiamulin Esi+ 1.697999	22.1878	0.00110843	0.0286405
	Rottlerin	13.9423	0.00112048	0.0286405
	Isopentenyl pyrophosphate Esi+ 7.2409983	14.783	0.00122483	0.0309306
	Naptalam	16.3421	0.00125175	0.0310739
	MG(0:0/16:1(9Z)/0:0) Esi+ 5.4550014	15.5184	0.00126015	0.0310739
	MG(0:0/16:1(9Z)/0:0)	16.7119	0.00127727	0.031095
	PE(15:0/18:0)	19.0842	0.00129068	0.031095
	C29 H46 N2 O11	18.7223	0.0013362	0.0315875
	C30 H52 N20	15.6595	0.00135469	0.0315875
	Equilin sulfate	18.6559	0.00137912	0.0315875
	Xanthurenic acid	19.7527	0.0013937	0.0315875
	C30 H42 N6 O7	19.2822	0.00139415	0.0315875
	C40 H83 N3 O3 S	13.9548	0.00141509	0.0315875
	XE991 Esi+ 9.411002	16.3458	0.00141661	0.0315875
	limit Esi+ 7.291996	17.4716	0.00151791	0.03349
	L-Galactose Esi+ 4.9019976 :22	19.4466	0.00154008	0.0336252
	Plantagoside	14.1212	0.00157546	0.034043
	Avermectin A2b	14.8506	0.00160161	0.0342549
	limit Esi+ 2.0889995	21.5232	0.00168085	0.0355865
	limit Esi+ 1.7960002	19.0713	0.0017799	0.0373066
	Piperaduncin B	14.5224	0.00182512	0.0378757
	C29 H37 N10 O	16.8005	0.00185149	0.0380464
	PE(22:5(4Z,7Z,10Z,13Z,16Z)/15:0)	15.3664	0.00196401	0.0391715
	DG(14:0/16:0/0:0)	16.6717	0.00197148	0.0391715
	Azidopine	19.1188	0.00197261	0.0391715
	none Esi+ 7.2960005	14.5686	0.00198122	0.0391715
	MG(0:0/14:0/0:0)	17.2871	0.00200587	0.0391715
	PIP(18:2(9Z,12Z)/18:0)	14.6488	0.00201838	0.0391715
	C26 H16 N9 O14	13.8005	0.00207036	0.0398116
	C21 H41 N12 O3	16.5379	0.00213241	0.0406321
	PE(15:0/16:0)	16.9288	0.00225178	0.0425202
	1,2-Dimethoxy-4-[2-(2-propenyloxy)ethenyl]-benzene	15.9695	0.00234741	0.0436558
	C36 H60 S	16.5701	0.00236289	0.0436558
	2-Oxo-4-methylthiobutanoic acid	21.1951	0.00237441	0.0436558
	3-hydroxy-sebacic acid	16.2488	0.00241865	0.0440826
	C34 H61 N5 O	20.1918	0.00246116	0.0444706
	limit Esi+ 1.7970005	19.078	0.00253972	0.0451998
	C7 H7 O5 S	16.9193	0.00254464	0.0451998
	PG(16:1(9Z)/20:3(5Z,8Z,11Z))	19.686	0.00261342	0.0460314
	PG(18:0/18:3(9Z,12Z,15Z))	20.0087	0.00265539	0.0463808
	limit Esi+ 1.7389994	17.6256	0.00273535	0.0471053
	Cinchonain Ib	15.6348	0.00277248	0.0471053
	MID73251:6-[2,3-Dihydroxy-1-(hydroxymethyl)propyl]-1,2-dihydro-7-hydroxy-9-methoxy-cyclopenta[c][1]b	16.4464	0.00279653	0.0471053
	C29 H45 N9 O2 Esi+ 1.7560002	16.8651	0.00280325	0.0471053
	C17 H35 S	16.6164	0.00281412	0.0471053
	UK-47265	19.5941	0.00283171	0.0471053
	DG(14:0/14:1(9Z)/0:0)	19.2797	0.00286677	0.0471719
	LysoPE(0:0/16:1(9Z))	23.3688	0.00288072	0.0471719
	C23 H54 N16	17.573	0.00296021	0.0480976
	Pentahomomethionine	18.1576	0.00300584	0.0484634
	C33 H14 N6 O2	13.2119	0.00310891	0.0497425
	C7 H9 N4 O	18.592	0.00314687	0.0499685
	Cymoxanil	15.3297	0.0031852	0.0501968
	DG(14:1(9Z)/16:0/0:0)	20.1114	0.00322943	0.0504504
	PE(22:1(13Z)/15:0) Esi+ 2.1129992	22.0089	0.00324943	0.0504504
	limit Esi+ 1.7299999	17.5058	0.00330531	0.0506009
	Deoxytubulosine	16.4185	0.00330741	0.0506009
	D-Urobilinogen Esi+ 5.4400015	15.3369	0.00339476	0.0513291
	none Esi+ 7.2940035 :112	13.7191	0.00340398	0.0513291
	Leiocarposide	13.6329	0.00350213	0.0524319
	Daphnoretin	14.832	0.00362713	0.0536421
	ADP-ribose 2'-phosphate	15.215	0.00363415	0.0536421
	Salannin Esi+ 5.4100027	17.8841	0.00375447	0.0545531
	PE(20:0/18:3(9Z,12Z,15Z))	18.9817	0.00375944	0.0545531
	Xanthurenic acid Esi+ 7.433001	15.6614	0.00377395	0.0545531
	DL-Homoserine	16.6953	0.00384097	0.0551416
	D-Urobilin Esi+ 5.4550014	16.966	0.0038821	0.0553529
	C32 H49 N3	16.9987	0.00397451	0.0562877
	C19 H44 Cl3 N6 O17 S	13.4605	0.00406621	0.0571998
	C21 H26 N6 O15 Esi+ 8.329001	17.2693	0.00422143	0.0588627
	C8 H7 N2 O	17.3857	0.00425101	0.0588627
	PE(15:0/18:1(9Z))	19.5273	0.00426867	0.0588627
	limit Esi+ 7.2879972	15.4673	0.0043805	0.0596596
	PI(18:1(11Z)/18:2(9Z,12Z))	14.6569	0.00438339	0.0596596
	C14 H29 N3 O3	16.1017	0.0045618	0.0616873
	Fagomine Esi+ 6.106002	14.3096	0.00459672	0.0617611
	C11 H14 N4 O12	15.4889	0.00476668	0.0636366
	3'-Keto-3'-deoxy-AMP	14.6895	0.00481275	0.0638451
	Aromatized deshydroxy-C-1027 chromophore Esi+ 1.2529994	14.3344	0.00486157	0.0640872
	limit Esi+ 1.2599995	12.8054	0.00514882	0.0671829
	limit Esi+ 4.563002	17.7845	0.00521508	0.0671829
	MK826	14.8532	0.00522842	0.0671829
	Porphobilinogen	15.1255	0.00525116	0.0671829
	CI Basic red 9	17.4963	0.00525668	0.0671829
	2-(4-Ethoxyphenyl)-5,6,7,8-tetramethoxy-4H-1-benzopyran-4-one	16.4344	0.00549385	0.0697885
	C29 H49 N3 O11	17.8741	0.00554747	0.0700451
	Demethylcitalopram	17.7385	0.00570232	0.0714752
	Palatinose Esi+ 9.411002	16.709	0.00572893	0.0714752
	C22 H33 N O	15.8208	0.00585341	0.0725961
	limit Esi+ 7.2330008	13.6732	0.00593828	0.0732155
	Integerressine	16.6059	0.00597348	0.0732188
	limit Esi+ 1.382	14.2996	0.00622792	0.0757023
	D-Sorbitol	14.9615	0.00624833	0.0757023
	limit Esi+ 6.147002	15.3887	0.0063356	0.0763184
	2-(4-Ethoxyphenyl)-5,6,7,8-tetramethoxy-4H-1-benzopyran-4-one Esi+ 8.407998 :111	16.4646	0.0064028	0.0766872
	C12 H27 N6 O2	14.2248	0.00654313	0.0779227
	2-(4-Ethoxyphenyl)-5,6,7,8-tetramethoxy-4H-1-benzopyran-4-one Esi+ 8.407998	16.4129	0.00660609	0.0782281
	Medicarpin 3-O-glucoside-6'-malonate	13.7175	0.00666833	0.0785215
	limit Esi+ 1.6959994	16.5528	0.00678858	0.0792989
	Aflatoxin B1exo-8,9-epoxide-GSH	14.3598	0.00688194	0.0792989
	D-Sorbitol Esi+ 4.48	14.9686	0.00688521	0.0792989
	C30 H56 N5 O3	15.7809	0.00688568	0.0792989
	C18 H22 N4 O13 S	16.4047	0.00698023	0.0799484
	C24 H43 N2 O	13.7027	0.00717906	0.0815587
	PE(18:1(11Z)/16:0)	20.7137	0.00719864	0.0815587
	XE991	16.3507	0.00727748	0.0820086
	Tiamulin	22.8862	0.00732569	0.0821105
	C39 H85 N9 O4	16.2332	0.00736741	0.0821388
	C39 H80 N6	15.5194	0.00760163	0.0841173
	Dubamine	13.5712	0.00762514	0.0841173
	D-Urobilinogen Esi+ 5.153	16.6077	0.00781756	0.0857885
	Alangimarine	14.7126	0.00798671	0.0870937
	L-Galactose	19.5032	0.0080196	0.0870937
	L-Galactose Esi+ 4.903 :17	19.5101	0.00807239	0.0872151
	Streptamine	16.8762	0.00816267	0.0877382
	L-Galactose Esi+ 4.903	19.5084	0.00828238	0.0885708
	PE(20:0/18:3(9Z,12Z,15Z)) Esi+ 6.238003	15.3541	0.00855614	0.0910338
	MG(0:0/16:1(9Z)/0:0) Esi+ 1.7429997	16.4326	0.00871714	0.0920367
	limit Esi+ 1.7050009	18.7799	0.00873822	0.0920367
	limit Esi+ 7.287	15.916	0.0088684	0.0929408
	2,5-Diamino-6-hydroxy-4-(5'-phosphoribosylamino)-pyrimidine	14.8006	0.0091062	0.0946036
	DG(15:0/16:1(9Z)/0:0)	15.3379	0.00911733	0.0946036
	limit Esi+ 7.0090017 :147	13.4784	0.0092037	0.0950293
	Saccharocin	14.6698	0.00936004	0.0961698
	C23 H25	14.8577	0.00972145	0.0993959
	Pyrazophos	18.5333	0.00979162	0.0996274
AveExpr: average log2-abundance for the metabolite over all samples.
P.value: raw p-value
FDR:Benjamini and Hochberg's method to control false discovery rate

## Sheet: Panel D
Ionization Mode	Metabolite	AveExpr	P.Value	FDR
Negative	D-Glucuronic acid Esi- 7.0450006	17.4157	6.91316e-07	0.000633245
	C20 H11 N12 O7	14.5586	1.36056e-05	0.00623135
	D-Glutamine	19.1645	6.35442e-05	0.0169073
	Adenosine5'-monophosphate	19.2949	8.72745e-05	0.0169073
	Adenosine5'-monophosphate Esi- 7.5650015	19.2952	9.22888e-05	0.0169073
	C6 H2 N4	16.55	0.000128034	0.0184182
	NS-102	13.8642	0.000143255	0.0184182
	C39 H48	13.9963	0.000160858	0.0184182
	PE(20:3(8Z,11Z,14Z)/15:0) Esi- 1.1910006	14.7019	0.000368696	0.0346689
	Ornaline	15.1273	0.000378481	0.0346689
	PE(20:3(8Z,11Z,14Z)/15:0)	14.6993	0.000444644	0.0370267
	PE(22:4(7Z,10Z,13Z,16Z)/15:0)	13.9872	0.000517953	0.0395371
	C36 H5 N6 O3	13.6353	0.000596027	0.041997
	PE(15:0/18:2(9Z,12Z))	13.967	0.000799852	0.0523332
	1-O,2-O,6-O-Trigalloyl-beta-D-glucose	13.6963	0.000915833	0.0559269
	PE(20:2(11Z,14Z)/16:1(9Z)) Esi- 1.1790006	14.915	0.00104472	0.05981
	Niridazole	14.6912	0.00151654	0.0817149
Positive	limit Esi+ 7.2330008	13.6732	6.44385e-05	0.0744453
	limit Esi+ 1.2309992	14.0933	7.10356e-05	0.0744453
AveExpr: average log2-abundance for the metabolite over all samples.
P.value: raw p-value
FDR:Benjamini and Hochberg's method to control false discovery rate

## Sheet: Panel E
Ionization Mode	Metabolite	AveExpr	P.Value	FDR
Negative	limit Esi- 7.625	13.42	4.9e-05	0.045
AveExpr: average log2-abundance for the metabolite over all samples.
P.value: raw p-value
FDR:Benjamini and Hochberg's method to control false discovery rate

## Sheet: Panel F
Ionization Mode	Metabolite	AveExpr	P.Value	FDR
Negative	Pleuromutilin Esi- 1.2719996 :30	15.3181	3.9163e-09	3.58733e-06
	1-Palmitoyl Lysophosphatidic Acid	13.6821	1.29663e-05	0.00508856
	Phenylacetothiohydroximate	15.9251	1.66656e-05	0.00508856
	Maculosine	16.0682	2.74213e-05	0.00615733
	2-Amino-4-oxo-4-alpha-hydroxy-6-(erythro-1',2',3'-trihydroxypropyl)-5,6,7,8-tetrahydroxypterin	13.5161	4.28808e-05	0.00615733
	DL-Methionine sulfoxide	19.4237	4.6084e-05	0.00615733
	DL-Methionine sulfoxide Esi- 7.523999	19.4234	4.70538e-05	0.00615733
	Cellotetraose	17.4045	6.35921e-05	0.00728129
	Cellotetraose Esi- 8.834999	17.3524	9.16152e-05	0.00932439
	C8 H10 N3 O6	13.7879	0.000109978	0.010074
	LysoPE(0:0/18:0)	15.4199	0.000449886	0.0374632
	MID74682:Tetradecanoic acid, 3-hydroxy-, (R)-; Tetradecanoic acid, 3-hydroxy-, D-(-)-; (3R)-3-Hydrox	15.4607	0.000497082	0.0379439
	C19 H28 N	17.5576	0.000559418	0.0381047
	Philanthotoxin 343 Esi- 4.6239977 :10	17.0542	0.000582386	0.0381047
	C25 H52 N22 O2	17.2528	0.00095998	0.0586228
	12-Hydroxydodecanoic acid	14.8468	0.0012203	0.0687188
	C15 H26 N3 O7 S2	15.5599	0.00133898	0.0687188
	Rifamycin W	14.9371	0.00139788	0.0687188
	C3 H6 N5 O3	14.6219	0.00144995	0.0687188
	C33 H39 N15 O3	13.9442	0.00150538	0.0687188
	C33 H49 N3 O14	14.5967	0.00157543	0.0687188
	Hexadecanedioic acid	14.4113	0.00196599	0.0818566
	C13 H16 N10 O7	15.5398	0.00222552	0.0885538
	C30 H56 O4	14.6438	0.00232019	0.0885538
Positive	Mannose 1-phosphate Esi+ 8.1310005	18.4604	1.01588e-06	0.00212928
	C15 H34 N2 S	14.6508	1.99418e-05	0.0208991
	Equilin sulfate	18.6559	6.54575e-05	0.0378357
	Cellotetraose	18.3546	9.00908e-05	0.0378357
	C24 H21 N13 O10	13.7803	0.000100279	0.0378357
	C9 H18 N4 O8 S2	16.6959	0.000108308	0.0378357
	3,6-Anhydrogalactose Esi+ 8.341002 :156	16.8656	0.000155136	0.0464371
	limit Esi+ 1.2529994 :162	13.5039	0.000177241	0.0464371
	Xanthurenic acid	19.7527	0.0002273	0.0529356
	DG(14:1(9Z)/16:0/0:0) Esi+ 1.4090003	16.5214	0.000291846	0.061171
	C7 H7 O5 S	16.9193	0.000324162	0.0617676
	2-Oxo-4-methylthiobutanoic acid	21.1951	0.000413038	0.0721439
	3,6-Anhydrogalactose Esi+ 8.341002	17.1068	0.000573263	0.0924276
AveExpr: average log2-abundance for the metabolite over all samples.
P.value: raw p-value
FDR:Benjamini and Hochberg's method to control false discovery rate
