# Supplementary material for: Age- and Genotype-Specific Effects of the Angiotensin-Converting Enzyme Inhibitor Lisinopril on Mitochondrial and Metabolic Parameters in <em>Drosophila melanogaster</em>
Source: Preprints.org preprint supplement (doi:10.20944/preprints201810.0133.v1), 2018-10-08
Supplement: Supplementary file 9 [file Supplementary Table 5.xlsx]

## Sheet: Sheet1
Ionization mode	Module	Pathway	Overlap_size	Pathway_size	Overlap_features (name)	Adjusted P-value
Negative	Green	tRNA charging pathway	2	17	L-methionine$L-histidine	0.0403775
	Red	alanine biosynthesis II	2	3	L-glutamate$pyruvate	0.0280707
		glutathione-mediated detoxification	2	3	pyruvate$L-glutamate	0.0280707
		itaconate degradation	2	3	itaconate$pyruvate	0.0280707
		lactose degradation III	2	3	&beta-D-galactose$&beta-D-glucose	0.0280707
		melibiose degradation	2	3	&beta-D-galactose$&beta-D-glucose	0.0280707
		proline degradation II	2	3	pyrroline 5-carboxylate$L-glutamate	0.0280707
		L-cysteine degradation I	2	3	pyruvate$L-glutamate	0.0280707
		alanine degradation III	2	3	L-glutamate$pyruvate	0.0280707
		5-aminoimidazole ribonucleotide biosynthesis I	2	4	L-glutamate$5'-phosphoribosyl-<i>N</i>-formylglycineamide	0.0523381
	Turquoise	glycogen degradation I	6	8	&alpha-D-glucose 1-phosphate$&alpha-D-glucose$&beta-D-glucose$&beta-D-glucose-6-phosphate$maltose$&alpha-D-glucose 6-phosphate	0.00126472
		glucose and glucose-1-phosphate degradation	4	5	&alpha-D-glucose 1-phosphate$&beta-D-glucose$&alpha-D-glucose 6-phosphate$&beta-D-glucose-6-phosphate$glucono-&delta-lactone	0.00171446
		<i>myo</i>-inositol biosynthesis	3	3	<I>myo</I>-inositol$D-<i>myo</i>-inositol (3)-monophosphate$&beta-D-glucose-6-phosphate	0.00220986
		lactose degradation III	3	3	lactose$&beta-D-galactose$&beta-D-glucose	0.00220986
		trehalose degradation II (trehalase)	3	3	trehalose$&beta-D-glucose$&beta-D-glucose-6-phosphate	0.00220986
		melibiose degradation	3	3	melibiose$&beta-D-glucose$&beta-D-galactose	0.00220986
		glycogen degradation II	3	3	&alpha-D-glucose 1-phosphate$&beta-D-glucose$&alpha-D-glucose 6-phosphate	0.00220986
		GDP-glucose biosynthesis	3	4	&alpha-D-glucose 1-phosphate$&beta-D-glucose$&alpha-D-glucose 6-phosphate$&beta-D-glucose-6-phosphate	0.00350581
		glycolysis III (Thermotoga)	3	5	fructose-6-phosphate$&beta-D-glucose$&beta-D-glucose-6-phosphate	0.00569986
		trehalose biosynthesis I	2	2	trehalose$&alpha-D-glucose 6-phosphate	0.00894182
		<i>S</i>-adenosyl-L-methionine cycle	2	3	L-methionine$L-homocysteine	0.0186058
		cysteine biosynthesis II	2	3	2-oxobutanoate$L-homocysteine	0.0186058
		methionine degradation I (to homocysteine)	2	3	L-methionine$L-homocysteine	0.0186058
		homocysteine degradation	2	3	2-oxobutanoate$L-homocysteine	0.0186058
		N-acetylglucosamine degradation	2	3	fructose-6-phosphate$acetate	0.0186058
		folate transformations	3	8	5,10-methylene-THF$L-homocysteine$5-formyl-tetrahydrofolate$L-methionine$10-formyl-tetrahydrofolate	0.0223775
		formylTHF biosynthesis I	3	9	5,10-methylene-THF$L-homocysteine$L-methionine$10-formyl-tetrahydrofolate	0.0330769
Ionization mode	Module	Pathway	Overlap_size	Pathway_size	Overlap_features (name)	Adjusted P-value
Positive	Blue	lactose degradation III	3	3	lactose$&beta-D-galactose$&beta-D-glucose	0.000220475
		melibiose degradation	3	3	melibiose$&beta-D-glucose$&beta-D-galactose	0.000220475
		glycogen degradation I	4	8	&beta-D-glucose$maltotriose$maltose$&alpha-D-glucose	0.000247536
		trehalose degradation II (trehalase)	2	3	trehalose$&beta-D-glucose	0.00117368
	Red	glutaryl-CoA degradation	7	11	acetoacetyl-CoA$coenzyme A$FADH<SUB>2</SUB>$glutaryl-CoA$3-hydroxybutyryl-CoA$acetyl-CoA$glutaconyl-CoA	0.00142196
		degradation of purine ribonucleosides	5	7	inosine$hypoxanthine$xanthine$guanosine$adenosine	0.0018324
		tetrapyrrole biosynthesis II	4	5	uroporphyrinogen-III$coenzyme A$succinyl-CoA$porphobilinogen	0.00223768
		mevalonate pathway	4	5	coenzyme A$acetoacetyl-CoA$3-hydroxy-3-methyl-glutaryl-CoA$acetyl-CoA	0.00223768
		itaconate degradation	4	5	itaconyl-CoA$coenzyme A$succinyl-CoA$acetyl-CoA	0.00223768
		GDP-D-rhamnose biosynthesis	3	3	GDP-D-rhamnose$GDP-D-mannose$GDP-4-dehydro-6-deoxy-D-mannose	0.00298786
		salvage pathways of adenine, hypoxanthine, and their nucleosides	5	9	inosine$deoxyadenosine$hypoxanthine$xanthine$adenosine	0.00390428
		purine deoxyribonucleosides degradation	5	9	coenzyme A$deoxyguanosine$deoxyadenosine$acetyl-CoA$hypoxanthine	0.00390428
		isoleucine degradation I	6	13	propionyl-CoA$L-isoleucine$FADH<SUB>2</SUB>$2-methylacetoacetyl-CoA$acetyl-CoA$coenzyme A	0.00580541
		2-methylbutyrate biosynthesis	5	10	coenzyme A$propionyl-CoA$FADH<SUB>2</SUB>$acetyl-CoA$2-methylacetoacetyl-CoA	0.00601778
		inosine-5'-phosphate biosynthesis II	3	4	10-formyl-tetrahydrofolate$5-aminoimidazole ribonucleotide$tetrahydrofolate	0.00609789
		valine degradation I	5	11	isobutyryl-CoA$propionyl-CoA$FADH<SUB>2</SUB>$L-valine$coenzyme A	0.00937325
		salvage pathways of guanine, xanthine, and their nucleosides	3	5	deoxyguanosine$xanthine$guanosine	0.0121356
		mevalonate degradation	3	5	coenzyme A$3-hydroxy-3-methyl-glutaryl-CoA$acetyl-CoA	0.0121356
		leucine degradation I	5	12	coenzyme A$FADH<SUB>2</SUB>$L-leucine$acetyl-CoA$3-hydroxy-3-methyl-glutaryl-CoA	0.0145261
		fatty acid biosynthesis initiation II	2	2	coenzyme A$acetyl-CoA	0.0153682
		CDP-diacylglycerol biosynthesis	2	2	coenzyme A$<i>sn</i>-glycerol-3-phosphate	0.0153682
		triacylglycerol biosynthesis	2	2	coenzyme A$<i>sn</i>-glycerol-3-phosphate	0.0153682
		acetyl-CoA biosynthesis (from citrate)	2	2	coenzyme A$acetyl-CoA	0.0153682
		4-hydroxybenzoate biosynthesis I (eukaryotes)	4	9	coenzyme A$4-coumaroyl-CoA$4-hydroxybenzoyl-CoA$acetyl-CoA	0.0174438
		fatty acids biosynthesis (yeast)	3	6	coenzyme A$malonyl-CoA$acetyl-CoA	0.0226995
		serotonin and melatonin biosynthesis	3	6	coenzyme A$4&alpha-hydroxy-tetrahydrobiopterin$acetyl-CoA	0.0226995
		5-aminoimidazole ribonucleotide biosynthesis I	3	6	10-formyl-tetrahydrofolate$5-aminoimidazole ribonucleotide$tetrahydrofolate	0.0226995
		TCA cycle variation III (eukaryotic)	3	6	coenzyme A$succinyl-CoA$acetyl-CoA	0.0226995
		tRNA charging pathway	5	14	L-proline$L-isoleucine$L-leucine$L-valine$L-alanine	0.0329067
		very long chain fatty acid biosynthesis	2	3	coenzyme A$malonyl-CoA	0.0367513
		GDP-L-fucose biosynthesis I (from GDP-D-mannose)	2	3	GDP-D-mannose$GDP-4-dehydro-6-deoxy-D-mannose	0.0367513
		NAD salvage pathway III	2	3	nicotinamide riboside$nicotinamide mononucleotide	0.0367513
		acetate conversion to acetyl-CoA	2	3	coenzyme A$acetyl-CoA	0.0367513
		lactose degradation III	2	3	&beta-D-galactose$&beta-D-glucose	0.0367513
		melibiose degradation	2	3	&beta-D-galactose$&beta-D-glucose	0.0367513
		pentose phosphate pathway (partial)	2	3	D-erythrose-4-phosphate$D-sedoheptulose-7-phosphate	0.0367513
		pentose phosphate pathway (non-oxidative branch)	2	3	D-erythrose-4-phosphate$D-sedoheptulose-7-phosphate	0.0367513
		fatty acid &beta;-oxidation I	3	7	coenzyme A$FADH<SUB>2</SUB>$acetyl-CoA	0.0393698
		formylTHF biosynthesis I	4	11	7,8-dihydrofolate$L-homocysteine$tetrahydrofolate$10-formyl-tetrahydrofolate	0.0432581
	Black	aerobic respiration -- electron donors reaction list	3	5	ubiquinone-<i>8</i>$ubiquinol-<i>8</i>$NAD<sup>+</sup>	0.000717885
		degradation of pyrimidine deoxyribonucleosides	3	6	deoxycytidine$acetyl-CoA$NAD<sup>+</sup>	0.000902211
		salvage pathways of adenine, hypoxanthine, and their nucleosides	3	9	inosine$NAD<sup>+</sup>$adenine	0.00196329
		purine deoxyribonucleosides degradation	3	9	acetyl-CoA$NAD<sup>+</sup>$adenine	0.00196329
		threonine degradation II	2	4	NAD<sup>+</sup>$acetyl-CoA	0.00449601
		acetyl-CoA biosynthesis (from pyruvate)	2	4	NAD<sup>+</sup>$acetyl-CoA	0.00449601
		oxidative ethanol degradation III	2	5	NAD<sup>+</sup>$acetyl-CoA	0.00716514
		oxidative ethanol degradation I	2	5	NAD<sup>+</sup>$acetyl-CoA	0.00716514
		mevalonate degradation	2	5	NAD<sup>+</sup>$acetyl-CoA	0.00716514
		fatty acid &beta;-oxidation II (core pathway)	2	5	acetyl-CoA$NAD<sup>+</sup>	0.00716514
		fatty acids biosynthesis (yeast)	2	6	acetyl-CoA$NAD<sup>+</sup>	0.0109347
		proline degradation I	2	6	L-proline$NAD<sup>+</sup>	0.0109347
		glycolysis III (Thermotoga)	2	6	&beta-D-glucose$NAD<sup>+</sup>	0.0109347
		TCA cycle variation III (eukaryotic)	2	6	acetyl-CoA$NAD<sup>+</sup>	0.0109347
		zymosterol biosynthesis	2	7	zymosterol$4&alpha-hydroxymethyl-4&beta-methyl-5&alpha-cholesta-8,24-dien-3&beta-ol	0.0160473
		degradation of purine ribonucleosides	2	7	inosine$adenine	0.0160473
		fatty acid &beta;-oxidation I	2	7	acetyl-CoA$NAD<sup>+</sup>	0.0160473
		4-hydroxybenzoate biosynthesis I (eukaryotes)	2	9	acetyl-CoA$NAD<sup>+</sup>	0.0311945
		2-methylbutyrate biosynthesis	2	10	acetyl-CoA$NAD<sup>+</sup>	0.0415896
		glutaryl-CoA degradation	2	11	acetyl-CoA$NAD<sup>+</sup>	0.0540247
		valine degradation I	2	11	L-valine$NAD<sup>+</sup>	0.0540247
	Green	isoleucine degradation I	4	13	2-methyl-3-hydroxybutyryl-CoA$2-methylacetoacetyl-CoA$L-isoleucine$tiglyl-CoA	0.000355996
		2-methylbutyrate biosynthesis	3	10	2-methyl-3-hydroxybutyryl-CoA$2-methylacetoacetyl-CoA$tiglyl-CoA	0.000638364
		leucine degradation I	3	12	3-methylcrotonyl-CoA$L-leucine$3-hydroxy-3-methyl-glutaryl-CoA	0.000888622
		tRNA charging pathway	3	14	L-proline$L-isoleucine$L-leucine	0.00124818
	Purple	NAD biosynthesis from 2-amino-3-carboxymuconate semialdehyde	4	6	AMP$L-glutamate$aminocarboxymuconate semialdehyde$L-glutamine	0.000641053
		asparaginyl-tRNA<sup>asn</sup> biosynthesis via transamidation	3	3	AMP$L-glutamate$L-glutamine	0.000686425
		glutaminyl-tRNA<sup>gln</sup> biosynthesis via transamidation	3	3	AMP$L-glutamate$L-glutamine	0.000686425
		pyrimidine ribonucleotides interconversion	3	3	L-glutamate$UMP$L-glutamine	0.000686425
		L-cysteine degradation I	3	3	L-glutamate$2-ketoglutarate$3-sulfinoalanine	0.000686425
		glutamate biosynthesis I	3	4	L-glutamate$L-glutamine$2-ketoglutarate	0.000874618
		asparagine biosynthesis III	3	4	AMP$L-glutamate$L-glutamine	0.000874618
		glutamine degradation II	3	4	L-glutamate$L-glutamine$2-ketoglutarate	0.000874618
		tRNA charging pathway	5	14	L-methionine$AMP$L-glutamate$L-glutamine$L-lysine	0.00104429
		proline biosynthesis II	3	5	L-glutamate-5-phosphate$L-glutamate$2-ketoglutarate	0.00115443
		uridine-5'-phosphate biosynthesis	3	5	orotidine-5'-phosphate$L-glutamate$UMP$L-glutamine	0.00115443
		UDP-<i>N</i>-acetyl-D-glucosamine biosynthesis II	3	6	fructose-6-phosphate$L-glutamate$L-glutamine	0.00155612
		glutamine biosynthesis I	2	2	L-glutamate$L-glutamine	0.00206152
		glutamate biosynthesis II	2	2	L-glutamate$2-ketoglutarate	0.00206152
		aspartate biosynthesis	2	2	L-glutamate$2-ketoglutarate	0.00206152
		glutamate degradation X	2	2	L-glutamate$2-ketoglutarate	0.00206152
		glutamine degradation I	2	2	L-glutamate$L-glutamine	0.00206152
		arginine biosynthesis IV	3	8	AMP$L-glutamate$2-ketoglutarate	0.00289222
		4-hydroxyphenylpyruvate biosynthesis	2	3	L-glutamate$2-ketoglutarate	0.00364186
		glutamate biosynthesis III	2	3	L-glutamate$2-ketoglutarate	0.00364186
		alanine biosynthesis II	2	3	L-glutamate$2-ketoglutarate	0.00364186
		trehalose biosynthesis I	2	3	trehalose$&alpha-D-glucose 6-phosphate	0.00364186
		trehalose degradation II (trehalase)	2	3	trehalose$&beta-D-glucose-6-phosphate	0.00364186
		tyrosine degradation I	2	3	L-glutamate$2-ketoglutarate	0.00364186
		alanine degradation III	2	3	L-glutamate$2-ketoglutarate	0.00364186
		folate polyglutamylation I	2	4	5,10-methylene-THF$L-glutamate	0.00599581
		isoleucine biosynthesis from threonine	2	4	L-glutamate$2-ketoglutarate	0.00599581
		aspartate degradation II	2	4	L-glutamate$2-ketoglutarate	0.00599581
		L-carnitine biosynthesis	2	5	2-ketoglutarate$&gamma-butyrobetaine	0.00929096
		lipoate biosynthesis and incorporation II	2	5	L-methionine$AMP	0.00929096
		proline biosynthesis III	2	5	L-glutamate$2-ketoglutarate	0.00929096
		serine biosynthesis	2	5	L-glutamate$2-ketoglutarate	0.00929096
		arginine degradation VI (arginase 2 pathway)	2	5	L-glutamate$2-ketoglutarate	0.00929096
		4-hydroxyproline degradation I	2	5	L-glutamate$2-ketoglutarate	0.00929096
		glycolysis II	2	5	fructose-6-phosphate$AMP	0.00929096
		leucine degradation I	3	12	L-glutamate$3-methylglutaconyl-CoA$3-hydroxy-3-methyl-glutaryl-CoA$2-ketoglutarate	0.00932504
		isoleucine degradation I	3	13	2-methylacetoacetyl-CoA$L-glutamate$2-ketoglutarate	0.0121145
		5-aminoimidazole ribonucleotide biosynthesis I	2	6	L-glutamate$L-glutamine	0.0136656
		arginine degradation I (arginase pathway)	2	6	L-glutamate$2-ketoglutarate	0.0136656
		glycolysis I	2	6	fructose-6-phosphate$&beta-D-glucose-6-phosphate$AMP	0.0136656
		gluconeogenesis	2	7	fructose-6-phosphate$&beta-D-glucose-6-phosphate$AMP	0.0192165
		glycogen degradation I	2	8	&alpha-D-glucose 1-phosphate$&alpha-D-glucose 6-phosphate$&beta-D-glucose-6-phosphate$maltose	0.0259938
		folate transformations	2	9	5,10-methylene-THF$L-methionine	0.0340011
		tryptophan degradation to 2-amino-3-carboxymuconate semialdehyde	2	9	aminocarboxymuconate semialdehyde$2-amino-3-carboxymuconate semialdehyde	0.0340011
		formylTHF biosynthesis I	2	11	5,10-methylene-THF$L-glutamate$L-methionine	0.0535199
		valine degradation I	2	11	L-glutamate$2-ketoglutarate	0.0535199
